# Supplementary material for: Environmental effects on fatigue of aluminium and titanium alloys
Source: MDPI journal article supplement (doi:10.3390/cells11172644), 1977-06-30
Supplement: s1 [file s1]

# Distinct and dynamic transcriptome adaptations of iPSC-generated astrocytes after cytokine stimulation

Anna-Sophie Spreng <sup>1,2</sup>, Markus Brüll <sup>1</sup>, Heidrun Leisner <sup>1</sup>, Ilinca Suciu <sup>1,2</sup> and Marcel Leist <sup>1,3,\*</sup>

| Table of Contents |     |                                                                                                      |
|-------------------|-----|------------------------------------------------------------------------------------------------------|
| Figure S1         | P2  | Gene expression of human astrocytes during differentiation                                           |
| Figure S2         | P3  | Translocation of NFκB in astrocytes after stimulation with cytokines                                 |
| Figure S3         | P4  | NFκB translocation in AC precursor populations after stimulation with cytokines                      |
| Figure S4         | P5  | Transcriptional response of ACs to stimulation with LPS                                              |
| Figure S5         | P6  | Genes uniquely expressed in ACs stimulated with cytokines for 24 h                                   |
| Figure S6         | P7  | Transcriptional response of ACs to IFNγ stimulation for 24 h                                         |
| Figure S7         | P8  | Transcriptional response of ACs to TNFα stimulation for 24 h                                         |
| Figure S8         | P9  | Transcriptional response of ACs to combined treatment with TNFα <i>plus</i> IFNγ for 24 h            |
| Figure S9         | P10 | Overrepresentation of transcription factor binding sites amongst ACs regulated by cytokines          |
| Figure S10        | P11 | Response of ACs to cytokines upon stimulation for 2 h                                                |
| Figure S11        | P12 | Time-dependent transcriptome response of ACs to TNFα stimulation                                     |
| Figure S12        | P13 | Time-dependent transcriptome response of ACs to IFNγ stimulation                                     |
| Figure S13        | P14 | Time-dependent transcriptome response of ACs to combined TNFα <i>plus</i> IFNγ stimulation           |
| Figure S14        | P15 | Differential regulation of additional genes coding for inflammation markers                          |
| Figure S15        | P16 | Response of ACs to cytokines upon stimulation for 72 h                                               |
| Figure S16        | P17 | Schematic workflow for the quantification of morphological changes in ACs stimulated with cytokines  |
| Table S1          | P18 | Additional information on the differentiation                                                        |
| Table S2          | P19 | Comparison of markers with TIC-induced astrocytes                                                    |
| Table S3          | P20 | Overview of genes uniquely differentially expressed (DEGs) in ACs stimulated with cytokines for 72 h |
| Table S4          | P21 | Overview and exact significance numbers of top 20 deregulated transcription factors (72 h)           |
| Table S5          | P22 | Overview and exact significance numbers of top 20 enriched gene sets (72 h)                          |
| Table S6          | P23 | Overview of primers used for real-time qPCR                                                          |
| Table S7          | P24 | Antibodies used for immunofluorescent staining                                                       |
| Table S8          | P25 | Antibodies used for western blot                                                                     |
|                   | P26 | Supplementary references                                                                             |

## A Kinetics of AC marker expression

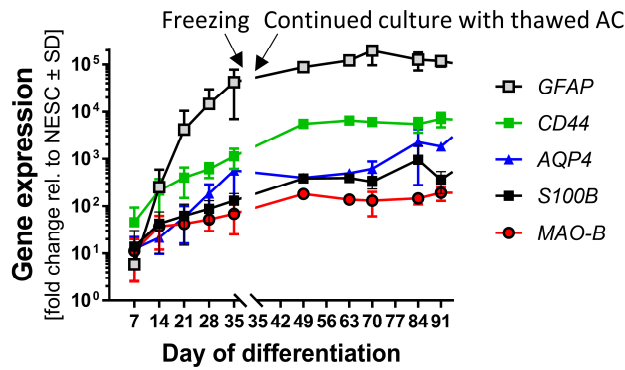

## B Differentially expressed genes in APC vs. NESC and AC vs. NESC

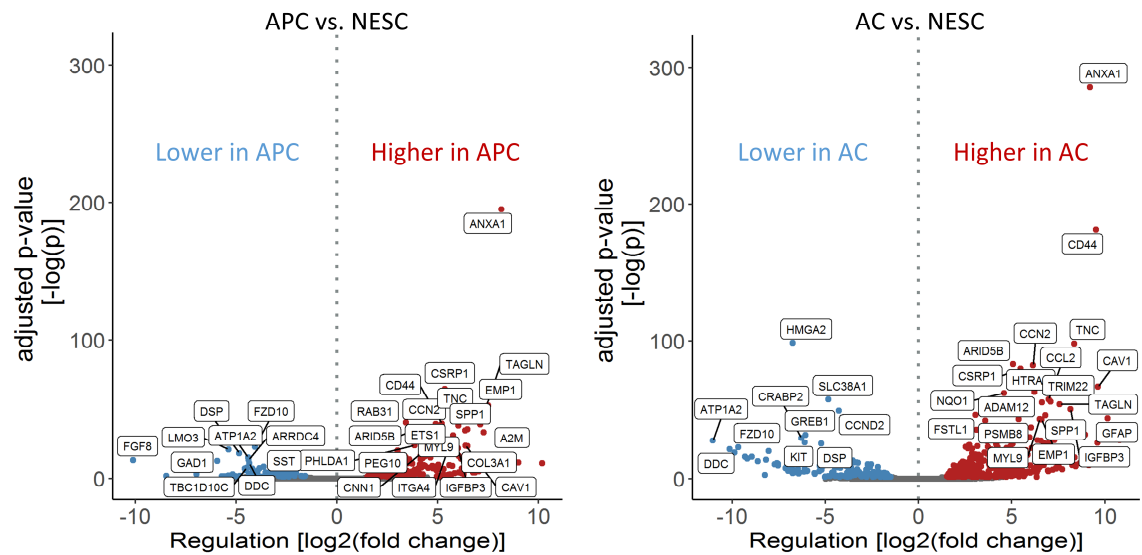

**Figure S1. Gene expression of human astrocytes during differentiation.** ACs were differentiated from neuroepithelial stem cells (NECs) and expression changes of mRNA was followed for >100 days. The protocol involved three separate stages: (i) differentiation of NECs to astrocyte progenitor cells (APCs) within 2 weeks (see Figure 1); (ii) differentiation of APCs to astrocytes (ACs) within 35 days, with freezing of cells thereafter; (iii) maturation of thawed ACs for further 63 days. (A) Five indicated AC markers (S100B, GFAP, CD44, AQP4 and MAO-B) were investigated by RT-qPCR gene expression analysis during the differentiation of APCs to fully matured ACs (98 days). Aliquots from parallel cultures were lysed and used for mRNA preparation and gene expression values are indicated relative to their expression in NECs. Data are means  $\pm$  SD of  $\geq 3$  independent differentiations. (B) The gene expression of APCs, ACs and NEC precursors was quantified for a panel of 3562 genes (four samples each) using targeted transcriptome analysis (TempOseq method). Data was analyzed to identify differentially expressed genes (DEGs) of APCs (left plot) or ACs (right plot) vs. NECs. Volcano plots show the statistical significance corrected for false discovery (adjusted p-value) in relation to the magnitude of regulation ( $\log_2$ (fold change)) of every gene in the panel. DEGs are shown in blue if they were downregulated vs. NECs ( $p_{\text{adj}} < 0.05$ ,  $\log_2\text{FC} < -0.5$ ); and in red if they were upregulated vs. NECs ( $p_{\text{adj}} < 0.05$ ,  $\log_2\text{FC} > 0.5$ ). Nonregulated genes are shown in grey. The most significantly regulated genes are annotated (top 10 downregulated DEGs, top 20 upregulated DEGs).



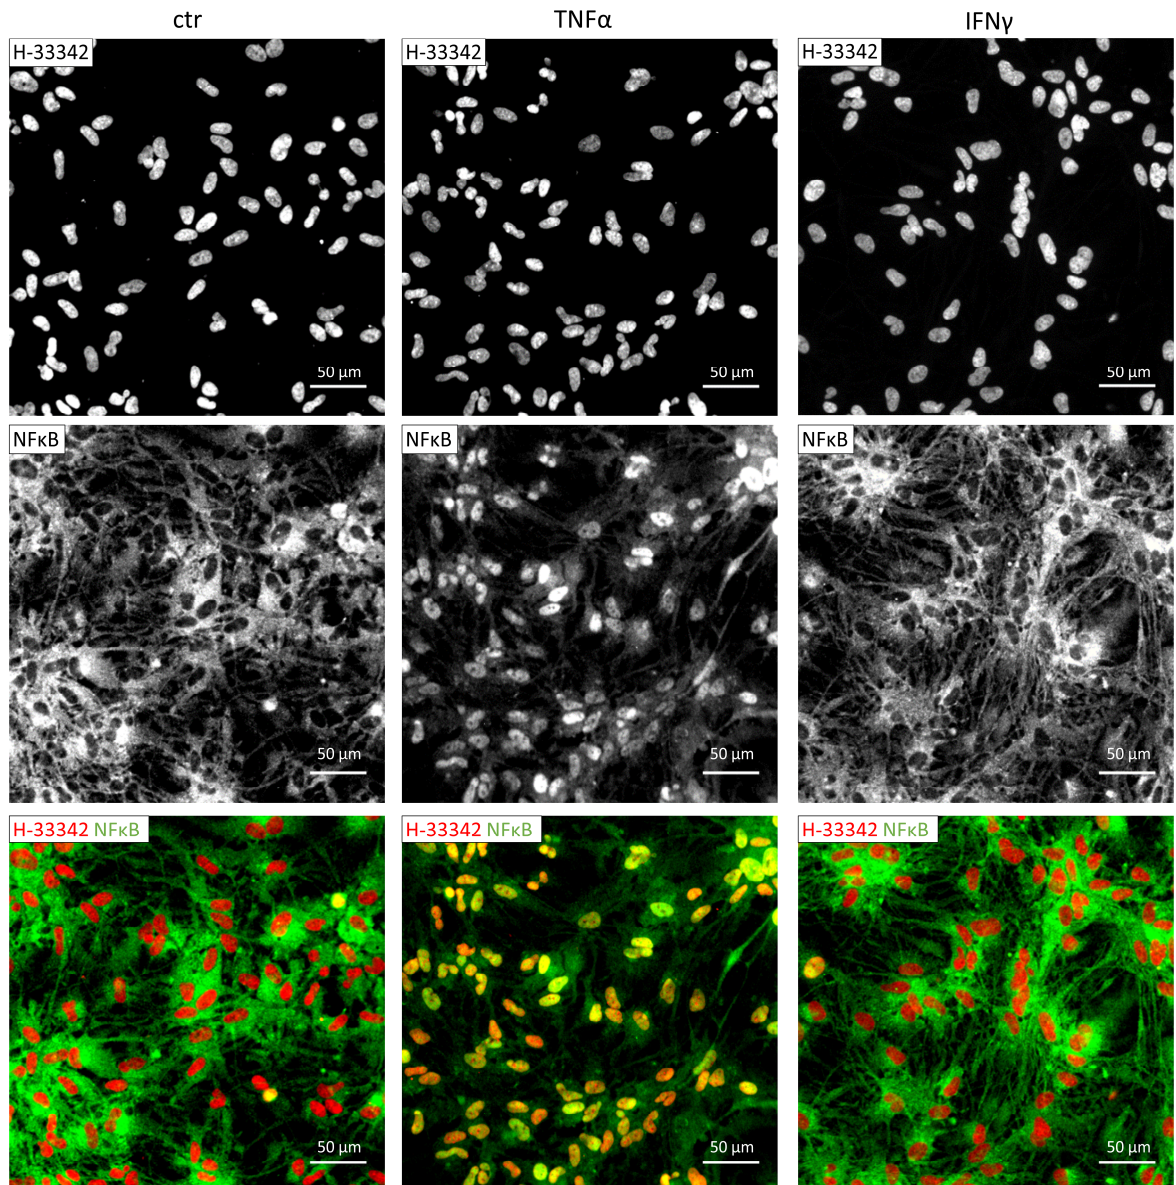

**Figure S2. Translocation of NFκB in astrocytes after stimulation with cytokines.** ACs were differentiated from APCs for more than 35 days. Three days after seeding (50,000 cells/cm<sup>2</sup>), cells were stimulated with cytokines: TNFα (10 ng/ml) or IFNγ (20 ng/ml). At 30 min after treatment, ACs were fixed and immunostained against the NFκB subunit p65. The nuclei were counterstained with Hoechst-33342. Exemplary images are shown which depict the same image fields as in Figure 2B, but give information on all fluorescent channels and their overlay.

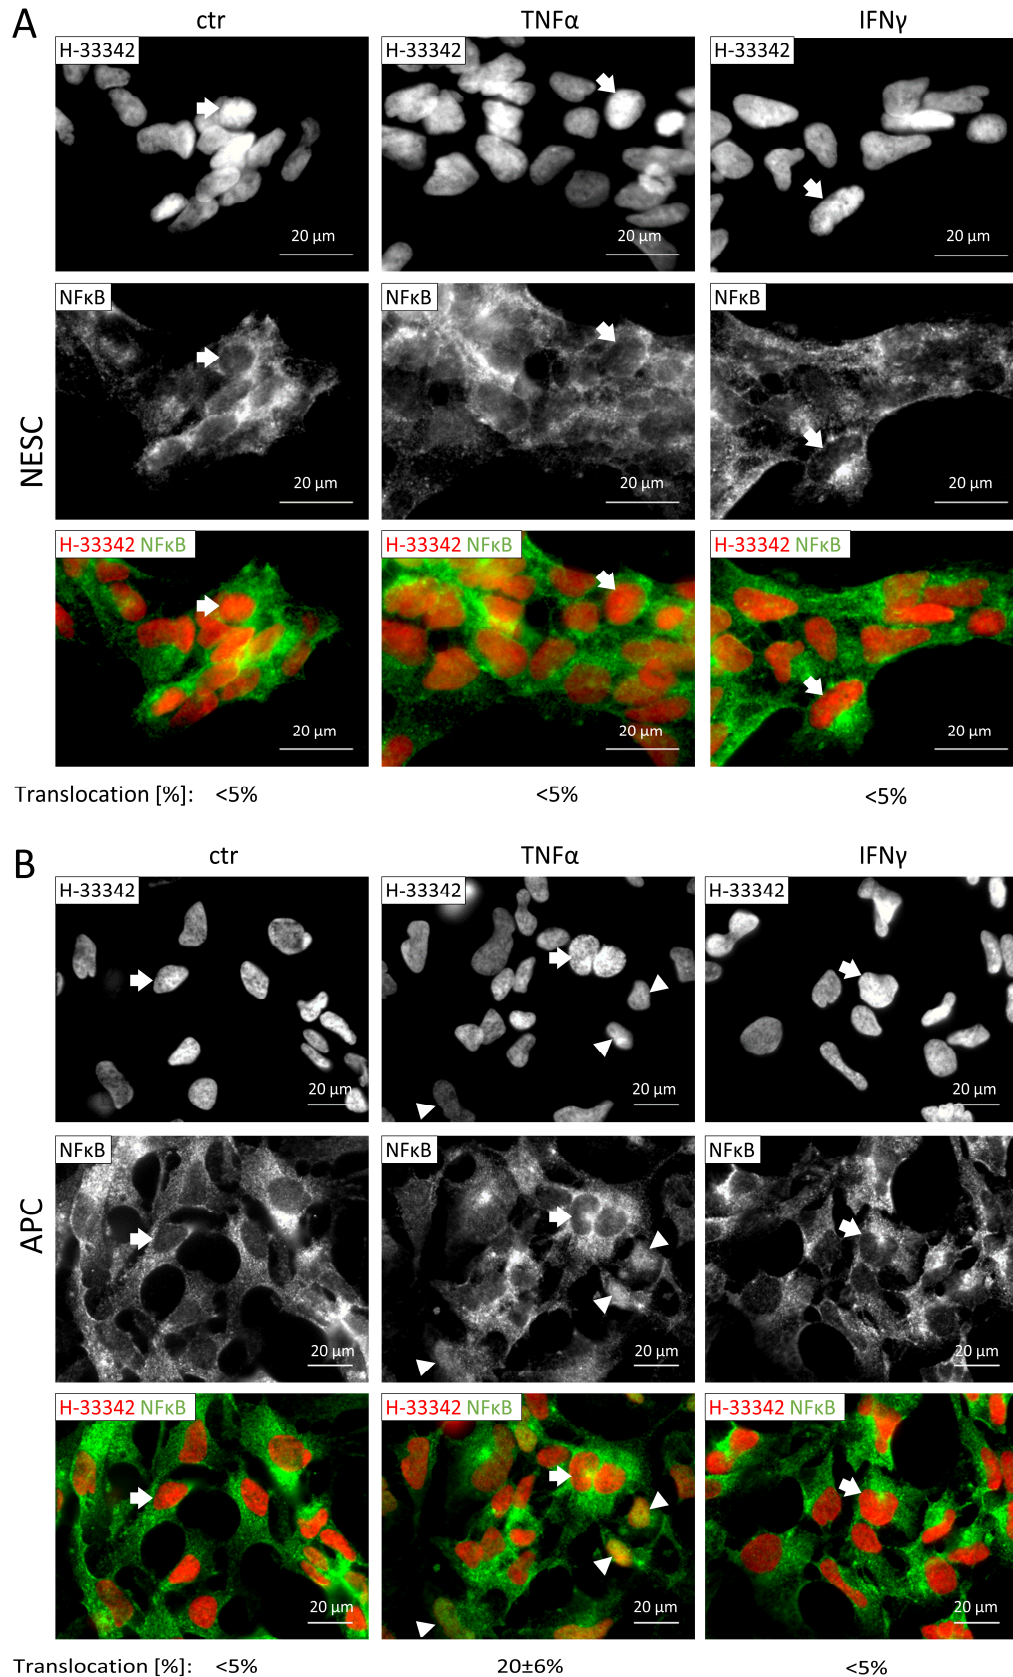

**Figure S3. NFκB translocation in AC precursor populations after stimulation with cytokines.** Neuroepithelial stem cells (NESC) and astrocyte precursor cells (APCs) were differentiated from human iPSCs as described in Figure 1. At 24 h after seeding (50,000 cells/cm<sup>2</sup>), the cells were stimulated with cytokines (TNF $\alpha$  (10 ng/ml) or IFN $\gamma$  (20 ng/ml)). They were fixed 30 min later and immunostained against the NFκB subunit p65. The nuclei were counterstained with Hoechst H-33342. (A) The experiment was performed with NESC and representative images are shown. Quantification of NFκB translocation was performed using an ArrayScan™ high-content

imaging device and a fully automated image recognition algorithm. Data are shown as the mean percentage of cells (n=3) with a nuclear NFκB p65 localization after cytokine stimulation. Arrows indicate exemplary nuclei in which NFκB p65 signals were absent (but cytosolic staining is visible). (B) The experiment was performed with APCs and representative images are shown. Quantification of NFκB translocation was performed using an ArrayScan™ high-content imaging device and a fully automated image recognition algorithm. Data are shown as the mean percentage of cells (n=3) with a nuclear NFκB p65 localization after cytokine stimulation. Arrows indicate nuclei in which NFκB p65 signals were absent (but cytosolic staining is visible). Arrowheads exemplify nuclei with NFκB p65 staining.

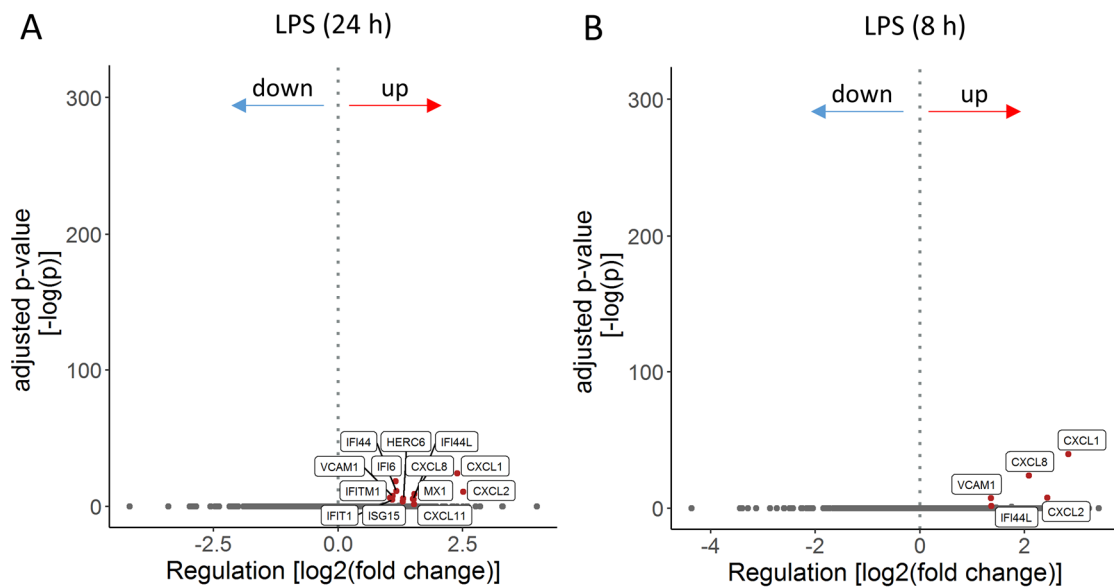

**Figure S4. Transcriptional response of ACs to stimulation with LPS.** ACs were seeded at a density of 50,000 cells/cm<sup>2</sup> into 96-well plates. On the next days, cells were stimulated with lipopolysaccharide from *Escherichia coli* O55:B5 (LPS; 100 ng/ml). After 8 h and 24 h, cells were lysed and gene expression profiling was performed for 3562 genes using RNASeq analysis (TempOSeq method). Data was analyzed to identify differentially expressed genes (DEGs) of ACs stimulated for (A) 8 h or (B) 24 h. The volcano plots show on the y-axis the statistical significance corrected for false discovery (adjusted p-value). The x-axis describes the magnitude of regulation fold change (FC) of every gene in the panel. Each DEG is represented by a grey dot in this plot. Some DEGs are shown in red. These were up-regulated vs. control (solvent) if the p-value was < 0.05 and FC > 1. All significantly regulated genes are annotated.



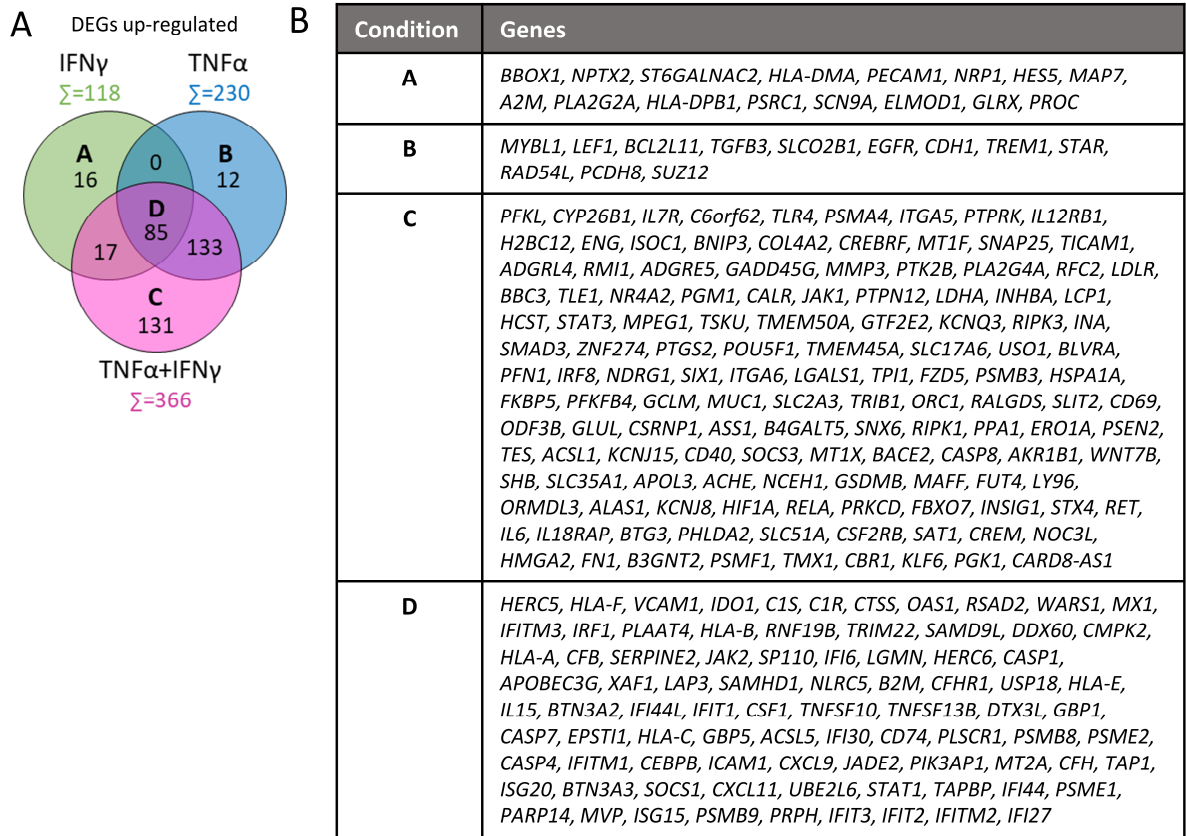

**Figure S5. Genes uniquely expressed in ACs stimulated with cytokines for 24 h. (A)** Venn diagram depicting the number of genes up-regulated in ACs  $\geq 2$ -fold and with  $p_{adj} < 0.05$ . Numbers in overlapping areas represent the genes commonly regulated. **(B)** Genes uniquely expressed in ACs stimulated with TNF $\alpha$  only (A), IFN $\gamma$  only (B), co-treatment with TNF $\alpha$  and IFN $\gamma$  (C) or genes overlapping between all conditions (D).

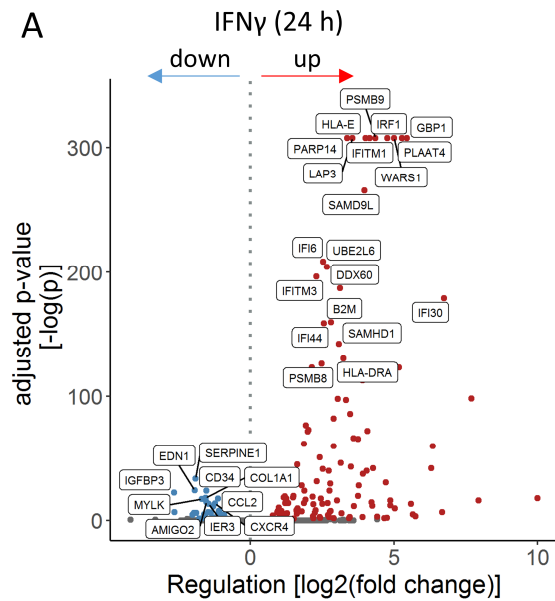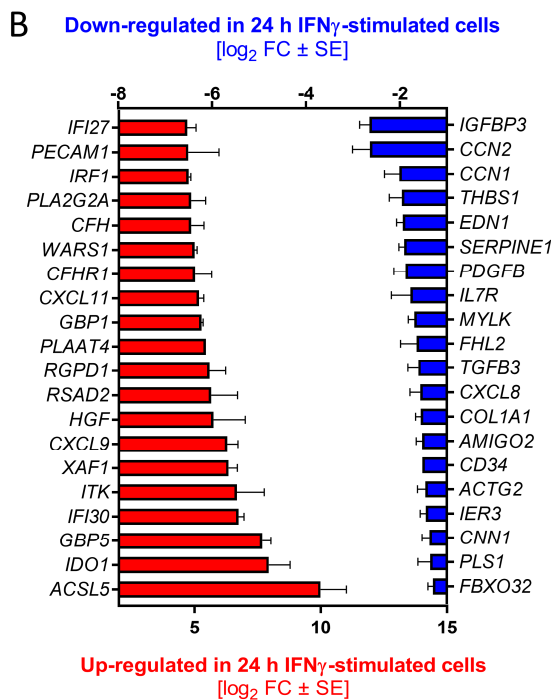

**Figure S6. Transcriptional response of ACs to IFN $\gamma$  stimulation for 24 h.** ACs were seeded at a density of 50,000 cells/cm<sup>2</sup> into 96-well plates. Three days after seeding, cells were stimulated with IFN $\gamma$  (20 ng/ml). After 24 h, cells were lysed and gene expression profiling was performed for 3562 genes using RNASeq analysis (TempOSeq method). Data was analyzed to identify differentially expressed genes (DEGs) of stimulated ACs relative to control ACs. (A) Volcano plots show the statistical significance corrected for false discovery (adjusted p-value ( $p_{adj}$ )) in relation to the magnitude of regulation (log<sub>2</sub>(fold change)) of every gene in the panel. DEGs are shown in blue, if they were downregulated vs. control ACs ( $p_{adj} < 0.05$ , log<sub>2</sub>FC < -0.5); and in red if they were upregulated vs. control ACs ( $p_{adj} < 0.05$ , log<sub>2</sub>FC > 0.5). Non-regulated genes are shown in grey. The top 20 up/down-regulated DEGs are annotated. (B) Bar graphs, showing the top 20 up- and down-regulated DEGs of ACs stimulated with IFN $\gamma$  for 24 h. The error bars represent the standard deviation. Data are means  $\pm$  SE, n=4.

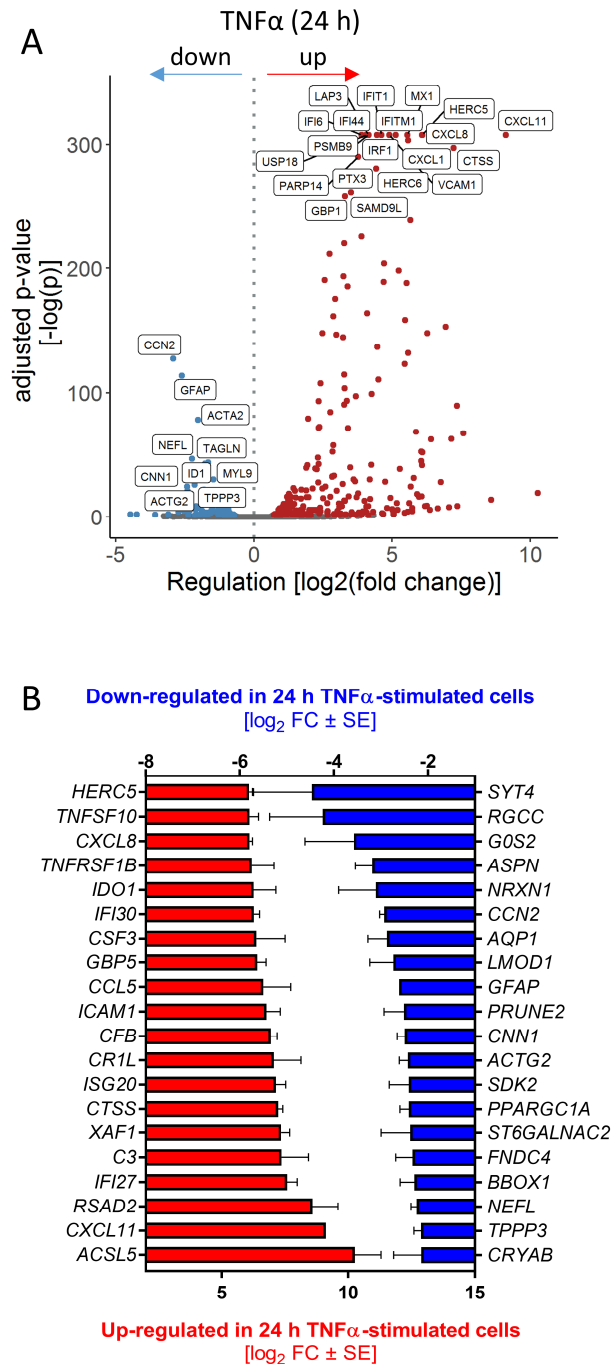

**Figure S7. Transcriptional response of ACs to TNF $\alpha$  stimulation for 24 h.** ACs were seeded at a density of 50,000 cells/cm<sup>2</sup> into 96-well plates. Three days after seeding, cells were stimulated with TNF $\alpha$  (10 ng/ml). After 24 h, cells were lysed and gene expression profiling was performed for 3562 genes using RNASeq analysis (TempOSeq method). Data was analyzed to identify differentially expressed genes (DEGs) of stimulated ACs relative to control ACs. (A) Volcano plots show the statistical significance corrected for false discovery (adjusted p-value ( $p_{adj}$ )) in relation to the magnitude of regulation ( $\log_2$ (fold change)) of every gene in the panel. DEGs are shown in blue, if they were downregulated vs. control AC ( $p_{adj} < 0.05$ ,  $\log_2FC < -0.5$ ); and in red if they were upregulated vs. control ACs ( $p_{adj} < 0.05$ ,  $\log_2FC > 0.5$ ). Non-regulated genes are shown in grey. The top 20 up/down-regulated DEGs are annotated. (B) Bar graphs, showing the top 20 up- and down-regulated DEGs of ACs stimulated with TNF $\alpha$  for 24 h. The error bars represent the standard deviation. Data are means  $\pm$  SE,  $n=4$ .

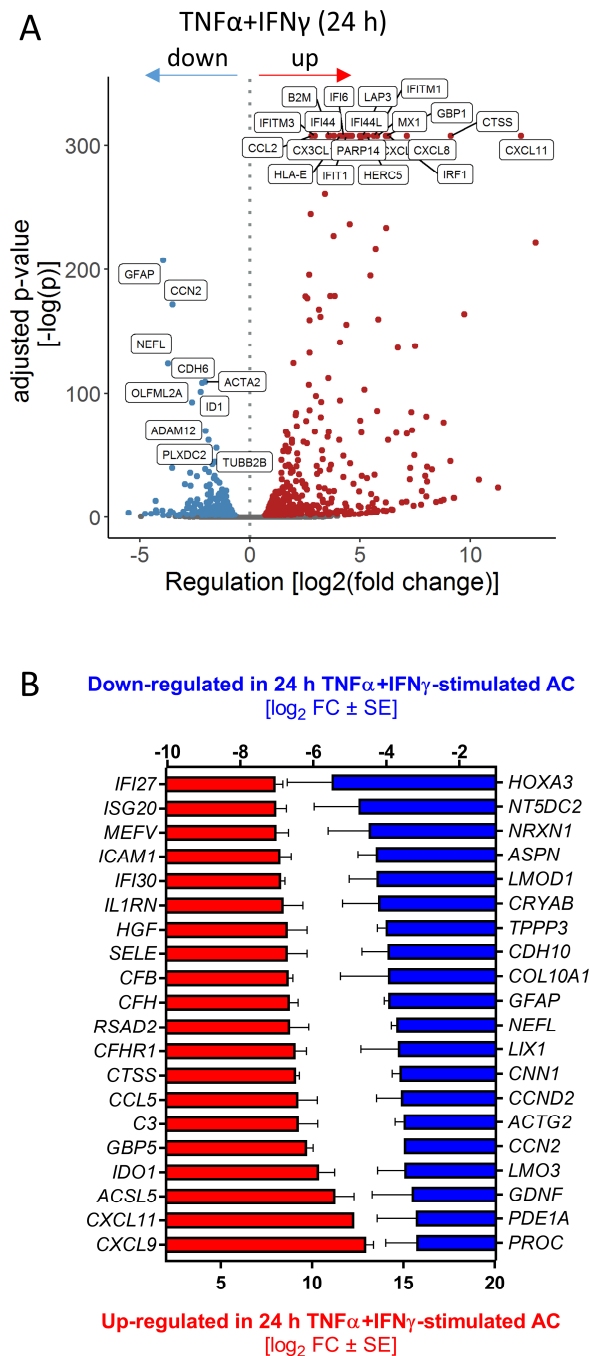

**Figure S8. Transcriptional response of ACs to combined treatment with  $\text{TNF}\alpha$  plus  $\text{IFN}\gamma$  for 24 h.** ACs were seeded at a density of 50,000 cells/cm<sup>2</sup> into 96-well plates. Three days after seeding, cells were stimulated with  $\text{TNF}\alpha$  (10 ng/ml) and  $\text{IFN}\gamma$  (20 ng/ml). After 24 h, cells were lysed and gene expression profiling was performed for 3562 genes using RNASeq analysis (TempOSeq method). Data was analyzed to identify differentially expressed genes (DEGs) of stimulated ACs relative to control AC. (A) Volcano plots show the statistical significance corrected for false discovery (adjusted p-value ( $p_{\text{adj}}$ )) in relation to the magnitude of regulation ( $\log_2(\text{fold change})$ ) of every gene in the panel. DEGs are shown in blue, if they were downregulated vs. control ACs ( $p_{\text{adj}} < 0.05$ ,  $\log_2\text{FC} < -0.5$ ); and in red if they were upregulated vs. control AC ( $p_{\text{adj}} < 0.05$ ,  $\log_2\text{FC} > 0.5$ ). Non-regulated genes are shown in grey. The top 20 up/down-regulated DEGs are annotated. (B) Bar graphs, showing the top 20 up- and down-regulated DEGs of ACs stimulated with  $\text{TNF}\alpha$  plus  $\text{IFN}\gamma$  for 24 h. The error bars represent the standard deviation. Data are means  $\pm$  SE,  $n=4$ .

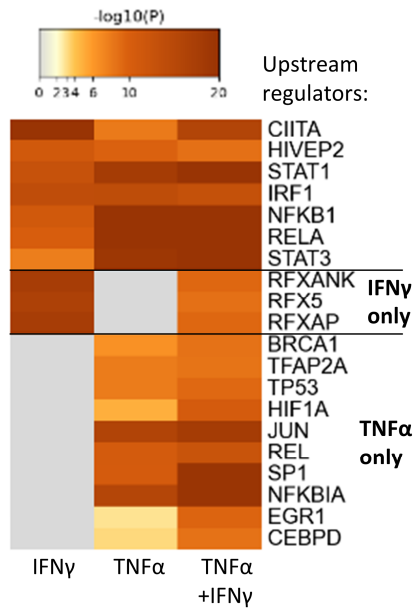

**Figure S9. Overrepresentation of transcription factor binding sites amongst ACs regulated by cytokines.** Transcription factors (TF) whose binding sites were over-represented on promoters of up-regulated DEGs ( $p_{\text{adj}} < 0.05$ ,  $\text{FC} \geq 2$ ) in ACs stimulated for 24 h with TNF $\alpha$  (10 ng/ml), IFN $\gamma$  (20 ng/ml) or the combination of TNF $\alpha$  (10 ng/ml) *plus* IFN $\gamma$  (20 ng/ml) were identified using Metascape [1] and labelled here as “upstream regulators”. Shown are the top 20 key regulators based on the TRRUST database (v.2) according to p-value. They are clustered by p-value at each treatment condition. Cytokines with unique activation of TF are implicated to the right. The p-value metrics are indicated by a colour code (darker brown intensity = lower p-value = higher over-representation). Grey fields code for non-over-represented TF at the respective stimulation condition.



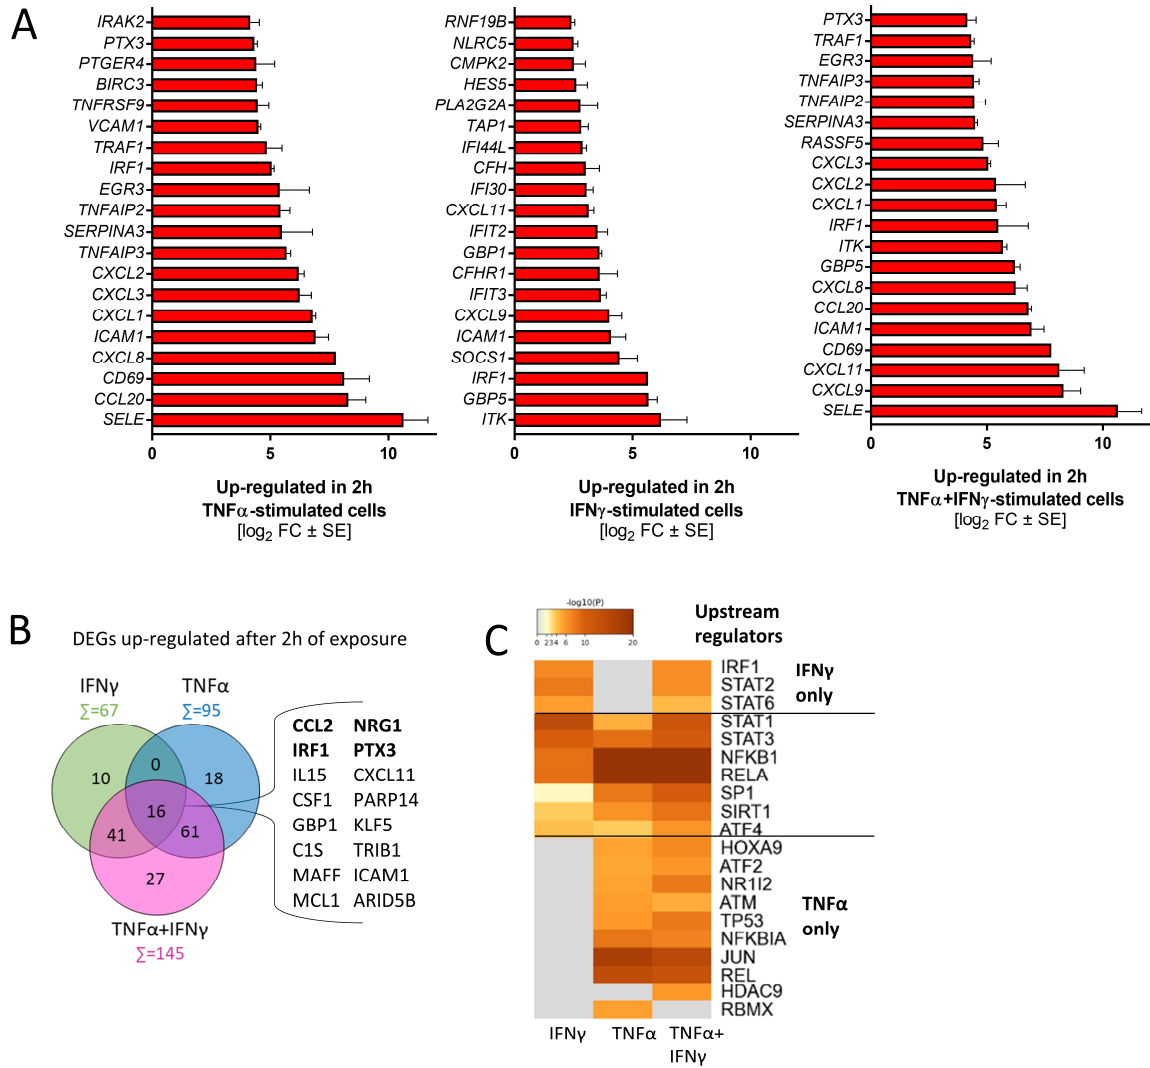

**Figure S10. Response of ACs to cytokines upon stimulation for 2 h.** ACs were seeded at a density of 50,000 cells/cm<sup>2</sup> into 96-well plates. Four days after seeding, cells were stimulated with TNF $\alpha$  (10 ng/ml), IFN $\gamma$  (20 ng/ml) or a combination of TNF $\alpha$  (10 ng/ml) *plus* IFN $\gamma$  (20 ng/ml). After 2 h, cells were lysed and gene expression profiling was performed for 3562 genes. **(A)** Bar graphs depicting the top 20 up-regulated genes in TNF $\alpha$  stimulated ACs (left blot), IFN $\gamma$  stimulated ACs (middle) and TNF $\alpha$  *plus* IFN $\gamma$  co-stimulated ACs (right). The error bars represent the standard deviation. Data are means  $\pm$  SE, n=4. **(B)** Venn diagram depicting the number of genes up-regulated in ACs  $\geq 2$ -fold and with  $p_{adj} < 0.05$ . Numbers in overlapping areas represent the genes commonly regulated, indicated are the genes which overlap between all treatment conditions. **(C)** Transcription factors (TF) whose binding sites were over-represented on promoters of up-regulated DEGs ( $p_{adj} < 0.05$ , FC  $\geq 2$ ) in ACs stimulated for 2 h with TNF $\alpha$  (10 ng/ml), IFN $\gamma$  (20 ng/ml) or the combination of TNF $\alpha$  (10 ng/ml) and IFN $\gamma$  (20 ng/ml) were identified using Metascape [1] and labelled here as “upstream regulators”. Shown are the top 20 key regulators based on the TRRUST database (v.2) according to p-value. They are clustered by p-value at each treatment condition. Cytokines with unique activation of TF are implicated to the right. The p-value metrics are indicated by a color code (darker brown intensity = lower p-value = higher over-representation). Grey fields code for non-over-represented TF at the respective stimulation condition.

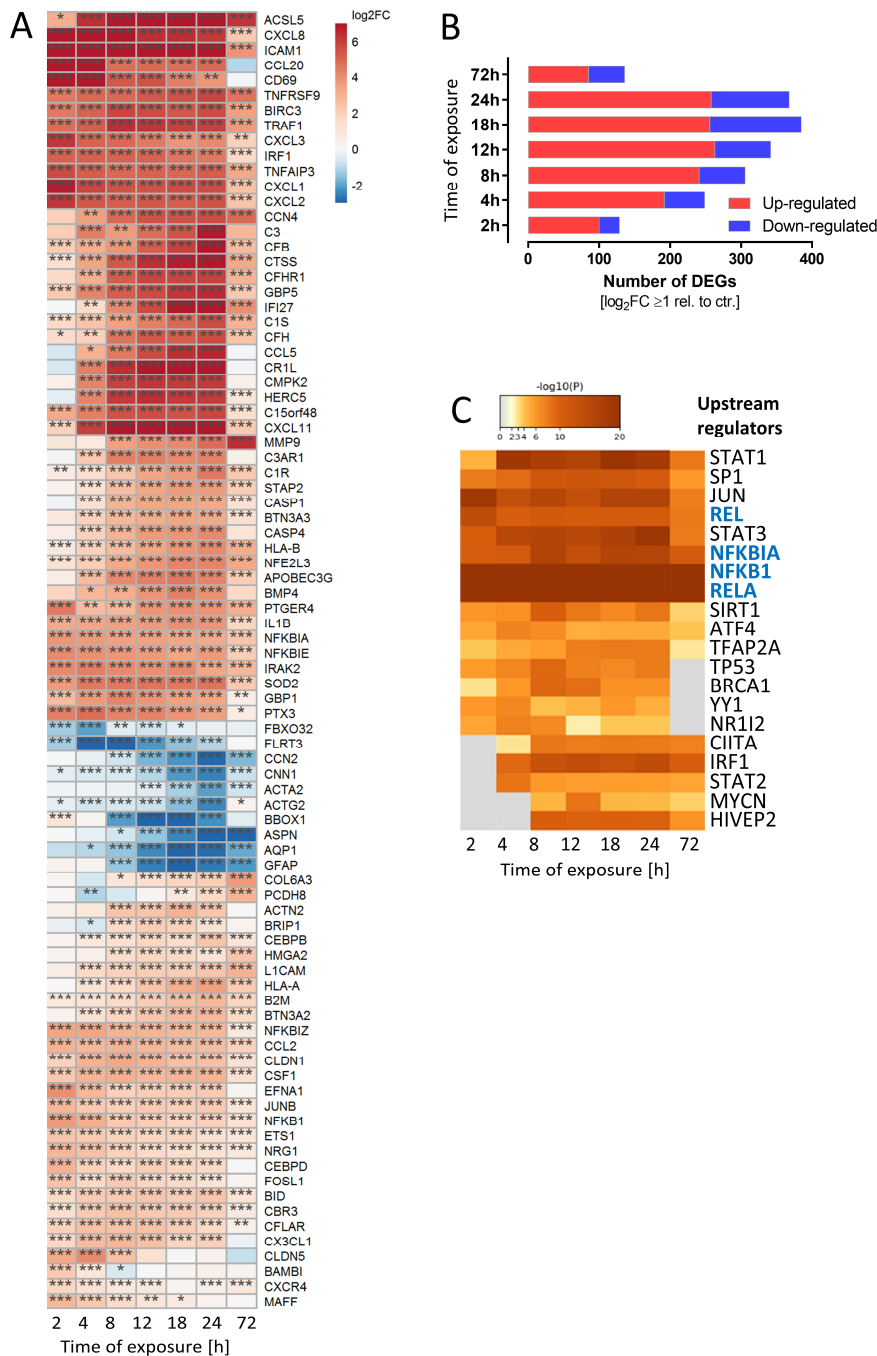

**Figure S11. Time-dependent transcriptome response of ACs to TNF $\alpha$  stimulation.** ACs were seeded at a density of 50,000 cells/cm<sup>2</sup> into 96-well plates. On the following days, cells were stimulated with TNF $\alpha$  (10 ng/ml). After indicated time periods, cells were lysed and gene expression profiling was performed for 3562 genes. **(A)** Heat map showing the top regulated genes across all time points after treatment with TNF $\alpha$ . The top 30 most regulated genes were identified for each time point and merged to a common gene list. The log<sub>2</sub> fold change (log<sub>2</sub>FC) against untreated cells is shown (red: up-regulation; blue: down-regulation). Row-wise clustering was performed to group genes with similar regulation patterns. Asterisks indicate the FDR-corrected statistical significance of the expression *vs.* untreated control cells. \*p<sub>adj</sub> < 0.05, \*\*p<sub>adj</sub> < 0.01, \*\*\*p<sub>adj</sub> < 0.001. **(B)** The total number of differentially expressed genes (DEGs) are depicted. Genes were considered as differentially expressed with p-value  $\leq 0.05$  (after false discovery rate adjustment) and an absolute log<sub>2</sub>fold change of  $\geq 0.5$ . **(C)** Transcription factors (TF) whose binding sites were over-represented on promoters of up-regulated DEGs (p<sub>adj</sub> < 0.05, FC  $\geq 2$ ) in ACs stimulated for the indicated time periods with TNF $\alpha$  (10 ng/ml) were identified using Metascape [1], and labelled here as “upstream regulators”. Shown are the top 20 key regulators based on the TRRUST database (v.2) according to p-value. They are clustered by p-value at each treatment condition. Cytokines with unique activation of TF are implicated to the right. The p-value metrics are indicated by a color code (darker brown intensity = lower p-value = higher over-representation). Grey fields code for non-over-represented TF at the respective stimulation condition.

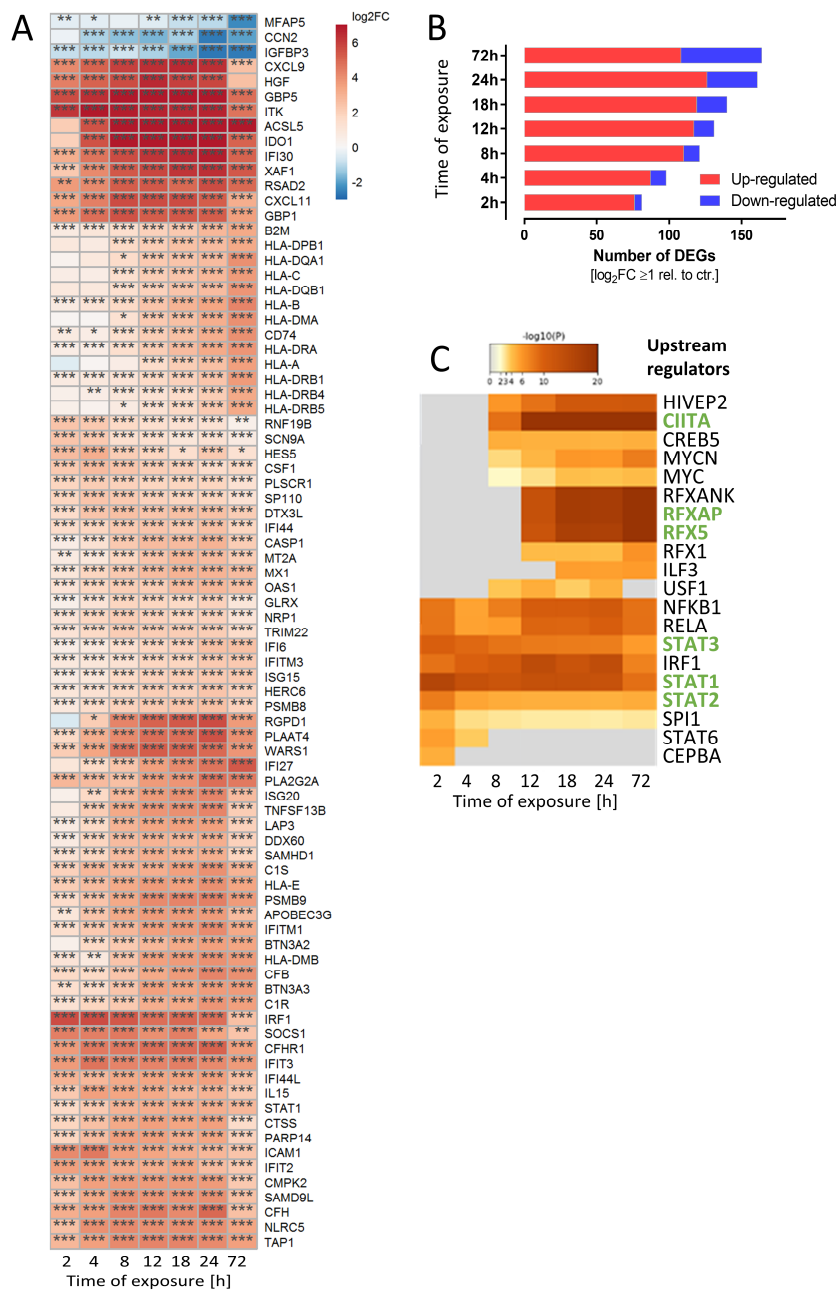

**Figure S12. Time-dependent transcriptome response of ACs to IFN $\gamma$  stimulation.** ACs were seeded at a density of 50,000 cells/cm<sup>2</sup> into 96-well plates. On the following days, cells were stimulated with IFN $\gamma$  (20 ng/ml). After indicated time periods, cells were lysed and gene expression profiling was performed for 3562 genes. **(A)** Heat map showing the top regulated genes across all time points after treatment with IFN $\gamma$ . The top 30 most regulated genes were identified for each time point and merged to a common gene list. The log<sub>2</sub> fold change (log<sub>2</sub>FC) against untreated cells is shown (red: up-regulation; blue: down-regulation). Row-wise clustering was performed to group genes with similar regulation patterns. Asterisks indicate the FDR-corrected statistical significance of the expression vs. untreated control cells. \*p<sub>adj</sub> < 0.05, \*\*p<sub>adj</sub> < 0.01, \*\*\*p<sub>adj</sub> < 0.001. **(B)** The total number of differentially expressed genes (DEGs) are depicted. Genes were considered as differentially expressed with p-value  $\leq 0.05$  (after false discovery rate adjustment) and an absolute log<sub>2</sub>fold change of  $\geq 0.5$ . **(C)** Transcription factors (TF) whose binding sites were over-represented on promoters of up-regulated DEGs (p<sub>adj</sub> < 0.05, FC  $\geq 2$ ) in ACs stimulated for the indicated time periods with IFN $\gamma$  (20 ng/ml) were identified using Metascape [1], and labelled here as “upstream regulators”. Shown are the top 20 key regulators based on the TRRUST database (v.2) according to p-value. They are clustered by p-value at each treatment condition. Cytokines with unique activation of TF are implicated to the right. The p-value metrics are indicated by a colour code (darker brown intensity = lower p-value = higher over-representation). Grey fields code for non-over-represented TF at the respective stimulation condition.

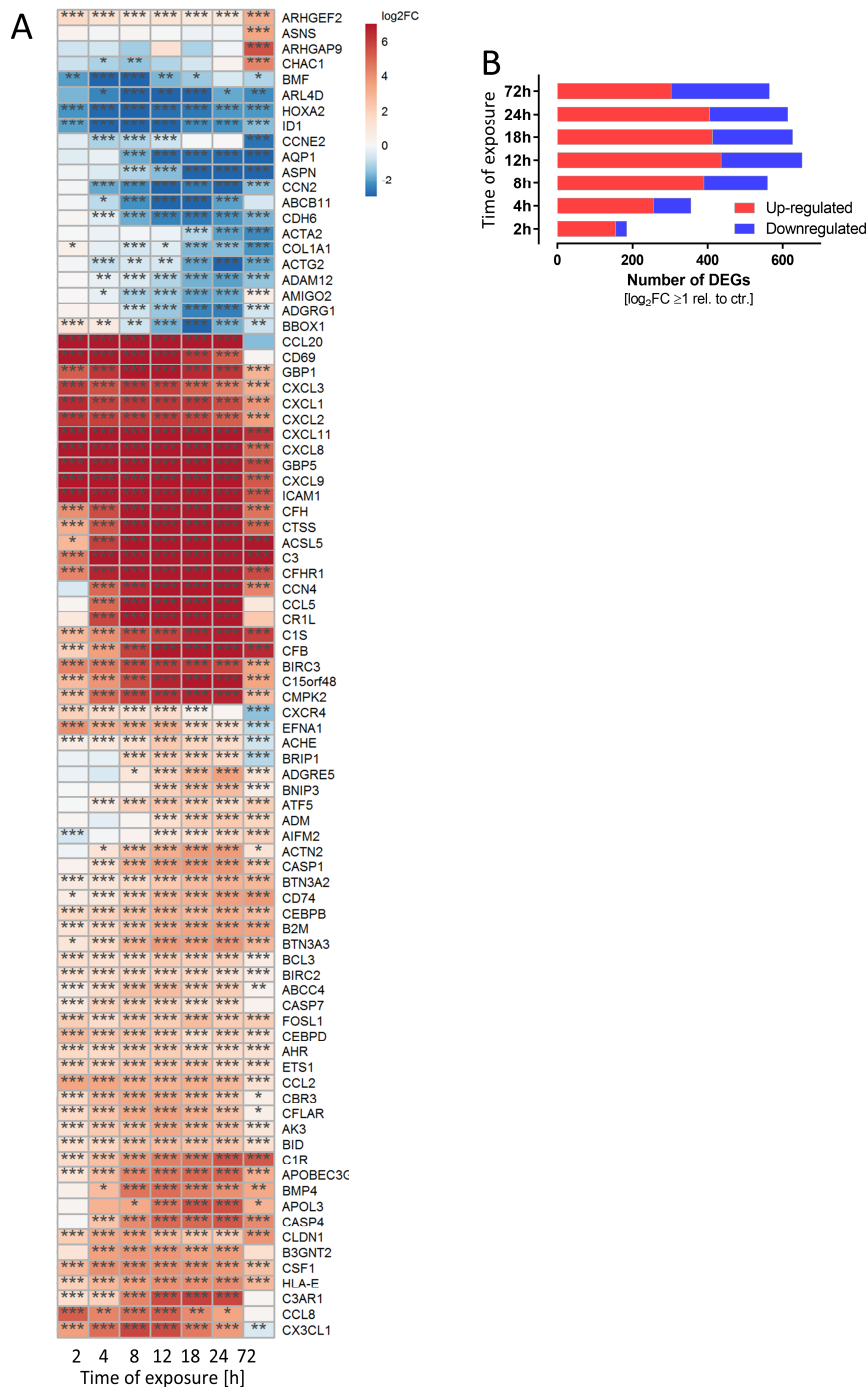

**Figure S13. Time-dependent transcriptome response of ACs to combined TNF $\alpha$  plus IFN $\gamma$  stimulation.** ACs were seeded at a density of 50,000 cells/cm<sup>2</sup> into 96-well plates. On the following days, cells were stimulated with TNF $\alpha$  (10 ng/ml) and IFN $\gamma$  (20 ng/ml). After indicated time periods, cells were lysed and gene expression profiling was performed for 3562 genes. (A) Heat map showing the top regulated genes across all time points after combined treatment with TNF $\alpha$  and IFN $\gamma$ . The top 30 most regulated genes were identified for each time point and merged to a common gene list. The log<sub>2</sub> fold change (log<sub>2</sub>FC) against untreated cells is shown (red: up-regulation; blue: down-regulation). Row-wise clustering was performed to group genes with similar regulation patterns. Asterisks indicate the FDR-corrected statistical significance of the expression *vs.* untreated control cells. \*p<sub>adj</sub> < 0.05, \*\*p<sub>adj</sub> < 0.01, \*\*\*p<sub>adj</sub> < 0.001. (B) The total number of differentially expressed genes (DEGs) are depicted. Genes were considered as differentially expressed with p-value ≤ 0.05 (after false discovery rate adjustment) and an absolute log<sub>2</sub>fold change of ≥ 0.5.

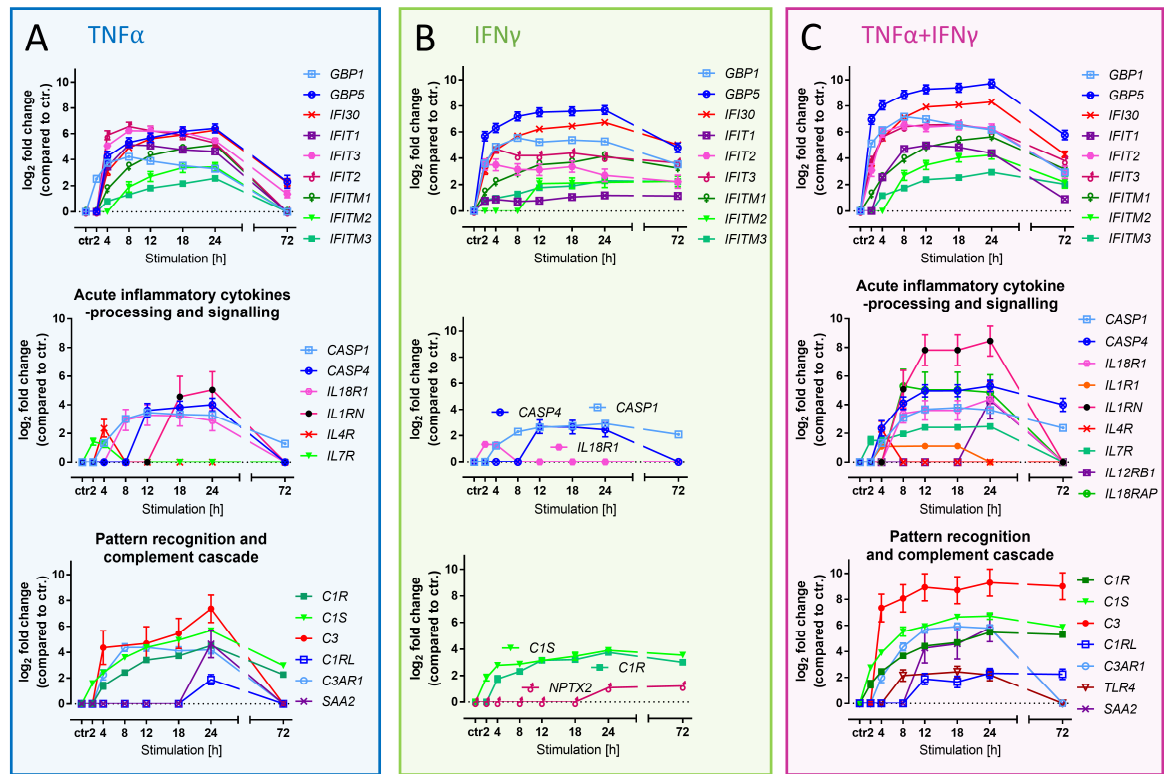

**Figure S14. Differential regulation of additional genes coding for inflammation markers.** ACs were seeded at a density of 50,000 cells/cm<sup>2</sup> into 96-well plates. On the following days, cells were stimulated with (A) TNF $\alpha$  (10 ng/ml), (B) IFN $\gamma$  (20 ng/ml) or the combination of (C) TNF $\alpha$  (10 ng/ml) *plus* IFN $\gamma$  (20 ng/ml). After indicated time periods, cells were lysed and gene expression profiling was performed for 3562 genes. Depicted are levels of mRNA for exemplary proteins involved in diverse inflammation processes. All data are means  $\pm$  SE from four samples (two samples each from 2 independent differentiations). Ctr.: unstimulated control ACs.

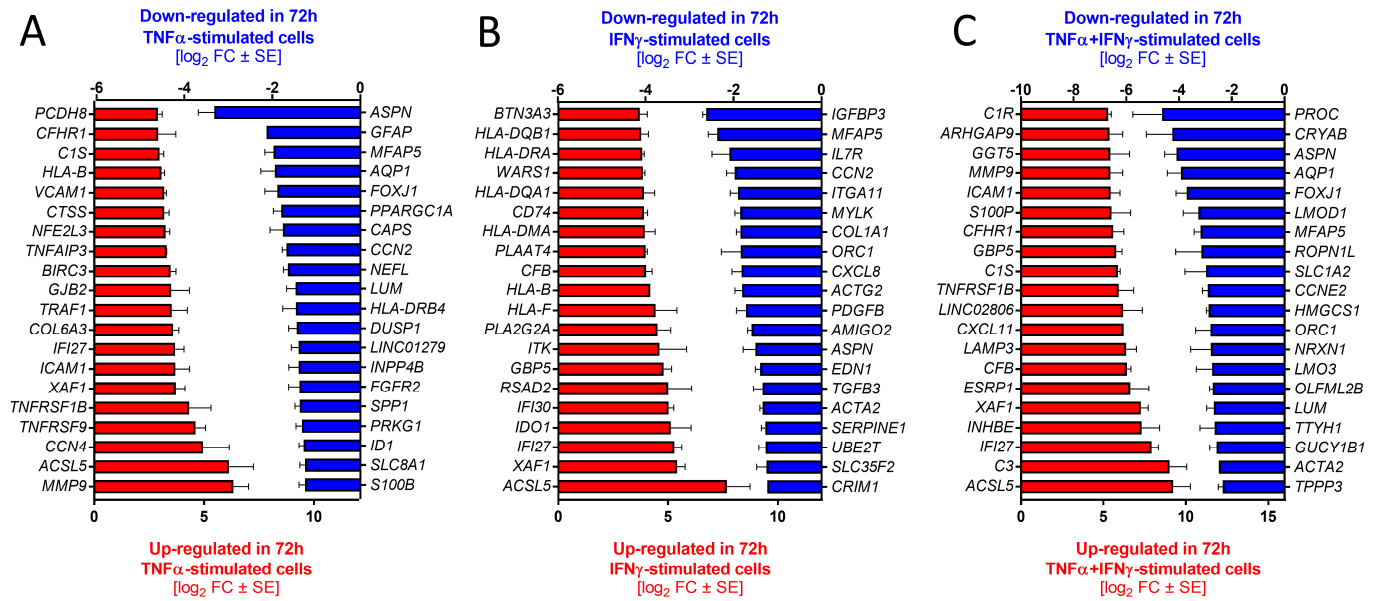

**Figure S15. Response of ACs to cytokines upon stimulation for 72 h.** ACs were seeded at a density of 50,000 cells/cm<sup>2</sup> into 96-well plates. On the next day, cells were stimulated with TNF $\alpha$  (10 ng/ml), IFN $\gamma$  (20 ng/ml) or the combination of TNF $\alpha$  (10 ng/ml) *plus* IFN $\gamma$  (20 ng/ml). After 72 h, cells were lysed and gene expression profiling was performed for 3562 genes. Bar graphs depicting the top 20 up-regulated genes in (A) TNF $\alpha$  stimulated AC, (B) IFN $\gamma$  stimulated AC and (C) TNF $\alpha$  *plus* IFN $\gamma$  co-stimulated AC. Data are means  $\pm$  SE, n=4.



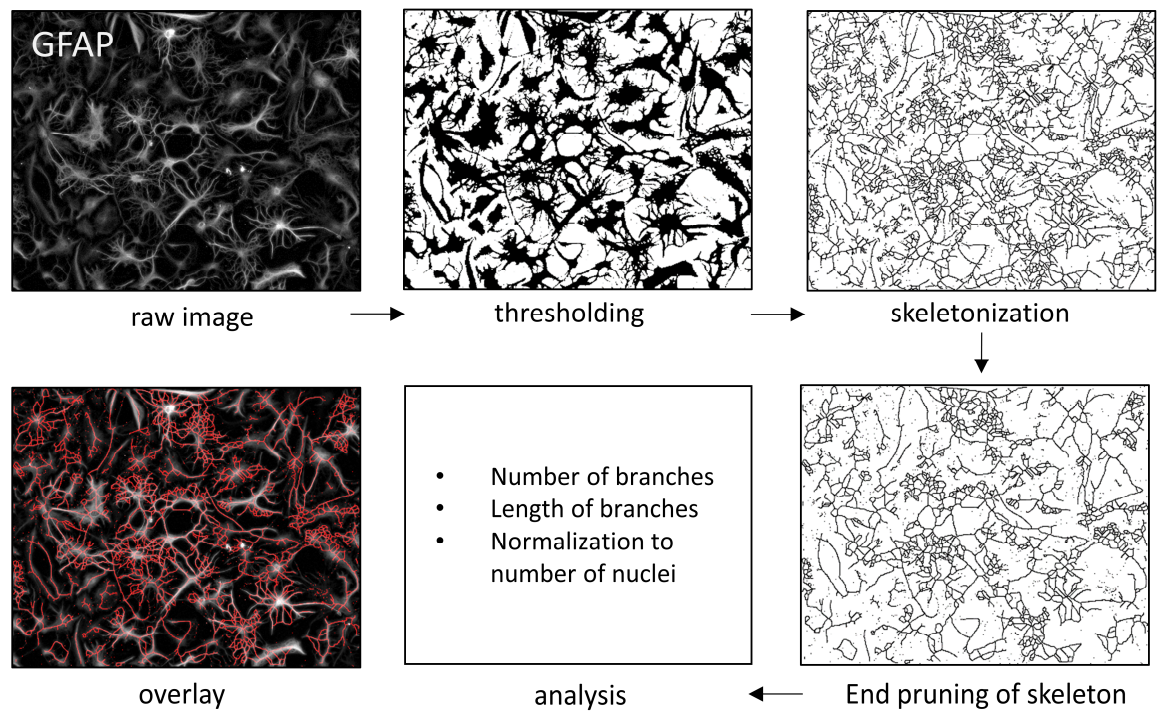

**Figure S16. Schematic workflow for the quantification of morphological changes in AC stimulated with cytokines.** For quantification of astrocyte morphology after inflammatory stimulation, images of immunostained astrocytes (GFAP, H-33342) were analysed with FIJI (version 1.53f51). Images were background corrected and enhanced with a decreased gamma value. The minimum pixel value was increased until cell-free areas appeared as black ("corrected image"). To obtain binary images, images were then auto-thresholded ("thresholding"). Binary images of the GFAP channel were iteratively reduced to lines with FIJI's built-in "skeletonize" function ("skeletonization"). Skeletons were pruned to avoid overestimation of branching of cells without distinct processes ("End pruning of skeleton"). The skeletonized images were analysed with the built-in "analyze skeleton" function. To obtain the number of cells per field, binary images of the H-33342-channel were analysed. Particles  $>10 \mu\text{m}^2$  were counted as nuclei. The total length of branches and the number of branches in each field was normalized to the number of nuclei of the respective field. The bottom left panel shows the skeletonized images over the corrected image.

**Table S1. Additional information on differentiation**

|                                                | Growth Morphology                                                                                                                                                                                                                                                                                                                                                                                                                                                                                                                                                                                                                                                                                                                                                                                                                               | Seeding density for culture                                                                                                                                                                                                                                       | Seeding density for differentiation                          | Proliferation rate                                                         | Use period                                                                                                                  |
|------------------------------------------------|-------------------------------------------------------------------------------------------------------------------------------------------------------------------------------------------------------------------------------------------------------------------------------------------------------------------------------------------------------------------------------------------------------------------------------------------------------------------------------------------------------------------------------------------------------------------------------------------------------------------------------------------------------------------------------------------------------------------------------------------------------------------------------------------------------------------------------------------------|-------------------------------------------------------------------------------------------------------------------------------------------------------------------------------------------------------------------------------------------------------------------|--------------------------------------------------------------|----------------------------------------------------------------------------|-----------------------------------------------------------------------------------------------------------------------------|
| NESC                                           | Cells gather in colonies. Some spontaneously differentiated neurons can be detected especially on the borders of the colonies                                                                                                                                                                                                                                                                                                                                                                                                                                                                                                                                                                                                                                                                                                                   | 20-40 <i>k</i> NESC/cm <sup>2</sup> for culture; passaging after 3-4 days                                                                                                                                                                                         | 50 <i>k</i> NESC/ cm <sup>2</sup> for differentiation to APC | High: 6-8-fold within 4 days                                               | Frozen in P3 (day 25 of differentiation from iPSC) [2, 3]<br><br>P3-P10 can be used for differentiation to APC*             |
| APC                                            | Cells are evenly distributed across the well, do not gather in colonies compared to NESC, can get confluent                                                                                                                                                                                                                                                                                                                                                                                                                                                                                                                                                                                                                                                                                                                                     | 20 <i>k</i> APC/cm <sup>2</sup> for passaging after 4 days; 40 <i>k</i> APC/cm <sup>2</sup> for passaging after 3 days                                                                                                                                            | 20-50 <i>k</i> APC/cm <sup>2</sup> for differentiation to AC | High: 6-fold within 4 days, 3-fold within 3 days                           | APC are suitable for AC differentiation already from day 11 – 18*. Can be frozen on day 7 and thawed for AC differentiation |
| AC                                             | Cells are evenly distributed across the well; form “networks”                                                                                                                                                                                                                                                                                                                                                                                                                                                                                                                                                                                                                                                                                                                                                                                   | 100 <i>k</i> AC/cm <sup>2</sup> until day 35 of differentiation.<br><br>After d35: 60 <i>k</i> AC/cm <sup>2</sup> or less to accelerate proliferation rate and to increase the amount of cells for further experiments.<br><br>Passaging is performed once a week |                                                              | Low: less than 2-fold per week. Can be further reduced by serum-withdrawal | Have been cultured up to 100 days                                                                                           |
| <i>k</i> = Kilo = 10 <sup>3</sup>              |                                                                                                                                                                                                                                                                                                                                                                                                                                                                                                                                                                                                                                                                                                                                                                                                                                                 | P = Passage                                                                                                                                                                                                                                                       |                                                              | *might need adaptations for different iPSC lines                           |                                                                                                                             |
| Critical Steps for AC differentiation/ culture | <ul style="list-style-type: none"><li>AC need some cell-cell contact, especially in the first 5 weeks of differentiation from APC</li><li>Proliferation rate gets lower as a sign of successful differentiation:</li><li>2.5-fold (doubling in one week) in the first 2 weeks of differentiation, 1.5 to 2-fold doubling from day 14 to d 21, 1.2-fold on d 35</li><li>Stable or rising proliferation rates indicate wrong differentiation!</li><li>AC (d 35) stain homogeneously positive for CD44, VIM, S100B; majority (&gt;85%) stain positive for GFAP.</li></ul>                                                                                                                                                                                                                                                                          |                                                                                                                                                                                                                                                                   |                                                              |                                                                            |                                                                                                                             |
| Non-critical steps for AC differentiation      | <ul style="list-style-type: none"><li>APC can be frozen on day 7 or be amplified for up to 5 passages before AC differentiation</li><li>Frozen/thawed APC can be used for AC differentiation</li><li>start of AC differentiation with 20 - 50 <i>k</i> APC/cm<sup>2</sup> possible, resulting in similar marker expression on day 35 of AC differentiation</li><li>Small cell aggregates can be detected while splitting. They can be dissolved by longer incubation time with Accutase or by using a cell strainer to achieve single cells only; it might be necessary to have defined cell densities for experiments</li><li>The content of serum in the medium can be reduced to 0% for experiments (after 35 days of differentiation from APC), co-cultivation of AC with neurons in neuronal medium (0% serum) is also possible.</li></ul> |                                                                                                                                                                                                                                                                   |                                                              |                                                                            |                                                                                                                             |



Table S2. Comparison of markers with TIC-induced astrocytes.

| TIC-induced reactive AC marker<br>(Labib et al. [4]) | Treatment condition |              |                             |
|------------------------------------------------------|---------------------|--------------|-----------------------------|
|                                                      | TNF $\alpha$        | IFN $\gamma$ | TNF $\alpha$ + IFN $\gamma$ |
| IFI6                                                 | +                   | +            | +                           |
| MX1                                                  | +                   | +            | +                           |
| ICAM1                                                | +                   | +            | +                           |
| GBP1                                                 | +                   | +            | +                           |
| IFIT1                                                | +                   | +            | +                           |
| IFIT3                                                | +                   | +            | +                           |
| HLA-F                                                | +                   | +            | +                           |
| CTSS                                                 | +                   | +            | +                           |
| IFIT2                                                | +                   | +            | +                           |
| CXCL11                                               | +                   | +            | +                           |
| ISG15                                                | +                   | +            | +                           |
| C1R                                                  | +                   | +            | +                           |
| WARS1                                                | +                   | +            | +                           |
| STAT1                                                | +                   | +            | +                           |
| OAS1                                                 | +                   | +            | +                           |
| C15orf48                                             | +                   | -            | +                           |
| SOD2                                                 | +                   | -            | +                           |
| CCL2                                                 | +                   | -            | +                           |
| TNFAIP2                                              | +                   | -            | +                           |
| TRAF1                                                | +                   | -            | +                           |
| CXCL1                                                | +                   | -            | +                           |
| CCL5                                                 | +                   | -            | +                           |
| CYP1B1                                               | +                   | -            | +                           |
| PHOSPHO1                                             | -                   | -            | -                           |

**Table S3. Overview of genes uniquely differentially expressed (DEGs) in ACs stimulated with cytokines for 72 h**

| Condition                                                                                                   | Number of DEGs | Names of DEGs                                                                                                                                                                                                                                                                                                                                                                                                                                                                                                                                                                                                                                                                                                                                                                                                                                                                                                                                                                                                                                                                                                                                                                                          |
|-------------------------------------------------------------------------------------------------------------|----------------|--------------------------------------------------------------------------------------------------------------------------------------------------------------------------------------------------------------------------------------------------------------------------------------------------------------------------------------------------------------------------------------------------------------------------------------------------------------------------------------------------------------------------------------------------------------------------------------------------------------------------------------------------------------------------------------------------------------------------------------------------------------------------------------------------------------------------------------------------------------------------------------------------------------------------------------------------------------------------------------------------------------------------------------------------------------------------------------------------------------------------------------------------------------------------------------------------------|
| IFN $\gamma$ only                                                                                           | 25             | <i>BBOX1, NPTX2, CEBPD, ST6GALNAC2, SULF1, HLA-DMB, MAP7, A2M, PLA2G2A, TPPP3, RGPDI, IFIT1, ITK, HLA-DPB1, CLU, HLA-DRB3, SOCS3, SEMA4B, CA2, PSRC1, PIFO, SEMA6A, PRPH, TMED10, GFAP</i>                                                                                                                                                                                                                                                                                                                                                                                                                                                                                                                                                                                                                                                                                                                                                                                                                                                                                                                                                                                                             |
| TNF $\alpha$ only                                                                                           | 9              | <i>LEF1, BMF, TGFB3, ROBO1, JUNB, PODXL, NRIP1, FN1, ITGA4</i>                                                                                                                                                                                                                                                                                                                                                                                                                                                                                                                                                                                                                                                                                                                                                                                                                                                                                                                                                                                                                                                                                                                                         |
| TNF $\alpha$ +IFN $\gamma$ combined treatment                                                               | 162            | <i>MTIG, ESRP1, PSMA4, CSTA, ITGA5, RGS2, SUPV3L1, PTPRK, H2BC12, IARS1, AEN, KCNG1, PLAU, MTHFD2, CXCL3, SQOR, FTH1, TP53, GDF15, GFPT1, HMOX1, C1RL, GRB10, PPP1R15A, P4HA2, S100P, C15orf48, ADGRL4, TRIB3, STXBP2, FUT1, IGF2BP2, MET, GOT1, CARS1, SLC38A1, BBC3, AMY2B, ARHGAP9, NAMPT, IRF7, SHC1, MAP1LC3B, HERPUD1, CDC25B, PRELID3B, PTPN12, CCND2, CBX4, NFKBIZ, CXCL6, HS6ST2, SRXN1, ADM, GADD45A, SQSTM1, PHGDH, AARS1, INA, H1-0, RAB27A, ZNF274, POU5F1, AIFM2, SELL, MDM2, EIF2S2, OSGIN1, LINC00623, ITGB3, HSPA9, IL1B, NEFH, CDK13, STC2, ATF5, CTH, USP18, H2BC21, C3, DDIT3, SLC1A4, DDR2, PSAT1, SOD3, ZFAND2A, ABCA1, LAMP3, HSPA5, TNFSF13B, PLIN2, ENOSF1, GCLM, IGFBP4, TREM1, SLC2A3, TRIB1, EPSTI1, SEPHS2, FGF2, PTX3, SLIT2, ODF3B, IFRD2, TRIM16L, VEGFA, THRB, BCAT1, ASS1, SLC7A11, AREG, CASP4, EDNRA, TTC4, TES, MYC, JADE2, LINC02806, NR0B1, NRG1, TXNRD1, SLC30A1, TSC22D3, ARHGEF2, CASP8, RAB11FIP2, RASSF5, SESN2, WNT7B, SHB, ETS1, SLC3A2, ASNS, DENND2D, SNHG8, NFIL3, ATF4, MAFF, LY96, IFRD1, TNFRSF10B, PAPP4, IKBKE, PRNP, FOSL1, NNMT, MTIM, MMP1, GGT5, MAL2, EDEM1, SCN9A, HDAC9, INHBE, CHAC1, NMRAL2P, XBP1, AHR, NFKBIB, PVR, SYTL1, EEF1A2</i> |
| Overlapping DEGs between TNF $\alpha$ and combined treatment with TNF $\alpha$ +IFN $\gamma$                | 39             | <i>LICAM, BID, VCAM1, RELB, SOD2, TNFAIP2, NFKBIE, CXCL5, IRAK2, COL6A3, CCN4, CXCL2, CLDN1, NFKB1, TNFRSF9, DUSP4, KITLG, NFKBIA, TNFSF10, NFKB2, NFE2L3, CEBPB, GJB2, ICAM1, TNFRSF1B, PCDH8, CXCL1, TNFAIP3, STAP2, CCL2, TRAF1, TPBG, CXCL8, COL16A1, TNIP1, HMGA2, BIRC3, MMP9, STEAP1</i>                                                                                                                                                                                                                                                                                                                                                                                                                                                                                                                                                                                                                                                                                                                                                                                                                                                                                                        |
| Overlapping DEGs between IFN $\gamma$ and combined treatment with TNF $\alpha$ +IFN $\gamma$                | 48             | <i>ERC5, HLA-F, IDO1, RSAD2, WARS1, HLA-DMA, HLA-DRB1, HLA-DRB4, IFITM3, HLA-DRB5, NRP1, TRIM22, DDX60, CMPK2, SERPINE2, SP110, IFI6, HERC6, LAP3, SAMHD1, NLRC5, H2AC6, HLA-E, IL15, IFI44L, CSF1, DTX3L, GBP1, CD74, PLSCR1, HLA-DRA, MDK, PSME2, IFITM1, CXCL9, TAP1, ISG20, BTN3A3, TXNIP, UBE2L6, STAT1, HLA-DQA1, HLA-DQB1, IFI44, PARP14, ISG15, IFIT2, IFITM2</i>                                                                                                                                                                                                                                                                                                                                                                                                                                                                                                                                                                                                                                                                                                                                                                                                                              |
| Overlapping DEGs between TNF $\alpha$ , IFN $\gamma$ and combined treatment with TNF $\alpha$ +IFN $\gamma$ | 30             | <i>CIS, C1R, CTSS, OAS1, MX1, IRF1, PLAAT4, HLA-B, SAMD9L, HLA-A, CFB, CASP1, APOBEC3G, XAF1, B2M, CFHR1, BTN3A2, HLA-C, GBP5, ACSL5, IFI30, PSMB8, MT2A, CFH, CXCL11, TAPBP, PSME1, PSMB9, IFIT3, IFI27</i>                                                                                                                                                                                                                                                                                                                                                                                                                                                                                                                                                                                                                                                                                                                                                                                                                                                                                                                                                                                           |

Table S4. Overview and exact significance numbers of top 20 deregulated transcription factors (72 h) [1]

| Gene set | Description          | IFN $\gamma$ | p-values (Log10) |                            |
|----------|----------------------|--------------|------------------|----------------------------|
|          |                      |              | TNF $\alpha$     | TNF $\alpha$ +IFN $\gamma$ |
| TRR01275 | Regulated by: STAT1  | -8,9         | -8,3             | -16,7                      |
| TRR01277 | Regulated by: STAT3  | -5,9         | -8,0             | -16,3                      |
| TRR00602 | Regulated by: IRF1   | -7,5         | -10,0            | -10,2                      |
| TRR00875 | Regulated by: NFKB1  | -8,7         | -24,3            | -34,0                      |
| TRR01158 | Regulated by: RELA   | -8,8         | -24,5            | -34,3                      |
| TRR00117 | Regulated by: CIITA  | -28,0        | -7,5             | -17,5                      |
| TRR00489 | Regulated by: HIVP2  | -11,6        | -6,5             | -9,4                       |
| TRR01167 | Regulated by: RFXAP  | -21,0        | 0,0              | -10,3                      |
| TRR01166 | Regulated by: RFXANK | -21,0        | 0,0              | -10,3                      |
| TRR01165 | Regulated by: RFX5   | -19,9        | 0,0              | -9,6                       |
| TRR00645 | Regulated by: JUN    | 0,0          | -7,8             | -17,0                      |
| TRR01256 | Regulated by: SP1    | 0,0          | -6,0             | -13,0                      |
| TRR00877 | Regulated by: NFKBIA | 0,0          | -10,9            | -11,1                      |
| TRR01157 | Regulated by: REL    | 0,0          | -8,2             | -6,9                       |
| TRR01538 | Regulated by: XBP1   | 0,0          | -4,7             | -9,3                       |
| TRR00466 | Regulated by: HDAC1  | 0,0          | -5,7             | -10,9                      |
| TRR00025 | Regulated by: ATF4   | 0,0          | -4,0             | -21,2                      |
| TRR01419 | Regulated by: TP53   | 0,0          | 0,0              | -11,1                      |
| TRR00075 | Regulated by: BRCA1  | 0,0          | 0,0              | -11,2                      |
| TRR01062 | Regulated by: PPARG  | 0,0          | 0,0              | -9,9                       |

Table S5. Overview and exact significance numbers of top 20 enriched gene sets (72 h) [1].

| Pathway       | Description                                 | p-values (Log10) |              |                            |
|---------------|---------------------------------------------|------------------|--------------|----------------------------|
|               |                                             | IFN $\gamma$     | TNF $\alpha$ | TNF $\alpha$ +IFN $\gamma$ |
| WP254         | Apoptosis                                   | 0,0              | -13,7        | -20,4                      |
| R-HSA-8953897 | Cellular responses to stimuli               | 0,0              | -6,2         | -23,2                      |
| GO:0097190    | apoptotic signaling pathway                 | 0,0              | -8,5         | -17,8                      |
| WP5087        | Malignant pleural mesothelioma              | 0,0              | -7,9         | -16,1                      |
| WP4754        | IL-18 signaling pathway                     | 0,0              | -24,5        | -23,5                      |
| WP4925        | Unfolded protein response                   | 0,0              | 0,0          | -17,9                      |
| R-HSA-449147  | Signaling by Interleukins                   | -5,4             | -18,6        | -22,0                      |
| GO:0009617    | response to bacterium                       | -6,6             | -19,4        | -26,6                      |
| WP5088        | Prostaglandin signaling                     | -3,7             | -9,6         | -17,9                      |
| GO:0002521    | leukocyte differentiation                   | -6,5             | -7,8         | -14,3                      |
| GO:0016032    | viral process                               | -14,4            | -8,0         | -17,4                      |
| WP619         | Type II interferon signaling (IFNG)         | -20,7            | -7,4         | -17,1                      |
| GO:0050778    | positive regulation of immune response      | -23,9            | -5,6         | -15,3                      |
| R-HSA-1280218 | Adaptive Immune System                      | -26,8            | -11,1        | -19,9                      |
| ko04612       | Antigen processing and presentation         | -38,6            | -10,6        | -24,7                      |
| R-HSA-1280215 | Cytokine Signaling in Immune system         | -47,9            | -37,0        | -58,8                      |
| GO:0031347    | regulation of defense response              | -18,0            | -11,3        | -21,3                      |
| GO:0019221    | cytokine-mediated signaling pathway         | -13,4            | -15,7        | -25,8                      |
| WP5115        | Network map of SARS-CoV-2 signaling pathway | -16,3            | -20,0        | -26,7                      |
| GO:0001817    | regulation of cytokine production           | -15,6            | -10,8        | -16,7                      |

Table S6. Overview of primers used for real-time qPCR.

| Target | Sequence (For)              | Sequence (Rev)           |
|--------|-----------------------------|--------------------------|
| GFAP   | CGAGATCGCCACCTACAGGAAGC     | CCTTAATGACCTCTCCATCCCGC  |
| S100B  | CTTAGAGGAAATCAAAGAGCAGGAGGT | CATGTTCAAAGAACTCGTGGCAGG |
| SOX9   | AGGAAGCTCGCGGACCAGTA        | CTGCCC GTTCTTCACCGACT    |
| MAO-B  | CTCTGGGGGCTGCTACACAAC       | CAGGGACATCCACAGACTCTGG   |
| NFIA   | CCCAGCACATCCTCTACGAG        | AGGGGCTGCTGAAACCAGAC     |
| AQP4   | AACCCTGCAGTGACTGTGGC        | CAGGAGACCATGACCAGCGG     |
| CD44   | AGCATCGGATTGAGACCTG         | GTTGTTTGCTGCACAGATGG     |
| A2M    | GAGGCGGAGAATGACGTACT        | TCTTGGGTTGGTCCTTTCAC     |
| PGK1   | GATGGGCTTGGA CTGTGGTC       | ACAGCAAGTGGCAGTGTCTCC    |
| RPL13A | GGTATGCTGCCCCACAAAACC       | CTGTCACTGCCTGGTACTTCCA   |

Table S7. Antibodies used for immunofluorescent staining.

| Target                                          | Species    | Dilution | Supplier           | Catalogue number |
|-------------------------------------------------|------------|----------|--------------------|------------------|
| <b>Primary</b>                                  |            |          |                    |                  |
| AQP4                                            | Rabbit     | 1:200    | Santa Cruz         | sc-20812         |
| NESTIN                                          | Mouse IgG1 | 1:200    | R&D Systems        | MAB1259          |
| CD44                                            | Rat        | 1:200    | eBioscience/Thermo |                  |
| GFAP                                            | Chicken    | 1:1000   | Merck Millipore    | AB5541           |
| MAO-B                                           | Rabbit     | 1:200    | Sigma              | HPA002328        |
| NFkB p65                                        | Rabbit     | 1:200    | BioLegend          | 901301           |
| S100B                                           | mouse IgG1 | 1:200    | Sigma              | S 2532           |
| VIMENTIN                                        | Rabbit     | 1:200    | Abcam              | Ab92547          |
| <b>Secondary</b>                                |            |          |                    |                  |
| Goat anti-Rat IgG (H+L), Alexa Fluor™ 647       |            | 1:1000   | Invitrogen         | A-21247          |
| Goat anti-Rat IgG (H+L), Alexa Fluor™ 555       |            | 1:1000   | Invitrogen         | A-21434          |
| Goat anti-Rat IgG (H+L), Alexa Fluor™ 488       |            | 1:1000   | Invitrogen         | A-11006          |
| Goat anti-Chicken IgY (H+L), Alexa Fluor™ 647   |            | 1:1000   | Invitrogen         | A-21449          |
| Goat anti-Chicken IgY (H+L), Alexa Fluor™ 555   |            | 1:1000   | Invitrogen         | A-21437          |
| Goat anti-Chicken IgY (H+L), Alexa Fluor™ 488   |            | 1:1000   | Invitrogen         | A-11039          |
| Goat anti-Mouse IgG1, Alexa Fluor™ 647          |            | 1:1000   | Invitrogen         | A-21240          |
| Goat anti-Mouse IgG1, Alexa Fluor™ 555          |            | 1:1000   | Invitrogen         | A-21127          |
| Goat anti-Mouse IgG1, Alexa Fluor™ 488          |            | 1:1000   | Invitrogen         | A-21121          |
| Donkey anti-Rabbit IgG (H+L), Alexa Fluor™ 647  |            | 1:1000   | Invitrogen         | A-31573          |
| Goat anti-Rabbit IgG (H+L), Alexa Fluor™ 555    |            | 1:1000   | Invitrogen         | A-21428          |
| Chicken anti-Rabbit IgG (H+L), Alexa Fluor™ 488 |            | 1:1000   | Invitrogen         | A-21441          |

**Table S8. Antibodies used for western blot.**

| <b>Target</b>    | <b>Species</b>                  | <b>Dilution</b> | <b>Supplier</b>         | <b>Catalogue number</b> |
|------------------|---------------------------------|-----------------|-------------------------|-------------------------|
| <b>Primary</b>   |                                 |                 |                         |                         |
| P-STAT3 (Tyr705) | Rabbit                          | 1:1000          | Cell signaling          | 9145P                   |
| P-STAT1 (Tyr701) | Rabbit                          | 1:1000          | Cell signaling          | 7649S                   |
| GAPDH            | Mouse                           | 1:5000          | Abcam                   | Ab8245                  |
| <b>Secondary</b> |                                 |                 |                         |                         |
| Mouse            | Goat anti-mouse HRP antibody    | 1:2500          | Jackson Immuno Research | 115-035-174             |
| Rabbit           | Donkey anti-rabbit HRP antibody | 1:5000          | GE Healthcare           | NA934v                  |

## References

1. Zhou, Y., Zhou, B., Pache, L., Chang, M., Khodabakhshi, A. H., Tanaseichuk, O., Benner, C. and Chanda, S. K. Metascape provides a biologist-oriented resource for the analysis of systems-level datasets. *Nat Commun* **2019**, *10*, 1523 doi: 10.1038/s41467-019-09234-6.
2. Reinhardt, P., Glatza, M., Hemmer, K., Tsytsyura, Y., Thiel, C. S., Hoing, S., Moritz, S., Parga, J. A., Wagner, L., Bruder, J. M., Wu, G., Schmid, B., Ropke, A., Klingauf, J., Schwamborn, J. C., Gasser, T., Scholer, H. R. and Sternecker, J. Derivation and expansion using only small molecules of human neural progenitors for neurodegenerative disease modeling. *PLoS One* **2013**, *8*, e59252 doi: 10.1371/journal.pone.0059252.
3. Klima, S., Brull, M., Spreng, A. S., Suciu, I., Falt, T., Schwamborn, J. C., Waldmann, T., Karreman, C. and Leist, M. A human stem cell-derived test system for agents modifying neuronal N-methyl-D-aspartate-type glutamate receptor Ca(2+)-signalling. *Arch Toxicol* **2021**, *95*, 1703-1722 doi: 10.1007/s00204-021-03024-0.
4. Labib, D., Wang, Z., Prakash, P., Zimmer, M., Smith, M. D., Frazel, P. W., Barbar, L., Sapor, M. L., Calabresi, P. A., Peng, J., Liddelow, S. A. and Fossati, V. Proteomic Alterations and Novel Markers of Neurotoxic Reactive Astrocytes in Human Induced Pluripotent Stem Cell Models. *Front Mol Neurosci* **2022**, *15*, 870085 doi: 10.3389/fnmol.2022.870085.
