# Supplementary material for: Distinct and Dynamic Transcriptome Adaptations of iPSC-Generated Astrocytes after Cytokine Stimulation
Source: Cells. 2022 Aug 25;11(17):2644. doi: 10.3390/cells11172644 (PMC9455058; doi:10.3390/cells11172644)
Supplement: Supplementary file 1 [file cells-11-02644-s001.zip › Spreng et al., 2022, Supplementary workbook.xlsx]

## Sheet: Table of contents
Table of Content
This excel file consists of all together 9 sheets:																		Explanation of abbreviations used as column headers in Sheet 3-9
	Sheet 1		Table of Content															-	baseMean:			mean of normalized counts for all compared samples
	Sheet 2		Suppl. Table S1 - Metadata of the measured samples															-	log2FoldChange:			log2 fold change of expression: condition A vs condition B
	Sheet 3		Suppl. Table S2 - raw counts of targeted transcriptome analysis (Temp-O-Seq method)															-	lfcSE:			standard error of the log2 fold change (translates to fold change as 2^(log2FC±lfcSE) )
	Sheet 4		Suppl. Table S3 - differentially expressed genes of Astrocytes vs. NESC															-	stat:			Wald statistic: Log2FC divided by its standard error
	Sheet 5		Suppl. Table S4 - differentially expressed genes of Astrocytes vs. APS															-	pvalue:			Wald test p-value: condition A vs condition B
	Sheet 6		Suppl. Table S5 - differentially expressed genes of Astrocytes treated with LPS															-	padj:			Benjamini-Hochberg corrected adjusted p-values
	Sheet 7		Suppl. Table S6 - differentially expressed genes of Astrocytes treated with TNFa
	Sheet 8		Suppl. Table S7 - differentially expressed genes of Astrocytes treated with INFy
	Sheet 9		Suppl. Table S8 - differentially expressed genes of Astrocytes treated with TNFa and INFy
•	Supplementary Table S1
		Metadata of measured samples
			displayed are:
		-	Sample_ID: unique identifier of the measured sample
		-	Celltype: The type of measured cell (AC = astrocytes, APC = astrocyte precursor cells, NESC = neuro-epithelial stem cells)
		-	Treatment: Type of treatment the cells recieved. "ctrl" refers to a solvent control
		-	Duration: Time of exposure to the cytokines. Untreated samples were treated for 0 h.
		-	Replicate: Descriptor of replicate
•	Supplementary Table S2
		Raw count data of all analyzed samples
		-	Data was generated by targeted transcriptome analysis (Temp-O-Seq method)
		-	A total of 4041 unique probes were used to analyze the expression of 3562 unique genes
•	Supplementary Table S3
		Differentially expressed genes of astrocytes when compared to NESC
		-	significantly regulated genes (Benjamini-Hochberg false discovery rate (FDR) padj<0.05, Log2FC > 0.5)
		-	DEG analysis was performed with DESeq 2
•	Supplementary Table S4
		Differentially expressed genes of astrocytes when compared to APC
		-	significantly regulated genes (Benjamini-Hochberg false discovery rate (FDR) padj<0.05, Log2FC > 0.5)
		-	DEG analysis was performed with DESeq 2
•	Supplementary Table S5
		Differentially expressed genes of astrocytes treated with LPS vs. untreated
		-	significantly regulated genes (Benjamini-Hochberg false discovery rate (FDR) padj<0.05, Log2FC > 0.5)
		-	DEG analysis was performed with DESeq 2
		-	timepoints: 8 h, 24 h
•	Supplementary Table S6
		Differentially expressed genes of astrocytes treated with TNFa vs. untreated
		-	significantly regulated genes (Benjamini-Hochberg false discovery rate (FDR) padj<0.05, Log2FC > 0.5)
		-	DEG analysis was performed with DESeq 2
		-	timepoints: 2 h, 4 h, 8 h, 12 h, 18 h, 24 h, 72 h
•	Supplementary Table S7
		Differentially expressed genes of astrocytes treated with vs. untreated
		-	significantly regulated genes (Benjamini-Hochberg false discovery rate (FDR) padj<0.05, Log2FC > 0.5)
		-	DEG analysis was performed with DESeq 2
		-	timepoints: 2 h, 4 h, 8 h, 12 h, 18 h, 24 h, 72 h
•	Supplementary Table S8
		Differentially expressed genes of astrocytes treated with TNFa and INFy vs. untreated
		-	significantly regulated genes (Benjamini-Hochberg false discovery rate (FDR) padj<0.05, Log2FC > 0.5)
		-	DEG analysis was performed with DESeq 2
		-	timepoints: 2 h, 4 h, 8 h, 12 h, 18 h, 24 h, 72 h

## Sheet: Suppl. Table S1
Sample_ID	Celltype	Treatment	Duration	Replicate
S_Aa_ctr_N1a	AC	ctrl	0 h	N1a
S_Aa_ctr_N1b	AC	ctrl	0 h	N1b
S_Aa_IFN_12h_N1a	AC	IFN	12 h	N1a
S_Aa_IFN_12h_N1b	AC	IFN	12 h	N1b
S_Aa_IFN_18h_N1a	AC	IFN	18 h	N1a
S_Aa_IFN_18h_N1b	AC	IFN	18 h	N1b
S_Aa_IFN_24h_N1a	AC	IFN	24 h	N1a
S_Aa_IFN_24h_N1b	AC	IFN	24 h	N1b
S_Aa_IFN_2h_N1a	AC	IFN	2 h	N1a
S_Aa_IFN_2h_N1b	AC	IFN	2 h	N1b
S_Aa_IFN_3d_N1a	AC	IFN	72 h	N1a
S_Aa_IFN_3d_N1b	AC	IFN	72 h	N1b
S_Aa_IFN_4h_N1a	AC	IFN	4 h	N1a
S_Aa_IFN_4h_N1b	AC	IFN	4 h	N1b
S_Aa_IFN_8h_N1a	AC	IFN	8 h	N1a
S_Aa_IFN_8h_N1b	AC	IFN	8 h	N1b
S_Aa_LPS_24h_N1a	AC	LPS	24 h	N1a
S_Aa_LPS_24h_N1b	AC	LPS	24 h	N1b
S_Aa_LPS_8h_N1a	AC	LPS	8 h	N1a
S_Aa_LPS_8h_N1b	AC	LPS	8 h	N1b
S_Aa_TNF_12h_N1a	AC	TNF	12 h	N1a
S_Aa_TNF_12h_N1b	AC	TNF	12 h	N1b
S_Aa_TNF_18h_N1a	AC	TNF	18 h	N1a
S_Aa_TNF_18h_N1b	AC	TNF	18 h	N1b
S_Aa_TNF_24h_N1a	AC	TNF	24 h	N1a
S_Aa_TNF_24h_N1b	AC	TNF	24 h	N1b
S_Aa_TNF_2h_N1a	AC	TNF	2 h	N1a
S_Aa_TNF_2h_N1b	AC	TNF	2 h	N1b
S_Aa_TNF_3d_N1a	AC	TNF	72 h	N1a
S_Aa_TNF_3d_N1b	AC	TNF	72 h	N1b
S_Aa_TNF_4h_N1a	AC	TNF	4 h	N1a
S_Aa_TNF_4h_N1b	AC	TNF	4 h	N1b
S_Aa_TNF_8h_N1a	AC	TNF	8 h	N1a
S_Aa_TNF_8h_N1b	AC	TNF	8 h	N1b
S_Aa_TNFIFN_12h_N1a	AC	TNFIFN	12 h	N1a
S_Aa_TNFIFN_12h_N1b	AC	TNFIFN	12 h	N1b
S_Aa_TNFIFN_18h_N1a	AC	TNFIFN	18 h	N1a
S_Aa_TNFIFN_18h_N1b	AC	TNFIFN	18 h	N1b
S_Aa_TNFIFN_24h_N1a	AC	TNFIFN	24 h	N1a
S_Aa_TNFIFN_24h_N1b	AC	TNFIFN	24 h	N1b
S_Aa_TNFIFN_2h_N1a	AC	TNFIFN	2 h	N1a
S_Aa_TNFIFN_2h_N1b	AC	TNFIFN	2 h	N1b
S_Aa_TNFIFN_3d_N1a	AC	TNFIFN	72 h	N1a
S_Aa_TNFIFN_3d_N1b	AC	TNFIFN	72 h	N1b
S_Aa_TNFIFN_4h_N1a	AC	TNFIFN	4 h	N1a
S_Aa_TNFIFN_4h_N1b	AC	TNFIFN	4 h	N1b
S_Aa_TNFIFN_8h_N1a	AC	TNFIFN	8 h	N1a
S_Aa_TNFIFN_8h_N1b	AC	TNFIFN	8 h	N1b
S_Ab_ctr_N2a	AC	ctrl	0 h	N2a
S_Ab_ctr_N2b	AC	ctrl	0 h	N2b
S_Ab_IFN_12h_N2a	AC	IFN	12 h	N2a
S_Ab_IFN_12h_N2b	AC	IFN	12 h	N2b
S_Ab_IFN_18h_N2a	AC	IFN	18 h	N2a
S_Ab_IFN_18h_N2b	AC	IFN	18 h	N2b
S_Ab_IFN_24h_N2a	AC	IFN	24 h	N2a
S_Ab_IFN_24h_N2b	AC	IFN	24 h	N2b
S_Ab_IFN_2h_N2a	AC	IFN	2 h	N2a
S_Ab_IFN_2h_N2b	AC	IFN	2 h	N2b
S_Ab_IFN_3d_N2a	AC	IFN	72 h	N2a
S_Ab_IFN_3d_N2b	AC	IFN	72 h	N2b
S_Ab_IFN_4h_N2a	AC	IFN	4 h	N2a
S_Ab_IFN_4h_N2b	AC	IFN	4 h	N2b
S_Ab_IFN_8h_N2a	AC	IFN	8 h	N2a
S_Ab_IFN_8h_N2b	AC	IFN	8 h	N2b
S_Ab_LPS_24h_N2a	AC	LPS	24 h	N2a
S_Ab_LPS_24h_N2b	AC	LPS	24 h	N2b
S_Ab_LPS_8h_N2a	AC	LPS	8 h	N2a
S_Ab_LPS_8h_N2b	AC	LPS	8 h	N2b
S_Ab_TNF_12h_N2a	AC	TNF	12 h	N2a
S_Ab_TNF_12h_N2b	AC	TNF	12 h	N2b
S_Ab_TNF_18h_N2a	AC	TNF	18 h	N2a
S_Ab_TNF_18h_N2b	AC	TNF	18 h	N2b
S_Ab_TNF_24h_N2a	AC	TNF	24 h	N2a
S_Ab_TNF_24h_N2b	AC	TNF	24 h	N2b
S_Ab_TNF_2h_N2a	AC	TNF	2 h	N2a
S_Ab_TNF_2h_N2b	AC	TNF	2 h	N2b
S_Ab_TNF_3d_N2a	AC	TNF	72 h	N2a
S_Ab_TNF_3d_N2b	AC	TNF	72 h	N2b
S_Ab_TNF_4h_N2a	AC	TNF	4 h	N2a
S_Ab_TNF_4h_N2b	AC	TNF	4 h	N2b
S_Ab_TNF_8h_N2a	AC	TNF	8 h	N2a
S_Ab_TNF_8h_N2b	AC	TNF	8 h	N2b
S_Ab_TNFIFN_12h_N2a	AC	TNFIFN	12 h	N2a
S_Ab_TNFIFN_12h_N2b	AC	TNFIFN	12 h	N2b
S_Ab_TNFIFN_18h_N2a	AC	TNFIFN	18 h	N2a
S_Ab_TNFIFN_18h_N2b	AC	TNFIFN	18 h	N2b
S_Ab_TNFIFN_24h_N2a	AC	TNFIFN	24 h	N2a
S_Ab_TNFIFN_24h_N2b	AC	TNFIFN	24 h	N2b
S_Ab_TNFIFN_2h_N2a	AC	TNFIFN	2 h	N2a
S_Ab_TNFIFN_2h_N2b	AC	TNFIFN	2 h	N2b
S_Ab_TNFIFN_3d_N2a	AC	TNFIFN	72 h	N2a
S_Ab_TNFIFN_3d_N2b	AC	TNFIFN	72 h	N2b
S_Ab_TNFIFN_4h_N2a	AC	TNFIFN	4 h	N2a
S_Ab_TNFIFN_4h_N2b	AC	TNFIFN	4 h	N2b
S_Ab_TNFIFN_8h_N2a	AC	TNFIFN	8 h	N2a
S_Ab_TNFIFN_8h_N2b	AC	TNFIFN	8 h	N2b
S_NESC_new_n1	NESC	ctrl	0 h	N1
S_NESC_new_n2	NESC	ctrl	0 h	N2
S_NESC_old_n1	NESC	ctrl	0 h	N1
S_NESC_old_n2	NESC	ctrl	0 h	N2
S_NSC_d14_n1	APC	ctrl	0 h	N1
S_NSC_d14_n2	APC	ctrl	0 h	N2
S_NSC_d19_n1	APC	ctrl	0 h	n1
S_NSC_d19_n2	APC	ctrl	0 h	n2

## Sheet: Suppl. Table S2
Probe_ID	S_Aa_ctr_N1a	S_Aa_ctr_N1b	S_Aa_IFN_12h_N1a	S_Aa_IFN_12h_N1b	S_Aa_IFN_18h_N1a	S_Aa_IFN_18h_N1b	S_Aa_IFN_24h_N1a	S_Aa_IFN_24h_N1b	S_Aa_IFN_2h_N1a	S_Aa_IFN_2h_N1b	S_Aa_IFN_3d_N1a	S_Aa_IFN_3d_N1b	S_Aa_IFN_4h_N1a	S_Aa_IFN_4h_N1b	S_Aa_IFN_8h_N1a	S_Aa_IFN_8h_N1b	S_Aa_LPS_24h_N1a	S_Aa_LPS_24h_N1b	S_Aa_LPS_8h_N1a	S_Aa_LPS_8h_N1b	S_Aa_TNF_12h_N1a	S_Aa_TNF_12h_N1b	S_Aa_TNF_18h_N1a	S_Aa_TNF_18h_N1b	S_Aa_TNF_24h_N1a	S_Aa_TNF_24h_N1b	S_Aa_TNF_2h_N1a	S_Aa_TNF_2h_N1b	S_Aa_TNF_3d_N1a	S_Aa_TNF_3d_N1b	S_Aa_TNF_4h_N1a	S_Aa_TNF_4h_N1b	S_Aa_TNF_8h_N1a	S_Aa_TNF_8h_N1b	S_Aa_TNFIFN_12h_N1a	S_Aa_TNFIFN_12h_N1b	S_Aa_TNFIFN_18h_N1a	S_Aa_TNFIFN_18h_N1b	S_Aa_TNFIFN_24h_N1a	S_Aa_TNFIFN_24h_N1b	S_Aa_TNFIFN_2h_N1a	S_Aa_TNFIFN_2h_N1b	S_Aa_TNFIFN_3d_N1a	S_Aa_TNFIFN_3d_N1b	S_Aa_TNFIFN_4h_N1a	S_Aa_TNFIFN_4h_N1b	S_Aa_TNFIFN_8h_N1a	S_Aa_TNFIFN_8h_N1b	S_Ab_ctr_N2a
A2M_1	271	198	983	806	690	675	580	456	574	699	624	575	671	657	551	587	299	293	450	501	276	282	169	174	130	130	693	553	157	144	427	465	314	337	512	695	265	231	324	259	724	572	144	142	822	819	599	633	322
AARS1_3	748	853	906	1008	844	943	599	598	913	930	666	756	554	616	644	619	841	768	667	735	722	749	830	939	659	700	596	422	843	938	496	405	501	582	316	358	397	452	526	469	782	731	2156	2104	476	418	357	325	1088
AATF_4	16	11	18	19	13	9	8	14	6	9	17	19	14	10	7	10	32	6	21	9	20	15	9	21	16	9	5	9	13	16	12	10	11	15	39	36	23	12	8	11	10	13	22	16	14	22	22	23	20
ABCB1_12	7	0	0	0	2	1	2	0	3	0	0	0	0	0	1	0	0	0	2	1	7	1	0	1	1	0	5	2	2	1	4	4	6	0	5	4	3	7	1	1	3	7	0	2	0	5	0	3	0
ABCC2_22	17	20	20	32	21	12	4	14	15	16	15	19	23	11	15	2	18	12	17	13	16	16	25	21	15	29	14	13	12	12	15	14	9	17	4	8	10	11	8	16	13	21	30	18	9	13	3	8	17
ABCC5_26	200	233	316	317	239	232	213	232	282	294	173	289	229	213	208	238	305	250	221	243	136	133	192	209	202	149	220	154	250	302	145	167	129	113	96	92	127	127	182	160	212	229	163	160	139	148	60	77	276
ABCF1_35	369	296	438	393	423	400	253	249	338	407	285	340	283	306	306	284	327	301	270	359	583	529	534	604	385	395	431	321	466	426	409	346	515	473	488	619	465	440	416	394	456	384	322	416	452	420	388	507	510
ABCF3_36	39	25	31	36	33	35	29	49	30	37	17	27	20	31	18	25	24	26	38	42	34	34	52	53	32	28	11	9	40	36	21	15	29	18	26	27	36	38	31	29	26	25	21	29	29	22	23	22	28
ABCG1_37	0	0	0	0	0	0	0	0	3	0	1	0	0	0	0	0	1	1	0	0	0	1	1	0	0	0	1	1	0	1	4	0	2	0	1	0	0	1	1	0	0	1	1	0	3	1	1	0	0
ABCC3_38	22	23	31	36	34	26	15	18	27	25	29	28	19	28	21	32	36	18	26	22	45	41	33	31	22	20	29	22	23	19	27	23	25	33	11	18	14	16	32	33	32	12	38	44	18	23	32	23	32
ABCG2_39	4	4	0	8	5	2	1	4	3	0	1	3	1	0	2	0	0	2	3	1	2	7	10	8	0	3	4	7	4	4	5	4	5	3	3	5	5	2	3	1	1	2	5	5	3	2	2	2	4
ABCG2_40	0	0	1	0	0	0	0	0	0	0	0	0	0	0	0	0	0	0	0	0	0	0	0	0	0	0	0	0	0	0	0	0	0	0	0	0	0	0	1	0	0	0	0	0	0	0	0	0	0
ABCG2_41	0	3	0	4	1	1	0	0	0	0	0	3	2	0	2	3	1	5	2	0	2	3	7	3	0	1	1	1	2	1	3	1	0	4	3	3	3	4	3	2	0	1	3	2	3	0	0	1	0
ABHD6_45	34	28	29	43	33	35	21	29	50	58	43	23	26	20	16	25	42	27	26	32	32	22	28	40	13	23	29	12	27	27	16	15	9	19	10	15	19	24	29	17	25	21	22	35	23	18	9	7	35
ABL1_46	6	5	9	6	8	6	5	6	7	5	11	10	7	6	4	1	2	5	6	8	12	17	5	8	11	8	8	0	15	8	1	6	10	15	5	8	2	3	17	8	5	9	9	15	4	3	7	1	4
ACADL_49	0	0	0	0	0	0	0	1	0	1	1	0	0	0	1	2	0	0	0	0	0	1	0	0	0	0	0	0	1	2	0	0	0	0	1	0	0	0	0	0	0	0	0	0	0	0	0	0	0
ACAT2_56	258	214	307	360	371	386	175	201	150	173	266	227	165	172	206	149	207	178	334	238	161	178	252	250	147	185	196	193	284	399	157	200	181	227	87	155	138	88	96	129	171	157	114	69	160	174	130	162	298
ACBD3_59	98	91	126	112	111	112	109	100	97	152	121	126	100	109	83	67	94	80	82	83	98	84	121	90	88	66	127	81	113	127	82	93	100	110	90	105	94	79	88	69	165	155	108	85	141	151	92	112	130
ACD_60	44	25	33	44	29	50	19	17	32	33	34	39	24	13	26	28	31	25	44	31	53	33	35	42	43	31	31	31	52	43	28	31	47	58	29	42	37	39	28	34	26	33	19	32	27	29	26	22	35
ACE_61	0	0	0	0	0	0	0	0	0	0	0	0	0	0	0	1	0	0	0	0	0	0	0	1	0	0	0	0	0	0	1	0	1	0	0	0	0	2	0	0	0	0	0	0	0	0	0	0	1
ACHE_63	0	1	1	0	2	3	3	4	0	2	0	2	2	3	2	0	2	0	2	2	1	3	3	4	0	0	2	9	3	1	2	4	2	2	10	11	2	5	8	3	2	2	0	2	1	1	0	2	1
ACLY_66	39	41	39	81	61	47	35	34	18	36	81	39	87	33	24	32	36	47	111	53	34	29	60	45	28	24	44	67	81	155	40	78	59	44	28	26	52	29	47	34	32	42	72	49	56	36	27	20	44
ACOT9_69	2	1	5	3	3	9	1	2	3	1	4	6	1	0	2	0	1	3	3	3	3	2	5	8	1	1	2	2	2	5	4	2	2	7	6	3	5	4	6	4	4	7	4	1	3	3	2	8	2
ACSL1_75	9	8	16	22	13	13	9	8	5	14	4	8	22	10	11	23	8	9	28	13	9	19	12	12	13	22	21	22	22	56	7	12	17	19	27	32	39	19	30	34	16	15	23	11	12	29	31	31	7
ACTN2_90	5	4	7	5	5	2	4	3	9	15	5	6	1	8	5	3	3	3	4	9	28	24	43	55	20	13	7	6	3	9	11	7	13	29	34	44	50	52	49	47	3	3	12	10	9	9	22	20	7
ADAM10_102	1045	1011	1444	1599	1278	1285	871	933	1542	1514	834	1010	973	802	833	911	1156	966	888	913	1392	1479	1532	1658	1005	937	1345	1210	1131	1268	703	671	735	903	993	1119	1032	1186	891	826	1240	1204	936	804	694	628	566	628	1266
ADAT1_113	10	7	18	14	14	6	5	6	6	9	9	4	8	9	14	6	7	7	5	11	9	14	9	10	8	7	6	10	19	9	6	5	15	5	9	3	8	9	3	4	2	6	12	12	9	10	3	7	16
COQ8A_114	19	13	50	47	20	31	28	31	38	38	36	30	43	26	19	13	29	30	39	25	48	19	40	40	44	43	37	24	31	32	14	14	14	21	8	16	14	18	25	12	30	17	34	34	19	15	11	6	17
ADH1A_126	0	0	0	0	0	0	0	0	0	0	0	0	0	0	1	2	0	0	0	1	0	0	0	0	0	0	0	2	1	0	1	1	1	0	1	2	0	1	0	0	2	0	0	0	1	4	0	1	0
ADI1_135	121	76	117	87	143	119	79	81	93	110	108	138	72	109	86	83	103	113	51	130	115	110	162	132	126	126	185	80	152	121	109	66	117	129	93	116	93	73	126	109	116	103	77	135	105	100	48	75	149
ADM_140	12	8	3	15	17	12	6	16	6	14	15	7	18	13	11	11	9	12	12	7	25	12	40	67	32	43	24	11	28	43	14	6	17	12	29	29	62	47	63	61	11	14	61	46	10	10	17	17	12
ADO_144	94	114	96	101	127	122	71	77	111	120	99	128	99	81	74	73	107	81	131	112	209	180	158	159	147	125	231	160	174	187	159	155	143	209	110	116	154	99	146	131	130	126	142	158	149	97	116	119	133
ADORA2A_146	6	1	0	4	2	0	0	0	0	0	1	0	1	3	0	1	6	2	5	2	6	6	8	9	9	6	3	1	1	2	7	5	3	5	5	9	7	9	12	8	1	1	2	3	1	2	6	1	0
ADRB2_151	5	2	0	1	1	2	1	0	0	0	2	0	0	0	1	0	0	5	4	2	7	0	2	16	3	4	2	3	2	0	4	2	3	6	6	7	5	2	5	1	1	1	2	4	1	0	3	3	7
ADSL_153	13	2	7	10	1	10	3	3	3	4	13	6	7	7	5	10	2	12	10	5	1	6	3	6	7	2	10	10	5	9	3	5	6	5	6	4	6	5	6	4	3	4	9	16	3	6	3	6	7
AFP_158	77	82	76	66	67	58	31	36	45	62	40	45	37	45	46	49	66	50	55	70	70	84	96	98	45	31	74	51	65	77	60	56	62	89	36	35	22	25	13	22	55	57	55	53	39	50	27	52	108
AGL_162	120	121	270	232	226	194	154	133	169	204	135	155	123	143	149	136	128	144	114	145	110	92	109	143	76	88	231	147	157	119	100	101	103	92	95	125	107	112	81	80	177	170	94	119	113	112	69	96	193
GPAT3_164	0	1	0	0	0	0	0	0	0	0	0	0	1	0	0	0	0	0	0	0	0	0	0	0	0	0	0	0	0	0	0	0	0	0	0	0	0	0	3	0	0	0	0	0	0	0	0	0	1
AIFM1_183	115	107	182	184	171	168	126	106	99	153	138	141	124	96	115	102	162	113	142	122	83	79	118	124	100	101	149	91	193	190	63	110	94	90	57	79	80	64	60	90	147	115	115	123	82	72	55	68	170
AKAP8_195	288	267	629	683	415	494	389	396	400	492	394	385	439	360	440	443	398	368	454	501	464	517	466	577	401	374	299	268	437	462	287	292	345	505	352	469	385	470	291	299	314	398	422	359	217	232	232	277	437
AKAP8L_196	24	18	50	51	38	40	38	29	34	45	63	34	35	40	23	23	22	29	63	30	32	29	28	44	21	21	32	27	24	39	31	27	21	26	32	30	24	22	23	29	26	33	31	30	27	17	16	25	28
AKR1B1_197	119	120	124	153	151	138	76	78	109	123	92	116	113	120	68	98	99	100	119	133	106	156	172	179	173	189	119	124	183	209	113	96	126	117	225	291	331	232	344	346	131	118	195	138	152	106	119	166	154
AKR1C3_203	17	10	24	25	17	12	5	10	46	41	29	35	31	32	10	20	21	13	18	22	12	5	9	6	3	6	33	31	17	18	22	16	9	9	3	3	3	1	2	5	43	25	9	14	28	8	4	10	22
AKT1_210	161	169	198	242	219	239	93	153	161	192	123	140	123	115	144	131	180	156	163	169	237	234	222	249	142	112	184	179	147	182	126	117	162	170	184	185	196	220	150	127	141	158	138	105	140	141	134	169	225
ALB_217	0	1	0	3	1	1	1	2	0	0	2	1	1	0	0	3	0	2	1	0	0	0	0	0	1	2	2	0	0	2	5	0	0	2	1	0	2	0	1	3	0	0	6	2	4	1	2	0	2
ALDH2_225	439	498	639	773	457	489	410	404	809	723	506	565	573	475	406	421	539	484	562	502	406	368	340	376	258	214	367	375	401	487	439	399	323	375	322	334	225	211	164	198	547	624	780	684	436	456	286	293	599
ALDH7A1_227	21	24	22	22	23	9	6	15	22	21	30	22	20	28	21	21	13	14	16	21	9	18	20	17	31	19	34	19	21	26	29	14	10	17	10	10	8	11	4	14	15	11	15	13	17	18	6	9	16
ALDH9A1_231	1426	1594	1610	1990	1511	1616	1194	1363	2008	2140	1395	1432	1243	1136	1053	1005	1582	1418	1404	1258	1537	1465	1583	1770	1163	966	1874	1734	1296	1365	1179	1200	1008	1100	1066	1002	1030	1203	828	749	1737	1802	1174	919	1061	926	650	793	1727
ALDOA_232	1434	1565	1988	2641	2112	2335	1306	1535	1622	1681	1508	1407	1562	1193	1319	1326	1662	1502	1889	1519	1747	1574	2137	2388	1604	1477	1812	1609	1376	1992	1258	1291	1261	1471	1391	1649	2222	2111	1949	2014	1567	1738	1864	1336	1255	1354	992	1250	2151
ALDOC_233	1	0	0	0	1	0	0	0	0	0	4	0	0	1	0	0	0	0	3	0	0	1	0	1	0	0	0	0	0	0	0	1	1	0	1	0	0	0	1	0	1	1	0	1	0	2	0	1	2
ALG8_238	168	143	255	253	252	210	141	148	169	206	156	144	153	157	146	177	175	159	197	152	205	205	325	291	167	172	195	196	212	203	119	150	190	191	145	187	187	166	167	154	184	152	146	142	166	128	125	135	261
AMDHD2_248	89	92	107	126	94	95	77	58	98	123	62	89	72	74	75	78	102	94	64	115	82	78	125	118	100	85	49	36	114	109	30	40	54	69	39	43	68	73	57	58	59	59	62	68	45	29	21	24	140
AMY2A_256	15	7	47	34	17	20	13	26	33	31	24	45	34	28	14	21	17	22	43	7	14	13	13	11	13	14	33	28	17	19	26	21	12	7	8	11	9	5	8	9	27	23	28	17	21	15	8	10	16
ANKRD10_277	890	858	1386	1541	1316	1318	1013	990	1252	1274	1057	1064	1109	938	1016	985	1106	999	1079	1022	1700	1619	1716	1952	1169	1254	1154	927	1360	1478	838	780	1151	1309	1377	1567	1362	1287	1298	1179	1186	1106	1120	949	999	887	1054	1046	1351
ANKRD20A17P_283	91	88	185	211	142	129	101	123	160	156	83	101	130	127	136	142	129	79	100	99	86	85	83	116	47	62	140	103	83	100	92	80	83	87	134	148	78	106	90	84	101	99	71	59	114	119	96	86	131
ANKRD36B_290	53	30	55	63	51	36	59	54	59	51	70	77	74	62	47	52	91	53	87	59	41	35	42	51	44	43	53	33	61	92	38	40	29	27	24	23	20	37	31	34	48	19	45	37	24	28	11	20	72
ANO10_292	105	125	127	165	110	140	107	104	136	130	131	131	143	103	106	105	128	119	88	118	92	90	102	96	67	75	91	83	102	123	93	94	93	81	61	85	71	69	67	42	112	109	73	55	104	101	76	74	145
ANXA2P2_305	9148	8785	10903	13978	11196	10657	5974	6351	8472	9274	9576	8288	10407	7395	6527	6626	8582	8559	14056	9264	11102	9734	11823	11943	7079	6607	11572	12532	12250	19056	8179	10544	9070	10815	7652	8462	9786	6801	5426	4924	11109	12224	11712	7418	9100	9220	6545	7616	12858
ANXA5_309	578	419	809	715	714	740	438	435	687	759	737	674	534	619	511	473	513	539	543	649	771	616	718	722	526	500	1019	751	819	729	571	643	624	779	622	785	580	518	607	498	797	673	472	564	710	622	563	612	629
ANXA7_312	123	125	187	224	215	189	124	129	149	181	200	163	212	141	130	136	114	95	219	143	175	162	186	231	149	164	228	275	196	252	189	196	158	186	232	301	242	177	176	171	234	198	320	227	243	215	210	254	149
AP2M1_322	76	82	61	86	77	79	45	39	86	67	53	60	53	52	54	57	68	49	44	77	48	38	48	53	55	31	39	46	54	66	39	42	50	33	33	44	55	46	58	21	71	64	57	38	51	44	39	34	107
APBB2_336	26	25	27	26	28	22	14	21	14	34	49	31	32	16	25	22	25	30	57	35	41	39	51	66	40	22	34	33	53	54	19	10	35	32	10	7	41	20	28	20	50	34	57	52	15	20	10	15	38
APLN_345	0	0	0	0	1	0	1	0	0	0	0	2	0	1	0	1	0	0	1	0	3	1	1	0	4	0	5	2	4	3	0	1	1	2	0	1	0	1	0	2	0	0	0	1	0	0	4	0	2
APOBEC3G_355	11	14	316	321	304	337	192	193	29	49	120	126	119	82	147	166	17	26	34	15	382	331	467	523	308	316	29	26	92	125	101	105	235	230	407	429	558	476	499	489	35	51	190	127	98	87	217	273	33
APOE_358	5	1	5	0	2	2	3	2	4	5	1	4	4	4	1	0	0	2	6	1	3	2	3	2	0	0	2	0	8	4	3	1	2	3	5	4	1	0	0	0	4	2	8	13	2	3	0	2	3
APP_367	2197	2093	4060	4347	3085	3089	2503	2540	3269	3317	2949	2972	2789	2684	2412	2306	2292	2228	2255	2658	3052	2646	2551	3021	2466	2270	3462	3088	2991	3179	2523	2657	2523	2561	3526	3738	3522	2945	3291	3055	3097	3334	2839	2566	2927	2780	2506	2589	2757
APPBP2_370	656	545	996	888	908	875	583	599	903	815	750	827	675	682	629	585	659	648	677	606	664	649	707	674	612	576	1003	737	777	798	590	555	519	558	476	593	538	539	573	536	825	781	771	832	701	599	451	533	898
AQP3_373	2	0	1	0	0	0	0	0	0	0	0	0	0	1	1	0	0	0	0	0	0	0	0	3	0	0	0	0	0	1	0	0	0	0	0	2	1	0	0	0	0	1	0	1	1	0	0	0	1
AQP9_378	0	0	0	1	0	0	0	0	0	0	0	0	0	0	0	0	0	0	0	0	0	0	0	0	0	0	0	0	0	0	1	0	0	0	1	0	0	0	0	0	0	0	0	0	0	0	0	0	0
AREG_385	0	0	0	0	0	0	1	0	0	0	0	0	0	0	0	0	0	0	0	0	0	1	1	0	0	1	0	0	0	0	0	0	0	1	1	1	1	0	0	1	0	0	5	8	1	0	0	0	0
ARFIP2_405	63	33	79	69	77	80	42	46	61	85	59	72	47	52	59	38	59	62	43	88	65	61	68	56	54	61	92	52	79	68	52	31	57	46	41	62	26	41	60	52	48	47	57	59	66	59	47	34	82
ARHGAP1_411	44	41	61	91	58	63	51	55	79	91	82	89	68	72	46	43	56	48	67	63	47	53	59	85	34	46	50	39	67	92	55	43	39	49	49	68	50	48	41	41	63	67	65	48	49	55	35	35	69
ARHGEF12_420	2384	2345	4017	4135	3396	3593	2577	2456	3387	3681	2651	2719	2703	2499	2724	2583	2661	2384	2219	2628	3428	3328	3006	3199	2344	2231	4222	3502	2828	3031	2745	2527	2406	2761	3089	3122	2281	2476	2210	2025	3632	3532	3043	3146	2812	2719	2261	2410	3461
ARHGEF2_423	61	59	66	64	60	53	52	57	66	61	84	81	79	50	34	44	82	89	103	81	132	108	138	151	129	125	268	196	146	233	161	162	133	165	130	135	122	123	122	114	256	217	655	542	162	201	115	130	122
ARHGEF9_427	2	2	0	0	0	0	0	0	1	0	2	0	0	4	1	0	1	4	3	1	1	0	0	1	0	0	2	2	0	0	0	0	0	0	1	0	0	0	0	1	2	4	1	1	2	0	0	3	4
ARID4B_430	493	490	755	797	588	606	467	483	678	705	491	515	564	502	436	478	536	443	542	518	619	589	658	693	487	526	985	879	480	663	504	543	460	540	741	841	573	583	492	467	910	877	529	446	585	556	557	579	678
ARPP19_466	225	177	239	227	280	210	203	155	250	280	283	251	235	222	192	185	214	274	319	291	215	195	219	206	164	156	354	250	314	265	176	172	175	229	106	178	151	92	155	165	236	228	156	188	263	217	185	195	342
ARSL_468	1	5	4	2	5	2	2	5	10	4	2	5	3	1	4	1	2	3	2	3	3	2	0	1	7	1	1	2	1	4	2	3	3	1	1	0	0	0	0	0	5	0	0	1	4	6	3	0	2
ASAH1_474	271	265	455	461	344	391	196	204	334	407	231	251	325	268	269	230	293	310	429	308	350	332	353	303	186	199	544	471	268	281	307	375	270	276	214	343	189	142	121	141	430	342	176	124	315	291	191	245	370
ASCC3_480	297	249	476	537	489	472	302	295	329	313	242	294	234	247	392	382	313	271	268	286	443	446	455	486	273	277	305	254	355	405	209	243	345	372	420	480	347	363	278	294	250	278	390	315	267	220	367	405	372
ASPM_487	7	4	3	9	5	12	4	6	10	5	7	5	10	5	4	0	6	6	21	2	3	2	14	16	7	9	3	3	5	16	0	4	4	5	6	2	4	2	10	4	6	4	13	5	5	1	6	2	9
ASPN_490	57	49	47	46	23	26	13	10	45	35	12	19	30	29	26	24	30	35	39	39	13	20	8	11	6	5	44	51	3	7	34	36	25	39	12	20	5	5	4	1	51	33	4	2	22	42	16	19	71
ATF1_497	45	23	33	17	31	42	25	24	23	27	28	25	19	19	24	23	27	16	20	24	29	53	43	29	24	29	36	38	39	33	13	32	27	33	25	29	25	22	28	25	19	17	35	34	17	16	9	26	34
ATF3_499	1	1	3	2	1	8	6	4	1	1	1	1	3	3	1	1	0	1	2	0	4	3	1	2	4	1	3	1	0	1	3	1	5	4	8	3	4	3	5	5	7	8	14	8	23	9	8	5	0
ATF5_501	108	89	85	104	74	102	34	79	59	67	43	54	60	40	55	55	74	70	64	66	233	227	229	249	189	183	65	42	123	135	102	88	155	209	474	545	396	403	267	255	96	77	463	336	100	141	213	289	102
ATF6_502	201	175	317	273	225	211	179	165	273	299	198	279	262	200	207	193	194	230	219	275	225	204	180	206	146	148	330	258	218	291	204	184	180	240	83	121	98	93	90	87	247	184	280	297	236	209	142	147	281
ATF6B_503	72	66	120	181	94	92	60	81	99	128	120	89	102	88	70	71	51	75	176	97	60	75	57	79	45	57	95	88	80	132	73	83	62	74	36	43	44	23	72	61	94	105	120	72	96	90	37	45	93
ATG3_504	174	174	289	304	291	290	155	172	180	245	230	260	227	232	178	184	186	177	216	206	263	229	263	260	175	204	256	223	270	308	157	143	242	272	211	292	251	244	227	216	222	167	319	327	156	151	178	190	263
ATIC_507	182	169	189	220	172	199	123	133	136	168	230	173	180	124	130	130	171	141	245	201	242	215	243	325	180	158	164	165	247	352	98	156	176	192	136	155	204	155	157	143	158	117	368	259	143	138	118	119	245
ATMIN_513	264	295	378	497	419	434	268	277	354	393	285	309	265	279	219	244	310	270	376	278	246	301	349	383	260	264	377	304	362	432	193	229	195	230	162	169	223	209	200	206	319	293	471	344	206	168	130	135	344
ATP11B_517	223	155	242	298	222	212	162	181	229	276	161	182	231	193	186	177	203	159	143	186	161	185	193	225	139	144	314	237	209	230	244	212	152	180	138	141	108	110	127	130	333	281	286	238	245	249	170	189	276
ATP1B1_527	424	434	424	496	345	363	271	266	567	690	373	416	329	289	307	273	434	435	506	502	307	277	363	330	259	234	568	474	206	260	262	321	214	289	222	239	205	225	194	185	439	499	230	207	283	236	163	185	565
ATP2C1_533	1274	1231	1488	1840	1368	1479	996	998	1379	1693	1054	1245	1202	1094	1109	1159	1397	1111	1106	1284	1672	1777	1870	2254	1456	1440	1932	1533	1615	1799	1277	1204	1269	1384	1391	1518	1435	1500	1478	1370	1635	1480	1471	1316	1294	1147	1123	1112	1732
ATP5F1C_537	622	700	704	750	770	719	430	474	589	689	481	554	518	524	532	494	569	533	504	608	516	530	614	601	445	452	670	561	566	598	483	449	523	561	449	464	435	498	402	364	615	565	503	438	543	451	398	446	853
DMAC2L_554	11	12	16	19	11	9	10	16	24	11	14	28	20	21	11	8	13	12	17	12	12	9	13	26	8	5	8	23	9	18	14	12	17	13	7	19	17	6	21	6	12	14	9	13	19	14	7	7	13
ATP6V0B_562	39	27	46	34	30	40	29	33	43	51	35	25	34	30	25	23	14	19	38	31	33	29	51	49	37	48	20	21	47	34	37	32	24	43	30	52	37	27	37	35	24	16	44	23	32	45	28	33	48
ATP6V1D_574	950	948	1407	1531	1305	1299	748	870	999	1240	857	919	879	775	893	822	944	888	988	931	998	1104	1046	1207	758	604	1198	1119	921	1028	728	838	853	976	757	893	750	765	618	546	1161	988	1005	758	768	741	659	683	1274
AURKA_586	116	87	80	90	163	210	85	63	55	65	64	70	53	55	70	68	82	87	77	74	53	83	138	191	171	146	39	44	116	124	41	43	66	85	52	67	73	77	91	77	53	33	98	67	56	48	53	63	188
AURKB_587	109	96	109	114	123	159	52	42	48	61	71	67	47	62	52	60	114	92	88	97	151	102	208	211	189	171	52	66	176	174	45	50	65	85	49	79	88	78	103	90	67	68	62	78	69	45	60	63	144
B2M_596	849	611	4105	4370	5411	5160	4948	4497	1434	1735	8398	8411	1669	1625	1993	2042	908	875	1102	1094	3890	3458	5710	5743	5463	5367	1735	1513	3247	3777	1543	1579	2308	2548	5884	6679	7650	6785	8472	7901	2071	1924	8253	7801	2794	2369	2834	3274	988
B3GAT1_598	9	3	21	20	16	12	3	11	14	14	13	22	9	8	9	7	7	12	4	4	12	2	6	7	6	3	15	11	5	12	5	8	18	11	11	6	6	3	3	2	5	13	3	5	14	15	5	10	11
B4GAT1_602	1	3	3	0	0	3	0	1	1	2	2	0	2	2	0	0	2	2	2	2	1	1	0	2	1	1	0	0	3	0	0	0	0	0	0	0	0	0	4	3	1	1	0	0	2	3	0	0	1
B4GALT1_603	0	0	2	0	0	6	2	0	0	2	1	1	0	0	1	3	1	1	0	2	1	4	6	0	4	5	0	0	0	0	1	5	2	0	2	4	1	1	5	3	5	2	1	0	2	1	2	0	0
B4GALT5_608	8	7	21	43	34	24	16	25	21	29	38	26	12	14	15	6	11	11	21	9	17	13	26	26	21	20	25	21	25	38	17	21	3	14	18	33	30	12	37	50	17	31	21	18	35	41	19	17	12
BAAT_614	6	3	3	3	10	4	6	3	6	4	4	3	7	11	2	2	3	5	5	5	4	1	5	8	1	6	3	4	3	7	13	5	7	0	3	7	2	2	4	1	8	3	11	10	9	2	4	4	6
BACE2_618	6	4	10	13	17	25	9	7	4	14	8	11	7	6	8	11	8	9	5	9	21	32	25	32	11	20	6	15	11	14	9	12	18	15	19	18	14	15	15	16	10	6	14	7	7	10	11	10	9
BAD_619	21	8	16	19	6	25	7	10	14	12	20	9	11	9	7	8	14	17	13	14	11	12	5	9	10	4	5	14	18	18	10	16	9	8	4	13	13	8	6	10	11	10	10	9	11	18	2	10	23
BAG3_629	68	54	104	131	128	120	68	61	80	92	115	101	92	75	43	68	57	75	120	94	59	43	48	43	61	47	47	71	92	151	42	58	38	59	38	34	61	33	62	55	70	68	92	59	47	60	33	37	111
BAK1_631	0	1	9	4	9	9	3	2	2	11	1	7	10	3	3	2	5	1	5	5	1	1	2	8	2	4	1	3	4	3	5	3	4	6	6	10	4	6	11	2	3	6	3	6	7	6	3	3	4
BAMBI_634	77	71	52	74	57	46	34	30	41	64	65	74	36	39	31	33	64	69	83	94	88	66	88	138	87	99	623	387	108	100	184	162	56	48	205	161	52	80	56	62	196	198	100	98	110	74	68	94	131
BANF1_635	293	286	443	469	519	508	307	277	330	396	359	357	322	283	311	286	332	351	357	366	365	319	504	536	320	316	375	287	461	442	278	280	268	319	253	300	326	280	337	287	384	286	362	340	335	303	218	233	401
BBC3_640	6	6	13	19	11	7	6	7	8	17	10	10	12	12	11	11	11	4	13	7	19	17	15	17	26	26	11	8	30	42	12	21	11	18	26	21	17	18	34	11	3	2	27	24	23	16	25	17	6
BCAT2_651	2	2	0	2	0	0	0	1	0	2	1	2	1	1	0	5	3	0	4	1	0	0	0	1	3	1	3	2	5	1	2	1	4	4	0	2	0	0	0	0	0	2	2	1	2	2	0	0	2
BCL2_658	38	27	15	25	37	30	15	17	36	49	35	34	42	37	24	12	35	29	27	25	22	19	13	21	24	23	7	9	17	32	23	18	28	26	26	47	22	21	28	27	33	29	20	17	17	14	29	29	51
BCL2L1_660	3	3	0	0	0	0	0	0	3	0	0	0	0	2	3	0	0	0	2	0	1	0	1	1	2	2	0	0	2	0	2	1	0	1	1	2	1	1	0	1	1	0	3	1	1	0	0	1	0
BCL2L11_661	3	1	8	5	1	7	5	4	4	4	7	3	6	3	4	1	3	2	18	7	3	2	7	6	7	14	11	1	11	14	1	5	0	5	2	3	3	1	3	7	7	2	11	6	4	2	3	4	3
BCL2L11_663	9	5	7	17	14	14	9	10	6	7	11	4	2	2	12	10	6	13	11	9	6	7	23	28	20	18	9	2	13	21	6	4	3	7	1	1	5	7	7	6	5	9	8	8	2	0	2	2	3
BCL2L13_664	98	100	226	280	192	160	142	131	137	184	176	183	192	172	164	194	118	119	121	158	154	179	181	185	161	145	157	129	115	125	212	191	155	188	70	118	70	75	119	78	130	101	130	115	184	163	100	82	162
BCL2L2_665	17	10	26	25	18	20	22	10	20	19	26	16	17	16	11	14	18	17	21	20	21	17	23	17	18	24	14	14	25	38	29	14	15	16	14	30	30	26	19	15	16	16	12	13	18	32	16	20	22
BCL3_668	6	3	14	6	19	6	15	6	7	11	9	12	7	14	7	5	7	12	2	10	11	17	9	16	14	15	17	11	13	13	5	9	11	8	19	11	22	5	22	20	7	19	7	13	15	13	8	23	6
BCL7B_670	29	32	34	27	43	41	40	22	30	41	18	23	39	17	28	28	34	24	25	42	40	33	41	45	35	29	50	23	39	30	19	22	46	39	49	50	42	41	61	28	42	32	43	45	31	33	28	28	42
BDH1_674	0	0	0	0	2	0	0	0	2	2	3	0	0	0	0	0	0	1	0	0	1	0	0	2	0	0	1	0	0	0	1	0	0	0	0	1	1	0	0	0	0	0	0	3	0	0	1	1	0
BDNF_679	1	4	4	5	5	3	0	1	5	5	0	0	4	8	3	3	1	1	0	2	0	0	5	1	0	1	6	4	0	5	2	1	5	2	4	2	0	1	2	0	2	3	4	3	4	6	2	4	6
BECN1_680	86	54	75	167	60	85	86	84	66	92	119	75	119	59	60	80	47	75	185	60	67	73	53	73	41	60	61	107	65	143	40	67	58	64	64	100	81	38	66	48	65	59	158	61	63	81	40	66	63
BHLHE40_689	38	53	41	68	34	44	30	35	43	36	81	76	44	41	29	36	46	38	87	63	36	45	77	79	52	38	44	42	71	136	34	36	47	40	35	43	48	28	34	21	47	39	30	34	19	12	16	17	59
BID_696	69	63	61	55	56	78	35	55	63	75	62	58	67	41	63	52	72	69	95	98	458	394	351	438	379	386	223	155	202	240	325	313	320	378	383	420	462	400	364	379	184	156	219	205	271	212	298	319	102
BIRC2_703	102	133	180	186	193	189	134	106	160	220	144	157	161	136	132	141	129	111	120	123	409	503	495	566	348	298	423	338	247	264	377	311	388	425	381	481	419	460	262	258	380	349	193	187	338	338	352	373	183
BIRC5_709	72	62	58	88	134	113	61	54	40	70	40	43	24	43	39	36	76	77	55	55	37	48	105	98	67	75	49	36	72	106	29	39	29	49	36	36	38	47	31	44	58	28	46	23	38	33	17	47	80
BLMH_719	25	11	25	35	25	21	15	13	21	35	34	31	21	20	14	9	31	20	21	27	34	9	34	24	24	22	47	35	42	41	26	16	22	31	4	17	8	6	16	9	32	33	21	17	20	16	16	16	24
BLNK_720	0	0	2	0	0	0	0	0	0	0	0	0	1	0	1	0	0	0	0	2	1	0	0	0	0	0	0	0	0	0	0	0	0	0	3	2	4	10	3	1	0	0	1	0	0	0	0	1	0
BLVRA_731	83	67	126	199	165	158	82	79	76	96	122	96	111	68	110	85	87	86	117	99	126	134	146	169	101	106	85	111	118	126	84	126	140	149	161	206	209	139	180	156	87	89	89	95	111	117	136	155	117
BMP4_737	0	1	0	6	0	1	1	0	1	3	0	1	1	1	3	0	1	2	1	2	18	7	10	22	8	6	4	3	1	5	8	3	7	5	23	23	13	20	20	7	3	0	10	7	5	2	15	21	0
BNIP3L_746	120	115	246	283	162	190	164	144	171	217	254	224	267	178	129	129	140	140	393	184	130	119	183	188	155	97	226	253	221	396	140	197	100	110	98	118	163	100	145	143	194	207	258	149	168	129	75	87	166
BRCA1_757	0	0	0	1	0	1	2	0	0	1	0	0	2	0	1	3	1	1	1	2	0	0	0	2	2	2	4	0	1	0	0	1	0	0	2	0	0	0	0	0	1	1	2	1	1	0	0	0	1
BTK_795	2	2	3	2	1	2	0	4	1	1	1	1	0	0	1	0	0	0	2	0	1	1	0	0	0	0	4	2	0	0	0	2	0	1	0	7	1	0	0	0	2	0	1	1	0	0	0	2	0
BTN3A2_796	8	8	99	115	147	114	110	107	27	29	143	125	44	19	45	37	16	21	30	26	46	44	65	92	81	71	22	12	58	60	21	29	34	25	34	51	79	65	66	63	13	18	109	73	22	18	18	23	13
BUB1B_800	39	33	8	40	40	31	14	9	19	26	21	19	17	11	24	17	27	25	24	22	17	26	41	48	34	38	43	13	40	60	13	16	23	28	6	4	15	9	21	23	25	9	21	13	21	12	6	13	34
BZW2_805	51	66	57	70	75	73	50	38	48	81	40	53	52	45	40	44	68	58	76	51	91	115	105	89	70	61	96	159	159	212	101	105	99	107	47	67	45	37	48	39	118	102	69	80	107	91	70	75	103
TIGAR_823	192	136	204	195	206	205	139	130	189	202	199	193	153	143	160	163	164	143	169	185	188	144	217	227	156	131	206	190	241	322	118	161	149	177	119	143	150	135	121	123	190	159	313	260	109	105	87	92	237
MCEMP1_855	0	0	0	0	0	0	0	0	1	1	0	0	0	0	0	0	0	0	0	1	0	0	0	0	0	0	0	0	0	0	0	0	0	0	0	0	0	0	0	0	0	0	0	0	0	1	0	0	0
C1D_859	31	19	44	42	51	54	38	31	44	39	41	44	18	28	24	21	34	23	31	39	31	24	33	37	25	18	50	35	45	40	39	33	36	27	7	9	9	11	14	12	32	29	43	14	23	17	10	14	60
C1orf131_862	168	157	266	366	250	268	169	194	205	218	191	218	185	168	188	207	221	197	194	223	268	330	310	315	190	180	277	248	205	226	165	182	246	292	224	321	232	199	199	209	236	201	194	210	184	132	173	238	286
C1QA_867	0	0	0	0	0	0	0	0	0	0	0	0	0	0	0	0	0	0	0	0	0	1	0	0	0	0	0	0	0	0	0	0	0	0	0	0	0	0	0	0	0	0	0	0	0	0	0	0	0
C1R_871	31	19	304	288	292	272	278	268	109	83	286	282	98	100	122	114	47	41	65	58	296	246	406	372	497	470	38	38	164	134	61	63	108	122	373	472	542	546	911	914	88	90	820	894	143	118	245	203	29
CFB_872	9	8	168	151	199	164	180	168	50	55	193	160	38	49	65	55	32	16	15	29	350	370	708	741	976	1125	50	51	77	72	87	85	166	139	1497	1643	2613	2519	3738	3405	59	42	769	708	101	114	440	398	11
C2CD2_875	100	98	159	154	115	128	101	105	120	133	102	102	99	70	90	89	92	79	117	113	151	154	136	193	125	107	187	167	119	123	106	113	108	118	98	132	104	108	90	80	153	154	112	97	117	110	106	125	111
C2CD2L_878	0	2	3	1	0	0	0	0	1	0	0	1	0	0	0	0	2	1	0	0	0	0	2	1	1	2	0	0	2	0	0	0	0	0	1	0	2	0	2	1	0	0	0	1	0	0	0	0	0
C2CD5_880	304	293	423	463	374	386	298	353	388	439	309	379	296	255	273	270	317	286	286	289	358	389	505	524	397	396	285	275	315	414	174	167	236	253	239	261	296	333	329	306	336	264	304	254	160	162	150	189	370
C3_886	0	1	1	1	0	2	0	0	2	0	0	0	0	0	1	0	2	0	0	0	15	6	14	11	42	27	3	2	2	2	6	3	0	7	105	129	103	110	157	143	4	8	153	127	53	30	52	47	0
C5_890	45	45	88	85	67	64	39	45	72	80	64	71	51	52	58	44	50	55	67	35	49	56	69	68	55	51	64	45	54	50	30	23	31	39	21	39	37	32	38	30	39	37	58	63	27	27	21	19	59
C6orf62_903	1759	1536	3797	3869	3399	3339	1991	2104	2231	2372	1972	2166	2444	2179	2785	2641	1832	1813	1907	1958	5178	4705	4174	4715	2947	2850	2816	2241	2353	2753	2721	2582	4043	4496	4971	5076	3634	3545	3065	2802	2632	2458	2675	2555	3276	2835	3630	4064	2271
CA2_908	13	13	35	22	24	36	25	42	70	90	56	47	65	40	31	21	17	16	18	26	16	20	18	16	18	28	83	73	17	18	50	49	26	23	12	18	19	9	17	24	46	71	13	7	61	32	7	7	16
CA9_915	0	0	0	0	0	0	0	0	0	0	0	0	0	0	0	0	0	0	0	2	0	0	0	0	0	0	0	0	0	0	0	0	0	0	0	0	0	0	1	0	0	0	0	0	1	0	0	0	0
CAB39_918	224	183	242	291	300	275	174	161	246	285	309	314	259	225	174	184	218	244	260	256	267	232	218	287	199	210	385	277	269	398	217	260	294	323	203	291	239	227	196	238	289	250	277	284	311	297	216	255	333
CALM1_934	89	92	103	108	146	108	83	91	82	120	130	156	77	103	71	66	108	112	139	97	86	61	105	103	89	85	100	78	147	189	109	102	82	107	63	90	102	64	76	64	113	100	106	113	98	108	50	80	108
CALM3_940	1	5	1	4	6	1	3	2	1	1	2	4	2	4	2	5	2	9	8	6	2	0	2	4	2	2	3	2	3	10	3	4	2	6	3	5	6	0	1	1	5	0	3	5	2	5	1	0	2
CALR_943	2464	1956	2031	5292	2952	6009	3020	3573	1769	4665	4069	1605	3658	3366	3028	2707	1930	2913	3687	2388	2032	3834	2666	6887	4162	2978	282	180	4252	2102	2259	2608	2890	3153	1547	3891	2206	4989	3490	3821	1894	4193	809	655	2701	3178	2169	2147	2343
CALU_944	136	127	182	175	150	166	112	106	134	176	77	115	129	115	139	120	139	111	93	133	114	128	136	135	67	44	171	125	123	134	125	109	114	147	103	117	94	66	52	39	169	109	48	35	88	114	117	93	180
CAMSAP2_955	325	254	366	406	429	383	274	253	443	517	381	368	393	381	287	313	279	283	330	349	270	288	371	364	241	264	468	328	439	517	259	248	256	289	157	196	244	213	227	208	382	307	443	400	313	321	169	218	453
CANT1_956	39	39	69	67	77	79	43	42	59	57	47	46	57	43	39	43	60	63	55	60	65	63	66	75	61	52	44	51	75	78	56	40	61	70	72	107	76	64	62	64	78	60	59	57	52	81	60	55	67
CAPN1_957	40	34	70	32	67	70	50	35	57	57	77	62	43	65	51	39	33	41	34	60	44	28	53	74	38	54	44	21	97	45	45	31	43	48	47	34	74	39	45	79	61	66	30	36	58	59	39	49	51
CASC3_973	15	4	21	8	6	19	20	7	15	13	19	12	8	4	11	12	16	11	10	13	6	16	7	16	13	11	26	18	22	27	8	16	7	13	7	10	9	10	11	7	13	5	15	20	11	9	10	10	26
CASK_976	32	33	52	56	49	52	37	38	48	38	62	52	54	52	25	22	46	35	62	53	58	48	51	35	42	41	56	28	59	73	37	38	62	56	32	22	33	19	23	23	44	53	57	46	34	43	32	20	55
CASP1_977	19	13	74	115	95	97	71	43	10	22	50	58	36	37	45	33	15	6	11	6	105	108	133	160	100	81	13	8	33	45	21	20	79	98	110	118	153	128	102	121	15	15	73	53	20	32	70	57	14
CASP10_978	0	0	0	2	0	0	0	1	0	1	2	0	2	0	0	3	1	1	0	0	1	0	0	0	0	0	0	2	0	0	1	1	0	0	0	2	1	2	3	3	1	1	1	0	0	4	0	0	0
CASP10_979	1	1	0	0	5	0	0	0	2	0	3	1	1	2	1	3	1	0	0	1	1	0	2	0	0	0	0	2	0	0	2	1	0	1	5	6	4	8	3	7	2	0	0	2	0	3	3	2	0
CASP2_982	190	191	253	261	272	300	189	145	183	201	190	226	176	156	225	187	203	174	205	238	301	326	365	387	239	267	205	108	224	234	154	169	197	236	175	210	243	195	190	176	181	149	128	138	127	163	119	171	273
CASP3_983	122	102	168	200	173	135	110	100	154	214	142	151	143	132	79	109	150	127	137	153	289	286	339	338	238	231	409	302	238	245	298	310	265	244	240	360	328	299	255	260	371	308	184	190	325	335	248	283	171
CASP7_985	113	108	441	434	398	434	213	248	328	455	211	229	403	404	327	359	142	140	123	164	379	396	450	459	325	325	208	157	226	190	376	278	387	458	534	530	364	387	374	344	310	328	153	151	512	467	459	459	229
CASP8_989	13	6	39	21	27	22	12	16	25	12	33	21	19	27	23	16	7	12	25	18	17	31	21	15	25	21	12	25	27	16	11	7	12	23	10	27	29	21	31	38	27	13	28	37	4	19	13	16	15
CASP9_992	28	26	42	65	37	29	22	48	52	56	61	56	60	32	26	25	34	38	46	32	22	26	28	21	29	30	33	32	36	47	18	25	16	25	11	22	17	13	22	20	32	36	50	34	26	30	8	12	57
CAT_999	1061	932	1453	1695	1254	1334	1052	1115	1403	1606	1232	1271	1253	1037	918	874	1086	1010	1030	1028	592	647	731	746	594	574	1418	1211	1092	1260	830	941	557	664	393	490	409	431	492	447	1231	1240	601	538	878	888	468	460	1413
CBLB_1005	5	2	8	17	14	15	7	3	7	15	5	9	16	6	2	2	7	11	25	9	12	10	8	17	3	7	11	14	17	9	6	9	12	11	14	15	9	4	4	8	6	13	21	18	9	5	4	9	7
CBR1_1006	327	284	564	605	559	627	368	366	349	408	397	407	275	256	323	372	332	328	314	352	582	539	729	768	542	579	333	293	352	382	267	288	424	446	394	500	626	664	781	687	363	308	284	326	296	230	291	286	454
CBR3_1007	40	36	145	121	138	159	61	62	63	61	45	50	97	76	95	93	49	58	51	58	279	294	302	325	165	186	156	149	91	109	202	214	263	316	417	459	380	392	227	220	196	147	76	63	307	263	355	377	92
CBWD1_1009	997	845	1243	1361	1027	1063	757	768	1083	1294	1074	972	1040	984	825	876	1022	959	1246	1130	1018	1022	1133	1214	833	816	1286	1094	1306	1586	1023	1046	1065	1113	895	977	945	861	886	840	1198	1111	1641	1450	1041	1009	716	807	1383
CCDC85B_1030	0	1	0	0	1	1	0	1	1	0	0	0	1	0	3	0	1	0	0	2	0	2	0	2	2	4	0	0	0	0	2	2	0	2	1	4	4	1	0	1	1	1	2	0	1	0	1	0	3
CCDC86_1031	4	5	5	5	2	2	4	1	3	6	6	3	0	1	2	1	2	3	4	6	6	8	4	1	6	0	12	1	4	13	3	1	4	5	6	4	12	1	0	5	3	2	3	4	10	2	6	3	11
CCDC92_1033	28	53	46	85	45	61	35	43	59	52	87	47	86	41	48	35	53	43	108	47	33	29	47	46	33	36	18	8	60	152	42	44	33	37	36	39	30	22	45	43	43	42	126	66	60	62	21	23	57
CCL2_1039	2476	2286	2468	2770	2087	2130	902	949	8652	8610	1423	1611	3431	3198	2000	1958	3020	2972	3015	2981	22471	18202	21809	23666	15042	14518	25776	21457	12097	13158	16120	16215	16679	19736	20456	20445	21910	21262	15389	13924	30547	34489	7266	6473	26467	23572	15795	17399	3023
CCL3_1043	0	0	0	0	0	0	0	0	0	0	0	0	0	0	0	0	0	0	0	0	0	0	0	1	0	0	0	0	0	0	0	0	0	0	0	1	0	0	0	0	0	0	1	0	0	0	0	0	1
CCL4_1045	0	0	0	0	0	0	0	0	0	0	0	0	0	0	0	0	0	0	1	0	0	0	0	0	0	0	0	0	0	0	0	0	0	0	0	1	1	0	0	0	0	0	0	0	0	0	0	0	0
CCNA2_1050	72	61	66	89	123	124	58	37	46	47	77	57	69	48	79	47	81	74	97	73	90	82	94	146	108	103	50	58	122	148	24	36	47	96	17	33	57	45	77	58	46	40	58	39	37	28	26	47	131
CCNB1_1053	204	157	203	223	396	328	155	135	124	135	136	158	95	116	127	125	194	179	172	164	149	172	250	289	311	272	161	104	275	310	111	123	189	189	110	132	134	128	143	129	172	108	151	152	144	101	114	143	240
CCNB2_1057	96	58	95	89	188	146	86	91	42	79	82	66	66	58	62	51	81	98	108	88	74	77	118	138	145	144	93	66	146	201	42	36	61	68	26	49	48	42	43	48	64	66	103	79	76	55	31	57	129
CCND1_1062	47	41	35	38	68	60	40	35	25	32	38	52	37	38	19	42	43	40	62	49	91	103	93	108	62	58	33	23	104	90	50	51	122	95	53	76	111	119	93	83	44	34	64	62	41	33	78	59	64
CCND2_1063	39	36	37	41	35	29	19	12	59	53	33	35	25	34	29	25	36	35	38	38	28	13	18	23	16	10	63	37	31	60	34	30	24	28	6	17	5	5	3	4	47	35	117	96	30	33	14	14	52
CCNE2_1073	228	198	257	220	239	261	96	116	118	116	94	121	88	110	134	147	156	158	164	208	623	618	478	514	167	144	135	135	208	203	92	96	175	233	115	137	193	221	164	168	152	147	38	51	72	80	62	70	260
CCNF_1076	41	16	31	32	40	44	20	20	19	22	26	33	29	33	19	29	26	31	42	27	31	10	48	32	55	42	24	24	44	66	12	7	24	14	13	10	10	11	15	19	21	9	32	13	9	24	3	14	48
CCNG1_1079	1117	951	1487	1745	1615	1519	887	973	940	1179	976	1126	930	838	913	934	1236	1073	1025	1155	1152	1242	1671	1742	1164	1194	1268	1127	1936	2133	831	755	874	1014	806	1055	973	959	1092	1039	1175	1022	1633	1345	873	842	721	809	1350
CD320_1116	222	245	292	440	258	293	212	232	204	238	291	213	310	196	199	208	236	219	503	211	204	205	276	234	202	208	219	306	249	555	178	224	165	233	133	139	246	173	151	167	200	229	366	167	197	232	139	154	336
CD3D_1127	0	0	0	0	0	0	0	1	0	1	0	0	0	1	0	0	0	0	0	0	0	1	1	0	0	0	0	0	0	0	0	1	0	0	0	0	0	0	0	0	1	0	0	0	0	0	2	1	0
CD4_1128	0	0	4	0	0	0	0	0	1	0	0	0	2	0	0	0	0	0	0	3	0	0	0	0	1	0	0	0	1	0	1	0	1	0	1	0	0	0	2	0	1	0	0	4	0	0	0	1	0
CD40_1129	0	0	1	0	0	1	2	0	1	0	0	2	1	0	0	3	0	0	0	0	1	5	3	2	6	4	0	0	0	0	0	0	0	0	5	9	4	7	12	5	2	0	2	5	0	0	4	2	0
CD44_1134	5599	4976	7612	7203	6121	5963	4560	4326	8519	8488	7022	7523	6556	6649	4977	4824	6332	6342	6321	7139	6903	6133	5046	5462	4136	4055	8792	6344	4123	4004	6383	6623	6501	7637	7368	8136	5801	5230	5351	5179	8088	8095	4538	4407	7241	6589	5596	6233	7591
CD55_1141	5	3	4	9	4	6	5	3	4	3	12	9	7	3	9	4	7	3	5	5	5	8	15	4	6	3	0	9	5	3	2	2	6	8	3	4	1	2	5	3	3	3	19	8	4	6	3	10	11
CD58_1144	818	710	780	762	830	733	487	469	753	846	637	714	703	611	538	559	777	652	752	836	1330	1258	1402	1324	1058	940	1247	988	990	1027	923	869	983	1020	1297	1545	1096	1017	957	871	1041	998	554	489	1014	899	868	832	1093
CD69_1145	0	0	0	0	0	1	0	0	0	0	1	0	0	0	0	0	0	0	0	0	0	0	0	1	0	0	0	3	0	0	1	0	0	0	1	2	1	0	0	0	1	1	0	0	0	0	0	2	0
CD74_1146	38	28	355	277	453	408	384	342	71	97	813	889	64	78	147	121	46	34	54	66	109	93	132	119	123	165	133	96	114	70	78	64	93	89	313	399	383	364	644	562	87	82	524	726	85	70	167	166	75
CD8A_1152	0	0	2	0	1	0	0	0	0	0	0	0	0	0	0	0	0	0	0	0	0	0	1	0	2	0	0	0	0	0	2	1	0	0	0	3	0	0	2	1	1	0	0	1	0	0	1	0	0
ADGRE5_1154	12	9	25	12	10	12	6	11	15	21	2	9	9	3	7	9	7	6	7	5	9	13	14	10	14	11	4	7	14	14	4	1	3	5	31	25	43	61	90	70	5	6	22	30	2	5	9	9	11
CDA_1155	0	0	0	0	0	0	0	0	0	0	0	0	0	0	0	0	0	0	0	0	0	0	0	0	0	0	0	0	1	0	0	0	0	1	0	0	0	0	0	0	0	0	0	0	1	0	0	0	0
CDC20_1157	132	154	124	153	183	188	110	103	64	64	69	68	57	64	76	89	134	113	82	83	76	98	129	163	126	156	39	16	158	179	61	46	94	76	54	44	72	99	68	68	66	80	50	52	61	40	46	78	180
CDC25A_1158	15	8	9	15	18	7	7	7	11	10	7	7	4	1	8	9	3	12	6	11	29	32	29	27	10	4	1	2	15	14	3	6	24	20	12	11	10	14	16	6	2	2	11	7	11	3	4	13	18
CDC25B_1161	49	48	70	72	80	98	61	32	49	43	93	72	40	58	60	48	50	68	49	53	88	74	130	170	197	206	54	34	92	114	52	39	93	58	73	89	91	86	170	166	37	29	85	112	54	45	63	64	66
CDC26_1162	251	239	479	572	527	485	329	350	399	384	340	302	358	374	347	358	324	284	267	349	294	286	316	341	283	219	344	206	424	289	152	229	247	275	470	526	361	323	289	316	350	312	236	243	288	261	392	421	308
CDC6_1177	255	236	294	273	339	309	131	141	112	129	158	171	97	91	205	206	250	236	364	360	575	574	501	516	271	268	132	106	317	348	83	126	400	384	139	131	263	299	225	236	115	128	181	179	95	57	100	120	370
CDCA4_1183	15	13	32	9	26	20	9	7	9	9	14	4	8	11	17	11	22	11	25	14	28	24	33	39	19	32	15	23	32	24	16	10	31	27	9	7	28	11	13	18	7	5	14	15	9	9	11	6	34
CDCA5_1184	60	42	75	48	67	62	25	31	26	26	32	41	34	16	37	26	60	42	45	48	78	123	111	137	78	72	17	10	81	57	18	21	46	82	33	41	46	51	51	51	32	25	32	32	23	14	25	28	74
CDCA8_1185	24	12	14	22	41	50	26	21	9	15	14	22	17	11	8	17	21	28	22	19	13	18	46	33	59	44	15	8	39	42	6	9	12	26	6	10	18	25	18	20	7	16	18	23	17	9	15	8	34
CDH1_1186	2	1	0	5	7	1	1	1	2	6	3	5	2	4	3	4	6	1	0	2	11	3	3	15	11	11	1	0	5	5	1	1	4	3	7	4	11	6	5	6	0	2	5	1	2	1	4	0	3
CDH3_1191	0	0	4	2	0	0	0	0	2	0	0	0	1	2	0	3	2	3	0	0	0	0	1	0	0	0	0	3	0	1	3	0	2	0	3	0	1	0	1	0	2	0	2	0	1	0	0	0	1
CDH5_1192	2	3	0	0	3	3	0	2	1	0	0	0	0	0	0	0	8	1	2	1	6	6	21	13	5	6	3	4	18	17	6	2	9	7	2	1	3	0	1	1	5	5	2	5	0	1	3	1	3
CDK1_1196	730	728	667	895	1146	1041	547	582	393	580	521	486	537	378	498	508	654	636	732	569	695	828	1429	1565	1011	988	526	523	857	1016	353	421	473	578	266	369	615	515	635	511	585	522	482	375	428	428	307	352	1087
CDK19_1201	149	135	232	263	209	230	166	172	243	275	153	148	226	176	175	177	149	166	121	195	97	97	192	218	166	161	146	140	227	246	132	102	96	116	111	100	147	134	167	131	181	204	147	151	197	152	77	106	202
CDK2_1202	129	108	160	160	147	149	67	89	92	123	80	69	77	79	94	87	100	91	94	100	237	266	280	291	154	141	111	90	164	144	87	76	163	144	97	168	181	115	133	100	95	91	59	65	83	78	90	88	169
CDK4_1203	2463	2547	2523	3000	2714	2954	1582	1782	2270	2604	1907	2171	1655	1537	1941	1952	2368	2098	2081	2173	2603	2524	2958	3312	1930	1817	2113	1564	3062	3107	1402	1384	1693	1962	1556	1701	1828	2176	1625	1493	2093	2117	3339	2941	1499	1365	1149	1149	3324
CDK5_1206	168	168	171	213	171	165	139	126	157	178	193	202	154	154	152	112	184	152	218	160	65	80	112	122	96	111	173	130	187	215	110	131	95	99	44	48	72	67	84	74	192	166	124	98	133	151	81	64	264
CDK5R1_1209	59	37	54	47	34	42	28	26	57	56	39	39	36	25	32	27	53	37	53	28	19	42	20	40	18	19	38	24	59	57	24	31	25	16	17	13	14	14	14	30	32	41	30	37	27	19	16	20	79
CDK6_1213	971	991	789	970	818	860	549	511	726	853	684	647	885	656	612	662	878	820	1165	857	1575	1494	1341	1380	910	797	2367	2312	1772	2315	2063	2152	1678	1938	624	721	803	665	669	498	1608	1642	1432	1002	1530	1419	740	849	1507
CDKN1A_1219	5	4	6	9	4	5	2	5	3	5	9	3	8	14	6	5	3	5	5	12	5	4	10	8	6	3	1	3	9	13	4	4	4	6	8	11	2	6	8	5	15	10	10	9	9	13	7	3	6
CDKN1B_1222	503	422	721	522	631	647	411	355	376	462	482	564	339	392	424	457	439	431	332	533	304	299	390	434	427	416	295	157	612	480	221	173	244	282	313	356	305	273	387	346	298	231	376	458	185	184	212	207	678
CEBPA_1240	2	1	3	3	5	3	3	1	3	6	2	3	5	4	3	6	3	4	2	5	3	0	2	6	2	1	0	3	4	2	2	1	0	1	2	3	1	5	1	0	0	2	4	8	3	1	3	0	5
CEBPD_1242	18	21	44	54	64	48	27	37	51	60	51	55	61	41	33	29	23	18	33	23	70	68	70	47	37	57	200	127	18	33	71	69	41	65	78	81	45	43	57	59	126	144	45	35	95	82	71	72	17
CEBPZ_1245	761	771	836	989	950	952	571	631	835	808	655	672	674	544	619	687	755	707	681	856	1231	1292	1261	1302	813	849	872	749	945	1108	715	682	901	1101	754	803	774	815	726	691	861	742	1143	1105	619	602	590	638	1219
CENPA_1247	8	9	13	11	21	4	23	12	6	0	3	9	14	8	8	5	12	12	9	9	2	4	8	13	12	16	11	1	11	23	5	2	5	14	2	2	5	2	3	7	0	8	9	7	1	5	7	4	15
CENPF_1252	74	43	67	61	108	130	57	62	53	64	56	81	54	42	42	40	75	80	102	56	66	55	101	114	75	92	70	40	119	160	39	46	56	72	31	43	30	29	45	37	48	49	68	73	68	48	32	40	94
CENPW_1256	894	914	814	896	1288	1250	621	598	613	581	499	555	514	417	645	676	899	847	625	673	782	776	1260	1291	902	774	618	530	1007	972	348	396	607	622	400	458	643	722	600	468	608	568	401	350	477	467	408	431	1300
CEP57_1257	242	244	294	289	254	256	180	216	259	274	186	214	185	152	168	175	214	182	183	205	248	251	250	293	208	161	223	217	220	234	135	118	143	149	124	117	149	137	149	167	247	188	279	231	122	114	84	111	301
CERK_1258	0	0	0	4	2	0	0	0	1	1	0	0	2	1	0	0	0	0	2	0	0	0	0	0	1	1	0	3	0	1	0	2	0	0	1	3	0	1	2	0	0	3	0	0	0	2	0	0	0
CES1_1259	3	0	0	0	0	0	1	0	3	0	0	2	0	0	1	0	0	0	0	0	0	0	0	0	1	1	0	1	0	0	0	0	0	0	0	0	0	2	0	0	1	2	3	1	0	0	1	0	1
CETN3_1262	3	3	5	3	1	0	3	0	5	2	6	5	1	0	7	3	4	3	2	2	1	4	2	4	4	4	10	2	1	2	1	6	2	0	0	5	2	2	3	4	3	4	0	0	4	4	2	1	0
CFH_1265	0	1	1	13	0	0	10	1	0	2	0	1	2	2	1	5	0	1	0	0	8	14	11	9	1	7	0	1	3	0	0	1	1	2	74	97	74	85	72	54	2	3	4	4	9	10	35	40	0
CFH_1266	10	10	152	177	109	87	123	114	45	55	24	39	48	70	100	77	12	10	10	10	227	210	258	256	206	200	21	30	43	44	16	23	98	103	2657	2612	2174	2473	2036	1932	81	85	152	126	182	218	901	908	7
CFLAR_1269	112	97	109	129	128	156	61	48	71	104	62	69	64	70	84	82	95	80	98	91	881	871	712	808	367	348	609	529	180	162	604	584	726	746	1514	1615	1240	1301	730	651	456	433	164	123	585	508	886	935	160
CFLAR_1270	18	30	65	63	33	44	31	31	37	44	32	42	53	43	37	37	25	28	45	27	72	62	70	79	54	55	159	136	46	67	203	202	91	91	63	96	83	53	53	48	119	116	65	49	221	203	95	81	46
CGA_1272	0	0	3	1	0	0	0	0	0	0	0	0	0	0	0	0	1	0	0	0	0	0	0	0	0	0	1	1	0	0	1	0	3	0	0	0	1	0	0	0	0	0	0	0	0	0	0	0	0
CGRRF1_1278	14	11	17	19	20	21	9	5	11	17	19	24	22	21	15	8	28	11	12	18	10	7	6	14	12	15	33	24	19	12	16	14	3	10	8	10	12	2	8	3	27	18	28	19	22	14	9	7	14
CHAC1_1279	15	12	6	7	6	3	3	1	6	7	14	12	5	2	13	10	5	12	24	11	2	2	9	8	5	14	5	12	12	14	2	3	9	4	6	3	4	8	10	11	7	1	241	198	1	2	2	2	7
CHEK1_1288	1152	969	1057	1290	1294	1296	647	650	721	792	600	652	554	486	866	846	947	864	1003	1065	2510	2504	1895	2162	1239	1068	845	692	1279	1426	514	504	1484	1676	900	989	1086	1243	965	890	841	707	651	559	530	446	667	634	1595
CHEK2_1289	5	7	15	11	17	9	9	8	17	13	4	9	5	3	4	9	8	12	9	15	8	7	18	10	15	18	13	6	16	7	13	3	6	10	10	17	7	15	11	12	10	7	6	7	8	6	8	2	22
CHERP_1290	117	104	153	149	172	174	86	94	128	188	103	92	113	87	105	119	119	92	107	141	134	188	180	234	127	104	147	138	184	195	106	102	115	132	72	113	103	149	92	109	156	139	135	96	142	109	76	83	179
CHIC2_1295	208	176	270	266	231	280	145	141	272	275	151	198	145	171	187	153	215	165	139	168	268	237	279	308	166	166	312	245	228	166	199	213	197	229	233	320	258	293	236	195	314	258	232	218	212	206	187	179	254
CHMP2B_1301	38	48	53	47	41	57	23	18	61	44	44	46	53	46	35	37	29	49	72	41	41	25	67	61	26	31	51	64	53	74	33	55	42	45	14	38	48	36	27	26	63	44	66	42	32	49	22	27	35
CHMP4A_1304	1333	1483	2119	2340	1927	1932	1378	1503	1859	1902	1479	1620	1352	1192	1444	1348	1584	1173	1266	1301	1374	1465	1601	1742	1277	1052	1538	1240	1545	1632	980	1069	1079	1074	1282	1293	1167	1401	1135	982	1496	1589	2114	2015	1072	1040	867	961	1963
CHMP6_1311	96	61	99	123	74	94	59	77	93	111	99	99	84	76	88	77	74	69	129	78	63	73	74	110	66	72	81	76	97	128	101	87	82	77	81	104	72	77	80	69	83	94	114	55	92	108	68	71	135
CHN1_1312	1030	1123	1389	1622	1441	1574	941	950	1165	1403	925	1098	924	767	906	1035	1182	927	788	904	914	1072	1256	1541	1106	1103	1196	1065	837	805	865	785	721	767	649	778	633	738	713	593	1116	1068	734	658	772	704	485	653	1570
CHRNA4_1328	0	0	0	1	1	0	5	0	1	0	0	0	0	0	0	0	1	0	0	0	0	0	0	0	0	0	0	0	0	1	0	1	2	0	0	0	1	1	0	0	0	0	0	0	0	0	3	0	1
CHUK_1342	44	39	45	49	55	59	40	32	47	52	63	49	29	41	18	20	39	46	32	64	60	39	43	60	34	44	64	45	65	49	52	27	51	64	35	41	29	23	38	35	63	45	58	57	47	47	33	38	46
CIAPIN1_1343	44	26	75	59	57	66	32	38	52	47	44	49	25	40	20	70	36	36	38	53	39	28	34	42	40	29	44	35	39	41	36	28	46	37	39	40	40	30	21	23	48	49	48	46	34	33	47	23	74
CIRBP_1351	9	14	20	36	18	18	12	11	26	22	31	27	28	26	22	17	14	9	33	23	13	15	8	15	7	11	17	12	17	57	12	11	11	19	12	18	11	8	14	13	17	16	32	21	28	14	7	11	25
CISD1_1354	37	41	47	61	63	63	23	24	42	39	59	37	44	33	30	33	41	41	70	44	72	59	44	49	43	40	60	28	53	43	26	43	43	39	33	24	43	35	19	27	43	33	38	41	38	19	16	20	55
CKS1B_1362	255	191	304	301	393	462	188	210	152	166	190	214	126	139	198	192	229	248	174	224	531	476	766	809	435	458	160	137	323	335	176	138	239	349	220	259	311	326	322	348	190	135	320	332	133	126	165	182	364
CLPX_1399	82	68	100	97	105	88	70	71	96	126	140	120	93	86	75	64	60	79	127	116	76	60	86	101	67	71	118	82	112	155	72	63	56	60	33	56	67	46	60	57	74	75	145	102	71	77	36	38	126
CLSTN1_1400	1087	1200	1743	1986	1440	1471	1226	1195	1694	1760	1335	1378	1422	1280	1187	1210	1343	1221	1424	1413	1318	1167	1407	1342	1117	1044	1271	1159	1265	1530	1088	1236	1011	1216	1057	1148	1085	976	982	896	1515	1635	1023	890	1284	1237	911	961	1658
CLTB_1402	419	420	487	520	481	497	289	290	448	420	321	326	320	356	377	368	423	361	346	369	364	384	341	413	320	283	433	345	366	379	248	247	286	293	301	351	261	345	308	223	391	456	338	354	287	265	231	261	519
CLTC_1405	1175	1205	1950	2063	1816	1715	1150	1252	1351	1471	1757	1602	1706	1396	1286	1192	1183	1269	1919	1446	1301	1129	1311	1405	1088	1024	1766	1607	1776	2404	1284	1363	1391	1536	1086	1354	1270	899	1129	1039	1569	1386	1532	1365	1614	1338	1107	1272	1833
CLU_1406	31	26	48	77	32	44	54	42	42	42	46	58	43	24	31	36	77	35	43	36	14	14	9	16	10	10	17	16	13	9	11	21	8	13	17	19	6	10	10	2	12	15	21	11	9	14	12	10	38
CNDP2_1408	0	0	0	3	0	2	1	2	1	1	3	3	3	0	1	1	1	1	0	1	2	0	2	6	4	2	0	2	3	4	3	0	1	0	1	0	1	4	1	2	3	0	0	2	5	0	2	1	0
CNOT4_1427	291	283	533	533	470	439	346	365	403	435	407	431	375	347	336	303	325	327	398	321	425	457	500	543	354	423	555	449	353	419	354	341	404	344	445	480	356	372	439	420	460	422	367	359	435	399	349	383	483
CNPY3_1433	127	103	167	155	162	147	101	88	149	143	179	174	125	127	99	84	133	132	122	127	172	144	175	207	120	158	143	115	189	194	101	90	103	128	105	111	120	114	135	132	135	133	151	169	102	74	82	75	159
COASY_1438	43	34	61	75	46	62	42	39	23	58	47	65	55	32	36	31	37	35	50	55	61	59	85	56	52	39	38	27	50	77	27	36	52	61	60	78	57	35	45	66	48	26	38	48	34	33	57	55	44
COG2_1441	129	131	176	243	213	199	136	148	178	197	185	135	169	127	134	138	174	133	200	165	131	118	153	163	143	143	149	122	158	265	96	95	88	113	96	136	161	123	140	116	141	122	220	129	81	75	85	65	180
COL12A1_1461	136	104	154	184	175	179	79	78	177	191	147	154	157	155	119	121	128	137	212	170	168	164	127	166	87	81	258	228	126	186	200	191	139	142	125	149	101	64	54	57	267	271	77	78	219	218	130	123	214
COL1A1_1466	1198	969	1111	1193	563	459	254	270	1046	1099	360	309	839	837	614	573	1131	1325	1576	1358	1010	864	940	1163	1257	1051	623	521	2292	2671	511	694	759	1086	586	611	371	272	305	318	1249	1265	353	274	820	818	452	528	1453
COL4A1_1472	1167	1267	2029	2178	1407	1568	1067	1134	1653	1786	827	942	1211	1158	1315	1293	1248	1166	1282	1396	4279	4190	3344	3885	2543	2434	1650	1250	2903	2924	2315	2281	2973	3280	5635	5860	4177	4583	3637	3390	2315	2213	1291	1299	2694	2680	3454	3557	1483
COL4A2_1473	415	352	601	628	496	496	339	299	505	567	385	367	493	416	419	401	358	409	488	527	876	867	740	841	750	677	714	457	858	946	657	624	785	889	938	1103	832	721	924	842	579	521	437	432	870	697	701	817	490
CERT1_1476	261	225	321	396	329	364	275	209	302	393	314	328	276	269	204	238	272	224	359	309	226	237	222	259	194	178	306	319	321	322	194	193	224	255	139	211	174	164	212	234	352	280	222	241	200	195	141	174	473
COL5A1_1480	399	426	479	613	321	319	204	220	481	466	202	216	392	363	276	300	398	360	511	434	455	438	454	533	351	336	428	375	561	656	341	370	408	409	332	344	292	271	239	190	477	456	177	134	371	340	291	319	606
COL5A2_1483	447	346	578	555	462	492	326	263	473	601	318	326	500	372	354	310	396	357	376	481	434	439	426	460	297	308	609	425	464	492	475	438	348	479	350	460	367	291	316	222	636	531	178	177	516	459	346	358	522
COPB2_1491	145	146	273	269	275	271	188	191	152	219	273	229	212	199	143	190	183	218	253	175	185	225	182	209	144	167	235	183	249	280	183	174	194	208	156	204	194	113	159	168	184	182	221	197	210	155	169	196	246
COPS5_1497	531	470	601	789	598	753	356	427	563	631	399	483	425	355	460	418	449	458	407	443	470	503	637	654	386	371	587	550	563	509	361	364	384	362	463	471	461	549	367	360	566	498	470	427	362	367	320	355	603
COPS7A_1498	15	16	25	41	28	19	10	16	20	30	17	21	17	15	19	16	11	16	21	13	22	11	33	22	10	9	26	18	28	24	7	9	14	14	16	23	25	13	10	9	18	22	21	12	20	17	8	9	37
COPZ1_1499	465	447	614	585	520	575	365	372	459	576	549	582	447	428	383	410	537	464	477	483	384	347	348	441	275	299	546	500	558	579	383	404	339	452	250	302	257	250	238	227	480	426	391	372	479	372	282	312	560
COQ5_1506	73	58	88	111	83	94	60	65	80	68	71	89	50	60	50	52	76	46	65	81	39	53	70	87	57	60	61	63	83	98	34	47	50	58	41	43	37	40	41	38	75	56	77	91	61	43	30	23	79
CORO1A_1507	9	7	6	10	5	4	4	3	3	3	5	5	3	4	2	10	5	3	9	7	5	1	5	4	4	5	5	0	8	6	2	9	3	3	1	0	2	1	6	3	6	11	3	1	6	4	4	5	11
COX6B1_1519	57	43	101	84	100	72	59	55	71	68	83	99	98	65	58	63	87	60	71	62	46	43	67	68	55	46	101	62	75	57	69	63	56	60	40	57	41	30	49	58	71	70	49	43	87	89	56	64	96
COX6C_1522	0	0	1	0	1	0	0	0	1	0	1	3	0	1	0	0	0	0	0	0	0	1	0	0	0	0	0	4	0	1	0	0	0	0	3	0	0	0	0	0	0	0	0	0	0	0	0	0	0
CPNE3_1532	1024	929	1303	1449	1252	1353	892	1015	1342	1499	1140	1096	1036	968	845	962	1113	1006	1050	1072	752	770	913	1005	697	705	1371	1197	1087	1297	792	838	670	758	567	629	608	658	591	567	1153	1172	926	834	840	799	561	636	1390
CPSF4_1539	93	88	103	159	107	114	53	84	118	116	113	127	106	83	68	57	65	78	146	72	80	80	77	83	60	54	64	86	127	196	54	74	53	68	62	55	66	58	45	50	103	78	219	121	42	53	38	26	109
CREBBP_1553	14	16	18	37	13	18	23	16	11	22	20	12	30	13	6	20	10	12	28	15	23	12	20	22	13	18	5	6	18	33	11	15	18	14	12	16	18	13	16	15	24	15	14	17	14	6	13	20	14
CREG1_1558	119	99	169	201	133	123	101	92	177	194	133	114	160	137	104	126	104	127	120	117	75	113	99	110	92	109	178	162	137	136	87	112	90	93	128	151	115	130	134	156	179	152	135	124	115	106	100	81	155
CRELD2_1561	65	59	92	179	110	92	70	84	65	73	105	63	102	58	64	64	45	65	282	65	59	67	88	120	58	55	62	131	58	269	59	82	70	60	48	60	99	72	66	64	72	78	87	28	62	71	36	57	85
CRK_1571	43	38	44	56	64	63	39	40	51	59	34	70	61	45	43	46	33	44	54	42	45	40	28	76	26	39	74	52	52	75	39	55	43	34	43	54	35	48	29	35	65	60	68	41	75	56	34	53	48
CRTAP_1578	3	6	7	10	9	10	4	9	7	19	10	7	14	7	10	12	7	9	20	8	5	3	2	15	4	4	2	4	11	19	6	6	7	4	4	4	1	2	1	2	9	3	1	3	5	3	2	8	16
CRYAB_1582	10	8	5	10	3	6	0	0	5	5	4	1	2	1	2	4	2	4	5	12	0	1	2	2	0	0	12	5	0	0	2	5	1	5	0	1	3	1	0	0	3	3	0	1	4	3	0	7	4
CRYZ_1586	283	224	360	321	404	437	263	232	299	304	266	286	196	185	225	242	254	242	189	262	260	234	289	293	193	168	377	255	288	219	185	196	186	228	216	261	289	270	255	245	323	286	204	233	205	175	144	155	316
CSF1_1590	0	0	4	3	3	1	1	1	2	5	1	2	0	4	0	3	0	0	0	0	4	2	1	3	2	1	0	0	1	1	2	3	1	3	4	1	7	4	8	4	3	10	1	3	10	0	2	3	0
CSF3_1592	1	0	2	0	0	0	2	4	0	0	2	1	0	0	2	2	2	1	3	5	9	4	6	8	15	20	11	7	0	0	11	4	1	2	31	20	19	19	34	20	1	3	0	5	1	2	11	4	0
CSNK1D_1599	933	937	1296	1331	1153	1073	788	788	1143	1196	1037	1044	1064	957	846	823	959	801	918	946	882	863	1082	1160	816	808	1108	957	1139	1251	907	986	762	926	962	1045	951	865	923	916	1278	1201	1085	963	1252	1203	856	836	1275
CSNK1E_1602	1	5	4	0	0	1	0	2	5	2	4	0	2	0	2	3	1	1	3	0	8	1	1	2	2	4	3	1	1	3	9	3	2	1	3	0	4	2	4	1	2	2	6	2	4	2	1	2	7
CSNK2A2_1609	97	91	124	184	157	124	95	107	125	164	93	120	92	102	82	89	127	103	125	100	105	81	111	110	104	79	89	86	109	145	93	76	98	104	56	87	84	104	71	64	73	103	176	153	93	98	63	68	166
CST6_1613	2	0	0	1	0	0	0	3	0	0	1	2	0	0	0	0	0	0	0	0	0	1	2	0	0	0	0	0	1	0	1	0	2	0	0	0	0	1	0	0	0	1	0	0	0	0	0	1	0
CT45A6_1618	0	0	0	6	1	4	1	1	0	1	0	3	0	1	0	2	0	0	2	1	0	0	1	0	0	2	0	0	3	1	1	1	0	2	1	0	1	1	1	1	2	1	0	0	2	1	0	0	1
CTHRC1_1625	0	0	0	1	0	0	1	1	0	0	0	0	1	1	0	0	0	0	0	0	0	0	1	1	1	0	0	0	2	0	0	0	0	0	0	0	0	1	0	0	0	1	2	0	0	0	0	3	0
CTNNAL1_1630	262	236	253	267	301	344	167	154	248	286	200	176	211	199	202	215	277	231	216	320	357	446	369	479	243	243	562	371	384	274	393	339	343	359	189	275	205	236	163	168	403	402	270	256	334	290	200	261	327
CTNNB1_1633	2098	2058	3418	3710	3166	3036	2197	2096	3020	3310	2481	2549	2505	2385	2093	1999	2264	2100	2302	2564	2687	2426	2670	2864	1896	1916	3423	2715	3154	3594	2052	1987	2021	2370	2420	2622	2939	2774	2424	2193	3102	2832	2011	1845	2349	2136	1717	1948	2989
CTPS1_1637	7	5	3	5	6	7	0	2	4	8	2	4	5	8	6	2	3	6	5	3	7	8	7	18	14	17	7	6	3	9	3	7	6	7	4	4	7	7	3	4	6	2	8	11	4	7	5	7	9
CTSD_1642	51	57	82	132	65	76	60	76	83	105	163	118	115	72	56	63	46	75	159	78	64	47	94	84	60	65	99	99	73	182	69	91	51	61	41	48	60	52	43	59	92	69	158	105	86	97	41	51	78
CTSG_1643	0	0	0	0	1	0	0	0	2	0	0	0	0	0	0	0	0	1	0	0	0	0	0	0	0	0	0	0	0	0	0	0	0	0	0	0	0	0	0	0	1	1	0	0	0	0	0	0	0
CTSL_1645	443	466	650	654	462	496	354	372	668	700	388	509	459	447	478	423	475	402	370	465	465	433	511	576	499	502	492	421	435	440	342	323	312	357	365	408	453	544	588	592	581	638	566	587	362	344	304	346	623
CTSL_1647	18	8	28	25	12	13	12	19	18	26	29	23	29	16	11	14	21	25	13	29	14	20	29	24	29	13	16	9	25	26	17	19	23	22	14	22	26	14	31	29	43	23	38	43	18	21	19	11	22
CTTN_1650	328	243	372	443	343	317	207	225	349	364	281	312	299	323	316	276	287	254	294	312	370	364	310	311	273	236	386	263	351	377	303	322	328	422	322	451	318	296	287	278	364	315	293	334	387	367	338	391	417
CXCL12_1666	0	0	0	0	0	0	0	0	0	2	0	3	0	0	0	0	0	0	0	4	1	0	0	0	0	1	3	0	2	2	0	0	0	0	0	0	2	0	0	0	2	0	0	0	0	0	0	0	1
CXCL12_1667	37	29	46	56	36	50	29	25	44	42	59	53	37	22	22	24	39	51	55	31	20	25	27	36	45	30	29	38	78	130	16	11	8	10	10	6	18	12	17	23	34	28	40	22	15	17	3	4	66
CXCL12_1668	0	0	0	3	0	2	0	1	0	0	0	0	0	0	0	1	0	0	0	2	0	0	0	0	0	0	0	2	0	1	0	2	1	0	0	0	0	0	0	1	0	0	0	0	0	0	0	0	2
CXCL12_1669	14	9	17	12	27	18	18	11	17	19	21	24	6	6	6	6	14	10	10	12	5	7	5	9	13	15	16	15	35	23	4	3	2	4	3	1	5	1	8	1	8	11	8	7	7	5	2	3	15
CXCL2_1672	0	0	1	0	1	0	1	0	0	1	1	0	0	3	1	3	1	7	4	3	10	13	18	23	24	16	55	14	7	2	16	21	6	26	13	27	19	6	6	20	38	31	4	6	29	31	28	31	1
CYB561_1683	7	17	25	22	19	11	8	12	11	15	21	16	14	11	11	9	5	8	20	9	14	8	9	10	13	8	8	9	12	14	13	16	17	13	8	17	13	20	14	18	11	18	13	9	15	9	2	6	9
CYCS_1692	238	234	267	306	284	283	165	160	277	301	214	169	200	169	205	195	255	210	209	214	209	195	149	198	81	79	294	293	169	163	206	198	159	226	92	142	93	98	56	58	259	255	169	185	182	203	124	134	331
CYP11A1_1693	0	0	0	0	0	0	0	0	0	0	0	0	0	0	0	0	0	0	0	2	0	1	0	0	0	0	0	0	0	0	0	0	0	0	1	0	0	0	0	0	0	3	2	0	0	0	0	0	0
CYP1A1_1698	0	0	0	0	0	0	1	0	0	1	1	0	1	0	0	0	1	0	0	0	0	0	0	1	1	1	0	1	0	1	0	0	1	1	0	0	1	0	1	0	0	1	0	0	0	0	0	2	1
CYP1A2_1699	1	0	0	0	0	0	1	0	0	1	0	0	3	0	0	2	0	1	0	0	0	0	0	0	0	0	0	0	3	0	0	0	0	0	0	1	0	0	2	0	0	0	0	0	0	2	0	0	0
CYP26B1_1706	0	0	0	0	0	0	0	1	1	0	1	0	0	0	0	0	1	0	0	0	1	0	1	0	0	0	0	0	0	0	0	0	0	0	0	0	1	0	0	0	0	0	0	1	1	0	2	2	0
CYP2B6_1710	0	0	0	0	0	0	0	1	2	0	0	0	0	0	0	0	0	0	0	0	0	0	0	0	0	1	1	0	0	0	0	0	0	1	0	0	0	0	0	0	0	0	0	0	0	0	2	0	0
CYP2C19_1714	1	0	0	1	0	2	0	1	0	2	0	0	1	0	1	0	0	0	2	3	0	0	1	1	0	0	1	0	1	2	0	0	0	0	1	0	0	0	0	0	2	2	2	0	0	0	0	0	1
CYP2C9_1720	0	0	0	0	0	0	1	1	3	0	0	0	2	0	0	0	0	0	0	0	3	2	1	1	0	0	0	0	0	0	0	0	1	1	0	1	3	1	0	0	0	1	0	0	0	0	0	2	0
CYP2E1_1722	39	45	136	126	105	103	81	83	105	129	87	97	77	63	95	113	69	70	91	91	49	54	48	33	54	36	94	72	58	52	81	68	69	65	45	71	29	30	28	29	118	70	61	50	111	75	46	53	68
CYP4F3_1739	0	0	0	0	0	0	0	0	0	1	0	0	0	0	0	0	0	0	0	0	0	0	0	0	0	0	0	0	0	0	0	0	0	0	0	0	0	0	0	0	0	0	0	0	0	0	0	0	0
CYTH1_1748	1	4	6	1	1	3	0	0	3	0	1	2	6	0	0	1	0	2	1	3	2	2	2	2	1	1	0	1	2	5	1	0	1	3	2	1	2	1	2	0	3	1	4	4	0	3	0	0	2
DAD1_1749	375	338	534	536	548	559	351	327	387	443	514	469	423	458	363	313	431	397	514	491	459	412	433	536	333	339	565	501	544	599	347	418	478	496	395	458	333	266	284	244	490	402	359	351	449	393	323	392	519
DAG1_1750	416	377	470	553	497	479	342	374	466	520	468	453	438	376	357	343	353	369	533	490	410	344	413	469	327	340	348	347	441	500	305	322	317	391	200	246	255	228	257	249	476	451	268	202	413	350	185	240	517
DAPK1_1752	19	20	24	37	13	36	18	17	13	37	22	30	33	31	18	14	13	14	28	19	30	50	44	39	18	28	31	21	22	23	24	17	16	27	42	70	30	19	21	18	15	23	45	46	39	25	40	27	19
DAXX_1756	772	780	965	1111	1027	1099	608	666	762	875	656	721	700	607	743	736	849	709	752	776	1890	1749	1633	1688	1087	961	1238	1047	1192	1294	1266	1258	1557	1625	1651	1715	1452	1567	1155	1089	1290	1218	956	920	1176	1174	1144	1262	1119
DBH_1758	0	1	0	2	0	0	0	0	0	0	0	0	0	0	0	0	0	0	0	0	0	0	0	0	0	0	0	2	0	0	0	0	0	0	0	0	0	0	0	0	2	1	0	0	0	0	0	0	0
DCK_1776	284	308	365	399	409	419	232	185	320	324	182	206	177	207	241	244	337	325	168	280	507	544	558	570	298	236	382	285	269	209	180	142	305	325	384	377	365	464	371	359	342	241	147	121	182	161	231	243	366
DCN_1779	0	0	0	0	0	0	0	1	1	0	0	0	0	0	0	1	0	0	0	0	0	0	1	0	0	0	0	0	0	0	0	1	0	0	0	0	0	0	0	0	0	1	0	0	0	0	0	1	0
DCTD_1785	946	831	1207	1237	1092	1101	686	642	1019	1115	874	967	836	857	805	792	865	841	910	875	1126	1098	1037	1087	839	764	963	815	1033	1180	686	664	868	953	862	933	809	868	726	695	936	885	1227	1272	798	716	664	683	1224
DCTN6_1789	1386	1251	1998	2102	1727	1833	1228	1227	1810	2021	1403	1518	1557	1251	1374	1348	1348	1258	1383	1519	1555	1626	1516	1676	1147	1009	2104	1763	1460	1652	1297	1218	1253	1372	1432	1698	1285	1353	1102	1087	1689	1808	1387	1208	1408	1293	1084	1096	1760
DCUN1D4_1795	94	67	101	133	105	72	66	49	85	96	101	56	110	89	86	63	69	81	89	95	83	50	103	108	67	63	113	100	102	140	117	117	93	98	66	52	68	63	71	69	107	95	157	149	139	132	61	51	132
DCX_1796	3	2	7	6	2	3	2	7	6	9	4	2	3	5	0	1	8	3	4	9	1	3	6	11	4	7	6	7	3	2	5	8	9	5	0	5	1	2	3	3	3	6	8	5	6	3	1	11	6
DDB2_1798	20	10	40	24	34	26	20	30	16	18	35	27	25	20	18	22	7	32	27	21	21	20	44	33	24	26	24	16	35	62	5	11	5	17	13	13	21	9	22	16	27	15	35	27	13	20	2	6	34
DDIT3_1800	232	191	241	313	308	274	275	381	253	261	287	290	216	207	217	223	334	244	206	235	154	192	281	352	270	317	151	120	239	250	135	120	136	186	125	126	217	211	287	279	134	125	2165	1997	127	126	112	152	338
DDIT4_1803	0	1	1	0	3	2	2	4	0	0	1	1	1	1	0	2	6	2	0	1	3	0	0	0	0	0	0	0	0	1	0	0	0	2	3	2	0	2	0	1	0	0	3	0	1	1	0	0	2
DDR1_1804	184	181	250	363	280	237	185	202	300	378	242	252	295	224	168	252	239	178	399	240	196	177	221	247	153	149	95	92	170	232	201	232	170	192	142	173	161	140	100	104	263	265	162	103	226	225	122	109	230
DDX42_1819	9	1	6	11	8	3	5	2	2	7	17	4	6	14	4	5	1	7	11	7	6	2	4	5	4	2	8	3	10	12	2	3	4	4	3	5	3	5	3	7	3	6	7	4	4	2	6	4	8
DEFB4A_1838	0	0	0	0	1	0	0	1	0	0	1	0	0	0	0	0	0	0	0	0	0	5	0	0	0	0	0	2	0	0	0	0	0	0	0	0	0	0	1	0	3	2	3	0	0	0	0	0	0
DEK_1841	1792	1617	2275	2280	2593	2543	1225	1246	1382	1534	1299	1380	1183	1176	1475	1441	1690	1528	1675	1733	4027	3806	4248	4348	2611	2681	1700	1323	2539	2650	1052	1175	2435	2685	2606	2901	2942	2847	2435	2363	1589	1408	2285	2122	1144	1029	1507	1748	2448
DEPDC1B_1847	315	292	341	331	479	522	223	264	219	240	155	201	190	154	188	191	304	285	227	218	306	263	483	545	357	360	247	197	377	412	122	141	214	190	139	149	186	249	262	212	274	233	175	172	112	140	125	127	446
DERA_1848	4	6	7	6	2	3	3	3	1	7	5	7	1	6	5	1	1	0	1	9	4	6	7	3	2	1	2	0	9	3	5	6	2	1	2	3	8	1	4	2	2	2	3	2	3	4	2	4	7
DES_1849	0	0	5	1	0	1	0	0	0	1	0	0	0	0	0	0	0	0	0	0	0	2	2	0	0	0	0	0	1	1	0	0	0	0	0	2	1	0	4	2	0	0	0	0	1	0	1	0	0
DFFA_1850	10	9	6	12	11	6	10	10	12	8	11	17	12	10	11	9	7	8	9	19	12	9	15	14	9	5	8	6	15	27	5	5	7	8	9	7	10	7	5	4	13	16	13	25	9	3	5	7	11
DFFB_1853	64	62	100	90	100	102	107	104	63	101	86	86	93	124	107	88	117	99	75	90	81	75	107	116	88	73	92	59	102	109	75	86	65	74	46	62	28	73	58	49	77	101	50	56	59	69	60	54	154
DHDDS_1856	153	149	179	173	157	204	138	130	176	217	176	161	149	156	136	166	129	119	135	141	157	194	188	241	155	121	166	143	149	182	139	124	129	139	159	165	174	171	159	151	159	154	203	169	146	142	119	140	219
DHRS2_1857	0	1	0	2	2	1	2	0	3	4	0	2	1	0	1	2	0	1	0	0	0	0	2	0	3	0	0	0	4	2	0	0	0	0	0	0	0	1	1	0	0	1	4	3	2	0	0	1	0
DHRS7_1861	172	106	216	205	169	152	124	93	175	164	208	171	158	215	139	124	150	158	165	187	155	121	119	130	109	120	292	224	200	190	136	158	163	189	103	115	80	66	64	87	194	180	111	127	174	167	105	113	199
DLAT_1875	846	802	897	950	1121	1059	602	647	753	808	678	675	633	548	687	691	723	727	741	752	703	667	961	966	630	651	904	702	827	926	605	612	539	633	444	517	643	618	616	654	695	712	815	782	566	499	383	382	1126
DLD_1877	1	2	4	4	0	0	2	1	1	6	0	5	6	0	2	1	3	0	0	0	2	4	1	4	0	1	6	2	4	3	2	3	2	4	1	3	1	2	0	1	9	0	6	2	4	5	1	2	1
DLG4_1880	82	69	80	105	90	93	79	59	70	86	95	69	59	50	58	59	82	54	98	76	61	47	68	61	62	49	48	54	78	112	52	42	55	66	29	39	54	37	53	45	67	72	79	57	49	47	23	26	89
DLGAP5_1882	251	191	280	212	449	434	163	153	168	188	156	209	127	155	139	131	207	216	161	184	159	153	287	292	271	287	180	139	388	253	93	84	121	144	71	92	102	129	111	118	136	155	88	111	96	81	82	82	330
DMTF1_1887	45	38	73	70	63	51	35	39	42	66	64	66	56	47	31	42	54	39	51	50	62	40	42	40	27	30	56	38	48	43	50	60	45	45	39	50	38	43	48	45	52	49	100	70	76	65	36	34	54
DNAJA3_1895	11	5	2	8	3	6	2	3	13	10	7	1	5	6	8	9	2	8	8	14	4	5	9	10	2	8	12	7	10	11	2	9	10	4	7	9	8	12	5	7	7	4	22	14	6	8	4	6	6
DNAJB14_1905	294	246	368	378	364	364	299	327	336	339	394	361	339	288	296	235	294	252	385	290	260	264	338	301	305	261	404	333	349	498	272	329	268	292	200	298	293	242	272	292	347	282	420	375	366	277	208	265	417
DNAJB2_1906	0	0	0	0	0	0	0	0	0	3	0	0	0	1	1	0	0	0	2	0	0	0	1	0	0	1	0	0	0	1	1	0	0	0	0	0	0	0	0	0	0	0	3	0	0	0	0	1	1
DNAJB6_1912	339	279	463	520	452	489	251	270	399	499	322	354	331	342	311	341	361	289	283	348	847	748	791	939	566	552	816	767	448	394	780	724	604	728	2169	2163	1421	1419	925	817	805	829	377	368	870	747	901	975	431
DNM1_1924	263	220	344	388	310	246	206	200	370	492	320	375	350	312	241	232	278	338	451	357	313	231	254	280	205	232	379	378	515	626	276	349	295	305	126	150	119	79	105	106	379	355	242	188	321	272	146	140	385
DNM1L_1927	394	328	477	474	525	477	308	325	395	432	392	452	361	320	398	311	374	292	348	406	391	431	504	569	391	371	515	346	529	509	367	382	388	478	442	531	461	423	454	435	378	369	438	421	417	364	349	395	498
DNMT1_1928	7	12	12	5	7	18	3	7	10	17	7	8	5	5	5	3	5	5	6	2	22	11	18	28	3	13	0	3	16	12	8	0	10	8	3	7	18	12	9	15	3	11	8	4	9	6	6	7	12
DNMT3A_1932	2	2	3	1	9	10	5	5	1	3	8	2	1	8	5	6	5	10	4	9	1	1	4	4	2	3	0	0	2	3	2	3	1	2	5	6	1	2	4	6	4	0	4	2	5	2	2	0	8
DNTTIP2_1936	572	539	659	754	682	730	360	432	577	627	418	534	493	461	496	495	560	466	460	553	658	755	723	901	512	471	698	624	680	723	523	542	584	569	519	589	548	650	533	481	681	574	604	567	546	550	405	421	809
DPM2_1947	158	144	216	238	189	176	111	123	160	224	183	165	143	139	133	156	194	166	207	224	182	191	210	235	143	143	152	143	192	215	136	132	149	181	102	154	134	108	141	147	145	148	230	165	145	160	113	124	212
DRAP1_1957	81	68	140	109	147	152	81	67	82	84	104	89	83	76	88	88	79	81	74	118	240	190	230	256	185	179	86	45	114	85	111	104	189	205	164	255	194	181	177	178	90	97	98	135	136	120	141	157	95
DRD2_1959	0	1	0	0	0	0	0	1	1	0	1	0	0	1	0	0	0	0	0	0	0	0	0	0	1	0	0	0	0	0	1	0	0	0	1	1	0	0	0	0	0	2	0	1	0	0	0	0	0
DSG2_1967	51	38	78	61	59	64	30	37	39	66	69	59	67	53	52	42	51	34	90	59	37	37	60	53	41	44	71	76	60	84	32	39	40	50	27	36	38	28	52	27	86	55	100	88	74	67	24	34	74
DUSP1_1978	36	32	35	46	62	52	27	15	64	58	31	26	44	28	31	45	38	15	21	28	22	20	31	24	10	16	200	145	17	21	76	53	35	47	27	37	34	25	17	22	124	112	25	32	81	67	49	50	46
DUSP11_1981	47	39	54	102	62	55	56	46	70	50	100	86	96	62	38	41	28	47	136	56	47	40	50	90	47	51	76	106	85	183	60	72	48	52	29	51	65	46	59	69	77	90	113	52	77	61	35	61	72
DUSP22_1986	239	178	413	490	335	360	264	264	388	480	302	266	401	334	234	279	220	213	255	225	385	374	336	328	223	249	313	241	261	401	348	300	318	362	585	624	437	365	277	320	445	428	242	234	562	471	362	435	282
DUSP3_1987	930	872	1156	1190	1086	1128	701	695	1119	1239	889	1017	904	793	762	766	801	791	673	702	833	992	952	1174	678	705	1860	1589	815	888	1086	1101	781	842	630	833	682	784	586	544	1424	1239	879	894	1070	915	571	688	1229
DUSP4_1990	2	1	2	0	5	2	3	4	0	3	1	1	0	1	0	1	3	0	2	2	2	5	5	1	2	2	6	7	8	7	6	7	6	3	4	1	2	1	3	2	1	3	5	3	4	5	7	4	2
DUSP6_1993	4	5	5	1	5	6	0	3	2	2	1	3	0	1	0	2	2	2	6	1	1	3	4	9	7	3	6	4	10	7	6	2	13	8	13	26	22	5	6	14	6	5	23	18	12	8	15	25	8
DYNLL1_1997	2381	2277	3291	3629	3013	3115	1969	1985	2371	2458	2098	2227	2207	2023	2105	2153	2432	2300	2592	2296	1711	1517	2495	2656	2346	2168	2418	2202	2399	2655	1683	1802	1543	1697	1579	1846	2303	2123	2192	2052	2388	2223	2341	1933	2053	1768	1244	1373	3009
DYNLT3_2000	248	254	354	391	329	307	212	230	308	345	195	249	241	218	222	238	225	233	213	259	260	272	289	297	228	169	377	279	292	295	246	217	189	240	242	288	238	255	235	211	384	299	317	285	266	217	193	259	407
DYRK3_2006	287	258	414	410	327	344	271	299	394	438	267	290	269	224	257	235	262	273	288	296	258	284	319	340	304	245	376	334	296	326	256	222	190	236	235	235	180	191	181	187	404	353	348	345	287	242	192	208	442
E2F1_2008	2	5	2	3	8	0	0	0	2	0	4	3	0	0	0	2	6	1	0	4	3	3	7	4	0	2	3	1	3	2	0	0	1	1	2	2	1	3	2	0	2	1	1	1	2	1	1	5	1
E2F2_2009	0	1	0	1	0	2	0	0	0	0	0	0	0	0	0	0	0	3	0	0	0	0	2	1	0	0	0	0	0	1	0	0	0	0	0	0	0	0	0	0	0	0	0	0	0	0	0	0	1
EBNA1BP2_2014	1324	1234	1539	1769	1599	1693	818	928	1178	1278	885	977	919	825	1106	1148	1350	1185	1339	1379	1695	1944	1677	1790	1066	950	1256	1037	1566	1712	1005	991	1320	1547	1218	1334	1164	1319	917	842	1225	1247	2110	1790	1076	880	965	1111	1893
EBP_2015	204	173	234	244	258	268	166	170	147	139	180	211	130	154	127	144	210	222	140	165	159	134	267	177	195	158	173	127	259	236	96	105	133	162	79	92	103	97	136	115	157	108	95	81	142	102	53	75	252
ECD_2021	468	472	626	634	511	534	396	469	504	617	451	435	462	408	454	429	465	459	497	467	477	516	573	661	418	424	595	576	518	647	441	450	439	429	404	498	464	477	422	408	579	511	628	505	486	459	382	402	681
ECH1_2022	112	94	121	140	116	104	111	94	137	146	128	170	111	109	103	97	90	128	102	134	78	66	63	55	65	49	127	125	130	125	78	104	76	90	51	45	46	42	43	67	132	129	140	126	98	89	64	74	158
ECSCR_2024	0	0	0	0	0	0	0	0	0	0	1	0	0	0	0	0	0	0	0	0	0	1	0	0	1	0	0	0	0	0	0	0	0	0	0	0	1	0	0	1	0	0	0	2	0	0	0	0	0
EDEM1_2027	26	27	57	44	48	34	18	31	39	37	42	43	25	30	29	23	32	38	37	49	51	40	43	67	59	41	39	28	59	59	26	30	45	51	30	40	41	28	59	36	46	47	58	80	25	34	35	40	58
EDN1_2029	321	291	113	98	275	270	53	62	152	200	126	141	171	164	144	131	167	181	161	198	268	337	571	635	188	223	732	642	172	197	632	627	501	518	511	641	688	706	299	283	557	513	215	217	898	824	656	696	541
EED_2035	71	53	117	94	125	116	58	52	62	88	70	90	46	68	83	66	94	73	46	72	172	146	145	163	129	120	130	80	154	72	69	63	115	141	92	113	108	91	97	111	77	53	47	71	57	65	63	69	94
EEF2_2042	1904	2078	2226	3220	2077	2014	1417	1671	2369	2479	1978	1600	2882	1831	1440	1586	1845	2010	3641	2112	1807	1424	1815	1958	1167	1040	761	1203	2186	4040	1623	2122	1798	2070	1555	1610	2198	1482	1356	1292	1997	2552	2608	1532	1997	2357	1158	1441	2484
EFNA1_2049	11	16	23	21	7	11	8	11	15	14	20	20	4	6	5	7	25	14	9	24	47	69	83	110	58	44	247	172	26	24	98	89	46	53	112	125	63	50	30	34	263	209	13	9	139	120	102	81	15
EGF_2055	176	147	284	379	236	227	197	222	284	350	189	209	199	141	181	181	217	148	154	159	230	271	271	314	219	236	310	258	129	154	171	152	178	139	225	275	214	258	236	230	302	279	153	151	143	162	160	142	299
EGFR_2063	69	47	66	55	70	84	27	28	67	74	57	60	56	41	49	46	95	65	46	73	218	231	245	306	156	163	53	64	192	182	196	151	198	183	153	141	146	144	118	109	95	82	86	115	176	125	133	128	117
EGR1_2068	51	53	54	82	108	110	40	28	127	147	72	59	53	55	34	52	51	58	89	81	42	30	46	74	37	40	217	250	111	125	108	111	83	99	14	8	30	37	17	30	159	124	62	56	89	97	30	20	95
EIF1_2074	1638	1553	1915	2205	2089	2213	1136	1241	1913	2131	1143	1290	1481	1236	1377	1285	1483	1321	1234	1375	1541	1644	1699	2011	950	933	2337	2074	1524	1738	1540	1409	1308	1502	1938	2140	1725	1991	1270	1258	2233	2172	2970	2770	1741	1691	1498	1595	2116
EIF1AY_2080	0	0	2	0	0	0	0	0	0	0	0	0	0	0	0	0	0	0	0	0	0	0	0	0	0	0	0	0	0	0	0	0	0	0	0	0	0	0	0	0	0	0	0	0	0	0	0	0	0
EIF2S1_2085	1343	1330	1725	1979	1734	1808	944	976	1357	1469	1000	1217	1097	995	1206	1348	1281	1168	1186	1370	2044	2066	2005	2127	1169	1215	1507	1280	1645	1770	1236	1177	1523	1692	1551	1732	1554	1747	1198	1179	1430	1427	2020	1993	1208	1096	1194	1371	1897
EIF2S2_2088	51	62	67	75	96	76	32	44	73	66	66	55	72	79	62	57	47	68	93	79	101	87	91	71	47	57	74	103	78	138	57	66	84	112	88	93	110	67	65	88	78	67	253	186	97	68	93	90	74
EIF3C_2092	20	22	33	31	18	48	30	48	21	26	35	14	28	16	21	29	31	31	34	33	11	16	23	22	29	16	21	16	28	34	20	24	15	19	10	18	25	15	21	24	30	21	11	17	19	18	15	26	28
EIF3D_2093	179	142	199	223	148	189	77	113	164	157	161	163	128	150	122	123	168	185	173	159	211	185	171	202	119	143	233	163	191	205	130	154	201	217	125	152	152	136	116	126	204	207	201	123	168	150	138	129	195
EIF3E_2094	4366	4811	4903	5562	4786	4867	3164	3326	5704	5749	3289	3662	3997	3505	3572	3695	3989	3740	3384	3771	4161	4064	4103	4525	2686	2571	5055	4240	4560	4793	3302	3315	3105	3443	3907	4011	3288	3898	2543	2360	4931	4802	3269	3021	3484	3119	2741	2918	5790
EIF4EBP1_2107	0	0	0	1	0	0	0	0	3	0	1	0	0	1	1	1	3	0	0	0	1	1	0	0	1	0	3	0	2	0	0	0	0	2	0	0	0	0	0	1	0	0	1	2	0	0	0	0	1
ELAC2_2114	23	23	25	37	16	31	10	27	27	31	25	12	25	21	23	15	29	25	29	24	14	26	17	38	22	31	21	10	28	29	14	19	23	15	11	26	22	24	22	7	23	27	28	27	16	13	8	10	40
ELAVL1_2115	48	61	82	81	49	59	37	44	58	75	57	35	47	27	31	45	67	34	48	79	65	55	74	56	45	44	107	66	63	47	64	45	32	25	47	30	35	30	32	21	97	82	52	42	75	69	28	36	93
ELMOD1_2126	1	0	5	6	5	9	0	4	2	3	8	14	6	4	6	3	3	2	3	2	0	1	3	0	2	1	1	3	1	0	1	2	0	0	0	1	0	0	0	1	4	1	3	1	3	1	3	3	1
ELOVL6_2134	50	45	39	46	58	68	32	35	50	27	40	80	34	20	35	30	48	44	48	45	54	55	62	95	62	39	25	29	74	57	31	21	68	59	39	38	47	42	53	54	41	35	26	42	26	24	23	25	76
EML3_2142	0	1	0	1	0	3	0	3	1	0	0	0	0	0	1	0	0	1	0	0	2	1	0	0	0	0	0	1	0	0	0	0	1	0	0	0	2	0	0	1	0	0	0	0	0	0	0	1	0
ENG_2149	6	4	12	3	10	12	5	5	11	9	15	6	3	5	15	4	4	13	7	5	9	6	8	15	11	17	9	6	14	13	6	15	8	3	4	3	11	7	11	21	7	7	14	17	6	5	6	7	14
ENO2_2153	28	30	52	19	41	20	27	10	38	30	41	38	36	25	22	26	29	32	29	39	21	23	61	49	37	33	34	29	43	40	23	23	30	20	21	20	50	55	65	47	38	27	26	33	36	25	6	13	33
ENOPH1_2156	759	724	941	993	875	891	559	516	795	840	662	757	666	590	630	692	719	722	705	837	979	993	953	994	566	631	639	481	746	794	530	565	711	893	564	652	641	669	524	503	801	739	741	768	666	567	505	472	975
ENOSF1_2157	7	1	1	9	10	7	13	7	12	3	7	6	8	6	7	4	10	5	9	9	1	8	9	1	7	6	9	4	5	10	4	1	6	0	4	4	5	2	3	3	6	8	12	22	5	1	0	1	9
EOMES_2164	1	0	0	0	0	1	0	0	0	0	0	0	0	1	0	1	0	0	0	2	0	0	0	1	0	0	0	0	1	0	0	0	0	1	0	0	2	0	0	0	0	0	0	1	1	0	0	0	1
EP300_2167	586	555	818	800	749	733	486	509	657	647	525	645	609	567	600	556	578	522	521	588	681	657	775	839	653	554	727	569	767	797	578	583	555	560	640	708	587	675	618	608	653	616	721	733	770	734	570	634	832
EPB41L2_2175	92	110	133	147	123	152	84	70	118	121	79	86	97	105	76	82	116	77	100	105	160	148	213	238	133	126	130	133	134	159	64	92	144	145	125	178	190	129	160	130	108	85	90	95	88	100	89	99	127
EPHA3_2188	73	78	182	241	150	157	83	117	130	150	134	143	109	88	118	115	92	86	108	94	29	29	54	53	34	52	174	142	77	103	42	52	37	27	73	60	98	112	105	94	107	117	106	91	87	83	37	43	140
EPHB2_2194	489	476	592	637	522	672	360	319	434	504	413	392	415	419	471	435	459	441	583	596	807	717	712	747	538	460	411	373	785	850	417	417	616	728	471	529	489	484	520	467	477	421	311	306	503	471	440	487	702
EPN2_2197	0	0	0	2	0	0	0	1	1	2	3	0	1	1	0	2	0	0	2	2	0	0	0	0	1	0	0	0	0	1	0	2	0	0	0	0	0	1	0	4	1	1	0	2	0	1	0	0	0
EPRS1_2200	3	6	5	11	5	9	5	4	2	2	0	2	7	4	0	1	6	6	9	6	3	0	8	5	3	1	9	8	6	13	4	2	6	6	2	2	8	3	5	3	4	3	5	8	2	5	3	3	4
ERBB3_2206	0	1	1	0	3	1	0	0	1	0	0	0	0	0	0	1	2	0	1	0	1	1	0	0	0	2	1	0	1	0	0	0	1	0	1	0	1	0	1	0	0	1	3	1	1	0	2	0	0
ERO1A_2227	220	182	334	246	344	336	193	144	237	257	199	249	218	233	258	231	209	231	188	242	399	366	470	419	282	322	299	177	357	344	216	206	296	376	442	606	610	516	578	564	244	216	259	335	257	235	268	304	339
ERO1B_2228	2	3	4	4	5	4	7	5	6	10	5	8	4	5	8	12	5	5	1	2	1	3	4	8	7	4	5	1	4	6	2	7	3	2	2	6	1	9	7	10	2	2	0	3	9	16	11	10	12
ESR1_2235	0	0	2	0	0	0	0	0	0	0	0	0	0	0	0	0	0	0	0	0	0	0	0	0	0	0	0	0	0	0	0	0	0	0	0	0	0	0	0	0	0	0	1	0	0	0	0	0	0
ESR2_2237	0	2	2	2	0	0	0	0	0	1	0	0	0	1	0	0	0	0	0	0	0	1	0	0	0	0	0	0	0	0	0	0	0	0	0	2	0	0	0	1	0	1	1	0	0	0	0	0	0
ETFA_2244	1005	989	1188	1391	1304	1294	881	823	1110	1197	957	1021	845	771	826	814	1075	924	1061	911	1099	908	1141	1201	860	853	1215	1101	1085	1255	836	826	748	887	1188	1236	1100	1019	917	859	1124	1055	1023	911	962	867	846	817	1371
ETFB_2245	53	39	66	105	59	73	49	45	53	67	76	53	75	54	61	56	34	72	74	58	39	27	22	38	27	30	35	45	62	75	55	39	55	33	19	26	14	21	16	18	77	67	64	40	54	51	35	28	67
ETS1_2248	325	303	257	274	296	272	104	110	219	280	189	207	216	193	158	153	216	265	300	253	1484	1509	1539	1652	845	887	2380	1987	867	1031	1666	1759	1574	1772	1879	2071	1962	1804	1083	1048	1758	1748	1447	1070	1542	1495	1633	1813	530
ETV1_2251	0	0	2	5	5	2	0	0	0	1	2	4	0	1	4	0	1	4	1	2	0	0	1	2	0	0	0	0	3	2	0	0	0	1	1	0	1	0	0	2	0	0	2	1	0	1	1	1	5
EVL_2255	868	883	1150	1269	981	958	684	680	1043	1146	765	871	833	856	766	802	910	771	799	925	797	726	740	768	604	537	970	762	1030	969	640	715	683	753	411	484	354	330	337	315	997	897	460	433	768	728	415	510	1123
EXOSC4_2269	23	26	37	33	32	38	13	12	18	16	40	28	32	12	22	33	19	30	38	35	36	28	26	33	27	14	11	16	46	58	23	24	28	19	18	23	17	14	18	23	23	21	36	40	17	14	10	13	62
EXT1_2278	498	426	578	618	564	581	351	327	493	613	429	449	435	375	445	425	424	351	361	454	765	892	784	862	526	521	636	505	405	434	615	543	778	785	772	917	729	758	775	689	572	575	304	273	605	506	580	623	629
EXTL1_2279	0	2	2	2	0	3	4	2	2	0	0	0	1	1	1	4	3	0	0	3	1	0	4	0	1	0	0	0	2	0	2	0	0	2	0	0	0	1	0	2	0	2	0	0	1	0	2	0	1
EZH2_2282	185	119	178	178	235	220	136	135	151	171	132	155	117	164	140	112	171	145	125	170	287	246	326	351	209	193	139	93	252	193	85	85	175	172	157	198	213	177	204	196	169	145	173	192	152	127	113	139	257
F2_2286	0	1	0	0	0	0	1	1	0	0	0	0	0	1	0	0	0	2	0	1	0	1	1	1	0	2	0	0	2	0	0	0	0	1	0	0	0	0	0	0	0	0	0	1	0	0	0	0	0
F3_2289	44	40	104	112	123	128	57	73	83	95	66	68	68	54	69	71	53	40	42	47	35	44	55	57	32	51	189	144	33	28	86	86	43	41	70	88	114	83	82	96	200	173	127	127	80	71	49	88	81
F9_2297	0	0	0	0	0	0	0	0	0	0	0	0	0	0	0	0	0	0	0	0	0	0	0	0	0	0	0	2	0	0	0	0	0	0	0	0	0	0	0	2	0	0	0	0	0	0	0	0	0
FABP1_2298	0	0	1	0	0	1	2	0	0	0	0	0	0	0	0	0	0	0	0	0	0	0	0	0	0	0	0	0	3	0	0	0	0	0	0	0	0	0	1	0	0	0	1	0	0	0	0	1	2
FAH_2303	28	31	31	40	41	33	27	31	45	49	36	58	32	19	19	17	26	33	38	42	20	19	36	49	36	34	27	19	42	49	26	35	33	19	29	27	26	24	35	20	43	31	39	44	20	20	15	11	45
FAIM_2304	8	8	15	8	26	9	15	4	15	17	11	18	15	19	14	14	12	15	14	19	10	9	19	9	8	15	16	28	15	15	9	12	10	7	5	9	9	10	9	18	18	12	12	15	12	10	10	6	8
FAM13A_2311	2	0	5	0	0	1	1	0	1	1	0	1	1	0	2	0	2	0	0	0	1	0	1	4	3	1	0	0	1	1	2	0	2	2	1	7	0	1	1	3	0	1	1	0	2	0	0	2	1
FAM174A_2316	245	223	293	435	250	293	227	232	343	432	204	230	230	208	248	236	236	209	188	199	133	173	184	235	180	133	328	376	223	223	168	154	119	162	105	156	128	155	145	142	276	296	286	237	156	121	81	136	339
FAM20B_2318	63	51	59	77	86	72	57	48	59	67	61	58	43	68	62	57	58	46	45	67	77	91	77	74	50	63	83	48	87	78	51	58	77	109	26	51	38	39	32	32	56	57	74	76	70	50	31	61	73
TLCD3A_2328	123	156	159	149	118	121	58	97	142	206	92	107	135	111	131	120	130	117	115	122	171	188	183	224	108	109	157	163	160	175	128	137	127	167	104	105	131	169	106	107	171	152	143	137	140	110	83	84	198
MINDY1_2329	7	3	7	9	4	15	5	6	6	10	9	12	4	3	2	5	11	3	5	4	2	3	3	2	2	7	2	2	11	6	1	5	5	3	1	1	2	1	3	0	6	1	0	8	1	4	2	0	10
DIPK1A_2333	645	609	887	934	663	723	477	511	1028	1074	513	551	625	533	480	474	664	540	471	535	261	274	483	521	353	330	852	724	561	637	316	306	186	215	430	466	462	524	499	421	799	727	266	242	378	330	260	238	802
FANCI_2338	32	38	54	104	65	79	26	40	28	35	31	30	46	25	33	31	51	40	90	42	133	97	150	159	102	81	26	41	49	109	21	30	58	58	46	67	89	62	77	80	39	31	49	26	28	27	26	29	59
FAS_2345	280	258	533	554	494	485	394	332	542	650	517	477	493	494	389	365	357	341	310	315	1152	1156	894	949	710	660	1317	889	489	507	956	879	975	1031	2008	2402	1169	1076	1088	920	887	757	563	554	901	839	1152	1169	416
FASLG_2346	0	0	0	0	0	0	0	0	0	0	0	0	0	0	0	0	0	0	0	0	0	0	0	0	0	0	0	0	1	0	0	0	0	0	0	0	1	0	0	0	0	1	0	0	0	0	0	1	0
FASTKD5_2353	127	152	214	247	210	254	108	119	185	252	119	158	125	148	129	145	156	152	73	170	207	195	199	236	134	132	264	215	182	123	131	149	148	217	237	216	182	197	140	152	205	248	94	119	203	148	185	169	195
FAT1_2356	227	210	278	384	301	240	191	211	249	282	309	257	357	242	233	192	218	244	526	285	303	242	249	254	178	173	534	628	311	545	433	549	361	393	129	173	159	87	102	123	496	484	357	233	449	470	201	230	311
FBL_2360	124	141	149	158	177	199	79	79	115	124	96	101	94	97	109	103	129	111	98	112	152	170	150	184	111	109	89	84	154	157	67	73	99	157	105	104	145	136	116	116	106	115	105	112	107	90	80	102	178
FBN1_2363	10	12	20	18	13	9	16	9	20	15	14	15	11	16	10	15	13	14	15	14	14	22	27	19	15	8	29	12	21	16	10	13	8	17	14	22	18	15	10	10	16	15	11	5	17	15	14	21	24
FBXL12_2366	143	135	188	187	175	184	118	109	196	235	117	134	103	100	134	118	139	106	102	118	182	151	206	240	137	160	184	120	171	208	153	119	112	120	135	170	149	200	162	146	173	151	138	148	170	125	101	133	197
FBXO11_2372	300	205	382	317	314	266	208	149	273	352	284	342	255	261	245	231	270	231	206	284	258	248	274	270	247	239	481	277	371	354	226	268	281	279	169	270	187	200	204	201	335	257	327	368	306	233	187	193	295
FBXO21_2375	5	2	8	8	13	12	5	6	4	11	7	12	5	17	8	6	2	15	11	7	11	3	7	7	9	9	10	7	9	11	10	6	9	12	1	3	3	5	5	3	3	9	3	13	2	6	4	2	5
FBXO7_2377	1355	1384	3647	4173	3131	3321	2292	2290	1820	2000	1663	1732	1850	1626	2551	2450	1327	1143	1238	1297	2541	2612	2603	2861	1712	1671	1661	1262	1433	1533	1480	1285	1906	2044	3673	4041	2795	3184	2608	2481	1734	1745	1636	1470	1989	1825	2508	2798	1782
FCGR3B_2380	1	0	0	1	0	0	1	0	0	0	0	0	0	0	1	0	0	0	0	0	0	0	0	0	0	0	0	0	0	0	0	0	0	0	0	0	0	0	0	0	0	0	0	0	0	0	0	0	0
FDFT1_2382	214	176	279	242	266	274	158	137	154	159	186	225	119	114	126	126	159	175	101	171	182	176	223	229	164	140	150	120	210	182	106	99	133	141	144	152	216	177	196	171	122	112	68	91	109	91	74	85	286
FEN1_2387	75	56	103	87	116	103	27	56	39	42	50	57	25	36	50	40	54	58	76	82	182	164	185	201	116	119	49	32	109	137	45	46	101	110	48	64	106	57	106	99	42	50	31	26	34	44	61	65	93
FEZ2_2394	1627	1566	2243	2356	2056	1858	1321	1305	1921	2127	1574	1813	1882	1578	1541	1525	1582	1534	1841	1680	1606	1609	1615	1633	1130	1163	2221	1909	1625	1879	1516	1454	1516	1642	1370	1525	1360	1273	1245	1139	1957	1762	1796	1603	1733	1519	1310	1339	2354
FGB_2397	1	0	0	0	1	0	1	0	3	0	0	0	0	0	0	0	0	0	0	0	0	1	2	0	2	0	0	0	0	0	0	0	0	0	2	1	0	1	1	0	0	0	0	0	0	0	0	2	0
FGF17_2402	0	0	0	1	0	0	1	0	0	0	1	0	0	0	1	0	0	0	0	0	0	0	0	0	0	0	0	2	0	0	0	1	0	0	0	0	0	0	0	0	0	0	0	0	0	0	2	0	0
FGF2_2405	1105	974	1540	1675	2361	2340	866	875	1004	1220	934	1127	1494	1344	1419	1474	875	761	843	842	1947	2205	2172	2266	1360	1277	2093	1793	1046	1116	2183	2064	2025	2212	1457	1828	1652	1720	1352	1290	1676	1580	2838	2608	2316	2013	1908	2080	1547
FGF7_2409	87	85	118	154	118	109	94	83	98	147	92	91	87	75	87	75	110	98	82	99	45	28	44	69	81	61	83	100	67	72	37	53	32	48	28	38	54	56	44	55	108	72	110	104	38	41	28	39	112
FGFR2_2417	79	59	60	70	60	44	34	49	62	61	83	76	61	61	40	46	64	64	127	76	24	20	33	31	20	45	154	138	39	49	114	110	33	25	26	28	8	14	22	20	71	64	41	13	55	49	24	18	98
FHL2_2423	28	57	28	17	17	34	13	9	53	39	25	8	15	11	13	11	31	29	11	21	26	37	29	28	22	18	109	65	40	30	53	51	25	20	7	19	23	36	12	14	53	51	37	39	49	48	18	16	53
FKBP14_2430	159	153	147	178	112	158	109	117	121	204	104	121	87	98	138	110	180	151	136	158	115	142	133	155	120	121	151	132	181	160	95	114	114	154	74	115	79	89	79	82	131	112	127	119	79	90	108	101	214
C3orf85_2441	0	0	0	0	2	1	0	0	0	0	0	0	0	0	1	0	0	0	0	0	0	0	0	0	1	0	0	0	0	0	0	0	0	1	0	2	0	0	0	1	0	0	0	0	0	0	0	0	0
FMO5_2453	0	0	0	2	0	2	3	0	0	0	0	0	0	3	3	0	2	1	0	0	0	1	3	2	2	0	0	1	1	0	3	0	1	1	0	0	3	5	4	2	0	0	0	1	1	0	1	1	0
FN1_2459	312	294	529	575	470	474	261	283	364	406	233	218	358	278	302	331	278	292	376	321	685	699	744	752	625	594	458	429	808	901	342	418	493	528	2770	3090	2425	1927	1892	1774	734	747	403	332	963	971	1358	1559	435
FOLH1_2460	0	0	0	0	0	0	1	0	1	0	0	0	0	0	0	0	0	0	0	0	0	0	0	0	0	3	0	0	0	0	0	0	0	0	0	0	0	1	0	0	0	0	0	1	0	0	0	0	0
FOS_2461	6	5	9	8	19	12	6	6	28	43	14	10	11	11	8	13	12	9	5	9	2	8	3	1	5	0	8	3	10	8	2	5	4	5	2	0	0	2	7	2	5	10	2	2	13	2	0	1	4
FOSL1_2463	110	85	109	124	194	142	40	59	181	200	68	111	97	87	91	95	93	66	76	101	559	511	479	484	231	217	792	581	172	186	340	323	598	705	460	474	739	589	467	364	629	515	458	490	398	286	416	450	157
FOXG1_2475	1	0	0	4	0	0	0	0	0	0	0	0	0	0	0	0	1	1	0	0	2	1	0	1	0	0	0	0	0	0	0	0	0	4	0	1	0	0	0	0	0	2	2	0	0	0	0	0	0
FOXJ3_2478	18	17	23	34	44	41	20	16	24	32	43	34	45	38	21	25	13	22	41	30	19	28	16	44	24	20	34	34	30	66	17	15	20	17	7	18	43	12	22	17	29	29	41	29	21	46	9	8	36
FOXM1_2479	3	6	14	5	6	12	5	3	4	0	2	5	1	6	1	4	3	8	1	5	0	4	10	16	12	3	2	1	7	8	3	3	1	7	2	3	10	8	8	7	5	1	2	3	3	3	1	6	2
FOXO3_2481	195	162	288	294	183	238	146	151	198	229	191	184	176	162	182	121	158	170	203	215	189	244	209	269	179	142	249	210	232	307	154	139	172	180	105	127	157	130	164	143	197	170	321	223	129	144	69	76	264
FOXO4_2484	18	11	22	37	23	25	15	24	26	36	18	18	30	19	5	8	17	18	17	22	15	3	15	12	9	17	18	5	20	21	10	16	7	9	2	3	9	5	6	6	37	23	11	11	13	21	10	3	24
FPGS_2489	143	118	163	146	127	169	86	108	151	156	111	108	124	81	138	122	136	117	112	137	137	141	162	198	129	114	87	85	173	133	93	92	123	126	165	143	168	158	155	141	96	97	133	143	104	92	87	98	176
FRS2_2492	1011	1050	1181	1313	1097	1123	694	759	1419	1550	866	939	920	771	896	779	944	860	822	847	1018	1004	1044	1085	768	756	1721	1498	819	932	1153	1056	834	878	847	939	807	906	800	624	1460	1391	704	610	975	913	657	726	1408
FSD1_2495	33	26	33	38	32	44	21	29	26	48	30	39	28	17	33	21	33	23	41	36	28	36	25	52	49	35	26	27	51	69	34	35	34	22	29	49	46	56	44	45	27	14	47	35	23	33	30	28	43
FUT1_2519	0	0	0	0	0	0	2	0	0	0	0	0	0	0	0	0	1	2	0	0	0	0	0	0	0	0	0	0	0	0	0	0	0	0	2	0	0	0	0	0	1	1	12	15	0	0	0	0	1
FYN_2527	1775	1384	4116	4153	2939	3139	2415	2521	3481	3555	2425	2675	2021	1845	1948	1949	2109	1712	1911	1887	2338	2215	1863	1859	1476	1335	3035	2505	1993	2014	1817	1693	1713	1759	1319	1356	1218	1239	1444	1313	2780	2513	2847	2506	1498	1375	792	872	2208
FZD1_2533	15	11	28	5	12	10	8	2	18	16	9	15	17	15	16	7	15	16	7	29	6	8	9	13	7	3	0	2	12	11	5	6	3	12	18	15	9	12	8	8	9	9	16	23	11	15	6	10	18
G0S2_2539	7	10	10	8	5	10	9	4	6	2	5	8	2	3	0	3	12	10	13	22	0	1	1	2	2	1	5	6	8	4	0	4	0	1	1	3	0	1	1	1	3	7	8	7	4	5	1	0	19
G3BP2_2545	330	261	517	418	476	446	276	256	364	421	327	358	281	325	335	291	335	349	198	405	536	502	468	481	355	366	380	263	504	366	522	451	456	581	433	471	386	396	349	379	547	519	300	451	655	505	454	442	422
G6PC_2546	0	0	0	1	0	0	0	0	0	0	0	2	0	0	0	0	0	0	0	0	0	0	0	0	0	0	0	0	0	0	2	0	0	0	1	3	0	0	1	0	0	0	0	0	0	0	0	0	0
G6PD_2548	72	62	136	110	125	124	73	68	89	86	107	113	60	91	95	88	96	110	80	84	96	67	61	108	70	66	79	61	129	120	85	61	95	108	49	71	56	43	73	61	85	87	106	143	94	54	80	63	147
GAA_2549	7	5	14	13	10	9	18	8	16	22	19	12	19	9	16	8	9	9	25	5	12	4	4	4	8	11	11	8	9	18	13	10	11	7	7	12	8	5	10	6	11	7	16	7	24	22	7	14	8
GABARAPL1_2552	11	21	41	49	13	27	3	11	34	21	22	31	40	17	10	10	13	20	18	25	11	6	22	13	12	10	27	31	27	27	27	28	13	20	7	9	6	6	20	12	24	29	28	29	24	36	12	6	15
GABBR1_2553	155	176	246	255	190	178	184	163	268	252	220	198	206	181	180	176	183	125	198	182	163	175	171	161	150	144	245	230	195	184	209	177	151	158	283	299	187	185	147	157	210	209	155	135	262	237	195	233	246
GABPB1_2555	588	536	537	666	570	621	337	317	529	617	403	406	510	466	450	474	457	387	407	445	629	727	682	755	434	379	828	735	577	608	721	694	598	686	675	764	553	639	445	418	920	832	717	577	835	753	548	541	763
GABRB3_2561	1	3	1	7	3	2	3	2	2	0	1	2	0	4	4	5	1	4	5	3	2	4	2	2	4	0	8	4	5	3	3	2	4	8	2	3	1	2	0	1	0	4	2	1	6	1	0	3	2
GAD1_2566	9	2	10	2	11	6	4	7	4	5	7	9	9	2	10	9	5	5	9	12	7	6	7	6	7	3	6	2	13	14	5	2	4	5	2	2	3	3	3	2	3	0	10	4	3	5	1	4	8
GAD2_2567	0	0	0	0	0	1	0	0	1	1	0	0	0	0	0	0	1	0	0	0	0	0	2	1	0	0	0	0	0	0	0	0	0	0	1	1	0	0	0	0	0	0	0	0	0	0	0	0	0
GADD45A_2569	120	102	103	106	136	128	77	59	128	181	110	123	101	98	78	70	119	120	139	144	147	144	197	238	122	107	226	168	184	190	173	189	190	180	41	47	79	72	43	43	257	189	829	786	116	99	55	52	153
GADD45B_2570	121	161	140	166	180	198	65	61	252	335	77	102	235	170	114	81	126	120	84	87	145	167	159	245	79	84	376	278	79	105	205	221	130	157	405	434	223	239	122	130	718	667	65	66	516	529	311	342	249
GADD45G_2571	0	1	10	6	3	10	3	2	6	3	6	6	10	12	8	8	2	4	3	1	0	0	0	2	3	5	1	4	3	0	3	0	0	0	15	10	9	8	25	25	9	3	3	1	3	1	0	2	3
GAGE1_2574	0	1	2	2	0	0	0	1	0	1	3	0	1	0	0	0	1	0	1	1	0	2	0	0	0	0	0	2	2	0	1	1	2	1	4	3	1	3	2	3	0	4	0	5	3	2	1	2	4
GAGE12F_2576	0	0	0	1	4	0	0	2	0	0	1	0	0	0	0	0	0	0	0	0	0	0	0	1	0	0	0	0	0	0	2	0	0	0	0	0	0	0	0	1	0	0	0	0	1	0	0	0	0
GAGE12J_2577	0	0	0	0	0	0	0	0	0	0	0	0	0	0	0	0	0	0	0	0	0	3	0	0	0	0	0	0	0	0	0	0	0	0	0	1	0	0	1	0	0	0	0	0	0	0	0	1	0
GAGE1_2578	0	0	0	0	0	0	1	0	0	0	0	0	0	0	0	0	0	0	0	0	0	0	0	0	1	0	0	1	0	0	0	0	0	0	0	0	1	0	0	0	0	0	0	1	0	0	0	0	0
GAP43_2585	2718	2833	3509	3987	2890	2945	1735	1812	4246	3967	2434	2666	2979	2539	2793	2736	2968	2414	2966	3113	2250	1942	1906	2059	1213	1138	3466	2862	3064	3300	2291	2209	1807	2052	2716	2639	1788	1867	978	1000	3718	3780	1482	1306	2996	2696	1969	2142	3341
GATA2_2599	0	0	0	0	0	0	0	0	1	1	1	0	0	1	0	0	0	0	0	0	0	0	0	0	1	0	0	0	0	0	1	0	0	0	0	3	0	0	1	0	0	2	0	0	0	0	0	1	0
GATA3_2600	0	0	0	0	0	0	0	0	0	0	3	0	2	0	0	0	0	0	0	0	0	0	0	0	0	0	1	0	0	0	0	0	0	0	0	0	1	0	0	0	0	0	0	0	0	0	0	0	0
GCLM_2615	594	481	1048	1218	1032	967	596	560	1425	1603	790	878	1390	1173	856	812	516	548	633	666	1529	1572	1379	1555	1065	1140	1245	1043	990	1169	1082	1067	1268	1351	2969	3222	2211	2059	1733	1567	1896	1971	2636	2459	2514	2336	2145	2298	888
GDF15_2621	31	34	23	14	58	49	31	26	30	41	28	33	40	24	23	28	35	27	31	31	24	24	43	39	59	60	25	8	68	72	17	13	18	20	7	11	24	29	38	21	7	19	1094	1016	9	15	10	7	36
GDF7_2622	0	0	0	0	0	0	0	0	0	0	0	0	0	0	0	0	0	0	0	0	0	0	0	0	0	0	0	2	0	0	0	1	0	0	0	0	0	0	0	0	0	0	0	2	0	0	0	0	0
GDPD5_2628	11	14	10	27	19	8	6	5	14	11	11	6	23	13	17	13	12	16	13	12	3	4	4	3	5	0	2	4	8	4	8	6	9	8	7	10	4	2	3	5	15	17	2	4	13	11	7	7	18
GFAP_2632	6	3	19	15	12	12	7	10	12	23	11	9	8	9	8	11	11	1	11	5	0	1	0	0	0	2	11	5	0	3	7	7	5	0	1	0	0	0	1	0	8	7	3	0	10	7	3	0	8
GFOD1_2633	9	11	15	19	9	3	9	10	7	16	14	9	5	7	6	7	20	12	21	11	8	6	15	22	16	3	15	10	22	23	9	8	5	14	8	7	8	8	6	5	4	8	10	10	6	7	2	4	21
GFOD1_2634	29	21	19	26	21	17	15	21	34	21	21	28	25	7	9	14	15	12	18	24	28	31	26	25	9	25	9	21	29	22	8	10	10	12	8	7	10	14	19	12	13	15	37	21	16	9	8	11	34
GGCX_2638	141	129	339	385	324	321	195	185	206	237	215	193	208	196	210	173	184	134	203	212	236	218	192	214	186	153	245	176	204	229	202	161	205	205	258	295	260	224	226	182	216	199	154	155	230	222	244	244	195
GGH_2639	370	329	464	509	465	543	338	330	265	365	347	342	339	282	321	307	401	335	397	398	625	669	883	845	729	682	439	406	496	538	372	399	501	519	370	475	547	528	606	513	424	380	336	339	389	303	363	357	495
GHR_2644	0	0	1	2	0	0	3	1	1	1	2	3	0	1	0	0	1	0	1	3	0	0	0	1	0	0	3	0	0	0	6	0	1	0	0	2	0	0	1	0	3	2	0	0	2	0	2	1	1
GJA1_2649	502	412	484	499	579	602	294	239	389	463	471	415	423	366	347	280	383	446	560	483	401	328	384	394	254	222	694	569	300	360	489	544	519	673	145	225	142	120	106	103	455	440	261	239	490	407	277	312	630
GJB1_2650	0	1	0	0	0	0	0	0	0	0	0	0	0	0	0	0	0	0	0	1	0	0	0	0	0	0	0	0	1	0	0	0	0	0	0	0	0	0	0	0	0	0	1	3	0	0	0	0	0
GJB2_2653	2	0	3	4	0	0	1	2	5	2	3	2	3	1	3	0	3	2	7	4	6	0	3	3	0	2	4	3	11	24	6	2	2	2	3	5	10	2	5	3	2	1	11	12	0	0	1	0	3
TMPPE_2661	23	27	15	33	30	24	14	23	39	38	25	32	25	28	20	25	24	24	28	19	21	23	32	34	16	16	16	19	37	47	27	24	21	24	19	19	21	25	36	21	23	40	42	26	25	23	18	16	43
GLI1_2663	3	4	0	0	2	3	2	4	2	0	1	2	3	0	4	2	0	1	4	1	6	0	1	2	3	2	6	8	2	4	1	6	3	1	0	0	0	3	7	2	5	0	6	8	4	7	1	1	3
GLI2_2664	7	3	3	4	4	5	7	13	1	6	7	4	9	4	1	9	9	2	8	5	1	2	1	2	1	3	2	0	4	12	4	5	3	5	7	4	7	3	5	1	0	5	5	3	8	12	4	2	5
GLOD4_2670	4	5	7	5	6	7	4	3	3	1	7	9	2	9	0	2	7	6	11	7	7	4	6	5	7	5	7	4	15	11	3	8	5	5	3	1	3	1	1	1	6	4	4	9	8	6	6	4	8
GLRX_2674	589	581	2988	3198	2761	2704	1831	2032	1147	1248	1175	1476	1310	1240	2071	2032	637	570	552	596	1443	1393	1550	1657	943	882	721	636	515	562	1022	942	1234	1333	933	998	888	1060	942	909	939	945	646	633	882	781	785	815	785
GLUD1_2678	7	4	11	7	7	18	3	2	2	9	4	5	2	4	5	2	4	7	7	8	5	12	1	12	3	3	6	1	11	9	4	7	7	6	4	11	3	4	4	3	12	7	10	10	10	2	3	6	1
GLUL_2679	0	1	0	0	0	1	0	1	0	0	0	1	1	0	0	1	0	0	0	0	0	0	0	0	0	0	0	1	0	0	0	0	0	0	0	0	0	2	0	0	0	0	0	0	0	0	0	0	0
GMNN_2688	521	471	512	555	744	705	310	242	248	301	303	321	260	250	356	397	453	409	391	476	1107	1097	1100	1122	644	606	283	260	605	583	191	238	713	826	418	478	614	577	581	571	314	227	202	213	223	178	294	333	660
GNA11_2692	3	4	2	5	4	0	0	0	5	3	3	0	2	4	1	2	0	4	3	4	5	0	1	3	1	6	3	0	4	6	8	1	7	3	2	8	2	4	3	3	1	1	4	4	6	1	2	2	2
GNA15_2693	0	0	0	0	0	0	0	0	0	1	0	6	0	1	0	0	1	0	2	0	0	0	0	0	0	0	0	0	0	0	0	0	0	0	0	0	1	0	0	0	0	0	1	0	0	0	0	0	1
GNAI1_2696	21	13	29	33	34	24	16	12	19	44	21	19	16	9	8	13	15	12	18	37	17	15	15	25	17	15	22	26	14	27	13	8	13	16	22	12	10	17	20	21	29	19	14	13	26	16	19	16	18
GNAL_2698	0	0	0	0	0	1	0	0	0	0	0	0	0	1	0	0	0	0	0	0	0	0	1	0	0	0	0	0	0	0	0	0	0	0	0	0	0	0	2	0	0	0	0	1	0	1	0	0	0
GNAS_2704	1993	1738	2831	2870	2547	2494	1793	1706	2380	2513	2152	2137	2087	2015	1919	1757	2032	1909	2074	2103	2051	1814	1883	1962	1478	1332	2621	1959	2502	2698	1690	1642	1723	1868	1700	1828	1507	1346	1525	1386	2334	2169	1383	1384	2014	1818	1589	1572	2645
GNB1_2706	1391	1471	1755	1823	1956	1816	1223	1119	1377	1662	1437	1458	1382	1273	1495	1360	1337	1409	1355	1696	1754	1688	1721	1863	1291	1180	1669	1284	1651	1614	1444	1425	1677	1821	1647	1870	1482	1316	1302	1212	1688	1677	1375	1431	1735	1583	1422	1651	2150
GNB5_2709	54	50	73	68	88	82	36	47	63	67	71	51	55	54	50	40	77	58	74	74	79	87	101	76	74	64	77	56	84	78	54	46	51	81	60	71	59	58	53	47	56	59	53	70	60	68	55	65	62
GNMT_2719	34	27	69	71	58	39	35	39	63	63	38	45	56	35	36	31	52	43	27	38	41	54	46	74	38	52	43	33	57	34	36	23	39	45	34	48	38	45	43	44	30	21	26	28	25	32	33	36	42
GNPDA1_2723	0	1	8	5	1	2	0	0	0	0	0	1	0	0	1	2	3	2	1	6	0	0	1	0	1	3	3	0	1	0	0	1	0	1	0	3	0	0	2	1	4	0	2	0	0	0	0	2	0
GNS_2725	286	269	490	546	367	366	301	290	449	520	375	400	426	357	311	339	291	277	414	379	377	328	332	354	267	246	516	430	357	418	339	320	279	314	276	387	348	354	307	292	445	428	320	267	404	356	254	280	390
GOLT1B_2734	41	44	44	56	59	67	35	43	28	55	43	38	51	42	29	43	41	45	25	46	90	89	85	79	44	62	68	41	50	57	60	56	73	88	95	82	69	63	65	59	63	54	62	65	66	58	92	102	47
GOT1_2737	88	70	75	100	84	106	44	68	53	64	64	77	80	58	45	64	68	78	104	82	46	23	57	54	39	43	75	39	75	92	53	50	29	43	23	27	39	38	34	38	54	61	382	244	43	39	29	29	80
GPATCH8_2740	100	83	137	169	142	137	108	113	136	212	134	128	88	105	82	131	108	85	91	106	84	74	144	186	106	89	103	77	116	165	87	76	107	89	75	64	85	88	90	102	114	124	118	146	69	116	56	60	164
GPC1_2744	251	218	258	299	219	234	156	146	294	319	129	150	176	171	196	183	264	202	161	211	183	185	184	214	138	131	148	144	295	225	162	129	147	162	127	143	119	134	61	80	269	195	135	110	181	188	99	73	331
GPER1_2750	0	2	1	1	2	4	3	1	3	7	2	1	4	3	4	1	3	2	8	2	0	4	2	2	4	6	2	0	9	4	2	0	0	0	0	0	0	0	2	0	1	4	0	2	0	0	0	0	0
GPI_2753	348	303	489	392	441	429	285	234	341	373	377	341	359	319	271	282	343	341	373	406	273	239	347	329	306	242	457	331	376	371	271	290	260	305	168	271	329	261	327	322	349	276	251	270	322	288	209	243	530
ADGRG1_2761	70	60	70	88	70	72	50	50	103	121	136	104	106	86	44	58	67	84	144	102	44	56	36	38	31	23	85	89	64	67	86	93	59	78	20	30	18	5	14	10	99	97	42	34	96	69	29	35	83
GPX1_2765	5	5	3	2	8	5	1	1	3	3	5	8	3	4	2	5	6	5	8	8	9	5	7	8	8	5	8	6	3	4	3	5	6	4	6	5	7	3	6	5	4	7	5	6	7	4	2	1	13
GPX2_2766	1	1	1	0	0	0	0	0	0	0	0	0	0	0	0	1	0	0	2	0	0	0	0	1	0	2	0	0	0	0	0	0	0	0	2	0	0	0	0	0	0	1	0	0	0	0	0	1	1
GPX4_2768	352	332	386	400	357	374	251	213	408	447	329	330	333	279	288	266	398	322	344	396	563	519	623	670	538	532	448	307	593	579	424	483	497	536	312	433	288	323	302	266	431	424	550	544	472	367	279	354	484
GRB10_2771	149	133	178	193	193	206	145	168	138	162	182	199	219	144	102	174	168	139	238	168	120	121	205	208	129	144	132	168	260	357	183	237	130	155	76	83	157	127	154	126	160	159	423	340	207	196	73	81	212
GREB1_2776	2	1	1	5	0	6	1	1	4	3	1	2	3	4	6	0	7	2	4	2	0	0	0	1	0	1	2	2	0	5	2	2	1	1	0	4	2	5	0	1	2	1	2	2	1	1	2	0	5
GREB1_2777	0	0	0	0	0	0	0	0	0	0	0	0	1	0	0	0	0	0	0	0	0	0	0	0	0	0	0	0	0	0	0	0	1	0	0	0	0	0	0	0	0	0	0	0	0	0	0	0	0
GREB1_2778	6	8	6	13	5	15	1	3	17	8	7	8	4	7	2	6	9	5	6	3	7	6	8	13	3	4	3	11	10	12	5	10	1	2	4	3	5	8	4	4	9	6	5	6	9	5	4	1	10
GRIN1_2787	0	0	0	2	0	1	0	1	1	0	0	1	0	1	0	0	1	0	2	0	1	0	0	1	1	0	1	2	0	0	0	0	0	0	0	0	2	1	2	0	0	0	3	1	0	0	0	1	0
GRIN2B_2791	0	1	0	0	0	0	0	0	0	0	0	0	0	1	0	0	0	1	0	0	0	0	1	0	0	0	1	0	0	0	1	0	0	2	3	0	0	0	1	0	0	0	0	1	0	0	1	0	0
GRIN2C_2792	0	0	0	0	0	1	0	0	0	0	4	2	1	0	0	0	0	0	0	0	0	0	0	0	0	0	0	0	0	2	0	0	0	0	0	2	0	0	0	0	1	0	0	1	0	0	0	0	0
GRM4_2797	0	0	0	0	1	0	1	0	0	0	0	0	0	1	0	0	0	0	0	0	0	0	0	0	0	0	0	0	0	0	0	0	0	0	0	0	1	1	0	0	0	0	1	0	0	1	0	0	3
GRN_2799	13	5	18	12	14	16	19	11	15	26	26	29	22	24	21	17	12	18	28	25	31	19	18	17	22	24	10	3	24	24	24	18	21	21	16	10	16	21	17	17	23	26	28	18	21	26	16	28	21
GRWD1_2804	2	5	1	7	6	8	1	1	5	8	4	5	8	5	1	3	3	4	7	5	0	5	7	13	3	7	0	2	13	11	5	4	12	10	3	5	5	6	0	0	1	5	3	2	8	1	2	0	3
GSK3A_2809	226	221	215	218	244	229	118	143	224	306	169	160	200	123	148	173	227	152	183	182	173	226	238	279	158	131	242	176	216	267	148	161	119	184	140	171	172	230	155	130	198	175	196	194	174	138	118	136	297
GSK3B_2810	263	261	496	491	486	440	277	293	330	475	393	385	350	275	312	338	301	303	425	378	272	238	312	327	264	238	485	378	454	528	258	289	259	302	203	267	235	190	256	241	388	356	311	334	345	300	235	265	428
GSTA2_2817	0	0	0	0	0	1	0	0	0	1	0	0	0	0	0	2	2	0	0	0	0	0	0	0	0	0	2	0	0	0	1	0	1	0	1	1	0	1	0	0	0	0	0	0	0	0	0	0	1
GSTA3_2818	0	0	0	0	0	0	0	0	0	0	0	1	0	0	0	0	0	0	0	0	0	0	0	0	0	0	0	0	0	0	0	0	0	0	0	0	0	0	0	0	0	0	0	0	0	0	0	0	0
GSTM2_2823	393	453	644	776	409	484	375	386	841	865	509	545	507	455	469	400	520	367	416	451	257	252	196	250	137	132	694	565	329	340	382	339	223	221	218	198	136	131	101	92	587	573	191	130	306	388	180	202	472
GSTM3_2824	1	0	2	1	5	2	4	2	2	6	2	0	2	2	1	1	3	3	3	3	2	1	1	2	0	2	3	6	1	1	2	4	2	1	0	0	0	0	3	0	1	0	1	2	0	0	0	1	2
GSTP1_2826	103	112	115	156	164	162	120	92	106	144	154	155	142	122	106	125	110	114	229	138	123	102	151	152	117	122	137	105	169	231	117	120	120	154	88	102	121	96	111	110	192	130	108	94	179	129	78	106	152
GSTZ1_2830	22	10	20	16	30	13	16	11	19	25	19	28	25	18	25	10	13	27	13	16	12	12	12	20	10	14	19	14	23	20	11	14	15	12	9	8	14	6	20	9	25	19	16	19	14	17	11	4	12
GTF2E2_2835	54	64	70	151	60	118	77	73	46	68	79	67	125	69	47	60	57	43	137	58	97	111	118	148	75	88	56	76	87	202	78	103	105	126	101	102	158	122	137	147	63	75	200	94	102	95	87	95	67
GTF2H2C_2837	454	426	594	699	578	585	389	409	515	609	406	364	456	353	362	412	448	431	671	445	352	331	478	542	310	346	551	571	475	626	331	414	323	337	272	348	371	305	266	277	522	434	758	506	374	383	253	318	531
GTPBP8_2849	52	43	68	83	65	71	40	38	64	71	67	67	46	59	31	32	57	32	50	60	59	54	80	72	60	43	82	65	59	63	31	28	52	32	31	59	55	44	48	36	50	34	51	69	43	33	23	38	49
GUSB_2851	10	10	17	13	28	15	16	8	11	9	9	22	19	23	9	13	9	15	21	14	10	17	18	19	5	12	17	20	16	16	5	11	14	15	9	5	11	11	6	13	8	20	16	16	9	8	15	7	10
GZMB_2856	0	0	0	0	0	2	0	0	0	0	0	0	0	0	0	0	0	0	0	0	0	0	0	0	0	0	0	0	0	0	0	0	0	0	1	1	0	0	0	0	0	0	3	0	1	0	1	0	0
H2AX_2861	3430	3784	3595	3966	4909	5188	2537	2575	2721	2697	2263	2523	2039	1850	2297	2383	3375	2957	2474	2748	3794	3517	5900	6365	4495	3872	2251	2005	3588	3976	1583	1560	1944	2319	1859	2005	2951	3428	2730	2631	2451	2690	1833	1600	1765	1569	1136	1341	4835
HADH_2872	4	2	11	12	10	3	3	7	3	5	8	9	3	7	5	5	2	6	11	8	8	2	13	10	7	6	20	2	12	8	7	3	7	7	1	0	0	1	4	5	4	8	3	3	6	5	6	4	5
HADHA_2875	117	111	192	189	203	167	145	89	159	188	160	203	130	135	109	125	112	102	131	140	125	122	123	158	105	120	118	59	138	168	108	113	118	123	82	130	122	97	116	103	143	146	108	132	129	132	108	101	157
HAT1_2880	367	291	438	453	519	536	258	246	276	398	408	344	266	283	311	301	321	323	389	399	605	602	628	669	383	392	421	299	496	526	274	290	485	618	410	490	398	368	324	322	374	313	291	322	347	297	308	323	493
HAVCR1_2885	0	0	1	0	0	0	0	0	0	2	0	0	1	0	1	0	0	0	2	1	0	2	0	0	0	0	0	0	0	0	1	0	0	0	0	0	0	2	1	0	1	0	0	0	0	0	1	1	0
HBA1_2887	0	0	1	0	0	1	1	0	0	0	0	0	0	0	0	0	0	0	0	0	1	0	0	0	0	2	0	2	0	1	0	0	0	0	0	2	0	0	0	0	0	0	0	0	0	1	0	0	0
HBB_2888	0	0	1	1	0	0	0	0	0	0	0	0	0	0	1	0	0	1	0	0	0	0	0	0	0	0	0	0	0	1	0	0	0	0	2	0	0	0	0	0	0	0	0	1	0	0	0	0	0
HBD_2891	0	0	2	1	0	0	0	0	0	0	0	0	0	0	0	0	0	0	0	0	0	0	0	0	0	0	0	0	0	0	0	0	0	0	1	1	0	0	0	0	0	0	0	0	0	0	0	0	0
HDAC2_2900	3870	3595	4306	4557	4494	4633	2722	2674	3812	3901	2983	2869	3033	2672	3033	3108	4046	3601	3412	3736	4376	4416	4586	4796	3130	2809	4343	3643	4965	4865	2948	3034	3041	3751	2251	2429	2322	2633	2035	1878	4241	4158	3682	3333	2625	2518	1834	2056	5200
HDGFL3_2909	942	939	1309	1586	1151	1174	699	807	1217	1309	842	987	886	886	786	880	1119	963	898	1019	1271	1255	1213	1337	861	894	1358	1225	1282	1446	862	866	850	1011	721	768	703	741	697	686	1319	1261	1307	1108	851	769	505	600	1428
HEATR1_2915	0	4	7	5	1	4	0	1	2	2	3	1	3	0	1	8	10	5	11	3	6	5	0	5	4	6	2	3	4	12	2	0	3	5	1	4	2	1	2	3	4	3	7	9	3	2	5	4	7
HEBP1_2919	59	51	72	44	56	56	40	36	53	78	60	90	35	50	43	44	45	34	45	68	76	54	83	53	52	54	85	40	79	92	50	41	46	54	30	34	47	35	43	46	50	45	73	78	43	36	24	35	74
HERC6_2923	74	71	504	590	430	487	339	368	214	257	342	353	239	158	249	249	189	163	105	98	1749	1824	2343	2521	1520	1454	49	49	198	187	318	272	858	1009	1449	1547	1500	1679	1289	1203	112	154	569	521	342	341	731	881	132
HERPUD1_2924	305	246	289	262	308	321	212	220	223	294	261	308	276	201	193	206	306	307	316	331	233	196	262	279	219	187	255	186	276	285	201	249	342	375	201	221	363	290	265	264	219	197	829	841	243	245	335	338	379
HES1_2925	116	93	186	204	157	196	118	77	135	191	179	155	164	153	122	90	94	111	135	130	97	100	54	74	53	54	127	85	179	185	58	60	74	95	47	58	30	25	14	17	103	91	145	147	71	80	44	61	147
HEXA_2929	305	284	477	601	415	490	319	359	552	638	319	349	449	346	378	334	362	249	353	358	304	303	345	443	294	247	190	201	329	363	273	256	250	260	295	306	291	357	248	258	452	423	384	304	312	292	193	225	328
HEXB_2932	490	551	799	874	771	853	603	503	679	867	693	764	701	565	587	602	627	659	655	689	709	646	775	816	669	659	889	683	774	776	517	550	548	615	386	462	453	413	485	459	704	701	634	647	556	482	403	438	857
HGF_2939	1	0	5	10	3	7	3	0	1	2	0	1	5	2	0	0	0	0	0	0	6	1	0	3	0	2	0	0	0	0	0	0	0	2	15	25	29	13	20	10	0	0	0	0	2	1	12	7	0
MFSD14A_2943	125	138	255	208	219	185	140	128	211	207	210	210	178	151	149	126	128	142	209	150	242	236	243	228	173	195	212	195	212	248	180	181	210	248	250	279	223	207	257	246	202	181	199	176	245	208	199	231	219
HIF1A_2945	379	408	521	565	484	499	277	303	394	483	274	319	387	332	354	348	376	332	368	363	722	688	642	697	454	430	526	339	522	471	367	400	426	486	1272	1486	1095	1204	789	732	477	478	678	635	522	414	705	760	547
H1-2_2950	1764	1511	1747	1879	2468	2419	1025	963	1346	1537	1703	1763	1285	1247	1085	990	1349	1639	1807	1786	1137	874	2380	2496	1574	1483	1311	1036	3229	3689	701	869	794	1000	347	461	1005	773	981	946	1381	1306	1517	1494	1069	903	455	528	2291
H2AC8_2951	180	148	178	155	208	214	93	60	87	101	134	176	72	87	91	112	128	153	87	186	103	108	277	274	175	190	167	82	300	251	76	66	73	124	34	52	83	91	137	133	117	101	113	149	96	84	44	68	214
H2BC8_2953	43	34	45	41	46	50	25	16	15	29	32	40	24	25	17	21	30	39	42	38	18	31	44	50	57	57	35	32	57	102	21	25	25	30	6	12	20	16	14	25	23	28	24	29	32	16	10	21	39
H2BC9_2954	146	149	164	145	233	200	87	93	86	91	153	154	93	91	96	103	102	142	166	139	130	115	289	279	221	175	132	95	297	350	66	74	86	84	40	44	110	75	132	122	95	93	93	123	89	65	36	37	211
H2BC12_2955	72	78	178	213	127	132	103	109	121	131	104	131	59	62	71	73	97	84	71	95	116	146	164	171	84	121	128	106	115	100	65	51	72	85	151	192	155	174	131	123	103	84	230	152	66	51	56	72	81
H2BC14_2956	59	67	55	66	80	46	38	26	23	47	59	46	40	27	29	37	46	37	63	61	27	22	115	96	117	105	31	21	139	153	22	28	15	22	13	10	52	28	95	104	35	34	69	74	37	24	6	4	93
H3C10_2957	1145	1272	957	1022	1366	1471	639	660	596	601	718	776	588	503	673	671	849	864	723	784	814	734	2157	2372	1432	1346	614	564	1887	2117	415	428	479	522	339	368	784	831	1028	941	640	621	944	997	509	498	303	316	1614
H2AC19_2963	526	482	802	740	1058	942	408	447	336	381	707	688	446	490	408	386	456	557	550	551	1033	881	2661	2772	2048	1905	403	309	1339	1372	436	510	746	795	488	651	1333	956	1394	1388	466	390	1018	1023	540	431	426	464	848
H2AC19_2964	1145	1266	1402	1472	1847	1841	790	829	643	700	1046	1105	735	710	771	887	940	939	862	953	1737	1507	4331	4500	3273	2794	843	595	1984	2250	718	742	1102	1214	1001	1097	2024	1967	2307	1979	788	750	1615	1522	879	748	771	823	1673
H2BC21_2966	1	1	3	2	6	0	2	2	1	5	7	2	2	4	0	1	2	1	1	0	2	3	1	1	1	2	6	3	2	10	3	2	5	3	1	2	1	2	5	5	4	5	6	6	3	1	3	0	0
HJURP_2968	7	4	6	11	10	18	5	8	5	9	11	4	5	5	6	7	11	7	15	11	4	5	28	13	13	12	8	1	15	21	4	3	11	8	2	8	12	4	9	3	2	1	5	9	3	6	5	7	15
HK1_2971	932	898	1495	1574	1431	1360	923	985	1094	1225	1120	1119	1132	1008	1002	953	1043	866	1137	997	855	798	934	1091	836	735	834	811	909	1061	789	774	759	874	2204	2571	2202	2075	1608	1552	1158	1089	986	866	1334	1256	1573	1692	1263
HLA-A_2975	17	8	79	59	82	88	79	81	20	13	198	217	13	17	17	35	19	10	31	15	95	69	167	180	179	161	16	17	113	110	43	25	40	58	107	158	275	175	257	248	32	21	341	312	46	45	54	52	25
HLA-B_2976	50	51	299	347	520	514	513	500	99	126	1254	1190	131	90	156	122	83	62	75	102	550	443	832	986	927	991	99	86	600	749	206	183	346	367	632	741	1063	780	1239	1221	155	138	1472	1280	320	271	324	395	80
HLA-C_2979	30	22	112	128	166	189	185	161	37	37	389	447	52	35	48	45	27	35	28	17	122	135	188	285	202	219	50	60	112	143	59	68	64	94	132	173	291	230	263	261	43	60	407	341	75	44	90	86	37
HLA-DPA1_2983	0	0	2	1	0	3	0	0	0	2	0	0	0	1	2	0	0	0	0	1	0	0	0	1	0	0	1	1	0	0	0	1	0	0	0	0	1	0	0	0	2	0	1	0	0	0	0	1	1
HLA-DQA1_2987	1	2	10	20	16	13	19	9	3	6	35	39	4	7	5	1	1	6	11	12	6	4	2	6	4	3	17	5	3	3	6	8	2	6	15	13	20	21	20	28	7	7	26	29	13	5	15	8	4
HLA-DQB1_2990	17	14	99	93	118	100	116	98	33	41	277	319	25	39	34	35	19	21	27	36	24	17	14	8	15	13	26	13	12	16	29	22	15	26	37	40	38	21	61	51	28	28	122	80	37	17	24	26	33
HLA-DRA_2993	123	117	986	976	1237	1219	1260	1280	237	312	2382	2419	265	233	423	380	137	142	222	229	175	144	109	127	79	92	424	293	83	87	234	227	176	194	475	567	531	510	799	806	291	240	605	619	267	278	272	315	270
HLA-DRB1_2994	9	16	59	121	75	85	84	69	22	53	253	205	44	31	37	30	7	19	44	19	22	22	11	10	14	13	30	32	18	21	22	22	13	19	45	42	59	30	61	53	23	25	159	88	20	38	23	26	35
HLA-DRB3_2995	1	1	0	1	4	1	4	3	0	0	5	3	0	1	0	1	2	0	0	1	0	0	0	0	0	0	0	0	0	0	1	1	1	0	1	0	0	0	0	1	0	0	1	1	1	3	0	0	1
HLA-DRB5_2997	11	4	28	32	48	51	33	47	20	12	76	92	10	12	17	18	12	5	8	11	10	7	12	9	5	1	13	9	5	1	12	6	11	3	26	24	24	18	22	23	8	7	26	33	5	10	18	14	15
HLA-E_3000	185	156	3715	3705	3058	3136	2432	2345	1012	1233	1880	2211	1216	1075	1679	1676	287	235	194	243	1524	1467	1798	2083	1573	1607	538	431	324	386	519	520	778	805	2448	2912	2775	2999	2591	2433	1022	848	1253	1172	1251	1099	1520	1603	248
HLA-F_3003	1	1	6	9	7	15	12	14	1	0	6	20	1	2	4	1	0	0	0	0	11	7	9	29	19	23	0	0	0	6	5	0	7	12	25	18	38	25	27	28	0	1	14	19	3	3	8	7	0
HMBS_3012	2	0	2	1	3	2	0	1	1	2	2	1	2	0	1	3	0	4	2	0	2	4	1	2	1	4	0	2	2	4	4	2	1	2	1	2	3	0	1	1	1	1	0	1	4	1	1	2	2
HMG20B_3013	17	5	14	9	17	6	6	17	15	15	13	10	20	10	13	19	13	5	18	16	13	8	8	13	14	10	10	8	13	12	12	13	11	8	10	6	7	2	3	15	10	16	7	8	6	9	9	7	13
HMGA2_3022	22	23	63	71	59	41	35	28	18	15	30	30	49	39	50	39	16	20	35	34	108	102	88	97	48	48	35	27	153	193	32	32	85	113	91	107	213	177	188	173	41	20	526	385	29	33	50	61	23
HMGCR_3029	386	398	543	658	579	543	314	371	396	492	574	476	339	274	326	330	331	331	466	369	458	449	552	578	336	274	454	396	483	639	274	280	414	433	431	524	528	446	454	407	371	388	210	157	295	247	270	266	627
HMMR_3040	618	609	583	730	1079	990	482	551	399	483	409	410	401	312	387	424	670	585	403	482	445	511	928	937	871	863	354	336	742	735	211	260	352	428	311	364	437	519	462	525	406	350	466	472	228	226	238	263	886
HMOX1_3041	356	321	323	384	328	322	248	210	362	410	370	435	246	247	240	207	301	246	376	341	480	472	427	443	246	249	218	188	348	396	196	236	326	382	203	233	173	173	92	112	229	267	928	860	215	251	224	224	420
JPT2_3042	273	257	311	267	326	261	169	182	253	249	166	209	223	187	220	208	249	231	173	238	353	356	411	434	248	230	241	171	313	285	215	239	253	295	198	258	252	256	228	184	211	229	147	127	190	232	186	196	395
HNF1A_3043	0	0	0	0	0	0	0	0	0	0	0	0	0	0	0	0	0	0	0	0	0	1	0	0	0	0	0	2	0	0	2	0	0	0	0	0	0	0	0	0	0	0	1	0	0	0	0	0	1
HNRNPF_3064	31	26	58	59	67	64	36	38	50	56	30	47	41	53	49	39	29	33	42	27	56	71	47	67	35	29	48	44	51	48	44	32	49	58	90	112	54	57	54	46	54	44	56	41	52	76	73	59	52
HOMER2_3072	26	27	42	43	47	55	21	20	21	40	37	27	36	23	30	23	22	27	64	29	8	11	17	5	6	19	24	31	41	55	25	30	18	15	11	11	8	6	9	7	22	18	25	24	24	35	17	22	60
HOXA10_3077	13	10	23	21	15	11	3	7	3	4	12	14	8	9	16	1	12	10	15	12	9	6	13	18	11	9	13	5	8	11	5	8	5	13	2	6	10	6	7	4	3	4	2	5	0	3	0	8	17
HOXA5_3080	1	3	2	7	2	3	4	3	4	0	3	2	3	2	3	1	3	3	4	1	0	2	7	0	0	0	3	0	3	6	3	4	9	4	0	1	0	1	1	0	2	1	0	1	0	2	0	1	7
HP_3085	0	0	2	7	4	0	1	0	1	0	1	3	1	0	2	0	2	2	4	1	3	0	0	0	1	2	0	0	0	1	0	1	0	0	4	1	2	0	4	1	1	3	2	4	2	1	1	2	1
HPN_3091	0	0	0	0	0	0	0	4	0	0	1	0	0	0	0	0	0	1	0	0	0	0	0	0	0	0	0	0	0	1	0	0	0	0	0	0	0	0	0	0	0	1	1	0	0	1	0	0	0
HPR_3094	0	0	0	1	0	0	0	0	1	0	0	0	0	0	0	0	0	0	0	0	0	0	0	0	1	0	0	0	0	0	0	0	0	0	0	0	0	0	0	0	0	1	0	0	0	0	0	0	0
HS2ST1_3103	1029	958	1637	1615	1252	1220	986	1007	1799	2050	1160	1256	1344	1239	1028	1032	1065	1035	1118	1184	738	772	857	893	739	758	1742	1345	1274	1339	997	911	601	710	521	566	424	425	521	457	1532	1582	789	728	1082	1004	495	616	1370
HS2ST1_3104	20	21	50	34	25	22	17	25	39	48	27	19	57	26	7	14	26	16	20	24	21	17	14	23	7	14	28	32	16	33	16	23	9	12	14	2	6	12	5	6	30	34	19	18	23	24	5	7	37
HSD17B10_3112	20	10	35	15	50	25	20	17	24	29	14	34	29	27	10	25	18	18	26	29	13	16	18	14	13	12	11	14	17	36	13	27	12	12	19	35	16	19	21	25	19	15	26	22	26	25	19	20	26
HSD17B11_3115	154	101	227	207	246	236	139	112	192	221	136	138	103	133	143	129	168	148	57	180	106	137	134	136	141	133	203	126	200	100	93	95	77	120	51	60	76	93	86	77	161	143	92	124	104	90	52	81	220
HSP90AA1_3127	2176	1966	3716	4022	4328	4574	2150	1980	2078	2295	2085	1990	1907	1870	1794	1884	2417	2530	2447	2193	3700	3298	5432	5630	3239	3115	2603	2534	2360	2996	1699	1861	2322	2437	3072	3716	4801	3626	3413	3228	2555	2454	1937	1505	2130	2211	1941	2248	2907
HSP90AB1_3128	1555	1487	1808	2110	2110	2257	1222	1258	1322	1466	1269	1316	1496	1259	1604	1545	1747	1428	1738	1601	2421	2223	2426	2633	1907	1595	1478	1168	2228	2359	1151	1320	1616	1897	2036	2151	2903	2723	2147	1854	1490	1670	1848	1676	1358	1122	1077	1252	2065
HSPA13_3134	77	74	84	71	82	59	37	43	101	109	65	92	58	82	68	70	82	88	63	85	86	69	95	90	44	54	104	75	89	57	66	60	79	83	45	76	48	62	46	59	95	74	104	133	73	52	71	57	95
HSPA1A_3135	2	5	6	2	5	6	2	0	5	3	4	6	0	1	3	2	7	1	2	1	6	6	3	11	4	9	13	1	2	7	3	3	2	3	11	6	11	8	10	17	2	5	3	3	1	5	7	3	4
HSPA1B_3136	108	98	214	147	140	167	144	128	139	148	137	147	102	135	142	122	127	150	162	146	191	213	267	328	307	273	101	83	141	148	117	93	165	164	322	391	375	330	376	345	141	94	75	85	139	110	137	143	133
HSPA4_3139	2014	1801	2754	3122	2764	2825	1689	1699	2034	2298	2109	1984	1973	1717	1791	1858	2105	2011	2439	2103	2158	2230	2402	2580	1858	1733	2430	2215	2384	3107	1809	1918	1837	2077	1702	1951	2075	1882	1715	1642	2321	2223	2329	1850	1963	1765	1386	1629	2748
HSPA6_3141	0	0	0	0	0	0	0	0	0	0	0	0	0	0	0	0	0	0	0	1	0	1	0	0	0	1	0	0	0	1	0	0	0	0	0	0	1	0	0	0	0	0	0	0	0	0	0	0	1
HSPA9_3143	1	1	2	0	0	0	2	0	3	0	3	1	0	3	2	0	2	0	0	0	2	0	4	0	2	0	0	1	1	0	1	0	0	0	3	0	0	0	1	1	0	1	3	2	0	0	0	1	3
HSPG2_3153	2	5	5	5	0	3	4	1	0	7	0	3	0	2	1	6	8	3	8	6	9	11	11	18	8	18	14	17	14	22	19	12	12	11	1	6	7	2	0	3	9	14	6	7	17	13	9	5	3
HTATSF1_3159	791	856	1143	1682	1070	1426	879	938	1087	1430	939	796	859	791	962	1014	1110	962	954	1009	915	1281	970	1299	809	670	1102	846	1018	878	712	659	728	978	702	965	597	916	585	542	998	1290	651	615	707	696	490	541	1115
HTR5A_3170	0	0	0	1	0	0	0	0	0	0	0	1	0	0	0	0	0	0	0	0	0	0	0	1	0	0	2	1	0	0	0	0	0	0	0	0	0	0	0	0	0	0	0	0	0	0	0	0	0
HTR6_3171	0	1	1	0	0	0	0	0	0	0	0	0	0	0	2	0	0	0	0	0	0	0	0	0	0	0	0	0	1	0	0	0	0	0	0	0	0	0	0	1	0	0	1	0	0	0	0	0	0
HTRA1_3172	2088	2142	3208	3749	2326	2826	1737	1738	3580	3845	1774	2098	2122	1922	1923	1794	2248	2135	2073	2123	1900	1998	1734	2010	1110	1046	3218	3225	1402	1556	1660	1884	1392	1611	1631	1680	1045	1189	734	734	2822	2830	910	753	1876	1978	1279	1448	2375
HYOU1_3177	136	91	180	226	194	157	97	119	108	132	119	125	151	107	108	105	122	119	262	138	153	120	166	184	117	136	108	129	158	259	89	121	150	176	121	132	173	137	156	139	159	146	219	125	148	120	96	127	175
IARS2_3181	120	104	110	139	150	133	71	78	87	133	109	143	112	120	105	117	118	121	121	112	81	88	112	117	92	77	134	110	169	169	107	88	111	106	77	119	98	68	92	82	111	100	111	114	124	92	78	81	170
ICAM1_3187	1	1	18	30	20	17	13	5	29	24	12	2	44	32	19	25	5	0	7	7	286	253	227	258	219	257	197	138	44	27	415	428	299	322	858	1112	715	476	589	563	490	377	89	63	1170	1055	877	988	4
ICMT_3191	8	10	39	16	27	26	14	13	11	17	13	28	26	18	14	18	22	12	18	33	24	13	16	21	13	11	17	5	17	19	17	8	10	18	7	17	14	9	9	10	21	11	6	11	14	14	14	12	26
MRPL58_3192	127	135	126	208	141	176	75	95	128	155	99	73	117	87	94	102	118	100	142	85	102	163	155	178	87	77	109	99	151	167	74	63	62	112	92	123	142	140	95	96	88	122	195	110	72	55	65	93	138
ID2_3198	114	116	198	134	127	117	108	83	154	125	142	135	151	167	107	132	128	101	109	167	153	76	118	122	99	69	63	29	106	92	40	40	89	130	121	126	89	98	123	111	51	46	49	81	58	41	77	98	192
IDE_3201	516	482	624	780	622	712	405	483	606	698	350	434	441	393	449	460	456	428	544	452	405	531	527	642	421	353	548	483	453	557	324	332	311	376	467	500	372	410	355	383	554	506	580	436	372	407	321	366	618
IDO1_3210	0	1	208	136	211	220	124	102	3	0	24	19	21	24	117	103	0	0	0	0	22	25	36	44	39	50	0	1	0	0	0	0	19	7	572	665	762	671	818	715	4	1	5	21	99	44	257	330	1
IER2_3213	571	714	654	759	641	737	363	389	614	545	362	394	349	326	416	451	641	525	431	511	976	930	987	1089	673	560	981	737	838	834	810	759	876	1029	1016	1103	1351	1665	820	810	1051	1129	803	752	619	603	625	715	858
IER3_3214	377	369	215	211	262	258	125	103	206	244	181	218	190	137	142	149	330	341	314	321	469	514	933	944	568	588	788	567	542	573	433	365	603	682	512	635	768	697	495	524	670	660	673	609	456	431	387	387	500
IFI30_3216	4	1	529	715	630	660	523	546	99	85	164	181	209	156	281	263	12	12	5	11	269	315	399	514	345	359	18	18	34	43	63	53	152	154	1146	1344	1747	1732	1546	1499	122	106	160	115	275	324	544	606	11
IFIT1_3219	1805	1675	4017	4592	4717	5122	3178	3236	3422	3678	3898	4393	3329	3075	2861	2840	3229	2812	2409	2734	71805	63266	59815	64540	37159	35815	1302	1203	1510	1650	17923	14836	50327	53668	57792	55703	49796	58487	33872	30649	1742	1746	3950	3825	9357	8685	29420	31002	2384
IFIT2_3222	1	6	52	56	57	59	22	25	38	64	26	26	56	73	35	32	6	6	13	22	330	295	255	289	166	190	6	4	9	8	239	252	401	383	302	391	390	261	336	360	40	38	48	25	266	239	294	364	5
IFIT3_3225	24	17	455	524	428	433	280	265	211	262	220	247	572	433	314	288	41	24	94	36	1121	1125	1259	1201	843	871	21	33	62	82	469	610	1237	1345	1318	1512	1702	1142	1370	1235	242	240	380	244	840	881	1154	1313	21
IFITM1_3226	331	296	4945	5604	5301	5150	4795	4877	1071	1215	3098	3295	1614	1365	2266	2137	640	596	587	485	6344	5859	9988	10779	9565	9259	610	540	633	875	1054	970	2877	3014	8093	8451	13256	12211	13604	12430	825	873	3415	2897	1795	1764	3224	3502	395
IFNAR1_3235	61	42	85	143	64	97	62	58	97	127	90	82	104	75	57	72	59	66	110	86	108	84	71	98	84	56	147	124	97	122	94	104	90	122	44	97	78	52	53	63	111	101	91	84	131	130	79	72	60
IFNB1_3236	0	0	0	0	0	0	0	1	0	1	0	0	0	0	0	0	0	0	0	0	0	0	0	0	0	0	2	0	0	0	0	0	0	0	0	3	0	2	0	0	0	0	0	0	0	1	0	3	0
IFRD2_3246	21	12	35	29	28	39	11	14	16	20	16	34	17	27	24	16	12	24	33	33	40	32	38	26	21	28	7	14	30	44	20	31	30	37	17	34	36	26	23	12	26	15	55	52	22	18	26	33	37
IGF1R_3254	520	477	437	541	389	405	304	259	520	711	464	505	488	452	273	332	445	465	589	486	335	366	323	396	254	282	738	595	675	854	569	538	320	441	158	149	179	182	185	163	717	688	394	390	558	559	178	170	664
IGF2BP2_3259	25	20	31	35	21	32	23	22	24	21	57	32	43	28	20	28	25	36	56	32	18	13	11	14	12	16	40	31	37	75	39	23	31	35	25	22	25	10	22	14	21	29	89	66	22	38	28	26	30
IGF2R_3263	994	841	2087	2360	1407	1867	1500	1391	1348	1844	1104	837	1451	1249	1571	1338	1383	1012	1104	1166	1153	1584	1311	1829	1413	864	1665	1232	1389	1013	866	801	874	1041	1586	1981	1302	2037	1386	1101	1391	1827	1616	1171	1091	1000	1015	1238	1313
IGFBP1_3266	1	0	0	0	0	0	0	1	0	0	0	0	0	0	0	0	0	0	1	0	0	1	0	0	0	0	2	0	0	0	0	0	2	0	0	0	1	0	0	1	0	0	1	7	0	0	0	0	0
IGFBP3_3270	1965	1732	883	1015	630	685	187	188	820	897	297	330	668	683	790	826	1481	1605	1303	1844	4305	3862	3191	3486	1753	1485	1890	1531	2138	2016	1402	1565	3001	3576	2115	2421	2245	2036	1379	1134	1188	1074	680	656	1019	870	1441	1637	2216
IGFBP4_3271	2	1	1	0	4	2	1	0	2	2	0	0	1	2	1	2	2	2	0	0	16	10	14	14	15	9	1	1	2	3	0	5	2	8	17	50	63	35	60	55	1	1	5	14	7	2	7	8	0
IGFBP6_3273	2	0	3	5	1	0	0	2	3	1	1	4	3	4	0	4	0	4	3	2	0	1	1	0	3	5	9	1	7	5	2	3	3	0	2	0	1	1	1	2	4	3	7	8	2	0	2	2	4
IGHV3-23_3276	0	0	0	1	0	0	1	0	1	2	1	0	0	0	0	0	0	1	0	1	0	0	0	0	0	0	4	0	1	0	0	1	0	1	1	0	2	0	0	0	0	3	0	0	0	1	1	0	2
IGKC_3281	4	0	0	2	0	1	2	0	1	2	0	1	6	0	2	4	0	0	0	0	0	0	2	2	0	0	0	0	0	1	0	1	0	0	0	2	0	0	0	0	1	0	0	0	0	3	2	0	1
IGKV1-5_3282	0	0	0	0	0	0	0	0	1	0	0	0	0	0	0	0	0	0	0	0	0	0	0	0	0	0	0	1	0	0	0	0	0	0	0	0	0	0	0	0	0	0	0	0	0	0	0	0	0
ELP1_3288	651	696	798	947	779	878	559	593	751	909	640	734	654	533	512	553	782	654	689	649	476	479	621	682	550	523	751	702	687	783	426	481	370	498	246	261	304	373	371	364	743	732	689	573	512	426	266	256	998
IKBKB_3289	104	57	170	137	146	162	124	88	125	144	143	147	90	105	120	127	117	111	88	126	216	187	211	185	162	135	301	186	143	121	226	201	167	208	127	194	113	111	134	112	253	180	93	136	236	228	116	159	155
IKBKE_3290	10	0	17	15	12	4	5	8	8	5	11	5	4	7	2	1	5	4	7	8	33	21	50	31	40	39	11	1	24	32	21	11	36	38	33	48	53	31	38	66	5	10	12	21	12	13	18	22	8
IKBKG_3291	85	66	136	132	106	128	75	73	99	111	72	98	66	83	95	99	92	52	83	115	162	110	128	145	99	80	131	107	93	93	66	94	90	106	113	145	110	116	89	77	107	69	107	104	65	57	88	98	117
IKZF1_3292	0	0	0	1	0	0	0	0	0	0	0	0	0	0	0	0	0	0	0	0	1	0	1	0	0	2	0	0	0	0	0	0	0	0	0	0	1	2	0	1	0	0	1	0	1	0	0	0	0
IKZF1_3293	0	0	0	0	0	1	3	2	1	0	0	0	0	0	1	2	0	1	0	0	0	2	2	0	1	2	2	1	0	0	0	0	0	1	3	0	1	0	1	1	1	0	0	0	0	0	3	0	0
IKZF1_3294	0	0	0	0	0	0	0	0	1	0	0	0	0	0	0	0	0	0	0	0	0	0	0	0	0	0	0	0	0	0	0	0	0	0	0	1	0	0	0	0	0	0	0	0	0	0	0	0	0
IL13RA1_3309	58	44	85	130	86	68	77	61	87	107	101	106	88	71	62	56	27	53	95	68	62	63	79	76	67	73	104	74	81	109	83	74	49	52	59	90	66	53	61	55	96	85	68	63	93	81	44	60	66
IL1B_3325	4	5	4	2	1	10	7	8	8	5	1	9	6	8	3	6	5	1	8	8	85	112	115	126	66	78	71	66	21	30	68	62	61	93	95	123	84	84	43	30	49	38	33	24	41	50	72	66	9
IL1R1_3326	9	5	23	26	19	26	11	7	35	28	16	13	25	25	12	22	13	5	17	5	13	16	12	24	11	6	26	21	1	12	12	8	14	7	13	21	19	11	10	12	26	15	12	10	14	23	9	14	14
IL20_3330	0	0	0	0	0	0	0	0	0	0	0	0	0	0	0	1	0	0	0	1	0	0	1	0	0	0	0	0	0	0	0	0	0	0	0	0	0	0	1	0	0	0	0	0	0	0	0	1	0
IL36B_3336	0	0	0	4	1	0	0	0	0	0	0	0	0	0	0	0	0	0	0	0	0	0	1	1	0	0	0	0	0	0	0	0	0	0	0	0	0	0	0	0	0	0	0	0	0	0	0	0	0
IL36G_3337	1	1	0	0	0	0	0	0	0	1	0	2	0	0	1	0	0	1	0	0	0	0	0	2	0	0	0	0	0	0	0	2	0	0	0	0	0	0	0	0	0	1	2	0	0	0	0	0	0
IL4R_3339	4	2	7	5	3	5	6	5	7	10	8	1	6	6	6	11	3	2	9	7	11	10	5	14	17	9	5	11	12	19	7	27	8	11	7	10	13	7	18	8	9	14	28	8	18	21	7	12	5
IL6_3341	1	0	1	1	1	0	0	0	0	0	0	0	0	0	2	2	0	1	0	2	2	1	2	4	3	2	0	3	0	1	2	0	0	0	0	0	4	2	7	1	1	3	0	4	0	0	0	0	0
IL7R_3347	25	24	14	7	13	11	3	1	9	19	3	6	16	4	9	3	10	8	17	13	69	73	62	64	51	52	95	77	51	64	63	60	58	55	156	158	159	174	137	158	94	74	17	26	90	72	88	102	46
ILF2_3354	839	822	1091	1193	1234	1313	693	604	914	951	700	710	692	655	810	755	816	795	846	883	963	961	1186	1221	746	724	1039	947	1094	1156	637	680	736	806	746	834	809	716	570	620	1034	951	798	737	852	816	638	748	1086
ILK_3355	344	314	496	617	496	635	292	308	302	330	246	296	197	190	322	314	328	251	230	247	502	589	603	660	358	318	421	346	377	438	330	350	427	506	658	729	567	627	488	428	348	380	285	252	337	297	481	504	391
INHA_3371	0	0	0	0	0	0	0	0	0	0	0	2	0	0	0	0	2	0	0	0	0	0	0	1	0	0	0	0	0	0	0	0	0	1	0	1	0	0	0	0	3	1	0	0	0	0	0	0	0
INHBA_3372	0	0	0	0	0	0	0	0	0	1	0	0	2	1	0	0	0	0	0	0	0	0	0	0	0	0	1	0	0	1	0	0	1	1	1	0	0	0	0	0	0	0	0	0	0	0	0	1	0
INPP1_3376	2	1	6	6	5	2	2	0	5	3	5	7	0	6	5	2	0	1	0	2	0	4	3	3	2	11	0	2	4	4	1	3	4	2	4	2	5	1	2	8	4	1	2	1	5	5	3	4	8
INPP4B_3379	56	58	48	56	36	42	22	24	65	101	44	45	39	36	20	31	67	53	42	74	22	20	14	22	13	18	77	35	32	32	29	23	9	19	16	15	14	10	11	12	83	66	7	17	41	26	22	32	141
INS_3382	1	0	0	0	0	0	0	0	1	3	0	0	0	0	0	0	0	0	0	0	0	0	0	0	0	0	0	0	0	0	6	0	2	0	1	1	1	1	1	1	0	2	1	1	0	0	0	0	1
INSIG1_3385	220	196	245	316	332	320	201	229	164	206	223	241	112	141	136	187	144	147	176	145	181	182	226	268	150	171	79	63	194	234	101	66	171	153	629	621	756	684	619	580	97	105	80	60	151	163	313	331	303
IPO13_3398	3	1	6	3	10	5	1	6	6	6	4	7	5	12	3	2	4	4	4	4	0	2	3	5	4	2	3	6	4	14	7	1	6	1	1	2	0	2	2	7	7	4	8	2	10	1	1	1	3
IPO5_3401	343	324	375	441	420	445	255	241	297	380	383	337	391	337	257	302	355	367	482	396	400	385	374	373	224	278	435	370	493	556	279	326	376	392	203	256	221	167	190	189	393	351	635	634	323	331	217	252	439
IQGAP1_3404	981	943	1528	1666	1590	1529	967	955	1162	1422	1383	1265	1249	1044	928	969	925	1075	1445	1131	1429	1287	1465	1570	1114	1059	1524	1500	1439	2019	1172	1177	1218	1382	1466	1768	1532	1255	1277	1090	1325	1484	1626	1341	1376	1373	1176	1435	1464
IRF7_3410	1	6	30	26	13	28	9	16	9	15	11	14	30	21	19	15	3	8	16	9	72	61	91	97	68	69	5	5	7	23	33	37	63	62	60	76	99	60	73	74	14	20	27	29	35	44	37	46	12
IRS1_3411	4	10	4	9	12	9	6	4	6	8	11	12	5	9	3	2	6	10	1	10	4	12	8	15	7	9	12	7	5	8	4	4	1	7	2	2	5	2	2	6	2	2	12	12	0	2	4	2	16
ISG15_3415	56	45	299	314	286	308	265	235	82	100	298	277	122	113	168	143	128	146	97	79	1201	1091	1840	2006	1638	1659	23	19	80	109	205	203	726	749	1120	1273	1863	1311	1920	1727	59	85	380	367	270	273	653	604	79
ISL1_3417	2	0	0	0	0	0	3	1	0	0	0	0	0	0	0	0	0	0	0	1	0	0	0	0	0	0	0	0	0	0	0	0	0	0	0	0	0	0	0	0	0	0	0	0	0	0	0	0	0
ISOC1_3421	55	36	79	48	67	77	48	28	74	68	24	40	37	31	42	39	44	46	46	52	99	106	152	138	65	67	104	99	79	59	94	72	76	87	131	164	121	114	80	68	77	70	50	40	84	62	100	99	73
ITFG1_3424	34	28	46	71	56	43	25	38	56	49	58	52	53	63	40	31	25	43	63	39	37	40	26	29	41	32	53	40	36	70	36	54	34	33	14	22	32	24	33	22	48	39	32	43	44	45	28	26	59
ITGA1_3425	5	2	4	5	1	1	3	5	2	4	1	0	0	0	2	0	2	0	2	3	8	18	12	11	19	6	2	0	9	6	3	2	8	6	5	7	5	10	6	10	1	1	7	8	2	2	6	10	5
ITGAE_3432	109	110	133	122	100	122	70	69	98	110	81	81	96	94	103	89	99	113	138	127	89	70	84	69	41	40	108	104	117	115	76	77	86	83	39	50	59	38	42	26	116	87	83	69	113	77	55	93	143
ITGB1_3438	990	899	1354	1326	1157	1158	899	763	1097	1190	1042	1129	1117	1111	880	861	895	1052	1158	1278	1081	1042	1088	1199	957	881	1497	1182	1719	1961	1099	1081	1111	1202	752	973	754	648	755	743	1225	1075	982	1000	1277	944	777	858	1454
ITGB1BP1_3441	25	15	25	37	44	27	11	17	22	36	17	22	16	20	7	8	15	14	19	27	11	22	27	19	6	14	19	12	22	15	21	15	22	8	13	30	24	15	20	10	21	22	13	14	19	23	9	18	17
ITGB5_3450	77	65	190	103	146	109	108	57	133	167	129	144	94	141	91	103	117	95	80	119	86	67	73	61	40	58	164	128	97	72	93	90	77	93	47	66	39	26	29	49	115	116	40	68	123	94	65	63	162
JAK1_3463	219	169	351	296	306	232	185	170	260	347	261	247	193	209	193	192	247	253	213	251	636	637	514	579	367	385	668	488	382	346	513	496	496	536	749	947	508	508	477	492	576	452	247	301	624	531	577	635	312
JAK2_3466	54	48	246	236	225	239	143	122	131	138	61	52	186	209	207	166	48	37	46	42	324	295	400	356	217	218	121	117	74	69	218	208	279	286	819	989	660	629	545	511	204	174	115	82	380	467	558	662	69
JMJD6_3471	293	299	379	380	342	385	238	276	337	341	256	302	400	311	290	243	328	229	275	242	333	318	395	414	295	309	463	417	321	407	327	328	304	321	486	579	450	472	415	369	445	394	293	293	412	414	348	363	494
JUNB_3476	181	186	246	274	189	168	150	139	410	493	172	161	156	147	139	143	201	209	180	225	867	1005	1029	1228	774	747	1743	1548	430	479	969	776	716	763	1551	1673	1292	1559	1154	1090	2339	2068	356	262	1276	1191	996	1069	247
KAT6A_3486	186	151	211	295	247	237	175	185	212	224	280	240	209	166	189	160	170	191	241	201	193	187	247	238	199	208	256	198	260	311	182	149	164	170	116	159	152	125	166	123	213	205	228	236	226	207	119	147	255
KAT6B_3489	250	224	261	374	250	254	194	207	301	358	238	306	209	203	179	187	278	236	284	281	163	155	208	238	176	130	334	254	273	338	120	119	96	97	183	192	185	179	173	147	235	281	243	230	118	119	70	99	302
KCNF1_3502	5	6	3	1	2	1	1	4	3	3	2	3	8	6	1	3	7	5	3	7	8	7	2	0	4	1	2	1	15	5	4	0	1	7	4	0	2	4	4	4	2	6	11	12	0	1	0	4	13
KCNG1_3503	2	1	1	0	0	0	0	0	0	2	0	0	0	0	0	2	3	2	0	1	0	0	0	0	0	1	0	0	0	0	0	0	0	0	1	0	0	0	0	0	1	0	1	1	0	0	0	0	1
KCNJ18_3509	0	0	0	0	1	0	0	0	0	1	2	1	0	0	0	1	0	0	0	0	0	0	1	0	0	0	1	0	0	0	0	0	0	0	1	1	0	0	0	0	0	2	0	0	0	0	0	0	0
KCNK1_3516	2	0	0	0	0	0	0	0	0	0	1	1	0	0	0	0	0	0	0	0	0	1	0	0	0	0	0	0	0	0	0	0	0	0	0	1	0	0	0	1	0	1	0	0	0	0	1	0	0
KCNK4_3519	2	1	1	1	2	0	2	1	3	3	1	3	1	0	1	0	2	0	0	0	1	1	0	4	0	2	4	2	0	0	0	0	1	2	0	2	5	2	0	2	0	0	0	2	0	3	2	0	2
KCNQ2_3525	0	2	3	1	1	0	0	0	4	1	7	2	0	0	1	0	0	0	2	1	1	0	4	2	0	0	0	0	0	1	1	0	0	2	0	2	1	0	1	0	2	2	1	0	0	1	1	1	1
KCNQ3_3528	8	2	11	11	3	6	5	4	5	10	5	5	18	9	1	5	7	9	2	18	39	43	23	26	9	13	6	6	7	14	35	24	43	31	70	75	36	35	21	18	12	9	2	3	34	30	32	33	7
KCTD5_3534	16	17	30	32	24	17	14	14	35	22	31	25	21	33	12	25	14	13	29	26	30	19	32	24	15	19	31	21	21	21	26	24	24	27	17	30	22	11	14	11	34	23	28	39	30	21	21	24	26
KDELR2_3540	1656	1426	2008	1873	1819	1798	1013	1019	1703	1727	1213	1345	1274	1178	1213	1250	1469	1341	1157	1490	2099	1854	1808	1920	1140	1148	1890	1535	1645	1677	1231	1185	1462	1706	1655	2000	1619	1543	1249	1167	1628	1430	1117	1151	1301	1185	1327	1387	2150
KDM3A_3541	250	257	371	446	275	322	167	224	388	410	210	220	209	175	218	179	243	195	159	211	323	346	385	393	194	213	446	369	229	251	154	162	131	154	280	276	288	325	298	234	293	266	170	158	142	120	110	133	323
KDM5A_3544	517	524	864	923	718	750	542	561	800	829	592	670	589	470	613	515	557	475	548	544	585	670	698	818	487	521	651	499	633	749	503	483	454	514	439	499	500	615	452	438	679	749	571	543	503	535	452	481	705
KDR_3546	5	4	10	2	6	2	0	3	2	7	2	3	2	2	4	5	1	4	5	4	4	5	3	12	2	3	4	0	6	7	2	5	5	8	13	10	12	15	10	11	3	6	13	10	2	2	2	6	7
KEAP1_3547	63	54	107	82	84	81	52	45	68	83	81	66	65	55	40	71	60	62	92	66	72	61	88	78	85	118	54	39	83	94	46	57	55	69	59	72	81	59	86	98	53	59	124	84	48	40	37	38	79
KIAA0100_3554	104	91	122	184	145	129	108	105	121	105	164	156	139	112	82	82	99	113	184	108	117	114	147	127	95	120	120	96	167	187	119	116	111	111	97	125	110	92	101	105	124	132	135	111	99	122	91	68	160
PCLAF_3555	8	9	5	10	5	11	8	4	7	6	3	10	1	3	3	7	3	7	22	12	15	20	22	16	7	6	8	4	21	16	1	3	7	15	1	5	8	7	8	8	4	9	1	3	7	9	5	3	15
WASHC5_3558	364	399	621	634	628	573	352	385	562	630	512	524	491	452	407	386	433	361	469	460	434	414	487	486	371	369	655	557	593	697	348	367	379	452	312	412	397	314	346	304	542	516	514	445	410	389	286	375	508
KIAA0355_3561	116	113	152	155	125	115	90	99	176	169	155	156	121	134	89	83	136	116	93	128	107	88	110	143	123	114	176	149	145	126	126	106	102	91	53	69	83	68	120	71	141	165	130	177	123	135	73	53	171
KHDC4_3570	229	231	307	319	323	296	197	210	278	316	255	252	247	187	274	217	296	244	231	240	275	370	353	464	276	281	239	216	308	324	209	212	228	299	261	265	218	347	304	275	247	294	303	286	182	181	194	216	315
WASHC4_3574	145	142	280	331	324	278	190	152	224	218	204	178	261	230	233	214	141	126	187	165	458	453	475	526	313	316	247	183	209	250	270	301	475	450	578	668	489	403	408	376	240	235	288	221	368	355	505	531	203
KIFBP_3583	167	150	259	197	191	227	118	113	189	230	192	213	220	181	151	154	172	175	181	197	184	155	185	188	207	167	351	281	214	231	180	209	201	212	116	140	149	104	151	160	201	176	108	126	246	165	110	157	227
KIF11_3588	1130	1114	1165	1399	1649	1795	801	873	673	821	671	739	567	522	727	831	1102	953	706	838	1220	1248	1854	2004	1454	1368	772	656	1271	1398	381	411	678	696	432	522	805	820	853	772	765	642	571	544	422	365	378	422	1682
KIF14_3592	361	425	377	429	615	664	279	298	264	251	221	209	177	169	267	243	427	328	272	310	292	304	494	532	479	541	258	203	411	479	142	163	263	266	173	144	216	234	260	232	293	227	242	246	156	129	153	153	560
KIF15_3595	221	195	171	270	345	336	168	174	167	225	183	158	143	141	133	139	243	222	222	214	285	372	426	462	297	299	188	155	291	282	107	127	151	139	99	123	164	141	157	164	175	176	91	115	118	143	75	62	393
KIF18B_3598	15	7	11	10	13	15	8	7	6	10	10	9	4	5	3	5	5	8	8	16	7	18	32	25	33	25	2	0	25	29	7	10	11	2	6	5	6	15	15	8	5	2	11	7	6	8	1	8	19
KIF20A_3601	598	632	628	834	1070	1174	638	613	339	446	453	482	331	331	382	386	774	648	479	490	360	368	770	812	883	754	462	390	783	856	239	274	260	337	216	293	362	371	335	367	408	485	278	255	231	190	157	207	789
KIF2C_3603	647	687	642	750	988	1116	535	594	397	419	448	414	304	291	414	444	694	597	448	519	653	769	1214	1307	1196	1107	306	275	787	897	318	287	503	541	324	398	571	629	621	554	328	339	584	483	307	251	320	368	1017
KIF5C_3612	247	230	345	368	297	280	250	261	312	308	314	305	354	300	306	257	235	205	313	273	262	242	193	225	150	128	401	363	263	312	255	261	244	261	168	154	105	116	119	102	320	303	274	243	292	268	196	241	296
KIT_3617	0	8	1	2	0	3	0	0	6	3	1	2	3	3	0	0	8	6	2	4	4	5	5	5	1	5	3	0	12	12	1	1	1	0	0	3	1	1	0	0	6	1	10	4	0	1	0	3	11
KLF6_3626	155	145	224	260	348	377	159	186	461	547	225	289	249	263	185	190	128	131	126	159	245	237	406	447	221	264	310	265	178	179	417	334	321	374	547	564	659	611	499	443	882	784	241	222	957	822	605	617	209
KLHDC2_3630	948	875	1334	1318	1135	1111	813	766	1291	1388	900	1091	866	920	716	710	979	795	706	891	688	659	796	844	702	562	1333	1033	1092	986	664	627	581	610	362	488	394	409	473	484	1167	1110	683	646	741	634	339	437	1311
KLHL21_3635	39	28	31	50	44	45	24	22	40	76	45	39	24	40	38	23	23	25	37	32	58	61	67	80	40	41	56	41	36	45	36	36	40	31	28	45	48	56	34	33	57	54	40	60	41	34	22	18	58
KLHL9_3643	129	135	207	218	185	198	140	83	173	274	117	142	144	118	112	149	138	137	104	129	146	139	138	199	116	91	173	205	124	125	130	145	86	131	108	130	111	106	111	108	223	210	121	88	165	136	77	129	180
KLK2_3651	0	0	0	1	0	1	2	0	1	0	4	0	0	0	0	0	0	0	0	1	0	0	0	0	0	0	2	0	0	0	0	0	0	0	0	0	1	0	1	0	0	0	0	0	0	0	0	0	0
KNSTRN_3668	345	260	290	286	399	419	194	206	176	197	235	217	192	163	198	219	287	269	276	258	226	209	333	370	324	340	179	159	323	418	136	163	231	273	171	174	179	184	212	136	199	147	241	244	148	148	130	153	428
KRT17_3687	0	0	0	0	0	0	1	0	0	1	1	1	0	0	1	0	3	1	0	0	0	1	0	0	1	0	0	0	2	6	1	1	0	0	1	0	0	0	0	0	1	0	1	0	3	3	1	1	0
KRT19_3690	0	1	2	0	1	0	0	0	1	0	0	0	0	0	0	0	0	0	0	0	0	0	0	0	0	0	2	0	0	0	0	0	0	0	1	0	0	0	0	1	0	1	0	0	0	0	0	0	0
KRT7_3703	1	0	0	0	0	1	0	1	0	2	2	0	0	1	0	0	1	0	0	0	2	2	0	2	2	0	0	0	3	2	0	0	0	1	1	0	0	2	1	0	2	0	3	9	0	0	0	0	0
KTN1_3708	309	310	435	551	400	451	304	253	418	372	389	375	367	298	336	335	380	314	472	397	419	392	484	475	348	349	549	508	418	512	358	364	386	451	392	443	508	344	372	288	489	508	546	421	411	450	350	410	509
L1CAM_3714	6	6	7	3	7	8	5	10	7	4	4	5	8	15	14	4	7	10	13	10	38	33	30	34	37	34	6	8	69	92	21	15	29	40	49	42	30	40	38	15	18	11	47	42	18	21	36	23	12
LAGE3_3716	128	120	114	130	119	112	81	76	147	148	134	115	128	107	93	108	118	103	130	126	84	72	68	98	62	59	67	63	135	142	67	88	77	87	63	63	24	42	30	29	109	141	113	92	109	109	54	60	154
LAMA3_3717	0	3	4	1	8	0	1	2	1	0	1	4	0	0	2	1	1	0	0	2	3	4	9	8	9	4	2	0	4	1	0	2	0	3	21	18	38	24	22	39	0	1	2	8	2	7	8	9	2
LAMB3_3722	0	0	1	3	0	0	0	0	1	2	0	0	0	0	1	0	0	1	0	0	0	0	0	0	1	0	0	0	2	2	1	0	2	1	0	0	1	0	0	0	0	0	0	0	0	0	0	0	0
LAMC2_3727	1	0	2	0	3	0	2	1	2	1	0	3	2	0	3	2	1	2	2	2	1	6	5	14	2	5	6	5	6	6	5	5	4	5	1	4	5	2	1	1	2	7	6	5	0	1	0	0	1
LAMP1_3730	3384	3822	5721	6343	4140	4575	3240	3454	5991	5940	3747	4124	3940	3741	3800	3846	3866	3672	3570	3951	4869	4298	3681	4322	3216	3042	3494	2843	3870	3854	3467	3333	3105	3672	4359	4611	3553	4015	3201	3177	5148	5514	3223	2864	3796	3485	2922	3248	4714
LAP3_3740	906	887	13336	15551	14247	14737	8000	8844	1909	1887	3327	3657	2816	2508	6887	6663	1202	1115	883	948	20349	18037	20817	22566	13481	13190	1029	879	1778	1852	3055	2810	8181	8805	38284	36189	38669	46352	26965	25409	2718	3009	4782	4379	5911	5611	13385	14538	1253
LBR_3754	55	49	61	48	83	76	44	36	65	53	50	72	68	49	26	43	47	59	39	64	61	50	74	80	64	58	89	62	102	74	64	51	49	69	30	29	48	26	43	45	51	60	76	63	54	30	31	36	68
LCP1_3761	1	4	7	7	5	7	3	1	1	1	0	2	3	1	3	2	4	0	0	1	2	8	6	5	3	2	6	4	3	4	6	9	9	3	21	21	21	17	9	15	9	6	2	3	4	3	8	10	5
LDHA_3766	557	381	652	576	843	851	402	344	450	544	603	583	374	459	351	380	513	585	494	573	645	634	1154	1224	940	957	615	425	831	748	381	393	501	534	691	855	1455	1247	1765	1664	527	433	361	469	519	415	351	427	791
LGALS8_3781	20	19	44	47	28	39	30	31	34	26	31	30	31	18	24	18	15	25	32	19	64	55	64	62	55	50	22	15	21	39	36	26	67	50	74	81	81	43	61	72	25	21	29	36	67	57	69	68	28
LGMN_3782	135	170	346	420	316	363	257	247	195	176	136	136	163	162	208	212	135	116	116	130	760	749	920	934	632	620	152	123	103	104	166	154	357	458	1260	1402	1371	1653	1274	1161	187	220	144	97	280	182	560	566	185
LIG1_3795	23	19	35	72	54	44	45	20	20	26	29	25	9	26	32	28	25	21	24	38	55	61	62	77	40	44	9	14	55	49	18	20	28	42	48	42	42	25	38	35	18	15	11	16	22	23	35	29	51
LINC00621_3801	0	0	2	0	0	0	2	0	0	0	1	1	0	0	1	0	0	0	0	0	0	1	0	0	0	1	1	0	0	0	0	0	0	0	0	0	0	0	0	0	3	1	0	0	4	0	0	0	3
LINC00623_3802	6	3	14	21	22	18	24	18	13	20	14	5	14	19	23	15	6	6	7	4	30	45	33	54	31	28	18	20	14	22	33	32	27	19	37	42	24	57	49	45	38	31	53	42	32	34	35	24	7
LINC00623_3803	3	0	5	8	3	3	1	5	0	2	1	1	0	2	4	4	0	1	1	0	0	1	1	1	0	0	4	0	0	0	1	0	0	0	2	0	1	3	2	1	0	2	1	2	1	1	0	0	1
LIPA_3812	915	964	1385	1656	1212	1296	949	1144	1381	1596	953	1137	1028	848	899	899	1004	803	954	908	1318	1461	1561	1761	1163	1068	1074	1079	846	909	994	840	1020	1092	1324	1375	1301	1584	1257	1069	1077	1187	693	582	849	824	787	928	1172
LOC102606465_3829	66	61	48	83	66	55	52	60	65	69	73	74	48	41	39	58	65	58	96	79	35	52	52	72	47	48	57	66	58	95	42	31	59	54	25	29	34	32	31	26	57	47	151	99	37	33	21	36	76
IGKV1-9_3838	0	0	0	0	0	0	0	0	1	0	0	2	0	1	0	0	0	0	2	0	0	0	0	1	0	0	0	0	0	0	0	0	0	1	0	0	0	0	0	0	0	0	2	2	0	0	0	0	0
LOXL1_3850	1818	1835	2159	2413	2033	2146	1506	1547	1811	1904	1972	1921	1691	1587	1475	1501	1824	1780	2128	1971	3003	2557	3079	3361	2584	2481	2385	2137	2484	3194	1746	1836	2150	2375	2455	2732	2713	2501	2487	2415	2008	2016	1690	1496	2003	1861	1761	1980	2622
LPAR2_3854	29	10	23	16	19	19	24	19	26	27	17	24	8	16	6	11	17	22	23	26	9	11	12	17	17	7	8	8	26	18	17	17	16	7	3	8	6	13	11	11	24	19	14	8	28	10	5	5	12
LPGAT1_3859	5	2	13	5	9	4	8	7	6	9	10	9	9	4	5	3	10	3	4	7	5	2	7	5	6	8	8	9	5	11	14	5	11	15	6	3	3	4	2	5	7	9	13	6	5	11	7	2	15
LPIN3_3865	1	0	0	0	2	0	1	1	0	0	1	0	0	0	0	0	0	0	1	1	0	0	4	0	1	2	0	0	0	0	0	0	0	0	0	1	0	0	2	2	2	5	3	0	2	0	1	1	1
LRP10_3874	890	795	1548	1660	1316	1279	1109	1063	1172	1288	1118	1178	963	893	968	977	831	759	861	925	1238	1182	1193	1228	1041	1015	1267	1061	912	927	871	887	925	1036	1413	1659	1436	1351	1505	1345	1123	989	867	790	946	881	988	1016	1119
LRPAP1_3876	8	5	7	15	15	10	9	8	5	6	15	15	16	6	9	17	16	18	16	16	3	3	9	4	7	3	10	9	14	20	11	11	10	10	1	1	3	3	4	3	7	7	9	7	7	13	3	1	29
CARMIL1_3881	126	119	184	259	208	210	143	161	238	331	162	175	210	171	138	139	140	120	105	123	69	86	118	146	124	87	160	155	135	136	98	83	56	53	68	79	111	95	79	84	229	186	97	66	141	101	51	38	151
LRRC41_3882	689	655	809	959	722	753	501	577	757	920	535	587	607	561	579	570	666	577	451	654	513	609	645	705	492	480	930	691	698	684	515	518	466	542	461	586	533	493	529	498	733	687	723	695	558	557	430	478	931
LSM1_3888	254	176	296	253	253	273	161	130	242	233	239	268	177	229	170	219	210	230	153	259	229	211	236	245	184	197	256	163	274	229	184	190	248	286	212	291	226	211	218	229	237	176	192	256	260	170	211	218	295
LSM5_3894	614	452	642	606	787	805	413	385	504	522	387	499	409	358	402	427	555	558	419	558	569	619	743	816	565	474	515	478	728	692	348	365	430	503	331	445	428	434	408	397	537	476	608	598	410	348	348	316	643
LYRM1_3916	118	99	167	197	140	181	108	118	141	144	125	126	119	106	123	100	129	111	108	119	129	118	132	144	82	95	157	125	96	141	95	93	102	112	153	176	184	160	150	108	163	140	128	157	127	125	134	127	124
LYSMD3_3919	3	4	2	3	5	2	2	1	2	5	11	1	1	4	2	1	0	0	3	1	1	1	2	3	1	4	0	1	4	0	1	1	0	5	1	1	3	4	1	0	0	3	0	1	2	2	0	2	1
MACF1_3927	144	117	171	167	134	158	82	89	126	149	156	141	161	139	107	100	142	125	228	150	185	170	155	137	119	113	183	146	217	315	162	239	237	230	152	195	151	115	155	130	171	218	354	248	279	242	187	202	205
MAD2L1_3930	52	25	44	22	54	47	25	27	27	25	27	32	31	20	22	21	23	43	28	41	55	36	54	69	48	59	47	35	60	62	13	11	30	43	22	13	28	17	38	36	25	23	43	32	10	9	20	13	63
MALAT1_3940	30923	35307	56486	65632	37121	45448	27991	30689	55903	59556	27523	32766	30490	31201	32067	31654	36687	30641	25512	34567	32888	32444	27963	31841	19160	17974	47576	42267	21582	18688	29627	29650	22305	27677	31155	31678	18301	25116	13685	13722	51496	58780	23750	19667	24778	24527	17113	20001	32399
MALT1_3941	1181	1175	1244	1374	1346	1247	730	712	1251	1484	853	991	1022	930	976	965	1179	903	769	849	1857	2003	1914	2076	1383	1309	2212	1907	1157	1252	1753	1432	1478	1551	2366	2533	1979	2246	1645	1587	1780	1515	983	825	1560	1296	1907	2004	1692
MAN2B1_3947	44	43	71	67	75	62	44	64	88	82	74	77	79	84	47	48	35	48	84	80	85	70	68	68	85	61	70	59	110	133	80	68	68	71	73	48	66	56	71	64	81	105	75	69	82	72	62	64	76
MAP1LC3A_3963	47	42	73	65	58	43	33	43	53	82	44	56	53	40	52	40	51	37	41	42	45	36	23	19	21	27	49	61	40	40	45	40	34	29	45	45	18	29	25	16	59	65	38	46	36	41	32	32	70
MAP1LC3B_3964	33	27	32	47	21	35	32	17	24	33	38	36	32	32	23	15	26	27	34	24	26	18	18	21	15	13	41	23	20	36	45	23	26	31	15	25	16	11	14	18	38	20	65	53	36	20	12	16	29
MAP2_3965	405	298	401	402	447	362	304	239	462	495	492	508	408	455	289	346	398	432	473	475	312	279	288	278	191	202	562	379	301	302	317	335	290	325	174	179	200	178	130	166	476	402	181	202	405	367	198	252	473
MAP2K5_3975	12	16	18	26	20	19	20	26	22	22	21	24	11	18	22	19	17	14	18	34	10	16	20	17	10	19	16	11	23	24	5	12	13	18	18	34	26	27	30	21	20	15	36	18	18	8	8	9	19
MAP3K4_3982	112	69	107	64	122	66	83	62	63	84	76	108	68	99	100	61	76	114	88	128	72	81	97	93	84	77	80	65	190	180	54	43	62	82	46	20	71	58	61	63	87	68	74	96	42	45	22	37	158
MAP4K4_3985	229	197	402	373	336	276	198	185	264	298	289	262	329	348	254	241	195	251	295	297	387	328	310	295	219	264	349	279	498	551	273	297	363	405	294	384	255	213	238	206	383	319	348	335	475	451	336	423	272
MAP7_3988	33	27	134	154	69	81	86	99	128	156	91	104	116	99	66	60	41	23	46	53	13	13	11	29	22	11	75	55	21	25	41	42	13	27	29	33	27	37	20	37	57	60	34	14	36	36	15	16	63
MAPK1_3989	35	35	54	30	46	39	24	31	34	58	43	49	38	33	23	24	29	32	58	40	27	40	42	42	22	25	46	50	38	29	30	48	23	35	30	23	32	16	26	34	43	34	29	38	47	36	38	32	49
MAPK1_3990	14	15	20	23	26	23	15	10	18	29	27	35	10	11	20	9	7	22	8	43	19	21	30	29	16	23	21	9	36	21	24	15	23	28	17	19	17	10	17	15	21	30	19	24	33	11	18	10	24
MAPK13_3996	3	2	7	7	3	5	3	7	5	0	1	1	5	5	2	0	1	1	3	1	4	0	1	0	4	3	6	2	7	7	0	6	2	2	0	4	0	3	3	2	3	3	3	1	0	0	0	2	2
MAPK14_4000	219	170	231	281	267	277	215	230	238	278	234	235	229	188	191	181	209	185	225	155	197	238	299	326	214	177	221	204	282	332	181	136	136	178	106	164	181	173	148	171	201	226	195	211	165	141	101	119	278
MAPK1IP1L_4001	8	13	6	14	9	15	11	15	9	15	8	10	12	12	6	5	18	7	7	5	8	12	13	15	8	6	8	5	15	16	9	4	10	3	8	10	7	10	11	8	14	12	6	10	9	8	3	1	19
MAPK3_4002	36	14	27	57	44	47	36	33	42	32	69	69	46	28	40	25	33	33	72	50	50	20	31	18	31	19	15	37	35	59	35	38	31	27	22	28	23	14	16	11	31	45	27	39	33	50	14	33	47
MAPK9_4009	517	446	553	688	493	587	393	402	602	666	468	455	472	470	423	434	459	429	438	511	397	483	531	602	438	344	623	492	556	607	435	362	385	445	277	372	302	306	300	340	590	439	467	315	403	426	303	341	770
MAPKAPK2_4012	1418	1527	1618	1915	1443	1568	1152	1078	1581	1750	1284	1270	1428	1317	1233	1079	1472	1261	1338	1250	1644	1695	1887	2036	1536	1333	1849	1687	1750	2048	1376	1480	1319	1469	1604	1840	1463	1549	1358	1204	1849	1752	1802	1556	1714	1598	1196	1386	1998
MAPKAPK3_4013	10	12	25	24	11	12	7	6	8	7	19	20	16	8	21	6	11	15	12	23	0	14	12	5	10	7	4	11	13	26	10	9	4	4	7	8	5	3	6	6	8	7	33	25	17	11	6	4	17
MAPKAPK5_4016	16	27	40	39	24	50	30	23	25	33	43	41	20	35	19	21	27	20	47	30	37	27	30	26	30	23	33	38	40	53	21	33	38	31	13	20	23	19	18	17	27	34	69	52	30	26	18	20	40
MAPT_4019	1	1	0	4	0	1	5	3	2	1	1	2	2	2	0	0	1	2	0	0	1	1	0	2	0	3	2	2	0	4	1	0	2	1	2	2	1	0	1	0	1	1	2	3	3	1	0	3	6
MARCKS_4021	452	355	685	620	523	608	382	347	546	511	362	321	420	448	338	380	480	500	419	467	501	487	544	609	447	339	382	293	743	699	456	453	485	550	1096	1348	957	806	705	587	656	449	329	272	619	577	528	631	503
MAST2_4033	34	31	30	35	43	32	23	7	32	32	44	34	38	39	25	27	32	30	33	36	33	29	19	53	24	36	25	18	63	50	34	26	20	34	18	20	19	19	22	24	39	18	55	62	31	32	21	19	47
MBNL1_4056	1207	1089	1455	1294	1449	1533	774	844	1336	1330	999	1064	929	866	905	931	1002	948	830	1011	1647	1689	1761	1810	1131	1221	1559	1276	1353	1302	899	849	1269	1479	1367	1656	1309	1382	1177	1065	1258	1103	1458	1474	805	688	835	875	1506
MBNL2_4059	1493	1379	1879	1852	2132	2034	1447	1364	1993	2223	1567	1779	1653	1432	1379	1224	1558	1381	1252	1281	2287	2286	2888	3097	2038	2017	4723	3703	1840	2023	2718	2623	2387	2487	1444	1726	1888	1946	1746	1766	3784	3784	2110	1867	2645	2532	1472	1615	2238
MBOAT7_4061	4	6	5	10	8	9	5	3	12	10	8	10	8	6	1	5	3	6	7	6	10	7	14	9	3	8	7	7	4	11	15	5	7	4	4	4	2	8	8	2	6	5	5	5	5	4	3	3	4
MCL1_4068	13	13	71	29	53	42	24	25	52	35	24	37	42	50	32	21	22	19	12	20	50	64	56	54	36	36	56	51	25	25	51	40	57	62	62	65	52	50	58	43	68	61	32	28	65	55	46	43	32
MCM10_4071	302	245	301	323	303	280	125	118	153	159	121	152	97	104	180	206	225	259	305	285	707	705	505	553	265	272	161	135	361	428	93	131	398	445	155	158	218	217	246	189	182	164	78	88	101	84	112	114	436
MCM3_4072	1741	1684	1963	2130	1900	2131	806	930	1020	1188	977	1033	733	700	1437	1460	1597	1378	1566	1758	5368	5012	3348	3778	1924	1666	1057	863	2138	2182	737	767	2490	2840	1886	1983	2201	2629	1997	1837	1033	1075	887	748	734	690	1005	1143	2457
MCM4_4075	223	190	294	247	377	362	145	143	128	172	204	190	171	146	201	191	207	292	306	333	547	524	515	528	305	296	241	157	366	384	161	118	361	450	159	192	247	219	246	244	175	173	103	117	184	177	119	167	320
MCM7_4079	652	566	819	688	824	1002	372	306	411	488	475	465	305	338	500	488	620	616	596	662	1793	1618	1639	1812	945	975	496	387	1120	1031	354	335	972	1090	617	718	852	748	778	775	477	505	432	468	369	359	381	451	856
MCOLN1_4080	63	68	65	91	64	54	58	50	74	74	39	72	52	52	63	63	54	52	63	47	48	49	95	80	40	53	38	25	85	59	49	33	44	40	38	33	35	37	38	43	39	48	26	29	40	45	25	27	75
MCUR1_4086	161	184	247	280	279	220	148	141	230	232	214	231	260	198	169	180	172	212	262	245	262	303	213	242	205	176	362	235	217	295	218	225	267	282	227	309	219	167	195	167	241	232	309	262	253	247	227	238	246
MDH1_4087	377	412	503	481	440	545	272	282	412	398	283	355	196	258	280	286	430	365	203	315	337	293	403	449	314	274	387	374	330	278	242	250	200	224	274	245	287	315	258	241	381	338	243	232	248	224	149	210	503
ME2_4100	100	83	204	160	180	183	86	104	92	119	123	115	115	111	114	91	74	121	100	124	140	126	126	143	105	84	147	98	126	155	100	114	144	134	91	130	126	91	107	90	122	106	140	126	106	79	86	118	145
MED1_4106	990	926	1121	1091	1009	1058	663	745	977	1086	788	826	830	793	839	800	885	727	785	861	1050	1057	1195	1211	911	908	1167	935	1139	1145	761	714	799	916	994	1077	970	1044	911	802	976	1107	1255	1247	750	828	762	780	1312
MED21_4109	223	165	343	324	290	334	198	198	293	342	221	228	276	218	188	201	218	183	244	225	236	205	293	307	182	192	278	217	250	327	169	204	152	187	150	216	199	176	174	141	317	266	188	203	253	222	157	166	313
MEF2C_4112	0	0	0	0	0	0	0	0	0	0	0	0	0	0	0	0	0	0	0	0	0	0	0	0	0	0	1	3	0	0	0	0	0	0	0	0	0	0	0	0	0	0	0	1	0	0	0	0	0
MEFV_4116	3	0	7	2	0	4	1	3	3	5	4	0	2	0	1	2	1	0	0	3	14	14	17	32	38	32	1	5	5	1	7	3	13	6	305	349	288	310	290	260	6	13	1	1	17	33	71	81	1
MELK_4117	48	41	92	76	101	111	46	46	50	39	64	51	35	45	67	59	47	85	45	57	174	160	191	183	156	134	44	49	130	111	34	48	103	150	77	107	97	95	110	113	56	43	54	63	63	44	68	106	91
MEST_4122	23	22	33	46	30	37	21	16	22	17	30	27	31	25	37	29	26	23	42	36	39	53	57	42	33	41	40	34	37	47	37	27	47	60	49	66	68	50	61	52	32	33	8	14	32	26	21	49	59
MET_4125	12	10	14	15	25	25	13	10	12	12	11	6	34	16	23	17	7	6	8	16	36	31	28	34	24	16	12	10	18	16	22	26	9	24	29	40	34	35	41	36	26	33	47	37	54	49	22	28	12
METRN_4129	382	389	609	617	467	476	375	354	539	521	607	563	481	448	318	319	437	387	577	536	225	230	242	229	135	140	487	384	287	306	337	380	335	359	133	198	119	87	118	87	465	435	212	195	445	384	195	218	538
METTL2A_4134	7	8	6	8	7	5	3	4	2	6	5	5	3	8	7	8	6	5	10	9	9	2	6	8	5	0	1	6	6	4	5	6	8	10	5	4	4	1	5	3	6	7	4	6	9	2	1	3	7
MIF_4173	281	287	407	386	420	396	257	239	331	374	391	349	295	291	235	226	271	289	371	347	279	254	387	462	374	283	367	270	452	513	253	251	260	307	231	273	394	338	425	351	355	291	385	406	299	264	189	228	376
MKNK1_4185	19	13	21	20	24	24	11	16	21	11	17	15	10	18	12	11	18	10	17	16	14	28	17	21	19	21	15	19	15	24	10	13	26	24	19	33	25	18	17	15	18	27	22	12	25	17	19	18	20
MLEC_4188	71	51	94	94	121	103	65	72	60	85	102	89	60	70	78	57	72	73	61	89	111	103	96	107	58	52	103	79	98	88	94	57	89	113	40	59	57	58	50	35	105	66	37	38	96	55	58	68	80
MLLT11_4193	1748	1599	1755	1925	1900	1965	1101	1205	1987	2158	1675	1715	1607	1344	1175	1172	1437	1357	1730	1707	827	805	1135	1199	1052	923	2023	1751	1728	1850	1389	1319	850	981	373	383	587	580	819	747	2058	2262	1406	1165	1418	1246	470	556	2300
MMP1_4206	9	2	5	12	15	13	5	12	17	5	6	3	13	6	9	9	7	3	12	8	20	29	40	30	16	16	15	11	9	16	8	3	19	23	8	19	36	44	31	47	5	7	26	28	7	12	14	7	13
MMP2_4213	18	15	12	15	15	13	4	10	9	21	7	11	2	1	6	4	19	16	22	8	6	8	15	21	6	11	3	1	41	39	1	1	3	2	2	1	7	9	4	4	1	5	19	12	0	1	2	1	31
MMP3_4216	4	2	4	0	0	3	2	1	2	2	4	3	2	2	3	1	4	4	7	4	13	16	4	15	7	9	4	7	6	10	6	11	13	11	1	1	9	14	30	26	6	2	1	5	2	2	6	5	2
MNAT1_4225	368	339	352	399	347	365	233	241	404	437	332	337	299	257	298	287	357	307	355	309	367	380	447	489	293	304	382	384	360	415	372	423	335	380	341	439	349	411	352	350	346	333	405	343	404	340	279	343	461
MOK_4238	154	127	330	358	220	258	180	170	225	323	205	227	155	142	176	153	166	125	121	153	149	142	146	140	108	76	265	181	95	99	126	153	139	156	79	108	70	93	48	53	198	156	77	68	104	115	85	75	153
MORF4L1_4240	69	91	109	108	109	103	80	70	88	113	119	125	99	105	74	105	72	81	124	94	73	81	59	79	48	66	127	100	98	153	87	96	77	89	39	59	69	63	65	68	95	94	79	70	110	110	81	69	100
MPC2_4243	347	316	375	438	432	399	286	280	403	355	322	355	298	245	269	265	346	304	334	292	277	272	275	347	253	221	290	202	315	328	247	241	209	247	249	254	257	267	224	223	344	323	277	255	315	272	195	228	466
MRE11_4256	474	488	572	643	544	593	337	320	404	452	284	305	300	326	403	429	440	422	445	490	762	824	802	893	549	520	389	317	565	505	266	252	434	485	343	339	377	458	396	365	390	421	294	247	222	229	225	213	640
MRPL12_4260	491	431	503	498	529	588	263	236	380	379	383	406	314	317	336	305	454	471	445	511	457	403	517	506	322	320	448	358	586	503	310	339	399	418	308	298	327	331	289	253	388	375	523	519	394	308	272	253	662
MRPL13_4261	743	689	888	961	909	1048	600	550	737	911	521	625	568	494	626	660	664	687	545	598	570	634	851	828	528	549	722	660	684	692	460	414	443	528	453	536	507	614	530	497	675	667	613	596	487	397	407	498	915
MRPL15_4264	538	498	603	716	721	686	389	355	494	564	470	572	532	476	464	480	537	480	501	567	422	411	443	469	333	321	651	523	520	649	431	395	375	469	306	311	356	339	345	321	568	494	676	683	455	460	298	324	725
MRPL19_4268	65	46	64	71	85	67	52	41	51	76	75	59	64	48	63	38	60	58	101	66	51	62	51	58	56	36	85	78	94	118	57	52	56	63	17	34	48	36	45	41	71	45	83	54	71	45	32	37	83
MRPL37_4278	89	95	105	141	134	142	61	62	97	98	75	86	110	92	85	74	86	88	101	134	114	104	114	128	70	81	91	77	141	135	70	56	82	78	68	83	82	93	78	92	96	70	98	82	77	80	64	79	119
MRPL53_4285	1	5	4	2	2	1	1	0	3	4	8	1	2	0	5	4	1	1	2	0	0	2	0	1	0	1	4	6	3	1	1	5	5	4	2	4	5	1	2	3	3	4	1	1	4	1	1	2	1
MRPS17_4291	263	200	316	282	294	281	172	144	199	242	271	263	213	176	205	146	223	236	210	247	217	247	292	269	212	202	306	204	309	316	175	191	200	244	174	182	241	174	190	188	248	177	311	258	178	158	156	170	335
MRPS2_4292	4	8	3	10	3	7	1	9	4	6	4	4	7	5	3	1	4	5	10	1	13	11	12	5	6	9	3	1	2	9	15	11	6	8	1	5	10	8	7	4	3	5	8	10	7	12	5	0	12
MRPS23_4296	4	1	6	8	13	7	6	3	6	11	9	10	10	4	7	2	12	4	6	6	6	2	0	10	4	11	4	10	10	8	8	5	7	10	4	4	5	2	5	1	9	6	15	7	19	5	0	3	7
MSH6_4310	264	214	304	329	283	320	142	173	230	260	201	181	179	158	167	190	227	172	210	296	499	529	439	479	237	223	243	189	355	295	186	172	374	377	257	273	321	311	228	228	241	218	165	158	180	173	154	182	313
MSMO1_4315	2565	2372	3506	3887	3746	3796	2160	2096	2151	2334	2566	2769	1768	1561	1960	1968	1896	1706	1710	1877	2713	2979	2611	2981	1649	1441	2000	1863	1680	1824	1313	1355	1747	2147	2651	3077	3291	3432	2712	2536	1932	1844	987	839	1437	1228	1287	1435	3317
MSRA_4319	24	14	31	26	16	11	22	16	40	42	38	21	40	24	15	16	27	24	50	43	9	6	3	9	6	2	30	18	14	17	18	16	1	9	2	4	1	0	2	3	30	21	7	11	14	11	3	2	23
MT1E_4328	5	6	10	11	10	8	10	8	2	5	6	4	4	3	3	8	7	5	5	6	8	13	12	23	28	18	1	7	6	6	5	3	1	6	6	7	27	20	63	57	0	6	18	8	0	5	2	1	13
MT1H_4330	0	0	0	3	1	0	0	2	1	0	0	1	0	0	0	0	0	0	0	1	1	0	0	1	0	3	0	0	0	0	0	0	2	1	0	1	3	2	1	2	0	1	0	1	0	0	1	0	2
MT1HL1_4331	1	0	0	0	0	0	0	2	1	0	0	0	0	0	0	0	1	0	0	0	0	0	0	0	0	2	0	0	0	0	1	0	0	0	0	1	0	0	2	0	0	0	0	0	0	0	0	0	0
MT1X_4333	5	0	1	3	13	4	9	6	3	5	0	7	3	5	1	2	0	1	3	1	9	4	18	10	10	13	3	2	1	1	3	1	1	4	1	6	9	8	16	21	4	1	3	3	5	4	2	6	5
MT2A_4334	35	33	266	309	330	322	251	207	62	53	184	189	91	95	137	144	60	80	82	56	957	805	1281	1404	949	1002	56	49	110	131	139	153	539	566	880	1045	1728	1159	1788	1587	93	63	216	194	179	149	350	427	67
MT3_4335	0	0	1	0	0	0	0	0	0	0	0	0	0	0	0	0	0	0	1	0	0	0	0	0	0	0	0	0	0	0	0	0	0	0	0	0	0	0	0	1	0	1	0	0	0	0	1	0	1
MTA1_4336	422	447	561	638	539	491	308	324	519	560	367	392	410	395	396	371	463	407	493	536	407	340	450	465	337	337	390	346	505	588	367	364	350	406	265	319	277	256	279	283	479	421	470	416	404	368	225	273	560
MTERF3_4338	74	75	91	124	140	114	79	63	98	134	86	121	104	95	72	86	77	81	97	108	106	112	146	149	85	97	121	82	133	149	76	102	115	115	58	91	94	72	104	80	98	65	127	102	89	67	43	65	154
MTF2_4342	136	107	192	224	232	190	134	153	144	166	162	157	149	142	175	157	152	141	188	135	246	224	312	271	205	175	119	107	218	257	125	122	249	239	129	148	194	136	202	211	106	116	185	207	133	112	115	113	165
MTFR1_4345	183	151	202	205	191	208	134	110	171	178	160	187	165	105	126	105	176	158	185	129	105	98	121	120	90	99	212	136	208	244	84	128	115	138	55	74	88	78	91	71	174	143	156	182	110	100	89	71	263
MTHFD1_4346	189	152	298	260	341	304	140	111	132	130	187	162	147	139	192	167	150	191	168	202	308	293	335	379	214	197	187	96	237	244	121	122	207	251	199	230	310	274	301	276	195	158	171	211	152	136	137	148	266
MTMR2_4353	35	33	45	35	39	45	15	22	26	38	30	21	27	28	27	48	26	31	30	30	26	25	34	18	20	22	45	41	45	68	30	38	26	29	14	24	15	13	13	23	35	32	38	43	27	22	16	32	45
MUC1_4366	13	9	28	48	38	16	24	36	21	14	21	17	27	20	26	15	19	19	30	6	21	15	22	16	11	34	13	27	18	41	21	34	15	21	70	101	117	71	70	79	28	26	26	11	26	51	44	65	9
MX1_4382	48	34	384	425	481	430	315	297	84	96	341	272	195	119	227	216	98	122	105	76	2766	2204	3193	3669	2208	2344	16	35	172	261	267	312	1342	1458	2013	2445	3756	2802	2460	2332	88	94	653	470	422	445	1173	1242	81
MYB_4387	1	1	0	2	2	0	1	0	0	0	0	1	0	0	1	4	0	0	0	1	4	7	7	3	0	1	3	1	1	1	7	0	5	1	3	1	3	3	1	5	10	1	1	0	2	3	2	3	4
MYBL2_4391	98	81	90	117	123	147	54	53	51	61	51	49	61	52	79	72	104	101	86	92	159	178	209	189	100	102	51	35	180	165	34	58	88	105	56	88	100	77	65	79	73	77	43	29	78	46	37	58	143
MYC_4394	798	786	574	647	1039	1039	321	327	779	960	620	605	532	514	402	421	565	596	574	555	1002	944	1314	1281	638	560	1441	1143	1080	1219	1045	1125	1296	1451	550	585	1007	930	601	519	935	968	2939	2763	768	699	616	643	1072
MYCBP_4395	2	0	0	8	3	1	2	2	0	0	2	2	1	1	2	0	1	0	0	4	1	0	4	1	0	0	2	2	5	3	0	1	3	5	0	2	1	1	0	2	0	0	2	0	2	0	0	0	2
MYL12A_4405	0	1	5	2	3	5	4	1	2	3	5	2	7	4	0	4	2	4	4	3	9	0	2	4	0	1	4	6	1	4	0	1	0	8	1	3	1	2	3	1	0	2	5	0	2	2	1	0	1
MYL9_4413	2021	2054	2315	2522	2017	2032	1242	1300	1959	1888	1031	1013	1536	1181	1445	1440	1855	1693	1851	1710	1540	1529	1157	1264	679	713	1576	1286	1814	2038	1188	1303	1354	1472	1491	1526	1157	1179	675	681	1921	2057	1038	945	1409	1284	1066	1171	2593
MYLK_4414	326	325	209	248	180	168	74	75	195	201	93	97	169	134	140	193	230	237	213	301	205	163	193	189	151	145	373	290	281	262	182	174	174	234	123	150	154	127	157	145	281	260	125	122	113	123	122	140	452
CIAO3_4450	17	17	16	15	20	25	10	9	16	14	26	24	35	11	15	11	18	9	30	12	7	6	13	9	10	17	9	8	14	38	15	7	14	20	10	8	18	11	9	8	9	21	23	12	21	10	17	9	23
NAT1_4454	0	1	1	0	1	3	1	2	0	4	2	7	4	1	0	1	0	0	0	0	2	4	5	2	3	2	5	0	2	2	2	2	2	2	4	1	2	2	1	2	5	2	2	0	0	1	0	5	3
NAT2_4457	0	0	2	0	0	0	0	0	0	1	0	1	1	1	2	0	1	0	0	2	0	0	0	0	0	1	1	0	0	0	0	1	0	2	0	0	0	1	3	1	0	1	0	0	3	0	1	0	3
NCAPD2_4474	206	160	193	173	240	254	143	140	111	106	159	168	129	124	116	125	194	146	167	178	122	130	294	284	242	248	118	96	263	306	76	83	76	107	71	85	125	119	162	111	157	112	126	146	84	79	55	62	277
NCAPG_4478	898	872	899	1024	1350	1354	592	678	588	640	540	574	492	418	643	683	800	745	618	690	1096	1206	1797	1889	1351	1243	617	568	1050	1062	334	344	549	628	382	502	690	767	814	764	657	601	685	620	423	355	324	380	1296
NCAPG2_4481	5	1	3	6	4	14	6	2	1	6	4	4	0	2	5	4	6	8	2	4	5	11	10	18	7	13	4	2	8	5	1	4	6	8	0	6	9	4	6	5	5	3	3	6	2	6	10	5	4
NCAPH_4484	101	91	126	70	163	151	53	50	65	70	61	63	59	57	80	62	75	110	77	94	131	137	157	214	177	176	79	28	134	103	47	44	85	90	45	57	76	70	101	127	65	50	34	64	58	43	47	47	132
NCBP1_4487	325	301	366	387	402	409	255	260	298	307	297	285	275	186	263	234	359	257	314	326	290	356	401	418	254	255	316	295	433	418	212	208	262	293	166	244	283	241	251	228	330	272	322	342	232	222	178	189	485
NCK1_4491	257	180	270	249	279	228	169	121	272	268	228	252	180	191	162	147	195	193	154	250	260	277	339	336	278	334	459	282	302	333	218	226	240	286	201	234	201	226	300	258	240	238	332	416	185	151	167	160	309
NCK2_4492	2	4	11	4	3	7	4	7	4	7	2	2	2	8	4	2	2	3	3	6	8	4	11	5	5	7	0	1	3	4	8	4	10	7	6	20	7	5	4	3	4	1	5	2	11	6	9	9	4
NCOA3_4501	27	30	31	40	31	46	33	28	34	42	24	39	40	33	28	22	14	18	44	33	38	33	61	45	29	52	40	30	49	67	43	45	54	64	54	52	58	41	55	39	38	50	56	45	55	39	44	42	32
MT-ND6_4508	11040	10751	15019	18675	15917	16840	9399	10137	14488	14324	9488	9533	9490	9271	10986	10344	11857	11123	11629	11367	15487	14804	16448	17723	10699	10431	10307	9017	13403	14930	8074	8110	10310	11308	12224	12190	10801	13120	7966	7854	13711	16576	10960	9644	9109	8779	7770	8386	16000
NDRG1_4510	5	0	3	2	1	1	0	0	0	6	4	0	2	3	0	2	5	3	2	0	0	0	3	2	2	1	2	5	0	2	4	2	3	1	1	7	4	3	8	2	2	0	3	1	1	1	3	0	1
NDUFA1_4514	740	584	1083	967	1052	1147	703	582	862	935	843	888	656	755	666	720	754	754	572	809	725	620	778	819	583	621	1110	692	856	692	628	578	651	731	626	777	567	590	600	627	884	776	478	650	816	623	570	594	1017
NDUFA13_4515	134	129	163	257	172	144	122	134	160	180	259	211	234	132	113	129	109	134	359	162	125	109	114	147	95	92	191	212	189	340	118	198	118	144	84	112	108	71	90	106	208	189	260	154	185	155	92	103	192
NDUFV2_4530	209	193	292	286	317	302	193	165	193	217	268	267	214	257	171	175	206	193	325	226	208	175	234	260	206	191	312	204	246	372	193	197	241	273	161	204	223	158	173	180	251	206	269	251	281	222	215	200	249
NEFL_4536	4	3	1	7	8	2	9	0	12	8	4	2	2	3	2	2	3	2	3	4	0	0	0	1	2	0	7	3	1	2	0	5	6	1	1	1	0	0	0	1	3	4	3	3	7	0	5	2	9
NENF_4541	49	49	58	83	66	50	36	35	60	61	62	75	83	65	54	36	42	53	67	67	40	35	50	40	46	49	58	61	50	73	52	51	64	51	41	47	43	26	45	30	55	62	54	36	61	39	35	49	53
NES_4542	53	55	62	84	50	54	35	62	44	59	54	45	89	56	44	31	75	55	152	85	83	48	78	76	44	41	43	40	123	214	64	79	62	79	37	32	53	22	24	22	77	82	54	34	104	93	37	41	76
NEUROG2_4551	0	0	0	1	0	0	0	0	0	0	1	0	0	0	0	0	0	0	0	0	0	0	0	0	0	0	0	0	0	0	0	0	0	0	0	0	0	0	0	0	0	0	0	0	0	0	0	0	0
NFATC3_4560	215	219	221	282	304	278	201	186	231	270	216	240	149	184	191	198	225	230	241	211	288	297	392	387	286	288	167	174	328	299	159	144	264	262	125	158	200	217	210	194	207	199	209	231	141	96	117	113	319
NFATC4_4563	76	65	90	118	83	50	72	75	96	98	86	92	74	75	62	61	82	81	88	100	55	52	68	64	46	59	50	33	109	99	58	51	48	45	74	76	31	32	48	54	81	70	49	48	46	59	25	47	97
NFE2L2_4564	2321	2326	3894	4457	3454	3840	2543	2734	4057	4055	2366	2758	2660	2392	2730	2694	2650	2158	2008	2301	3079	3407	3509	3650	2404	2396	6079	5029	2063	2310	3297	3160	2498	2881	3997	4465	2848	3428	2610	2317	5364	5794	3650	3414	3600	3331	2914	3238	3147
NFIL3_4565	43	49	72	96	78	66	58	50	118	139	44	42	71	65	69	74	61	37	46	53	64	69	82	87	61	61	79	84	44	55	35	43	34	32	63	68	68	78	71	68	104	98	244	192	48	53	54	39	66
NFKB1_4566	200	190	199	192	207	219	156	108	190	223	157	208	171	157	211	165	235	228	206	224	875	929	904	967	657	725	3220	2697	600	681	1528	1631	891	983	1151	1288	913	854	802	791	2375	2366	578	503	2152	1882	1248	1287	255
NFKB2_4567	16	30	18	35	23	28	5	21	27	31	20	30	31	35	26	29	19	32	45	30	237	222	245	267	189	179	108	112	114	155	274	295	217	212	346	476	382	306	303	278	153	169	189	107	299	317	218	246	45
NFKBIA_4568	9	14	20	23	21	14	19	6	21	18	25	17	15	16	13	13	23	22	37	38	163	122	155	155	133	146	249	184	101	145	174	183	167	208	208	276	177	115	187	156	283	232	84	61	232	238	200	217	22
NFKBIE_4571	12	11	10	9	12	17	11	5	19	16	13	6	17	14	9	10	23	10	5	9	194	159	154	145	124	136	255	200	70	57	182	148	173	181	307	446	225	169	174	172	226	186	69	66	254	180	279	253	14
NGB_4579	0	0	0	0	0	0	0	0	1	0	0	0	0	0	0	0	0	0	0	0	0	0	0	0	0	0	0	1	0	0	0	0	0	1	0	0	0	0	0	0	0	0	0	0	1	0	0	0	0
NHP2_4585	197	181	258	297	262	264	109	142	179	219	167	184	193	127	130	144	182	164	279	232	193	170	200	221	146	119	151	205	224	308	136	163	164	176	94	156	154	128	128	115	176	188	292	209	206	150	112	134	247
NIPSNAP1_4593	5	1	4	3	4	4	8	3	4	7	3	13	9	6	3	2	6	2	8	3	1	3	2	5	0	4	0	0	2	14	3	5	6	3	5	1	1	4	1	1	8	1	1	5	5	5	2	3	5
NISCH_4595	37	46	52	57	55	40	33	36	46	48	60	45	57	46	35	27	52	37	76	49	32	34	30	36	42	44	35	39	53	71	24	40	21	47	17	19	23	25	25	28	46	52	77	44	29	42	14	15	54
NISCH_4596	113	114	153	134	109	115	94	111	140	176	139	150	119	107	112	81	124	128	132	133	99	107	94	107	93	80	117	97	132	150	113	124	85	114	37	54	72	45	61	66	154	112	112	106	100	144	47	67	161
NISCH_4597	157	133	181	207	169	171	126	106	213	214	193	236	188	179	155	109	164	157	190	168	106	111	127	145	156	110	208	127	193	247	141	149	101	145	49	55	62	48	75	90	183	145	143	165	158	139	72	78	220
NIT1_4598	314	263	445	496	378	427	276	315	435	485	278	389	323	271	278	272	340	269	334	343	152	172	195	250	180	153	293	295	300	306	219	193	139	149	161	160	149	146	130	141	405	421	283	211	226	291	132	143	380
NME1_4611	1012	947	1047	1153	1322	1391	667	650	704	873	787	799	823	774	811	762	866	885	1085	971	1131	1101	1287	1359	822	767	873	792	1231	1496	604	714	933	1079	639	824	935	742	707	580	866	890	1075	985	772	741	605	755	1412
NMT1_4614	99	82	180	152	144	174	127	112	112	118	138	165	138	113	123	116	113	87	132	125	128	110	177	193	109	130	86	31	117	167	57	71	96	116	114	105	157	157	151	141	105	93	144	106	96	103	110	112	120
NNT_4618	516	515	732	976	637	738	448	527	658	836	462	536	535	405	451	512	531	446	472	428	484	560	474	642	396	335	645	600	476	565	401	342	377	414	374	454	351	421	305	306	702	545	437	334	369	351	324	331	690
NOC3L_4620	154	133	147	274	182	167	134	96	123	145	105	114	138	97	116	139	149	138	200	134	312	340	338	312	221	190	229	281	162	246	212	255	263	343	380	517	424	430	278	279	199	197	439	217	189	207	251	395	226
NOL3_4625	36	37	59	38	30	23	34	34	43	54	38	45	46	41	24	29	46	37	32	17	21	20	35	35	41	31	19	24	42	44	31	11	19	22	31	31	48	46	60	69	30	40	45	57	28	30	18	23	45
NOLC1_4626	860	847	932	1097	979	1121	538	493	867	1003	562	635	584	559	701	724	823	715	623	856	1380	1439	1144	1252	683	672	1105	917	911	903	753	737	1006	1191	835	884	770	940	628	583	943	1018	1206	1099	634	606	700	727	1109
NOS1_4636	1	0	0	0	0	0	0	0	2	0	0	0	0	0	3	0	0	0	0	1	0	0	0	1	0	0	1	0	0	0	0	1	2	0	0	0	1	1	0	0	1	0	1	1	0	0	0	0	0
NOS2_4637	0	0	0	0	0	0	0	0	0	0	0	1	0	0	0	0	0	0	0	0	0	0	0	0	0	0	0	0	0	0	0	0	0	0	0	0	0	0	0	0	0	1	0	0	0	0	0	0	0
NOS3_4638	0	0	0	0	0	0	0	0	0	0	0	0	0	0	0	0	0	0	0	0	0	0	0	0	0	0	0	0	0	0	0	0	0	0	0	0	0	0	0	0	0	0	0	0	1	0	0	0	0
NOSIP_4639	94	123	133	230	132	165	88	110	112	108	135	121	164	83	83	55	114	116	279	99	143	85	132	128	107	105	87	192	123	361	64	141	90	120	75	88	164	101	87	71	93	135	285	114	71	106	73	71	171
NPC1_4646	441	410	542	667	531	555	353	424	500	644	363	390	425	349	427	391	447	343	348	372	539	524	529	643	402	404	489	393	417	434	340	303	373	420	466	479	411	485	385	372	493	444	500	451	406	350	365	389	636
NPDC1_4650	186	225	417	476	360	360	285	315	346	369	411	378	436	331	318	279	218	208	369	302	259	191	195	264	178	205	116	107	299	391	204	219	219	297	280	323	356	284	319	280	307	288	313	249	297	301	203	223	285
NPEPL1_4651	21	34	84	80	52	39	27	31	52	50	34	44	40	36	38	40	31	35	44	42	42	26	29	51	31	22	29	25	30	30	31	23	33	39	38	40	30	33	26	33	42	25	15	22	48	27	21	26	30
NPRL2_4660	167	191	216	254	201	212	171	184	215	204	221	208	196	153	184	151	203	153	173	174	128	116	154	169	154	128	200	176	202	199	110	137	118	129	90	83	162	129	138	120	198	183	172	146	115	109	90	75	242
NQO1_4668	243	190	214	297	292	339	171	193	189	247	209	297	194	169	178	185	211	204	269	271	177	156	269	336	197	196	180	148	226	305	193	172	177	198	105	110	187	209	223	178	215	158	520	417	224	164	141	136	314
NR1H2_4670	162	122	249	226	226	200	144	139	212	169	184	206	195	154	157	162	151	145	163	155	221	165	177	178	142	146	157	134	170	211	143	131	138	160	191	242	186	157	180	182	180	214	227	215	178	163	148	169	189
NR1I2_4673	0	0	2	1	1	0	2	2	2	0	0	0	1	0	0	1	2	2	0	3	0	0	0	1	0	0	0	1	0	0	2	0	1	0	0	1	0	0	0	0	1	6	0	0	1	2	0	2	0
NR2F6_4684	3	2	7	6	4	7	5	0	5	6	5	7	2	4	2	6	6	6	9	9	2	2	4	1	4	8	1	5	7	13	3	2	5	5	2	0	1	1	4	5	3	2	4	2	2	2	1	1	4
NR3C1_4689	219	172	290	298	311	286	210	206	250	277	268	284	249	205	182	187	255	261	252	257	478	403	514	554	435	537	818	658	451	466	652	627	435	370	449	591	412	353	476	405	548	452	369	393	545	499	432	386	313
NRAS_4703	661	568	769	807	773	833	412	435	686	843	486	550	547	575	532	578	573	613	392	611	653	798	760	818	517	517	921	712	858	808	741	676	662	847	674	813	533	588	462	470	925	741	631	671	848	727	723	762	812
NRCAM_4705	2374	2420	3622	3809	3076	3004	2504	2524	3685	3964	2820	2915	3231	2804	2527	2485	2924	2468	3293	3135	4811	4538	3782	4300	3050	2964	3839	3364	3412	4062	3327	3114	3601	3994	2362	2669	2677	2668	2730	2452	3377	3380	4938	4199	3093	2751	2285	2227	3313
NRIP1_4719	152	94	215	201	202	164	152	105	196	218	179	250	127	178	139	117	166	152	194	179	383	366	319	387	265	247	423	250	416	404	242	224	360	375	122	187	148	112	159	145	342	217	201	215	227	171	131	160	196
NRP1_4724	406	398	2988	2946	2164	2103	1545	1626	1361	1471	943	1077	2007	1691	2011	1836	522	521	647	592	573	588	491	562	467	449	655	580	792	919	358	330	344	398	506	587	418	413	492	499	1297	1158	1496	1327	1640	1393	813	955	689
NT5DC2_4737	5	12	2	4	5	3	2	2	5	8	3	1	3	0	4	1	8	6	7	5	1	2	2	1	3	4	6	9	5	5	6	4	1	3	0	3	0	0	0	0	4	10	3	0	8	7	1	1	11
NT5E_4738	884	864	1364	1647	1476	1544	875	865	890	1015	766	810	732	686	783	806	945	855	845	766	2495	2349	2656	3158	1992	1864	791	810	1098	1188	712	732	1324	1487	1752	1948	2794	2754	2429	2205	879	818	2050	1602	761	679	990	1103	1096
NUCB2_4744	86	63	95	127	104	87	79	68	75	116	95	103	82	77	59	85	95	65	83	103	77	60	75	79	62	56	109	65	88	69	88	90	81	74	49	55	54	50	61	47	124	57	41	28	78	82	59	54	126
NUDCD3_4752	54	64	113	117	142	149	82	89	112	124	134	138	76	83	120	93	119	89	122	106	92	121	125	140	101	104	24	29	151	169	72	92	75	131	44	91	107	83	100	85	118	106	150	142	76	69	74	59	122
NUDT21_4757	234	205	296	301	393	339	237	198	231	231	278	242	294	228	204	263	220	227	266	237	289	280	335	349	274	211	338	247	442	470	170	205	245	318	212	284	301	267	260	241	233	169	319	265	187	192	163	217	310
NUDT5_4760	37	34	37	26	31	41	11	16	25	31	11	21	17	9	19	16	33	24	16	21	28	35	33	35	17	14	36	26	21	22	28	12	28	15	19	19	33	34	19	22	27	29	15	13	15	18	16	13	32
NUDT9_4763	489	474	735	786	655	668	471	487	630	789	553	572	554	515	460	439	571	475	519	549	432	510	486	600	404	359	757	584	524	602	362	415	334	386	255	361	294	327	309	337	573	583	376	363	393	350	278	310	735
NUP107_4770	111	107	166	174	133	176	84	79	131	159	90	94	110	96	96	145	103	123	81	146	173	191	224	249	211	159	120	114	190	182	109	79	117	126	124	118	163	139	149	135	142	127	142	146	83	92	75	116	158
NUP133_4773	211	169	282	227	227	243	138	169	209	225	225	268	201	159	168	173	213	209	234	239	178	213	222	263	169	186	247	176	260	288	151	165	139	191	98	140	150	155	168	133	250	221	187	188	197	158	123	122	299
NUP37_4777	16	13	16	5	26	14	8	9	4	18	7	8	11	10	10	7	12	8	7	17	8	14	21	10	17	13	7	2	15	10	3	6	10	13	9	16	20	8	10	9	10	15	6	7	8	9	6	13	9
NUP62_4779	3	11	12	6	11	14	3	7	12	5	6	15	7	2	13	16	4	6	5	7	24	25	27	25	11	11	12	13	12	20	7	8	20	33	16	35	21	16	21	9	5	17	16	6	9	13	18	19	15
NUP85_4781	127	109	126	148	146	158	88	80	96	107	94	98	68	73	123	100	100	118	139	112	190	177	200	225	148	113	89	70	126	124	72	82	102	136	84	108	106	155	121	115	102	86	81	61	65	68	60	82	151
NUP88_4782	231	260	264	305	321	266	136	156	214	261	166	210	185	141	170	169	256	209	196	209	306	335	380	340	208	229	227	209	280	247	171	154	179	236	200	229	218	264	193	178	231	180	351	271	151	118	130	154	344
NUP93_4783	4	3	4	7	7	1	3	5	4	3	11	3	0	4	2	7	1	0	6	4	6	7	4	6	6	5	2	0	10	6	5	9	6	5	2	4	7	2	9	1	1	4	4	7	5	0	7	2	8
NUS1_4786	466	424	636	635	630	586	364	380	557	653	403	441	372	367	453	429	476	499	359	483	578	556	512	509	323	289	532	488	470	442	383	435	500	550	539	603	427	417	377	360	571	541	452	424	448	400	467	511	620
NUSAP1_4789	1828	1804	1703	2005	2545	2891	1426	1590	1298	1316	1078	1214	1030	863	1131	1144	1931	1685	1188	1261	1438	1473	2765	3038	2315	2201	1143	1116	2000	2013	782	774	827	971	582	686	928	1124	1148	1128	1361	1299	864	720	903	799	606	646	2435
OLIG2_4807	0	0	0	0	0	0	1	0	0	0	0	0	1	0	0	0	0	0	0	0	1	0	0	0	0	0	2	0	0	0	0	1	0	0	0	0	1	0	0	0	0	2	0	0	0	0	0	0	0
ONECUT1_4810	0	1	0	0	0	1	0	1	1	1	1	1	0	1	0	0	0	0	0	1	0	0	0	0	0	1	1	1	0	0	0	1	0	0	1	2	0	1	0	0	0	1	0	0	0	0	1	0	1
OPHN1_4811	6	3	11	6	5	2	2	2	6	8	6	6	8	6	1	5	12	13	1	3	5	1	7	10	1	8	8	8	4	7	8	3	3	2	1	5	0	4	2	2	4	6	1	3	3	2	2	2	9
ORC1_4828	23	22	9	15	13	32	8	15	14	20	3	11	7	4	20	8	20	26	24	28	72	78	41	55	18	31	7	0	18	27	12	10	33	46	38	61	47	50	41	63	7	7	10	1	2	14	36	24	35
ORC4_4831	132	111	230	229	223	203	152	123	165	194	227	192	194	184	153	125	125	147	230	194	207	214	211	243	162	187	171	133	212	280	162	200	205	233	112	154	157	107	164	133	181	155	212	202	223	185	158	171	226
ORC6_4832	88	55	65	66	57	69	21	45	32	49	23	39	24	36	48	40	64	50	51	67	218	189	170	187	84	103	49	38	73	71	46	31	129	141	72	87	97	108	92	65	40	24	37	51	36	41	48	71	85
ORM1_4833	0	0	0	0	0	0	1	0	0	0	0	0	0	0	0	0	0	0	0	0	0	0	0	2	0	0	0	1	0	0	1	0	0	0	0	1	0	0	0	0	0	1	0	0	0	0	0	0	0
ORM2_4836	0	0	0	0	0	1	0	1	1	0	0	0	0	1	0	0	0	0	0	0	0	0	0	0	1	0	0	0	0	1	0	0	0	0	1	0	0	0	0	0	0	0	0	0	0	0	0	0	0
ORMDL2_4840	308	242	407	443	396	392	257	219	271	309	313	325	259	245	298	295	234	263	285	298	341	320	370	419	247	210	371	259	334	371	208	222	275	324	266	304	351	243	263	257	379	287	295	316	281	290	228	265	396
OSGIN1_4849	14	8	12	23	3	15	5	9	9	15	13	14	14	10	20	13	17	10	39	18	16	9	15	21	9	8	5	12	6	11	8	20	18	10	15	20	13	12	15	7	12	11	89	30	13	4	5	6	20
OST4_4852	4120	4248	5446	6136	4781	5004	3220	3484	5449	5443	3682	4056	3864	3400	3691	3613	3776	3455	3874	3974	4670	4291	4474	4753	2836	2841	5024	4126	4338	4384	3344	3393	3362	3746	4557	4597	4406	4858	3614	3442	4968	5060	2528	2381	3964	3513	3115	3442	5451
OTX2_4868	0	0	0	0	0	0	0	0	1	2	1	1	0	1	0	0	0	0	1	0	0	0	0	0	0	0	0	0	1	1	0	1	0	0	0	0	0	1	1	0	0	0	0	0	1	0	0	0	0
OXA1L_4873	5	10	21	15	15	15	5	4	10	16	25	19	11	12	4	7	4	15	32	15	8	13	3	17	9	14	15	12	17	13	8	3	12	8	6	6	16	3	7	9	9	5	9	10	13	4	11	5	13
OXCT1_4876	84	81	86	133	79	88	76	65	86	99	48	55	75	53	59	75	81	49	70	77	86	105	88	163	59	80	90	78	91	59	62	35	47	74	66	84	67	99	116	88	61	71	63	73	49	42	38	42	131
OXSR1_4880	105	92	126	93	117	142	62	45	124	147	92	103	87	90	61	86	105	67	51	96	105	109	137	146	92	101	130	99	127	125	90	101	88	93	122	127	134	151	98	114	128	111	110	123	96	94	89	70	148
P2RY14_4885	0	0	0	2	1	0	0	0	0	0	0	0	2	0	0	0	2	0	0	1	0	0	1	0	1	0	0	0	0	0	0	0	0	0	0	0	0	1	0	0	0	0	0	0	0	0	0	0	0
P4HA2_4889	117	89	106	127	95	117	96	99	127	157	148	133	121	128	90	85	146	114	155	131	266	272	342	398	296	301	209	170	272	375	139	145	199	197	163	250	326	262	354	281	178	131	286	250	126	123	86	122	211
P4HB_4890	10	14	5	14	9	14	8	6	6	6	9	9	10	9	6	16	6	6	15	13	4	9	4	10	7	9	9	14	9	14	7	3	5	11	8	5	12	13	14	14	11	9	11	11	10	7	6	13	11
P4HTM_4891	70	65	112	119	94	69	65	76	134	125	94	84	72	81	70	62	86	69	65	87	55	26	44	59	39	36	118	83	48	45	50	60	38	61	25	30	34	23	29	29	82	86	55	58	72	61	36	45	75
PACSIN3_4896	7	5	12	18	5	3	8	10	2	4	5	12	10	13	1	5	8	2	10	1	4	5	7	10	1	5	0	4	5	12	5	3	3	6	6	4	3	1	4	4	5	8	6	4	7	7	0	5	12
PAFAH1B1_4903	533	502	640	760	703	651	471	401	634	712	722	672	681	543	457	480	523	528	733	590	474	451	528	671	463	428	677	571	726	933	517	566	422	503	366	420	429	347	418	433	702	615	652	587	627	583	335	378	800
PAFAH1B3_4904	34	50	30	61	39	42	33	39	42	64	53	34	47	37	29	35	51	25	25	42	26	23	27	38	32	26	50	20	37	50	28	25	22	31	18	11	17	28	12	17	46	31	21	18	41	27	16	17	77
PAIP1_4909	4	4	10	17	9	4	6	2	13	6	7	7	10	15	10	5	3	8	9	12	6	11	8	9	3	8	7	8	4	9	8	6	3	4	3	6	5	13	5	4	8	14	9	8	9	9	3	3	4
PAK1_4912	6	3	5	20	5	5	5	8	9	6	9	0	19	5	5	3	5	4	19	6	1	5	6	2	2	6	2	12	12	19	1	8	5	0	4	2	8	4	1	1	2	4	13	5	2	0	1	3	4
PAK4_4916	0	5	1	1	6	3	1	2	2	2	5	2	0	0	1	0	1	3	1	2	2	0	2	4	2	1	0	0	1	7	4	3	4	2	0	0	0	5	1	5	2	2	0	0	1	3	3	3	1
PAK6_4917	5	2	1	0	2	2	0	2	3	1	6	3	1	4	2	0	8	3	4	7	1	0	0	0	2	1	11	5	7	5	3	0	0	2	0	0	0	3	0	0	7	5	3	3	2	2	0	1	1
TENT4A_4925	52	36	94	103	75	67	60	46	103	98	72	62	75	61	55	50	41	63	67	42	84	83	87	89	74	50	86	49	59	103	59	66	80	92	83	120	76	71	84	61	100	91	70	65	73	89	65	79	84
PARP1_4934	857	710	1200	1183	1211	1174	678	627	900	937	840	857	696	827	728	731	770	848	861	961	1351	1136	1281	1298	883	783	1101	905	1101	1056	643	690	863	1058	648	811	833	733	683	636	963	828	458	475	788	618	580	631	1117
PARP2_4940	34	16	24	40	47	43	12	21	18	34	25	37	24	13	21	16	27	25	25	37	46	33	52	65	38	41	32	13	45	34	12	12	16	31	12	8	9	18	21	21	32	24	24	28	21	10	5	15	46
PAX6_4946	70	55	97	97	71	87	59	44	68	61	106	97	74	82	55	53	80	85	108	109	45	35	34	44	36	37	44	37	66	68	16	25	41	27	36	37	37	15	35	43	33	48	26	42	29	23	17	29	70
PAXIP1_4950	7	8	6	10	8	4	2	4	5	8	7	8	2	5	2	2	5	5	2	12	10	17	16	8	10	3	10	7	11	17	7	9	9	9	10	7	5	5	7	12	4	14	7	9	7	8	5	4	11
PCBD1_4953	0	1	0	4	0	0	0	0	2	2	1	0	3	1	2	1	1	0	5	0	3	2	1	0	0	1	0	0	2	1	2	0	0	0	2	0	2	0	2	0	2	1	3	0	0	3	3	0	0
PCDHA2_4960	20	19	32	43	38	28	21	20	37	50	27	30	30	28	17	29	33	21	20	40	15	17	24	33	8	19	19	5	27	36	13	9	16	22	24	12	18	14	16	16	21	30	24	18	28	20	15	20	30
PCDHA9_4965	6	8	10	8	14	10	10	9	9	15	2	2	2	10	7	5	7	4	7	2	6	3	3	3	3	3	3	5	7	7	7	3	2	2	5	3	3	3	4	3	6	2	6	1	8	2	6	4	14
PCDHAC2_4966	5	9	15	18	9	25	14	8	14	23	18	9	13	14	11	13	14	9	10	9	44	43	26	37	19	14	10	10	17	20	15	10	34	19	19	20	28	31	25	16	2	18	18	19	9	9	10	14	14
PCMT1_4984	541	406	764	733	822	718	491	413	545	613	679	626	647	497	522	477	535	518	685	646	569	608	628	670	527	488	719	607	735	805	519	539	611	666	440	635	526	417	494	445	661	518	398	391	667	569	460	474	724
PCNA_4987	115	102	153	169	220	208	76	91	82	69	99	81	86	73	77	86	79	106	153	139	352	328	313	316	174	149	114	85	169	261	59	78	193	210	81	153	139	124	190	133	80	73	84	69	42	59	65	72	114
PDCD6IP_5007	197	132	289	219	278	258	185	159	225	282	253	218	217	207	156	211	201	189	245	250	208	230	202	240	181	197	349	212	273	271	200	194	191	187	199	225	197	157	204	169	280	214	209	227	223	195	170	204	263
PDGFB_5026	144	123	57	54	79	64	22	19	78	88	44	46	43	44	55	69	83	66	62	55	97	95	141	162	91	82	134	160	104	129	104	117	130	117	57	51	79	78	39	45	101	117	50	52	57	66	66	85	158
PDHX_5033	26	20	26	58	36	39	21	27	35	53	57	35	51	22	26	23	15	17	71	33	39	27	31	29	38	31	37	54	30	67	32	52	41	27	53	65	65	38	32	35	38	41	67	37	34	47	31	32	43
PDIA5_5037	66	76	140	159	92	83	100	82	150	186	124	156	121	122	90	84	83	80	59	86	70	80	58	85	53	68	150	135	102	79	95	87	52	58	63	69	50	61	62	59	115	110	52	57	103	88	64	62	64
PDIA6_5040	3508	3327	5898	6019	5836	5835	3436	3592	4276	4320	3209	3619	3559	3151	3555	3410	3469	3288	3517	3576	5315	4615	5683	6123	4457	4221	3849	2999	4093	4335	2980	2950	3593	4100	5433	5560	6290	5914	5426	5036	4089	4178	2369	2117	3541	3211	3443	3905	4275
PDLIM1_5041	547	467	876	822	789	782	469	444	620	627	668	774	540	522	540	484	569	530	436	529	871	832	869	992	783	781	1021	903	665	629	867	772	786	866	756	878	612	531	645	564	956	801	698	635	926	756	779	848	595
PDS5A_5046	1167	983	1472	1669	1641	1576	1013	907	1174	1417	1127	1197	1187	1027	1127	1158	1162	1115	1122	1244	1302	1379	1586	1643	1109	1085	1633	1274	1509	1590	1145	1022	1093	1385	898	1111	955	1008	949	940	1438	1323	1381	1446	1214	1102	896	977	1593
PECAM1_5057	0	0	0	0	0	0	0	0	1	0	0	0	0	0	0	0	0	1	0	0	0	0	0	0	0	0	0	0	0	0	0	0	0	0	0	0	0	1	0	0	0	1	0	0	0	0	0	0	0
PEX11A_5068	5	4	3	2	7	11	6	8	6	3	9	15	4	6	1	4	9	4	7	5	4	3	5	2	4	8	3	4	7	8	6	7	1	4	3	5	0	3	3	10	1	3	3	2	0	1	0	0	7
PFKL_5083	21	25	30	27	22	39	23	15	41	32	33	36	29	24	13	30	21	21	33	20	49	40	63	57	62	48	23	18	35	57	33	26	45	50	41	54	63	43	72	57	17	24	21	23	41	50	44	49	16
PGAM1_5090	231	179	263	296	338	320	185	189	196	230	228	285	180	190	163	171	211	201	271	261	448	454	537	580	442	441	177	130	311	371	187	174	278	329	415	518	764	615	693	727	223	169	286	256	221	213	240	230	278
PGF_5091	1	0	2	4	3	2	2	1	0	0	1	0	0	1	1	0	1	3	2	1	0	1	0	0	2	2	0	2	1	0	0	0	1	0	0	0	1	0	0	0	1	0	0	2	0	2	1	1	5
PGM1_5095	128	108	142	182	113	142	79	99	107	145	148	127	104	72	109	129	142	128	148	147	92	96	176	196	123	111	158	139	156	134	78	83	79	71	124	137	256	245	251	225	133	83	103	87	90	77	56	55	177
PGM3_5099	437	366	568	653	584	527	330	368	505	592	494	506	560	436	396	429	446	412	599	523	581	581	583	583	446	376	667	609	586	757	444	552	498	584	378	513	444	325	377	336	572	539	595	424	468	497	451	546	605
PGR_5102	1	0	0	0	0	0	0	0	0	1	0	0	1	0	0	3	0	0	0	0	0	0	0	0	0	0	0	0	1	0	0	0	1	0	1	1	2	0	0	0	0	0	0	2	0	0	0	0	0
PGRMC1_5105	143	120	166	197	202	221	111	95	146	135	186	184	192	160	138	110	150	148	233	188	129	87	114	176	135	132	118	93	180	266	132	130	119	123	62	94	97	72	76	78	184	156	152	103	156	154	65	100	184
JADE2_5110	0	1	4	2	0	0	0	0	2	2	0	2	0	0	0	0	1	0	0	0	0	3	0	0	3	2	2	0	1	0	0	0	2	5	4	1	2	1	0	1	0	0	1	0	2	0	0	0	0
PHGDH_5113	22	19	34	38	34	29	13	11	33	24	30	34	35	20	21	17	25	31	61	43	27	20	36	24	32	27	26	33	50	84	29	33	15	38	9	15	19	6	8	12	35	33	209	158	28	39	9	24	44
PHLDA2_5123	1	1	0	1	0	3	0	0	0	0	0	1	0	0	0	0	0	0	0	0	0	3	0	2	0	1	0	0	1	0	0	0	1	3	3	1	2	3	5	2	4	4	0	4	3	3	1	0	1
PHLDA3_5124	12	11	11	14	10	10	4	9	3	9	8	6	16	6	6	8	12	6	18	18	10	2	9	5	8	9	10	6	10	33	15	12	11	6	5	5	12	7	8	9	12	5	12	11	22	8	6	10	16
PHOSPHO1_5125	0	1	1	0	1	0	0	0	0	3	0	0	1	1	1	0	4	0	0	0	0	0	0	0	0	0	0	2	0	2	2	0	0	0	0	0	0	0	0	0	0	1	0	2	1	0	0	0	0
PHOX2A_5126	0	0	0	0	1	0	0	1	1	0	0	0	0	0	0	0	0	0	0	0	2	0	0	0	0	0	0	0	0	0	0	0	0	2	0	0	0	1	1	0	0	0	0	0	0	0	0	0	0
PI4KA_5128	376	370	530	579	432	479	397	397	479	515	495	534	487	407	370	369	429	394	464	411	291	247	368	392	311	268	339	308	515	575	284	303	284	313	196	264	308	255	303	290	394	446	479	375	385	320	205	214	533
PIGB_5133	4	3	11	14	11	7	8	2	6	8	10	12	10	4	4	6	7	4	10	5	8	3	7	8	7	7	9	3	11	8	5	5	13	10	3	3	5	5	5	1	11	6	2	6	6	4	3	5	6
PIH1D1_5136	13	7	20	23	23	14	10	11	15	17	31	29	14	15	9	7	10	20	12	17	13	12	13	11	10	17	29	14	24	24	12	8	10	11	10	13	10	12	12	14	19	17	11	12	13	9	7	8	21
PIK3C2A_5139	485	509	577	676	493	558	392	399	564	595	520	560	499	428	389	392	494	416	524	508	490	527	607	584	370	364	535	544	541	700	395	375	480	487	339	352	396	310	335	289	470	474	554	418	447	379	331	379	669
PIK3C2B_5140	1	5	6	0	2	4	4	3	3	4	1	5	9	1	2	0	2	3	0	3	1	1	4	4	4	5	4	0	3	7	3	4	0	3	0	4	2	2	1	2	4	0	3	5	2	2	2	0	5
PIK3C3_5143	165	146	237	266	197	202	183	138	189	238	176	197	171	182	149	158	139	147	161	189	169	184	201	248	138	174	231	199	202	223	138	135	123	163	156	191	179	172	200	176	214	187	242	228	156	152	132	127	250
PIK3CA_5146	23	1	14	23	19	14	4	8	21	18	9	7	16	13	11	13	9	6	19	16	14	13	17	13	8	10	18	12	21	32	11	24	16	28	27	18	17	6	16	9	10	23	19	14	23	14	10	16	7
PIK3R3_5150	31	32	77	60	59	45	44	41	25	42	54	66	25	55	51	45	33	53	31	41	14	14	17	19	24	18	8	9	46	47	12	5	21	24	25	14	6	14	12	18	22	22	11	13	13	11	13	13	49
PIN1_5152	355	307	509	309	519	484	267	221	351	343	318	413	184	307	300	298	379	381	105	392	294	260	341	383	266	278	403	215	397	184	255	239	296	327	238	279	209	245	205	201	393	295	124	308	328	238	219	234	449
PIP4K2B_5156	48	41	99	68	87	60	56	46	75	87	77	45	57	64	48	56	53	51	44	50	44	44	52	54	32	31	65	37	92	58	58	36	36	54	23	45	35	35	34	35	49	39	51	35	52	32	41	34	55
PITPNA_5157	204	231	312	373	269	288	181	158	286	347	182	213	252	186	204	210	255	191	211	233	317	301	266	268	178	169	326	290	208	209	294	260	268	306	354	372	198	230	155	157	314	283	156	115	268	244	289	307	284
PLA2G15_5170	9	5	11	11	5	9	5	8	3	12	5	4	6	10	6	7	5	4	11	5	10	8	11	6	5	5	8	4	9	6	8	18	10	7	2	5	5	4	6	4	17	4	2	3	13	16	4	3	7
PLA2G2F_5171	0	0	1	0	0	1	0	0	0	0	0	0	0	0	0	0	0	0	0	0	0	0	0	0	0	0	0	0	0	0	0	0	1	0	1	0	1	0	0	0	0	0	0	1	0	0	0	0	0
PLA2G4A_5172	16	8	24	25	22	20	8	18	19	23	8	10	14	18	14	27	14	12	13	14	49	56	54	47	26	26	17	13	5	16	13	16	41	61	97	120	85	83	53	61	22	24	31	24	36	34	71	69	13
PLAU_5178	316	259	398	552	415	361	228	254	470	539	442	415	431	270	259	202	308	348	584	287	530	434	567	616	360	352	659	760	511	919	378	544	562	654	277	310	440	288	276	249	1014	1105	1720	1157	490	450	352	385	425
PLCB3_5183	27	39	40	30	44	34	16	18	14	37	30	31	32	34	11	34	32	38	35	31	31	11	45	40	25	16	16	7	61	63	23	20	21	32	19	13	19	18	21	14	21	28	18	5	32	39	24	15	51
PLEKHJ1_5191	69	69	75	107	81	101	50	39	79	66	87	88	64	71	60	51	84	62	53	74	76	75	65	97	77	77	83	61	104	115	66	75	61	83	52	69	66	66	44	65	88	69	70	85	68	74	56	44	98
PLGLB2_5196	1	6	2	3	7	11	4	0	2	4	1	2	11	9	1	8	3	6	2	1	0	2	6	2	6	10	4	5	2	1	3	0	2	0	2	6	7	2	1	7	2	6	5	4	7	13	6	4	6
PLIN1_5199	1	0	0	0	0	0	0	0	1	0	0	2	0	0	0	0	0	0	2	0	1	0	0	0	0	0	0	0	0	0	0	0	0	0	0	0	0	0	0	0	0	1	0	0	0	2	0	0	1
PLK1_5203	31	31	23	33	38	53	34	26	22	19	41	25	28	19	22	20	30	34	67	27	22	10	33	42	45	46	14	6	55	83	14	25	11	32	17	21	24	17	11	18	18	18	29	21	23	33	19	25	50
PLOD3_5204	26	22	43	40	44	39	19	20	21	37	36	48	19	24	16	28	22	36	33	32	20	34	63	45	43	40	25	30	33	52	17	31	34	31	40	42	46	33	28	40	37	25	45	38	27	41	22	18	46
PLP2_5208	48	50	85	81	100	108	77	78	61	47	84	86	64	45	51	69	53	62	90	78	73	72	102	109	92	61	100	88	94	136	40	70	66	65	42	51	102	71	80	83	79	67	95	59	69	50	71	44	87
PLS1_5211	65	56	20	16	31	34	16	17	33	51	30	32	32	14	23	29	50	40	45	28	33	32	67	83	55	41	34	36	62	85	23	21	15	42	14	24	26	35	19	28	35	40	76	60	19	33	22	25	79
PLSCR1_5214	392	298	1846	2087	1950	1936	1137	1100	1726	1814	923	1002	1794	1460	1364	1312	474	441	547	492	5183	4959	5268	5428	3106	3028	533	497	576	736	1666	1467	3569	3863	5545	5818	5577	5166	3806	3436	1712	1751	1423	1234	2672	2506	3270	3871	488
PLSCR3_5215	55	51	57	93	45	49	32	40	73	65	55	48	68	49	44	39	50	46	72	60	44	31	33	33	24	28	22	25	68	101	51	56	44	43	35	43	37	22	20	16	73	66	43	28	62	69	36	45	70
PMAIP1_5221	1	0	1	1	2	0	0	0	1	1	0	3	5	3	2	1	2	1	1	1	2	1	2	0	2	0	0	0	0	6	0	8	2	1	2	1	1	2	1	1	4	3	4	7	6	4	1	0	0
PMM2_5224	43	54	46	80	44	45	24	14	49	59	26	44	48	33	33	27	53	39	37	37	75	64	51	71	30	35	49	48	29	65	60	46	60	58	59	95	67	75	42	41	58	58	95	62	65	48	66	74	58
PNKP_5229	461	500	795	846	659	688	490	560	620	677	474	536	461	429	516	470	551	423	561	485	644	612	657	741	507	499	386	327	548	636	338	329	462	425	468	540	451	554	489	467	558	509	412	303	448	391	309	325	746
POLB_5242	53	68	59	84	62	93	52	49	38	89	93	49	76	42	41	47	45	38	129	58	23	28	46	48	44	31	49	70	66	112	35	42	38	34	26	23	25	27	23	32	43	64	94	49	36	47	16	29	71
POLD4_5245	0	0	2	2	4	4	1	0	1	0	0	2	1	1	0	0	1	0	1	0	0	0	0	1	1	1	7	3	1	3	0	0	1	1	0	0	1	1	1	0	2	0	4	2	1	0	0	2	3
POLG2_5253	59	35	52	58	40	36	38	27	58	36	50	57	40	51	33	30	35	41	46	41	25	38	47	31	34	26	34	32	51	56	30	16	29	36	24	19	27	21	24	33	29	25	57	60	20	25	16	21	45
POLR1C_5255	16	9	15	20	23	14	6	20	22	18	14	24	22	23	10	10	24	14	19	23	23	23	30	29	18	9	40	12	15	22	15	12	17	26	16	18	18	18	6	13	21	11	23	10	9	10	7	14	27
POLR2E_5259	24	25	48	48	28	44	24	25	33	38	22	26	15	22	28	32	26	21	10	29	32	36	33	45	21	13	21	39	34	30	25	33	21	35	14	21	20	17	15	16	33	30	24	48	23	28	19	24	28
POLR2I_5260	33	30	52	63	52	66	43	53	59	44	74	86	63	61	49	40	45	52	65	63	56	28	23	53	48	29	69	40	67	59	39	46	28	48	23	35	32	26	35	26	65	50	57	60	58	43	23	31	69
POLR2K_5263	2157	2192	2367	2718	2403	2583	1618	1606	2417	2649	1814	2016	1772	1515	1745	1748	1931	1794	1850	1983	2041	1920	2268	2442	1589	1581	2585	2049	1931	2113	1620	1695	1537	1741	1530	1626	1558	1750	1448	1327	2263	2360	2016	1759	1742	1568	1175	1322	2735
POMZP3_5273	0	2	1	1	3	0	1	0	0	0	0	5	0	2	2	2	3	2	3	3	1	1	1	4	3	2	0	1	2	6	4	2	1	0	1	0	1	5	2	2	1	1	4	3	2	2	0	1	1
POP4_5281	22	20	45	40	39	59	30	30	40	40	35	38	23	47	37	23	32	31	28	37	30	28	51	55	23	23	52	26	37	35	15	26	33	30	14	24	19	22	31	29	33	26	33	37	23	35	19	27	55
POP5_5282	142	151	205	207	187	167	91	96	169	201	155	136	146	99	100	119	142	140	210	122	92	94	145	121	111	94	158	144	147	208	85	117	91	84	63	49	89	93	61	55	152	132	109	81	103	108	49	66	189
POR_5283	736	694	1001	1079	1186	1164	838	865	691	785	799	908	572	490	701	657	757	660	536	593	557	523	651	724	686	693	431	365	643	679	441	442	493	498	517	471	526	550	643	572	677	655	801	762	598	491	405	432	942
POU5F1_5291	12	8	12	14	32	25	12	15	11	12	12	11	11	10	11	11	16	9	10	10	29	29	40	44	35	18	22	17	38	17	7	9	10	23	16	24	43	45	66	50	9	12	44	46	3	9	9	9	26
AC010442.1_5295	23	19	24	34	25	21	14	14	29	30	25	29	31	14	6	17	18	16	29	17	39	14	23	42	19	20	11	8	19	59	7	6	13	10	14	11	16	13	17	13	30	23	45	16	16	14	6	12	22
PPARA_5300	11	7	18	3	15	15	15	7	17	17	11	13	11	4	7	8	19	18	14	8	9	17	6	12	11	14	12	6	14	16	21	7	8	12	22	17	15	18	7	18	13	5	13	17	13	11	8	20	15
PPIC_5321	321	269	538	530	421	400	285	306	401	433	362	375	380	372	326	301	247	299	370	327	308	281	339	345	240	245	403	350	302	381	274	291	227	285	273	287	255	238	319	279	341	374	293	262	364	291	216	265	431
PPIE_5325	186	144	203	183	206	211	120	134	191	255	127	176	111	156	117	125	170	131	137	149	157	131	196	185	142	155	153	132	215	198	104	75	117	118	101	95	127	130	116	114	155	132	218	176	109	94	96	83	199
PPIL1_5328	307	273	262	331	349	304	204	241	277	308	213	218	241	189	273	270	287	270	294	337	315	308	293	297	202	172	274	231	327	293	157	198	242	302	131	211	129	178	150	146	313	257	128	142	196	186	160	170	412
PPP1R13B_5339	9	6	11	4	3	7	9	3	13	9	6	8	4	21	11	6	7	9	11	18	8	7	7	6	7	4	6	3	5	9	11	11	4	10	7	12	6	0	0	2	11	11	8	4	18	29	5	3	21
PPP2CA_5356	345	362	441	634	499	481	344	392	362	563	445	484	423	349	305	299	422	357	565	388	393	456	602	633	414	422	453	453	476	779	422	416	403	423	313	374	499	401	330	323	421	465	728	484	473	472	271	322	548
PPP2R1A_5357	63	40	97	75	85	93	44	48	74	59	75	71	76	71	56	59	54	81	76	80	49	54	37	56	46	33	45	12	92	74	52	53	65	50	41	60	59	26	53	41	83	78	26	45	80	63	34	42	63
PPP2R3C_5360	37	33	70	37	56	74	30	30	51	58	41	38	39	34	49	35	36	36	36	55	60	65	62	94	33	44	67	43	61	37	37	56	30	49	32	48	37	33	18	25	47	43	37	33	33	37	33	25	63
PPP2R5A_5364	115	117	206	142	156	193	102	119	126	174	87	83	105	102	128	124	148	120	50	98	81	95	114	142	88	80	163	89	133	81	56	59	76	77	186	246	129	170	93	101	131	106	111	116	79	58	105	136	163
PPP2R5E_5368	234	188	245	235	250	276	144	174	222	208	120	184	130	135	115	150	188	192	106	189	158	137	201	259	132	121	230	181	174	155	156	159	121	159	155	159	129	118	128	124	182	208	154	153	167	168	112	140	199
PRDX1_5393	254	212	365	313	404	383	233	168	334	324	327	359	290	294	215	222	304	302	307	321	232	276	292	273	215	225	450	278	329	372	241	221	260	274	181	210	207	170	197	190	373	278	195	198	326	257	173	236	357
PRKACA_5404	326	325	355	406	387	402	201	242	321	362	221	304	254	201	266	260	288	289	266	297	231	229	241	314	211	200	149	135	381	394	213	211	208	246	189	209	242	216	208	185	297	298	220	207	233	228	167	158	407
PRKACB_5409	174	139	207	303	196	259	168	141	195	256	207	171	201	174	138	175	187	147	289	231	135	134	157	182	90	128	245	272	217	275	136	177	117	131	74	97	91	48	86	96	212	204	276	192	159	188	68	105	196
PRKAG1_5413	1264	1279	1530	1745	1454	1487	997	1137	1611	1721	1070	1287	1185	1030	1129	1184	1386	1235	1110	1334	997	1045	1095	1146	829	745	1372	1043	1229	1147	880	815	824	967	735	818	619	878	628	625	1327	1296	1035	967	932	817	653	680	1642
PRKAG2_5416	1	3	2	0	8	5	0	1	6	0	3	2	4	2	0	1	3	4	11	5	1	2	6	1	3	1	7	1	4	8	0	4	1	5	2	1	1	2	1	0	3	1	5	2	1	2	0	0	0
PRKCA_5422	10	8	4	11	15	16	14	8	5	8	12	21	10	9	23	6	12	7	12	5	10	0	5	13	2	9	18	15	10	15	10	9	8	9	1	1	3	1	3	4	5	8	7	21	16	9	2	0	8
PRKCD_5426	21	16	14	24	22	37	22	17	24	31	14	22	41	23	9	12	14	19	31	18	62	72	59	68	46	41	39	48	60	68	74	109	63	68	126	130	107	79	66	68	57	57	40	39	112	92	84	102	23
PRKCH_5429	0	0	0	1	1	0	0	0	0	0	0	0	0	0	2	1	0	0	1	0	1	0	0	0	0	1	0	0	0	0	0	2	0	0	0	0	0	1	1	0	0	2	3	0	2	0	0	0	0
PRKCQ_5430	2	0	1	3	0	1	1	2	1	1	0	0	1	0	1	1	0	0	0	1	0	6	1	3	0	2	2	0	1	1	0	0	0	2	3	6	3	1	0	0	0	1	2	0	0	0	0	2	2
PRKX_5435	7	7	12	7	14	12	4	7	6	3	10	9	14	4	8	9	10	6	7	7	13	18	9	10	10	14	3	11	23	17	14	6	19	11	3	16	9	14	5	12	8	7	10	17	11	10	13	13	16
PRNP_5442	60	63	100	53	72	54	46	46	86	91	53	78	65	76	48	48	71	87	64	66	71	74	41	58	57	59	138	99	102	86	58	80	71	70	55	43	41	36	56	48	86	103	155	179	81	58	44	61	84
PROC_5443	18	10	44	77	93	92	48	45	9	18	25	17	22	8	34	40	21	27	15	14	0	4	4	3	10	1	11	6	7	6	3	1	0	1	0	1	2	0	0	1	3	10	1	0	0	1	1	0	12
PROS1_5451	98	117	210	238	153	138	132	133	220	289	165	183	206	157	140	141	114	114	179	177	117	94	88	87	55	52	286	221	117	96	128	149	100	148	118	135	61	61	72	62	188	187	46	44	238	158	116	115	149
PRPF4_5463	32	24	36	24	40	35	28	26	25	29	38	44	25	32	21	35	35	39	32	36	55	31	30	40	26	34	19	22	34	44	31	26	30	39	30	30	33	23	20	26	22	31	29	28	31	19	45	39	47
PRR11_5468	925	878	1176	1339	1539	1676	753	792	777	907	588	586	645	581	801	738	928	811	593	651	966	924	1203	1278	822	800	747	681	973	1072	529	520	746	758	487	569	574	709	485	486	821	785	481	389	499	463	433	512	1276
PRR15L_5469	0	1	0	1	0	0	0	0	0	0	0	0	0	0	1	0	0	0	0	1	0	0	0	0	0	0	0	0	0	1	0	0	0	1	0	0	0	0	0	0	0	2	0	0	0	0	1	0	0
PRR5_5472	0	0	0	2	1	0	0	0	0	0	0	2	0	0	0	0	1	0	5	2	0	0	2	0	1	2	1	0	3	2	2	3	0	3	0	1	3	0	1	0	0	0	1	0	4	1	0	0	1
PRR7_5473	46	62	93	93	73	77	53	70	83	101	52	70	50	42	44	51	38	45	78	86	25	24	28	32	39	12	51	43	42	66	37	31	26	21	21	6	25	28	38	33	60	65	48	41	44	35	13	15	53
PRSS23_5481	207	241	273	289	276	263	164	199	214	256	333	278	247	213	140	186	221	278	440	301	146	125	139	176	123	139	277	298	261	462	188	214	173	230	31	60	85	60	64	60	274	236	244	167	186	162	90	110	319
PRUNE1_5487	15	12	14	29	19	15	7	16	17	17	16	18	12	9	5	18	34	23	21	17	6	2	7	17	6	9	5	8	16	19	3	9	2	6	6	4	7	7	4	5	12	8	13	5	12	9	4	3	26
PSAP_5489	482	348	773	833	607	600	471	445	664	827	825	773	739	658	557	450	566	560	821	794	521	437	515	642	435	435	668	535	819	906	594	572	542	579	345	422	323	248	311	333	715	583	679	567	736	637	435	445	664
PSEN1_5495	150	140	276	319	244	204	156	196	272	222	271	251	278	224	169	155	143	179	305	213	214	185	239	212	166	210	236	257	205	385	220	307	262	267	300	317	286	210	220	217	246	258	306	174	345	321	231	296	207
PSENEN_5496	105	60	219	231	192	199	177	127	104	116	160	115	97	120	112	118	96	108	136	129	114	93	85	119	93	69	163	143	99	160	112	115	121	108	142	201	147	98	122	114	135	102	132	131	150	144	109	138	151
PSMA1_5501	186	170	294	281	309	333	165	146	230	214	235	219	225	171	179	160	159	170	185	215	274	191	273	307	184	173	267	231	238	283	151	194	181	280	249	271	270	228	249	199	238	221	233	225	236	197	181	202	234
PSMA7_5506	1103	1080	1406	1479	1426	1474	757	910	995	1177	705	828	860	736	926	961	1155	961	841	923	1026	1155	1321	1364	910	897	930	829	1080	1081	738	693	742	860	983	1112	1120	1248	945	916	1081	921	1061	880	743	712	721	807	1456
PSMB10_5508	1	0	4	0	7	4	1	3	1	1	0	3	3	1	0	4	0	3	0	2	3	2	0	4	1	0	0	1	1	0	0	0	1	2	3	4	1	4	2	2	5	1	2	1	3	0	2	1	0
PSMB3_5511	137	145	227	334	251	278	170	196	157	143	261	198	231	136	142	140	159	137	306	168	162	156	262	214	177	158	163	213	216	351	126	166	143	170	226	258	328	233	281	284	157	156	270	141	187	179	180	203	211
PSMC3_5517	0	4	1	5	8	0	6	1	0	0	2	2	1	7	0	5	0	2	6	1	2	0	2	1	2	0	5	1	2	6	4	0	0	5	0	1	0	0	2	2	2	2	0	1	3	1	0	1	4
PSMC6_5518	124	98	194	179	159	171	100	105	125	167	114	133	119	96	121	107	150	130	94	132	162	120	134	150	150	136	159	101	184	176	93	91	109	124	105	111	119	97	123	138	157	125	132	112	133	101	95	98	200
PSMD10_5521	332	309	534	571	547	480	328	339	390	421	513	465	422	385	293	285	404	397	524	375	249	250	359	339	291	289	437	367	409	523	285	321	236	288	178	280	266	188	273	216	431	410	361	310	332	318	171	227	441
PSMD14_5527	348	290	595	499	600	477	322	250	332	396	414	421	335	366	312	319	358	372	451	435	428	397	444	502	394	405	484	315	535	547	334	357	426	410	280	302	315	283	374	329	434	366	471	571	437	360	281	332	551
PSMD2_5528	5	8	4	4	16	8	1	3	7	7	6	8	7	4	2	6	7	5	11	7	5	2	11	3	11	5	7	4	5	7	4	7	4	14	2	5	4	4	2	9	5	10	6	8	6	1	2	5	4
PSMD4_5530	69	59	69	77	63	71	52	42	58	80	80	99	68	67	54	42	60	51	68	68	54	68	82	83	51	58	48	57	100	112	60	49	48	71	26	35	44	42	58	46	81	50	70	71	66	52	39	35	74
PSMD9_5533	2	0	2	0	2	0	0	0	0	0	0	1	0	0	0	3	1	0	3	1	2	0	0	0	0	0	1	0	2	0	0	3	0	0	0	3	2	2	0	0	0	2	1	2	1	0	2	0	0
PSME1_5534	28	22	92	122	106	104	117	104	29	38	123	118	57	42	57	44	24	43	38	49	71	65	78	129	92	85	47	23	93	105	36	33	41	76	73	86	105	92	122	116	38	37	119	84	75	53	67	75	37
PSME2_5535	197	148	1084	1328	1566	1442	1061	1124	265	269	456	555	413	374	709	680	243	204	204	155	868	794	1224	1383	853	835	202	158	452	438	300	351	492	614	987	1122	1206	1196	998	1010	351	349	663	661	373	390	491	536	248
PSME3_5538	27	23	35	22	45	48	18	19	27	39	26	45	21	31	23	28	16	35	37	37	47	23	37	45	27	30	47	48	54	46	31	35	38	30	22	33	36	27	35	25	41	29	42	44	35	30	18	28	43
PSMF1_5541	44	41	126	90	123	150	79	62	59	61	101	114	67	89	83	56	32	49	51	66	147	136	132	123	125	106	96	61	99	75	71	87	107	157	123	130	111	85	105	107	94	58	64	95	95	77	96	99	80
PSMG1_5544	625	557	682	788	726	812	432	440	586	591	405	465	430	449	551	552	645	528	531	573	753	777	917	1061	521	572	574	511	637	671	358	363	435	501	465	541	585	639	478	418	519	427	879	770	340	294	312	322	888
PSRC1_5548	74	47	299	288	274	262	217	167	159	206	203	215	215	206	232	192	75	72	105	91	54	68	68	80	86	66	54	35	87	83	45	27	48	69	68	105	105	92	119	101	98	60	61	57	85	58	77	100	88
PTEN_5553	33	25	42	47	54	44	16	17	38	28	22	29	21	19	13	14	24	18	12	19	17	19	22	33	7	15	19	28	36	19	26	14	10	19	9	9	14	25	14	22	34	15	32	26	16	7	10	18	28
PTGFR_5569	0	0	1	0	0	0	0	0	0	0	1	0	0	1	0	0	0	0	0	0	2	1	2	2	1	0	1	0	0	0	0	0	4	3	2	5	0	2	0	3	2	1	0	0	0	0	1	3	0
PTGS1_5572	0	0	0	0	1	0	0	0	1	0	0	0	0	1	0	0	0	0	0	0	0	0	0	1	0	0	0	0	0	0	0	0	0	0	0	2	0	0	0	0	0	1	0	0	1	0	0	0	0
PTGS2_5577	12	8	11	9	9	11	7	4	14	25	6	14	12	18	13	10	9	2	8	13	21	33	22	17	8	9	21	7	21	14	30	16	30	34	26	34	24	11	21	26	20	11	18	11	31	21	31	31	10
PTK2_5583	44	41	69	60	78	56	28	49	43	60	66	62	61	32	48	64	44	52	87	68	64	51	54	58	49	50	47	55	98	106	58	43	66	69	22	57	59	28	60	75	64	33	55	62	49	38	38	48	67
PTK2B_5584	13	7	26	35	25	30	23	21	25	20	8	15	11	14	14	9	14	6	10	7	18	7	20	21	22	21	7	0	8	5	6	8	13	14	64	52	47	40	31	47	23	10	11	15	11	1	22	32	10
HACD3_5591	80	81	88	130	128	111	114	99	99	153	127	153	92	87	82	55	66	66	98	96	78	105	107	153	59	86	73	64	82	100	81	51	62	77	48	56	80	76	63	65	102	105	62	71	79	78	44	48	97
PTPN1_5592	12	11	18	17	15	21	8	14	11	37	10	19	14	12	9	6	16	10	17	14	17	16	22	19	16	21	13	7	8	10	14	16	12	8	34	17	17	30	9	12	15	19	24	18	22	21	13	13	28
PTPN12_5598	577	479	896	765	733	839	415	391	692	794	480	533	428	579	516	503	601	520	263	484	1360	1301	1187	1326	943	874	1297	924	1006	736	1004	874	1063	1189	1785	2100	1612	1604	1564	1353	1118	1009	1121	1360	1190	1089	1377	1424	670
PTPN6_5601	1	1	2	1	0	2	1	2	0	1	2	1	1	0	1	0	0	2	0	0	2	0	1	2	1	0	3	0	0	3	1	1	0	1	0	0	0	0	2	2	0	0	1	0	2	1	1	0	0
PTPRC_5605	0	0	0	0	0	0	0	1	1	0	0	0	0	0	0	0	0	0	0	0	0	0	0	0	0	0	1	0	0	0	1	0	0	0	0	0	0	0	0	0	0	0	0	0	1	0	0	0	0
PTPRK_5618	78	65	194	132	174	145	124	97	105	117	98	93	120	95	144	124	92	96	112	110	262	265	210	245	147	131	82	104	199	248	197	221	244	276	234	274	298	198	213	160	105	88	253	212	157	177	224	217	105
PTTG1_5623	29	33	20	27	40	58	24	17	29	17	26	20	13	12	12	16	31	21	8	14	16	19	33	33	29	33	20	19	37	36	16	11	12	11	21	18	36	24	25	34	27	17	10	17	19	13	17	6	36
PUF60_5625	63	56	94	53	71	83	61	38	55	66	71	86	63	64	65	48	73	66	77	79	63	50	42	68	40	41	65	50	81	62	45	52	54	45	37	45	56	51	39	39	74	60	54	49	64	62	32	28	83
PUS7_5632	150	163	135	161	147	194	81	104	111	170	100	123	148	106	128	118	156	120	136	137	248	302	274	321	166	140	164	133	220	206	155	131	183	200	211	270	249	364	183	170	133	137	242	220	117	119	114	149	199
PVR_5634	8	7	12	17	20	15	5	10	15	15	9	17	17	9	10	16	5	9	10	9	6	8	8	12	9	4	7	6	6	5	8	5	5	10	16	9	10	12	5	12	12	10	25	26	23	22	9	13	12
PVR_5635	27	21	35	56	33	57	18	21	46	44	23	27	43	24	30	38	29	28	55	38	35	28	27	42	39	19	40	24	21	41	34	37	26	30	43	45	49	55	45	32	39	39	91	69	50	41	30	34	39
PXMP2_5641	18	9	11	22	16	14	15	7	11	15	14	10	8	27	19	11	12	21	10	16	8	9	10	13	15	8	12	7	19	12	13	17	14	12	10	11	6	3	10	4	16	15	12	14	13	13	4	12	21
PXN_5642	13	9	19	12	14	11	15	13	16	14	18	29	21	13	12	19	10	8	26	21	11	3	17	8	5	7	11	9	19	21	10	17	7	11	5	5	6	10	14	11	7	19	11	9	12	10	6	1	21
PYCR1_5644	0	0	2	0	1	0	0	0	0	0	0	2	1	0	1	2	1	0	0	0	0	2	0	2	0	0	0	0	1	0	2	1	0	1	0	0	1	0	0	0	2	0	1	3	1	2	0	2	1
PYGL_5647	23	27	57	43	41	25	36	23	33	36	27	32	26	33	32	21	39	29	36	31	23	31	31	35	19	29	41	30	36	36	28	13	31	35	10	10	27	16	31	24	38	28	27	43	27	41	13	17	41
RAB11FIP2_5656	28	32	45	58	60	50	35	36	38	57	44	41	70	46	38	33	31	34	94	35	21	28	45	38	30	30	68	58	59	59	24	34	29	31	21	26	34	30	33	44	36	40	108	69	24	22	22	17	51
RAB21_5663	416	309	463	407	564	474	332	284	473	532	429	440	371	407	324	360	410	431	328	509	438	429	461	480	383	375	562	365	489	430	425	389	451	552	352	461	326	310	375	365	570	443	517	710	479	422	352	357	611
RAB27A_5667	74	59	186	207	192	185	113	106	149	146	98	99	159	147	118	142	93	95	80	99	274	255	257	279	177	183	147	148	171	140	122	131	204	227	509	630	421	424	366	356	229	191	188	168	300	299	367	438	124
RAB31_5670	389	399	739	771	782	810	444	458	537	590	496	534	443	389	453	419	393	447	490	445	511	466	488	532	315	313	490	442	473	616	379	374	371	464	599	588	563	539	451	409	540	500	567	518	455	402	373	405	612
RAB4A_5674	43	34	42	78	48	67	53	67	40	72	54	34	51	47	54	49	53	41	51	61	28	54	28	41	37	46	53	46	41	42	26	42	34	34	15	33	27	13	20	28	45	39	20	26	46	28	15	19	55
RAC2_5695	0	0	0	0	2	1	0	0	2	0	0	0	0	0	0	0	0	0	0	0	0	0	0	0	0	0	0	0	1	0	0	0	0	1	0	0	0	0	0	4	0	0	0	0	0	0	0	0	0
RAD21_5698	195	200	270	250	312	280	167	159	213	231	236	258	223	229	171	138	180	199	239	184	241	222	256	271	208	191	211	181	250	313	158	173	198	186	149	165	153	115	145	138	205	246	197	144	198	242	139	153	222
RAD51C_5708	19	18	15	28	18	33	13	15	13	19	17	11	16	17	27	18	24	19	24	22	31	19	36	28	34	27	26	12	36	35	17	9	8	17	7	8	6	18	29	16	20	19	20	29	22	13	6	12	33
RAD9A_5709	60	36	69	58	59	72	73	62	49	82	46	65	40	31	59	55	70	37	54	61	104	117	99	114	54	71	37	27	40	62	69	59	91	82	92	114	103	102	85	69	41	31	42	23	58	53	58	97	50
RAE1_5712	182	140	207	188	184	213	137	111	163	165	176	162	135	113	133	125	173	139	182	181	185	169	222	249	148	136	212	163	200	239	146	144	162	181	162	156	159	125	112	109	176	170	183	158	164	133	115	144	202
RAI14_5716	18	22	18	22	34	37	14	10	12	25	21	20	20	13	19	15	22	15	23	19	51	31	28	46	39	40	40	26	42	41	45	23	36	50	21	53	19	21	22	24	48	17	25	46	37	28	24	25	46
RALA_5719	63	44	107	83	111	109	61	49	93	98	96	84	92	98	75	64	45	60	65	80	60	63	45	76	74	53	74	71	101	106	79	76	64	68	135	199	101	87	89	97	140	122	96	71	180	195	131	131	70
RALGDS_5721	22	22	107	86	83	79	45	34	90	69	38	55	46	87	73	61	47	16	13	43	73	59	63	49	47	52	86	45	34	26	75	40	42	28	106	137	56	60	72	71	110	103	12	20	190	128	102	116	28
RAP1GAP_5729	0	0	0	1	2	1	0	0	1	0	0	2	1	1	2	1	1	1	2	0	1	0	1	0	0	0	0	2	0	0	0	0	0	0	1	1	2	0	0	0	2	1	1	1	0	0	0	0	0
RARA_5733	179	194	251	314	291	215	179	172	156	171	193	182	116	91	197	166	194	202	194	225	62	69	117	122	91	77	106	87	148	169	74	59	63	75	49	95	80	91	84	81	105	75	160	138	49	34	34	29	266
PLAAT4_5736	422	383	16506	19372	16571	17638	12725	14568	1915	1898	6091	6761	3627	2862	6890	6871	649	496	599	486	2477	2385	3216	3330	2942	2966	947	822	1379	1589	828	857	1249	1251	8899	8731	9116	10417	7859	7360	1566	1456	3776	3022	2364	2249	3670	3805	447
RASA1_5742	66	41	108	84	90	100	56	70	98	98	94	99	66	65	53	51	97	51	57	86	79	77	76	65	45	45	134	97	92	98	62	64	60	81	33	59	48	48	63	43	71	101	99	81	88	74	47	51	100
RASSF1_5747	36	37	40	29	46	46	23	27	23	43	43	25	27	34	28	19	41	32	24	34	71	73	56	82	37	47	70	52	48	45	48	38	83	81	91	116	62	66	68	69	63	54	59	78	65	57	48	78	60
RB1_5752	95	60	166	113	172	173	75	75	96	136	107	102	88	105	94	117	85	100	81	118	152	142	133	162	83	93	207	109	141	100	100	76	126	134	144	170	101	79	96	75	139	77	77	110	142	96	107	143	101
RBFOX3_5755	1	0	0	1	0	0	0	0	0	1	1	1	0	3	0	1	0	0	1	1	1	1	2	2	0	1	3	0	2	1	0	0	1	2	1	0	0	0	0	0	2	0	0	1	0	0	1	0	1
RBKS_5758	2	0	0	6	2	6	5	0	7	3	1	2	3	1	0	4	2	1	2	3	2	3	3	3	2	2	6	6	1	6	4	4	1	0	0	0	4	2	0	2	3	5	4	2	2	5	2	0	2
RBM15B_5765	17	13	15	14	12	10	16	8	12	13	15	15	8	16	13	12	9	16	7	13	11	17	12	18	11	12	12	5	25	25	4	8	17	12	4	16	8	8	8	7	28	15	12	13	17	19	8	7	14
RBM34_5768	37	30	29	46	38	37	27	37	32	41	26	27	29	22	50	43	35	23	34	22	43	41	55	60	39	43	22	33	45	45	22	22	33	34	52	79	41	61	62	58	38	35	53	40	38	36	43	52	59
RBM6_5774	137	139	272	249	203	190	177	196	238	267	294	287	236	183	136	153	214	154	263	207	166	186	158	186	165	174	272	193	231	279	172	177	187	159	118	154	124	109	148	113	186	200	225	171	182	166	95	121	203
RBX1_5781	7	11	10	17	6	5	4	6	12	19	12	14	15	9	12	4	9	9	21	8	12	10	9	9	7	9	5	8	9	27	12	15	8	11	11	13	6	6	5	7	14	10	17	5	7	12	5	9	15
RECQL_5786	856	756	1190	1124	1243	1267	656	621	762	891	550	711	509	590	861	830	844	712	605	795	2269	2004	1687	1808	1060	970	878	680	1154	1002	765	701	1471	1718	2140	2167	1738	2026	1383	1326	869	792	608	747	858	736	1378	1403	1125
REEP5_5789	249	248	460	444	424	465	271	264	358	333	306	372	283	316	288	287	263	288	265	348	256	298	291	333	274	272	276	227	327	289	255	282	257	307	302	324	271	253	327	326	345	323	256	346	335	311	276	289	345
REG1A_5790	0	0	0	0	0	0	1	0	0	0	0	0	0	0	0	0	0	0	0	0	0	0	0	0	0	0	0	2	0	0	0	0	0	0	0	0	0	0	0	0	0	0	0	1	0	0	0	0	0
RET_5800	0	0	0	0	1	0	0	0	1	0	0	0	0	0	0	0	0	0	0	0	5	2	4	6	0	2	0	0	0	0	0	0	0	2	7	4	9	7	8	9	0	0	0	0	2	0	1	4	0
RET_5801	0	0	0	0	0	0	0	1	2	0	0	0	0	0	0	0	0	0	0	4	1	0	2	3	1	2	0	0	0	0	0	0	0	0	1	1	2	1	3	4	0	0	0	0	0	0	3	1	0
RFC2_5805	34	28	51	49	71	38	29	33	33	31	34	31	30	33	35	38	30	29	41	50	69	91	72	83	37	47	27	25	55	64	45	41	42	59	74	104	107	85	63	86	45	45	14	28	62	69	75	61	49
RFC3_5808	177	158	162	196	231	225	93	106	109	133	107	132	101	81	111	112	142	138	182	170	257	323	260	378	191	197	121	110	222	260	66	95	139	159	87	91	136	111	163	123	131	91	159	104	82	66	39	64	248
RFC4_5811	35	25	23	60	63	50	19	26	33	25	34	27	33	23	30	33	33	31	82	34	92	71	78	67	52	48	40	38	46	95	21	34	60	54	13	16	64	25	47	36	18	31	50	24	17	15	17	23	48
RFC5_5812	25	11	23	18	21	36	18	12	15	24	17	12	3	21	19	24	15	21	20	26	38	36	30	42	22	23	9	14	28	28	13	16	13	31	12	9	19	17	29	16	8	4	5	10	11	4	9	9	28
RFNG_5813	41	33	55	70	34	36	41	23	59	46	41	65	49	46	32	44	34	38	52	51	28	34	26	31	38	42	46	57	47	53	48	37	24	40	28	38	31	43	27	28	29	49	71	63	28	29	30	37	58
RFX5_5817	62	33	130	164	96	76	72	96	61	70	142	104	125	57	75	68	62	53	145	63	112	86	79	99	55	98	83	80	96	185	64	69	67	78	70	66	88	48	81	73	75	94	119	70	94	98	71	74	75
RGPD3_5823	2	10	7	15	11	13	5	7	14	6	6	12	6	13	11	7	3	7	2	2	9	8	10	4	10	7	18	8	12	12	6	6	11	6	4	6	10	3	8	12	23	10	16	9	8	4	2	7	10
RNASEH2A_5875	58	46	50	62	54	80	44	40	31	22	48	54	37	37	32	46	47	46	78	57	85	101	107	107	97	73	25	15	67	85	21	21	42	50	26	27	73	48	45	65	38	24	24	24	26	19	27	15	74
RNF167_5885	359	381	496	564	513	412	351	329	412	465	535	411	496	348	332	329	354	343	539	401	232	208	257	275	215	241	413	463	391	535	293	336	242	258	169	164	184	136	169	105	417	379	373	338	333	308	174	181	490
RNH1_5893	61	47	69	82	73	77	58	24	49	65	48	63	42	45	62	54	48	53	52	55	57	55	75	96	54	63	33	40	90	65	24	46	60	72	53	76	65	57	75	53	50	45	74	85	61	62	24	48	75
RNMT_5894	29	28	40	65	46	35	30	29	39	42	37	33	30	27	50	32	32	33	35	44	30	46	39	62	28	21	38	33	70	83	50	44	40	24	19	34	48	22	32	35	59	40	99	54	38	35	20	31	48
RNPS1_5895	1661	1570	1738	2012	1815	2008	1100	1211	1554	1689	1233	1357	1334	1201	1381	1384	1579	1399	1306	1470	2035	2029	2131	2513	1606	1469	1624	1391	1971	2012	1219	1378	1598	1740	1432	1692	1606	1795	1347	1380	1640	1492	2213	2010	1361	1232	1218	1280	2169
RPA2_5905	6	11	14	23	13	15	11	10	6	2	8	12	14	7	10	14	10	18	37	25	26	21	25	22	13	15	8	6	20	35	7	20	23	35	5	9	16	18	14	28	8	8	19	23	7	10	10	9	10
RPA3_5906	12	16	14	24	34	29	12	20	13	17	18	31	13	21	19	8	22	17	28	21	49	18	29	36	23	29	17	12	29	38	11	20	19	17	18	18	22	17	27	24	12	12	13	16	24	14	15	10	31
RPAP3_5909	775	662	1079	1165	1059	1035	649	641	880	917	647	693	689	584	777	715	761	686	610	667	934	1127	1053	1175	751	684	1030	826	768	889	750	700	727	800	771	970	714	948	735	659	946	953	817	685	718	653	583	603	1020
RPIA_5911	3	8	3	7	6	4	6	2	10	7	6	7	13	1	5	5	1	7	13	8	3	12	10	4	1	3	1	4	10	29	6	7	6	12	9	10	9	6	6	6	1	6	4	12	7	3	6	7	9
RPL11_5914	3247	3075	4195	4669	4130	4140	2490	2590	3996	4249	2918	3053	3089	2798	2936	2904	3079	2750	3243	3322	3131	3193	3391	3532	2087	1953	4244	3512	3465	4131	2655	2731	2560	2909	2612	2793	2421	2445	1791	1728	3929	3684	2794	2565	2973	2647	2156	2316	4327
RPL13A_5916	203	204	252	236	267	282	150	123	257	221	225	215	232	220	174	154	236	220	262	231	160	124	161	189	110	102	306	231	273	237	164	205	166	176	81	68	101	64	91	68	325	230	159	166	196	169	84	103	304
RPL22_5923	1034	860	1418	1191	1201	1172	724	662	1248	1384	1007	1079	977	1031	953	859	1090	993	727	1193	834	826	647	650	419	448	1478	1027	1091	938	991	889	823	998	524	602	369	369	395	324	1317	1126	772	899	1072	904	572	693	1354
RPL27_5929	206	154	236	252	237	218	174	163	207	194	290	258	264	238	187	170	198	230	355	269	184	128	207	172	121	139	235	180	319	407	164	208	225	254	116	139	178	104	125	147	219	178	264	204	264	233	177	187	259
RPL36_5938	788	593	1123	1127	944	973	736	589	941	1034	865	827	754	814	726	704	837	770	922	860	854	763	899	1068	688	686	966	675	954	964	723	721	768	819	639	757	706	620	689	598	856	824	904	882	840	703	582	642	895
RPL36A_5939	1	0	4	1	1	5	1	2	1	0	1	4	0	4	0	0	1	0	3	0	1	2	2	0	0	1	0	0	1	3	1	1	0	1	1	0	4	2	1	1	2	2	1	1	0	0	0	3	1
HNRNPH2_5940	730	648	1105	1190	1040	1034	682	707	1003	1211	716	914	838	770	695	732	722	621	642	715	564	729	673	787	549	522	1016	822	765	740	610	591	426	558	675	796	569	594	484	427	987	915	554	510	789	678	577	599	965
RPL39L_5945	2	0	8	10	11	6	3	3	5	1	3	3	0	1	7	1	2	0	6	5	7	8	11	5	7	10	10	2	10	9	3	4	7	10	8	10	7	7	9	5	4	5	8	5	4	1	1	6	7
RPL6_5953	762	730	863	874	913	830	482	538	782	954	740	719	837	799	636	726	776	799	947	922	587	576	593	613	416	389	869	788	1095	1138	749	698	672	825	390	459	418	387	374	318	835	790	727	753	849	717	512	585	1117
RPL7A_5954	3858	4110	4245	4678	4131	4188	2755	2909	4416	4461	3118	3481	3636	3267	3345	3342	4082	3725	3948	4107	3416	2884	3007	3355	2025	1994	3335	2467	4428	4321	3065	3056	3163	3480	2478	2449	2431	2422	1854	1925	4020	4235	2091	1915	3785	3200	2864	2780	5100
RPL9_5956	1911	1915	2080	2725	2012	2079	1284	1481	1971	2148	1744	1724	2362	1755	1597	1501	1671	1624	3105	1895	1597	1524	1547	1618	941	826	2017	2311	2067	3005	1599	1980	1453	1763	1162	1308	1337	1055	869	783	1993	2218	2360	1522	1884	1931	1289	1425	2471
RPN1_5965	3364	3728	4530	5375	4749	4860	3421	3645	4061	4443	3189	3412	3218	2786	3522	3394	3696	3279	3415	3332	4627	4866	5593	6213	3811	3374	2588	2222	3490	3634	2679	2757	3151	3515	4472	4559	4527	5582	4105	3699	3920	3978	2469	2432	3173	3081	3017	3322	4911
RPS2_5983	3563	3885	4515	5019	4962	5358	3247	3184	4807	5506	3954	4808	3808	3423	3276	3123	3700	3475	3087	3727	4843	4648	3892	4435	2224	2129	7620	6047	4085	3943	3780	4334	3115	3327	3151	3338	3492	3735	2208	2247	4904	6483	3611	3555	3877	3308	3347	3581	5069
RPS20_5987	110	99	169	179	148	194	91	81	161	235	85	89	84	82	112	111	126	103	66	119	119	157	91	93	43	31	171	133	103	77	122	113	88	115	46	87	33	51	22	19	173	131	31	35	114	104	84	105	122
RPS27A_5998	184	160	274	259	283	248	153	134	186	226	199	181	213	187	150	142	153	179	201	218	193	185	246	270	124	110	286	237	275	322	176	216	180	235	143	175	189	136	118	119	257	208	221	203	227	166	138	179	250
RPS27L_6001	35	74	55	57	69	64	29	36	84	58	62	68	49	60	43	45	43	52	78	57	88	35	91	72	45	46	64	40	70	83	32	51	52	33	37	34	63	59	33	27	64	83	84	83	57	50	34	32	57
RPS4Y1_6010	0	0	0	0	0	0	0	0	0	1	0	0	0	0	0	2	1	0	0	0	0	0	0	0	1	0	0	2	0	0	1	0	0	0	0	0	0	0	0	0	0	0	0	0	0	0	0	0	0
RPS5_6011	905	842	1156	1067	1205	1240	777	696	1024	1160	1001	1098	945	928	854	840	982	949	1021	1084	917	818	1011	1100	700	607	1129	831	1340	1284	906	858	890	1027	711	894	825	611	663	579	1101	991	1021	1006	1056	928	654	722	1216
RPS6KA1_6015	0	1	1	2	1	1	2	1	0	0	0	1	5	3	3	1	1	1	1	0	1	0	1	4	1	0	3	4	1	0	2	0	1	2	1	3	4	1	8	2	1	2	2	4	3	3	2	2	3
RPSA_6025	76	67	95	148	115	141	84	62	106	107	80	85	79	92	57	82	91	76	90	98	99	88	97	103	79	55	74	61	118	115	94	71	97	99	74	94	103	107	67	51	92	112	105	81	111	74	48	62	126
RRAGA_6028	783	720	1004	977	876	927	574	590	806	834	821	775	754	711	627	625	686	671	651	767	587	604	667	711	568	565	941	815	926	946	599	682	531	667	562	756	690	689	668	648	832	723	615	656	727	656	519	563	969
RRM1_6031	292	233	339	246	394	466	200	160	228	250	207	225	176	203	230	193	260	295	215	289	377	375	455	482	301	253	276	209	353	320	166	138	235	299	111	153	167	162	216	195	277	197	65	104	192	154	95	148	350
RRM2_6034	42	44	43	53	67	71	35	38	23	23	58	42	42	15	34	21	37	29	51	43	91	89	136	133	70	71	26	26	82	118	17	15	48	42	16	30	65	44	63	65	32	27	41	39	36	28	12	11	91
RRP12_6035	25	43	22	38	36	32	24	31	33	41	23	29	24	21	34	23	21	12	30	34	39	47	37	33	19	37	54	20	34	28	33	40	35	41	21	26	44	48	16	18	39	39	43	44	30	25	17	21	43
RRP1B_6038	68	41	78	71	79	57	45	26	41	36	50	54	48	50	36	39	47	58	46	59	73	86	61	109	64	63	82	50	92	99	79	52	73	76	49	58	60	49	45	48	59	61	77	61	61	40	55	71	70
RRP8_6039	17	11	12	10	20	26	7	14	13	8	19	12	17	15	17	15	9	17	21	20	15	4	13	21	9	24	16	6	12	16	15	15	19	21	12	9	7	8	16	2	8	15	25	22	14	6	8	11	32
RRS1_6040	11	12	10	8	10	12	1	2	3	15	14	10	3	11	7	4	8	9	20	5	15	12	7	15	2	5	15	12	17	18	9	11	12	12	0	6	5	7	5	14	20	15	23	28	14	14	4	8	13
RSAD2_6043	0	0	29	28	15	22	16	20	6	10	14	14	8	4	25	13	0	3	7	3	252	229	227	280	186	160	0	2	3	2	37	35	173	190	190	205	264	149	201	199	0	2	14	11	39	36	121	139	2
RSU1_6052	237	159	355	264	325	289	214	131	286	325	269	244	165	258	240	210	195	228	174	272	228	225	202	250	129	150	208	141	312	231	202	151	207	234	324	479	328	316	387	305	315	257	146	209	324	243	268	293	292
RUNX1_6059	2	0	3	5	3	1	0	2	0	4	8	0	1	8	1	2	0	2	0	1	1	1	3	2	3	3	7	4	3	6	0	0	1	2	2	1	1	0	1	2	2	7	5	1	1	1	2	4	0
RUNX1_6060	12	11	16	17	16	17	8	6	33	23	9	12	24	17	11	12	6	7	5	11	10	5	10	15	3	9	26	19	21	18	7	13	8	11	7	15	12	6	7	15	27	26	11	17	13	18	4	8	20
RUVBL1_6065	274	209	432	405	437	425	249	199	244	287	335	314	264	233	260	288	277	248	276	304	271	230	330	351	218	203	308	234	337	337	211	222	251	256	171	196	201	149	168	145	299	274	396	442	243	190	197	195	332
S100A4_6083	26	22	40	16	42	40	29	14	36	33	36	47	20	20	21	25	41	42	40	43	23	22	19	34	16	40	33	13	46	48	22	31	16	28	21	22	22	20	19	18	27	26	15	26	38	37	25	12	30
S100P_6092	1	0	0	5	0	0	5	0	1	6	0	1	0	1	0	4	0	0	0	1	0	0	0	0	1	1	0	0	2	1	0	0	0	0	1	1	2	0	1	0	2	1	7	9	0	1	0	3	1
SACM1L_6098	332	314	392	520	531	476	365	400	508	700	368	454	389	340	350	314	306	287	310	318	395	420	487	647	351	344	514	420	425	469	384	307	311	345	331	337	446	397	396	304	546	524	375	346	386	393	298	291	544
SATB1_6106	42	54	45	61	47	42	56	59	90	98	86	80	55	50	34	37	60	56	71	65	34	31	52	47	43	29	73	54	80	86	29	28	34	32	10	24	14	17	18	18	67	78	34	39	42	35	10	25	79
SCAND1_6116	36	19	38	39	53	36	20	30	32	46	22	33	23	43	27	29	20	35	38	33	42	29	38	16	23	19	18	8	32	48	17	32	30	40	20	32	18	7	13	21	32	22	29	33	36	29	27	22	59
SCARB1_6117	11	10	13	17	8	5	5	5	9	21	6	4	13	10	4	8	10	13	14	8	4	10	4	6	11	4	5	4	9	18	11	6	13	6	4	3	5	1	1	2	7	17	13	16	11	12	3	8	15
SCCPDH_6120	450	410	646	649	574	561	381	398	528	564	448	443	453	432	483	428	441	421	475	512	522	533	590	550	362	383	552	532	443	545	357	422	439	437	311	396	350	300	332	291	595	447	329	304	441	369	260	352	672
SCNN1G_6143	0	0	0	0	1	0	0	0	1	1	0	0	0	0	0	0	0	0	0	0	0	0	0	0	1	0	0	0	0	0	0	0	0	0	0	1	0	0	1	0	0	0	0	0	0	0	0	0	0
SCP2_6152	486	456	669	782	626	631	464	432	697	695	803	673	668	571	461	458	495	478	781	635	428	396	436	425	353	321	724	756	548	744	517	574	481	519	322	383	317	212	266	301	698	595	389	352	565	526	341	362	639
SCRN1_6155	466	352	514	513	470	478	316	330	458	460	458	473	381	394	378	344	450	412	466	453	418	408	410	451	322	304	466	320	462	479	419	397	405	459	302	375	335	348	302	268	447	432	333	351	424	424	320	371	574
SCYL3_6157	90	79	279	290	235	239	174	183	338	444	107	138	283	200	214	181	121	80	75	105	115	120	117	152	120	95	83	106	90	124	88	72	84	82	284	290	214	252	171	206	271	236	88	97	253	218	192	189	114
SDC1_6160	24	26	30	29	29	34	14	13	14	11	18	14	21	14	23	23	29	23	34	26	11	21	20	31	15	31	18	24	56	117	13	14	10	17	9	10	14	13	24	16	22	19	69	43	27	12	13	7	43
CAVIN2_6177	0	0	2	1	2	5	0	0	0	3	0	1	4	3	0	1	0	1	1	0	2	4	5	7	10	6	1	0	0	1	2	1	3	3	1	0	3	1	2	1	2	2	2	0	2	1	0	0	1
SENP6_6219	284	251	364	503	424	414	281	248	301	396	491	368	455	367	258	256	277	276	517	341	269	330	374	366	280	278	548	521	445	699	313	428	277	309	195	245	271	177	258	254	406	393	671	534	451	429	182	231	418
SEPTIN5_6225	2	4	3	1	3	0	1	2	1	2	1	1	5	3	2	1	3	3	3	4	3	3	2	1	0	1	0	3	1	2	1	0	8	1	0	0	1	0	4	1	2	4	2	7	1	3	2	2	7
SERPINA1_6246	0	0	0	2	0	0	1	2	0	0	4	4	3	2	5	3	1	0	2	2	0	1	0	0	3	5	1	0	1	1	3	2	4	2	1	4	1	2	7	4	1	1	4	2	1	4	5	3	4
SERPINE1_6253	1339	1416	555	562	818	830	268	262	542	615	574	639	538	480	526	521	987	1044	1118	1079	1227	941	1308	1489	691	665	869	615	1234	1457	660	637	1585	1876	334	386	1074	881	579	572	575	550	2496	2313	299	249	352	419	1829
SESN1_6261	24	29	47	48	44	41	36	25	31	52	54	27	71	30	17	30	35	39	42	40	20	28	50	38	30	42	34	23	49	82	19	12	19	22	18	18	30	25	23	22	20	13	60	50	26	15	10	17	30
SFN_6269	0	0	0	0	0	1	0	0	2	0	0	0	2	0	0	0	0	0	0	0	0	1	0	0	0	0	0	0	0	0	0	1	0	0	0	0	0	0	0	0	0	0	0	0	0	0	0	0	0
SGCB_6277	428	388	707	677	752	725	455	438	586	644	494	622	502	580	546	532	438	444	369	538	782	645	607	716	480	474	668	451	505	400	525	436	673	694	876	1001	663	656	684	662	662	612	325	411	724	613	668	718	553
SGK1_6282	2	1	3	2	1	3	2	2	10	7	3	0	6	12	2	2	3	5	1	1	2	5	10	4	3	2	21	10	2	4	6	4	2	7	1	7	1	0	3	0	9	6	7	9	7	5	1	0	9
SGK2_6283	1	2	1	2	9	5	0	1	3	3	0	2	1	2	0	2	1	2	2	1	4	1	1	1	3	2	3	0	3	6	3	2	1	2	0	1	1	3	0	0	4	1	1	3	7	1	1	0	0
SGK3_6285	2	1	1	0	2	0	2	3	1	2	4	1	2	0	1	0	4	2	4	4	1	1	0	4	0	0	0	2	1	9	3	5	1	2	1	0	6	3	7	2	3	1	1	0	5	0	0	2	2
SGO2_6289	218	201	255	258	349	374	147	146	136	175	128	130	128	104	156	147	229	226	138	170	211	177	275	308	246	282	166	132	227	249	71	96	143	218	103	90	126	118	140	134	154	136	108	86	74	90	74	105	285
SH3BP5_6291	1	0	0	4	1	1	1	0	0	6	1	1	2	0	2	4	3	3	3	2	0	0	1	1	2	3	3	1	4	10	0	0	1	4	1	3	4	3	0	0	4	5	1	7	1	0	0	0	1
SHC1_6301	146	137	230	247	219	219	165	149	161	175	236	234	196	128	140	129	121	124	300	168	202	180	217	187	180	209	148	162	305	532	147	176	186	212	117	146	244	160	204	212	166	160	546	347	147	175	122	125	242
SHCBP1_6304	294	287	375	329	602	570	255	232	190	229	236	263	167	162	233	246	319	327	314	312	509	525	620	671	480	395	254	220	431	448	156	161	309	382	224	249	295	265	351	306	265	266	189	219	194	181	196	217	521
SIRT3_6320	9	20	26	20	15	15	12	14	19	20	11	21	21	12	16	17	12	18	10	18	8	6	15	16	10	10	12	8	11	12	9	6	18	5	7	6	5	8	3	4	10	12	4	9	14	18	2	4	14
SKIV2L_6323	11	4	5	12	6	2	3	2	11	3	11	4	5	6	5	3	6	7	2	7	8	0	2	6	9	8	1	4	4	4	5	4	8	9	10	4	10	9	10	7	7	2	4	8	4	4	6	6	4
SLC11A2_6335	358	293	443	472	433	444	289	306	509	621	309	313	350	329	382	330	411	326	272	337	501	557	587	700	452	452	594	437	395	349	437	335	302	381	929	1026	633	818	568	491	525	491	312	330	443	380	452	439	479
SLC16A7_6342	0	0	0	0	1	0	0	0	0	0	0	0	0	0	0	0	0	0	2	0	0	0	1	0	0	0	0	3	0	0	0	0	0	0	0	1	0	0	1	0	0	0	0	0	0	1	0	0	2
SLC1A4_6371	7	17	14	6	12	17	4	8	6	9	14	12	4	3	5	7	5	20	18	12	9	13	24	13	7	20	0	2	10	9	11	15	12	7	8	8	13	12	10	13	7	13	45	38	17	10	2	6	8
SLC22A6_6384	0	0	0	0	0	0	0	0	0	0	0	0	0	0	0	0	0	0	0	0	0	0	0	1	0	1	0	0	0	0	0	0	0	0	0	0	0	0	0	0	0	0	0	1	0	0	0	0	1
SLC25A13_6394	100	101	135	118	113	122	51	88	74	111	94	117	87	76	98	88	96	106	108	132	115	136	132	144	88	99	114	92	145	163	92	103	105	121	81	107	85	75	82	68	73	81	101	101	88	78	98	86	144
SLC25A14_6397	4	3	10	13	15	21	8	5	6	7	10	7	10	12	2	2	10	11	14	6	3	15	14	13	2	10	17	7	8	14	7	5	3	10	4	4	14	8	7	6	6	5	14	11	4	3	3	6	3
SLC25A4_6406	360	355	258	314	287	348	191	198	360	449	245	257	250	231	261	202	319	256	286	334	239	252	257	339	205	207	282	249	223	244	193	187	209	208	208	225	234	282	251	221	313	301	201	178	200	178	151	162	491
SLC25A46_6412	15	14	27	19	23	27	10	12	17	29	30	27	25	17	10	15	17	17	16	21	23	19	24	19	14	14	28	25	20	23	12	17	11	26	8	18	10	11	12	9	13	22	14	21	26	13	10	17	16
SLC27A2_6426	0	0	0	0	1	0	0	0	0	0	0	0	0	0	0	0	0	0	0	1	0	1	0	1	0	0	0	0	0	1	0	0	0	0	0	0	0	0	0	0	0	0	0	1	0	0	0	0	0
SLC27A3_6427	1	2	9	6	9	3	7	3	3	7	5	4	5	5	1	10	4	7	1	6	2	7	1	2	1	1	4	1	8	7	1	4	3	5	1	0	4	3	1	5	2	3	4	3	1	2	0	0	8
SLC2A2_6439	0	0	1	3	0	0	0	0	0	0	0	0	0	0	0	0	1	0	0	0	0	0	0	0	0	0	0	0	0	0	0	0	0	0	0	0	0	0	0	0	1	0	0	0	0	1	0	0	2
SLC2A3_6444	47	56	142	113	122	102	96	75	157	166	101	106	114	116	100	94	73	92	77	88	82	58	68	71	67	58	86	41	79	74	45	37	47	77	100	112	110	86	93	135	107	100	116	175	107	97	100	94	81
SLC2A6_6447	25	20	18	20	14	8	7	7	27	12	13	22	20	20	14	13	21	15	22	28	79	66	94	83	85	76	73	43	36	40	100	86	65	84	195	226	165	173	168	154	85	93	16	17	99	113	94	124	37
SLC35A1_6463	74	55	137	115	176	155	75	107	68	104	92	83	96	90	133	121	41	50	62	81	101	122	151	142	77	106	74	60	68	74	83	52	106	119	166	244	181	156	164	136	68	61	72	55	111	85	149	182	81
SLC35A3_6466	335	293	388	485	363	407	228	244	343	411	292	318	286	271	249	299	378	312	257	286	316	341	349	381	271	253	377	352	283	359	264	289	258	295	298	288	236	279	274	227	377	367	345	280	291	273	235	210	426
SLC35A5_6470	1204	1215	1956	2180	1741	1731	1196	1308	1923	2175	1326	1538	1355	1134	1270	1258	1211	1108	1165	1288	1459	1454	1570	1638	1099	1002	1743	1487	978	1119	928	991	964	1052	1400	1521	1442	1636	1137	1158	1596	1496	1239	1195	1009	961	773	982	1594
SLC35B1_6471	79	77	115	120	108	99	66	66	87	103	77	110	88	91	84	69	60	101	98	107	108	89	85	108	88	59	136	89	83	109	74	107	83	96	66	79	85	62	73	47	98	83	84	82	120	97	80	78	131
SLC35F2_6477	75	76	35	42	39	45	18	29	47	42	33	25	23	21	34	36	67	65	44	71	160	138	146	124	86	74	92	45	136	99	45	52	93	114	63	73	73	92	61	74	39	37	99	109	50	30	27	45	102
SLC37A4_6478	7	9	18	18	14	10	4	20	14	14	12	11	9	17	10	8	15	14	10	4	12	12	12	16	6	9	9	9	10	20	8	8	7	11	11	10	5	13	5	18	8	14	7	7	12	11	4	7	13
SLC5A6_6501	1	1	3	3	0	1	4	2	0	0	0	1	0	1	0	1	0	1	2	1	4	4	7	5	2	1	0	3	3	4	3	4	2	7	1	1	1	1	2	5	0	3	4	2	3	1	2	2	2
SLC6A19_6515	0	0	0	0	0	1	0	0	0	0	0	0	0	2	0	0	0	0	0	0	0	0	0	0	0	0	0	0	0	1	0	0	0	0	0	0	0	0	0	0	0	3	0	0	0	0	0	0	0
SLC6A3_6518	0	0	0	3	0	1	0	0	0	1	0	0	0	1	0	0	0	0	0	0	0	1	0	0	0	0	0	0	1	0	0	0	0	1	1	1	0	1	1	0	0	0	0	0	1	0	2	0	0
SLC6A8_6522	105	94	125	130	107	113	72	81	137	146	121	114	118	117	96	80	97	87	109	122	58	64	43	35	53	48	152	86	118	123	80	79	81	90	18	29	23	22	33	27	142	112	84	90	92	95	29	53	136
SLCO2B1_6541	0	0	0	0	0	0	0	1	0	0	0	0	0	0	0	0	0	0	0	0	2	1	2	4	1	4	0	0	1	1	0	0	0	1	1	1	1	2	2	1	0	0	1	1	0	0	1	1	0
SLIT2_6545	360	380	506	709	524	543	464	472	868	1015	582	700	618	553	455	474	429	398	475	443	883	897	993	1134	626	598	439	465	738	774	596	485	560	627	1290	1396	1684	1917	1566	1542	686	720	1797	1634	511	504	682	724	508
SLK_6551	486	455	616	760	664	643	455	429	678	756	429	529	523	512	468	440	506	412	432	389	573	653	657	806	482	475	800	766	585	680	552	555	450	464	917	1104	704	784	671	557	811	827	697	588	821	832	812	843	673
PRELID3B_6554	254	223	291	283	345	332	171	205	230	271	335	275	267	249	195	219	221	254	269	294	289	233	303	317	292	248	319	267	419	410	256	226	225	321	169	220	238	179	239	203	272	270	657	629	249	261	163	210	378
SMAD1_6558	128	97	206	168	182	178	141	117	236	316	197	199	108	147	128	91	139	128	79	140	124	96	116	114	91	102	221	122	153	125	66	62	71	78	81	104	55	89	121	89	190	147	78	106	74	70	67	94	162
SMAD3_6562	233	213	206	228	203	234	129	148	223	256	192	204	166	161	153	145	234	166	212	192	465	547	769	858	409	442	403	271	449	511	572	492	552	550	657	796	760	878	494	484	540	479	433	365	401	363	555	530	362
SMAD4_6563	19	12	23	33	20	19	20	13	30	25	25	26	21	24	25	17	19	21	31	25	19	22	15	18	19	6	37	27	25	29	20	17	17	20	8	8	10	9	13	12	16	19	5	18	23	26	13	14	24
SMAD5_6566	427	501	560	851	592	544	383	455	466	537	655	477	707	439	381	425	408	409	709	496	450	399	533	577	350	350	551	656	656	1037	415	508	452	471	333	383	426	309	308	273	484	562	687	414	463	510	299	351	589
SMAP1_6570	31	28	68	59	47	51	38	28	39	52	71	71	55	57	40	43	48	52	43	56	40	40	36	45	50	28	80	53	65	50	50	19	47	46	20	38	20	33	27	39	62	35	36	33	47	29	30	20	58
SMARCA4_6573	97	114	129	177	182	148	109	83	84	134	168	124	158	120	99	97	104	111	223	144	138	119	141	161	145	121	144	123	187	295	111	137	117	146	80	95	151	80	107	123	139	120	153	137	127	140	89	91	153
SMARCC1_6575	91	59	93	77	83	72	57	56	65	75	91	77	83	59	59	64	67	78	114	76	80	94	89	90	75	71	91	77	100	159	80	82	76	89	37	44	58	46	47	46	73	55	106	85	73	87	62	51	108
SMARCD2_6579	0	2	2	0	2	0	3	1	5	0	0	1	1	0	1	1	0	0	1	0	3	2	2	2	0	0	1	0	1	0	0	0	0	0	1	0	3	4	2	1	1	2	2	1	0	0	0	3	0
SMC1A_6580	242	227	445	475	331	333	238	260	333	377	240	264	344	242	303	248	256	235	322	297	411	398	344	381	227	183	327	248	300	293	210	223	304	341	214	247	154	170	149	112	314	250	101	116	278	228	216	210	414
SMC3_6583	59	56	62	88	80	83	66	69	52	65	106	77	87	59	54	58	61	79	124	65	83	68	75	88	90	85	51	42	104	146	64	61	85	80	26	53	47	45	53	61	59	71	87	67	49	52	31	26	69
SMC4_6586	483	420	774	759	1055	984	489	493	430	442	420	458	395	296	422	452	481	445	473	489	832	901	1073	1281	796	797	461	411	746	821	292	289	544	532	426	438	626	564	592	539	419	439	368	329	324	313	332	305	735
SMIM19_6589	633	617	855	1020	806	869	693	626	856	1020	652	811	608	605	667	611	645	544	631	660	478	625	648	673	478	448	876	701	719	750	464	471	435	514	411	427	391	493	441	412	746	684	834	895	515	409	339	392	878
SMNDC1_6595	815	879	1016	1081	1089	1149	670	709	991	1130	638	705	681	668	781	786	835	722	639	736	838	1005	1064	1241	750	681	1138	944	895	1071	765	812	757	840	1036	1020	822	1090	855	678	996	973	963	804	886	751	725	758	1203
SNAI2_6603	24	28	52	37	62	55	22	17	57	69	20	18	32	33	33	38	15	16	27	18	30	56	83	61	47	38	67	58	50	54	26	38	31	45	21	18	33	15	20	23	52	46	68	52	16	11	13	24	54
SNAP25_6607	0	1	2	2	0	0	3	3	0	0	2	2	0	0	2	1	0	1	0	7	7	2	1	3	1	2	1	0	3	1	1	0	2	6	4	5	4	5	4	6	3	0	2	1	2	1	4	3	0
SNCA_6612	332	291	241	243	271	290	149	232	288	343	255	306	235	290	192	172	313	297	296	314	135	119	165	209	151	139	266	192	186	200	146	173	159	121	65	92	96	101	105	101	264	247	207	178	137	145	90	81	422
SNHG8_6618	1219	1144	1195	1453	1429	1463	806	912	1245	1268	1040	1100	1206	891	1049	929	1056	988	1444	1202	990	1068	1223	1321	745	686	1280	1115	1229	1568	813	903	852	992	651	786	877	906	681	633	1115	1124	5099	3540	779	781	575	643	1607
SNRPA_6627	83	49	139	91	117	113	53	40	79	101	92	87	64	82	60	72	91	92	105	120	107	99	125	145	92	91	40	19	156	163	59	49	123	124	60	119	93	80	77	75	100	62	96	123	99	61	64	76	116
SNRPG_6644	819	806	867	923	1065	1134	546	620	706	821	606	691	543	488	630	667	714	750	664	745	1027	956	1228	1403	812	706	655	642	1002	976	552	508	694	805	782	884	972	1078	752	793	714	629	704	667	575	480	567	594	1057
SNX13_6653	568	580	920	993	850	870	509	643	945	1052	590	632	617	542	664	592	686	494	560	614	462	565	614	623	391	406	954	776	646	599	425	413	385	361	443	471	410	503	374	390	775	782	683	619	468	531	387	373	815
SNX7_6656	900	844	1290	1397	1234	1374	832	797	1112	1224	660	869	792	712	919	863	909	691	565	733	1043	1052	1148	1216	692	669	909	651	763	687	639	564	790	849	1380	1495	1137	1395	817	828	954	867	386	429	718	634	833	910	1284
SOCS1_6657	3	1	43	25	57	48	14	16	37	41	6	5	30	59	47	41	2	2	1	4	18	12	13	9	14	26	0	0	8	3	6	7	26	10	47	98	60	66	85	78	24	10	3	10	76	42	63	59	4
SOCS2_6660	160	137	349	370	218	248	199	231	543	617	186	230	242	229	184	148	205	177	156	186	379	448	400	438	202	189	1115	1023	177	172	381	411	198	203	222	243	145	189	87	109	1138	1052	234	171	533	525	119	146	187
SOD2_6667	60	52	140	134	84	112	66	87	137	102	69	107	86	99	95	75	127	80	92	113	1506	1592	1562	1765	1252	1372	931	643	318	318	1277	1219	1198	1352	2710	3047	1951	2098	1988	1905	1233	1087	737	740	1758	1608	1971	2056	64
SOD3_6668	0	0	4	0	0	0	0	2	0	0	2	0	0	0	0	0	0	0	0	3	2	2	0	0	0	2	4	3	2	3	0	0	2	0	1	1	0	0	2	0	2	1	3	2	0	0	0	0	2
SOX1_6677	0	1	0	0	0	1	0	0	0	0	0	0	0	1	0	2	0	0	0	0	0	0	0	0	0	0	0	0	0	0	0	0	0	0	0	1	0	1	0	0	1	0	0	0	0	0	0	0	0
SOX2_6683	179	135	278	254	262	234	168	163	139	147	310	293	169	145	168	168	209	191	233	186	153	116	162	171	143	161	75	53	263	306	66	81	131	149	79	109	129	82	124	141	72	60	244	196	59	48	65	47	224
SOX4_6686	63	49	129	95	83	82	68	45	83	72	129	123	53	70	56	43	89	82	99	93	31	20	37	52	49	31	68	31	127	117	11	18	20	22	10	13	21	15	20	26	43	35	45	40	6	11	9	7	98
SPAG4_6691	7	2	1	10	0	2	2	5	5	4	9	10	4	2	3	3	7	2	2	4	6	7	7	4	6	4	4	3	10	6	2	6	4	7	1	2	4	4	13	5	9	6	7	13	3	4	3	2	10
SPAG7_6692	50	60	78	71	66	96	26	50	64	54	61	70	61	56	59	49	51	49	74	68	72	38	61	70	55	51	47	49	98	88	50	54	54	79	62	76	64	55	64	42	52	57	63	75	83	69	64	52	74
SPANXA2_6696	4	2	1	7	4	3	2	0	6	4	8	8	0	2	2	2	8	4	5	5	5	8	8	11	5	6	3	4	13	8	1	1	4	3	3	3	4	1	6	6	2	2	4	9	4	1	5	5	4
SPANXB1_6698	2	0	0	2	0	0	0	0	1	0	0	0	0	0	0	1	0	0	0	0	0	0	0	0	0	0	0	1	0	0	0	0	0	0	2	0	1	0	0	1	0	0	0	0	0	0	0	0	0
SPC25_6704	244	222	246	279	328	416	153	161	151	171	200	148	157	120	186	144	236	243	213	209	250	273	385	417	285	276	161	141	309	368	107	108	136	156	65	97	166	121	165	196	217	154	102	107	122	124	61	73	357
SPDEF_6706	4	12	7	9	8	6	7	9	9	7	11	4	3	3	9	3	3	0	4	8	7	10	2	4	3	1	2	7	2	1	2	4	1	6	3	5	7	9	2	3	10	3	4	7	10	7	10	2	3
SPEN_6707	395	398	550	513	446	507	393	397	394	456	346	436	379	345	389	338	446	334	388	429	482	476	515	600	504	427	604	514	452	566	526	435	449	469	507	568	500	517	450	458	674	673	460	393	626	608	481	479	525
SPP1_6720	735	706	1168	1350	1139	1138	713	638	1288	1430	808	882	857	749	855	894	782	650	814	882	787	837	922	896	479	465	1215	1068	324	347	689	670	623	734	653	719	518	663	402	383	1143	1033	1001	930	881	770	595	659	1017
SPR_6721	4	2	8	4	14	6	4	2	6	9	7	7	6	5	4	4	7	7	3	4	4	7	13	8	7	7	6	5	12	6	3	3	1	6	5	5	11	12	5	11	8	7	5	3	2	7	4	6	12
SPRED2_6724	119	129	115	135	131	145	76	76	146	124	104	120	112	129	84	71	116	118	98	120	97	120	105	113	101	69	167	100	148	218	97	86	91	106	51	44	97	70	105	80	122	108	139	128	80	85	54	48	151
SPTAN1_6727	151	113	179	179	209	216	160	144	178	252	227	229	190	172	164	144	151	134	254	187	123	137	206	215	132	139	145	99	139	173	181	141	117	156	82	115	115	97	123	112	152	163	90	85	158	140	102	83	174
SPTLC2_6732	71	65	109	115	123	85	74	60	70	73	99	70	67	86	85	65	61	62	59	64	171	167	191	195	115	163	93	60	99	93	109	78	168	184	141	153	141	127	135	126	87	85	56	60	121	120	132	166	97
SQOR_6737	7	0	10	18	9	23	16	11	8	2	5	13	3	7	6	19	5	5	3	1	44	50	47	62	50	56	4	2	5	6	16	20	29	31	100	156	172	156	127	155	3	9	17	17	16	11	45	55	7
SQSTM1_6740	119	93	202	98	141	121	103	108	139	172	152	184	93	146	112	116	151	133	88	194	220	203	260	272	212	212	91	47	242	129	161	131	227	213	102	145	125	105	180	180	181	143	252	411	178	122	112	112	152
SRM_6753	65	72	77	100	88	73	33	41	67	41	57	64	52	37	56	60	60	55	85	97	105	90	91	93	43	36	42	45	80	83	53	63	74	79	44	63	64	57	48	61	66	73	131	88	67	46	47	53	120
SRSF7_6776	80	62	87	90	71	92	49	55	55	61	67	77	60	62	69	60	59	68	94	80	95	87	115	89	93	81	97	90	121	113	54	81	98	133	64	75	81	54	82	67	80	76	97	101	95	70	53	82	88
SSR1_6784	159	173	284	284	219	233	190	172	219	289	189	206	189	180	212	201	208	150	159	184	154	116	101	109	52	53	225	191	163	176	164	149	135	163	128	160	73	78	62	41	214	167	93	87	153	150	128	141	206
ST3GAL5_6802	41	51	56	45	55	37	35	36	41	49	37	51	24	28	27	28	51	36	62	53	43	46	33	45	30	28	90	59	45	52	82	63	39	48	30	37	23	16	21	17	60	41	25	44	59	45	18	35	75
ST7_6809	174	202	217	275	244	226	189	151	222	271	226	275	240	204	159	144	210	250	302	232	275	300	290	318	213	215	245	212	317	313	166	160	225	214	142	207	200	182	208	216	211	202	245	244	205	155	158	162	307
STAMBP_6819	2	10	14	7	13	9	3	10	11	14	5	9	8	2	3	6	4	10	9	6	10	7	9	10	9	9	15	23	16	15	6	7	7	21	6	9	12	3	6	12	14	3	8	7	6	16	11	14	9
STAP2_6820	41	35	47	53	46	59	33	33	40	26	32	30	31	30	23	38	43	35	36	40	405	384	570	656	477	453	40	50	186	269	83	87	214	224	418	561	719	608	596	565	50	40	122	78	81	86	182	216	54
STAT1_6824	84	66	1127	828	963	851	622	534	301	287	507	562	443	454	703	590	132	131	98	107	1237	1014	994	1127	836	869	111	60	154	107	347	268	931	984	783	960	984	770	1170	1118	282	257	311	473	508	460	714	652	113
STAT3_6829	38	26	102	99	77	85	66	53	80	107	77	90	73	79	52	54	41	54	48	58	70	72	82	101	87	66	86	35	85	79	65	61	85	49	83	93	72	55	64	76	85	62	38	69	108	83	65	98	53
STAT5B_6835	371	408	412	408	369	390	265	260	464	471	336	368	340	296	275	287	347	290	316	315	267	249	307	332	313	274	318	255	486	493	384	426	250	261	380	386	297	334	336	288	468	485	363	341	510	410	321	360	546
STC1_6839	0	4	0	0	1	0	0	0	1	1	0	0	0	1	1	0	0	5	2	0	0	0	2	0	1	2	2	3	0	0	0	0	0	0	1	0	1	1	0	1	0	2	1	2	0	0	0	0	0
STK10_6844	160	160	162	205	239	226	89	116	137	191	110	173	180	133	152	136	145	144	123	121	181	174	198	217	149	149	208	150	160	175	295	268	228	196	259	297	230	229	204	203	219	215	196	149	334	311	238	240	227
STK25_6852	274	263	400	351	361	380	231	255	281	316	291	273	260	239	286	258	271	240	300	247	237	192	233	251	155	154	138	106	350	401	204	222	234	258	221	241	208	202	222	216	267	270	251	189	286	236	196	195	430
STOML2_6858	243	211	321	307	248	271	141	171	238	250	181	223	160	170	171	205	235	225	248	189	234	215	188	256	199	165	200	163	293	258	161	156	187	203	164	160	182	219	154	189	178	167	251	240	183	133	159	131	315
STRBP_6859	58	53	79	86	71	65	44	70	80	95	48	70	93	67	50	52	64	43	81	93	27	30	37	52	31	28	85	105	57	83	59	54	31	27	15	14	17	14	17	6	58	50	25	42	43	40	13	15	90
STUB1_6861	18	25	38	23	27	41	26	15	26	26	31	27	25	32	19	26	24	25	40	28	21	23	32	27	12	15	15	6	24	36	22	14	19	18	20	22	30	24	16	35	21	30	27	27	28	28	11	20	24
STX1A_6864	7	0	3	0	0	0	2	2	5	6	5	5	1	4	4	1	2	4	3	4	2	2	2	1	4	0	1	0	6	2	3	1	1	4	0	1	1	4	3	5	1	8	13	12	2	1	1	1	6
STXBP1_6866	125	160	190	227	202	203	141	147	174	204	160	125	166	167	134	179	123	116	129	99	87	91	112	110	114	93	155	111	123	141	136	132	88	149	309	326	232	223	217	231	218	231	139	102	336	365	276	286	180
STXBP2_6867	3	1	6	3	2	1	5	0	2	1	4	5	7	2	5	3	5	4	3	2	1	0	0	1	7	6	0	4	10	8	1	1	3	0	1	0	5	5	8	6	3	2	13	16	0	2	0	0	8
SUCLA2_6870	274	244	316	362	305	331	191	211	255	303	333	312	229	231	203	232	270	234	352	275	198	211	296	247	201	200	278	291	252	413	217	245	237	254	145	211	208	158	176	134	275	252	301	222	232	212	184	203	353
SULT1A1_6871	0	0	0	0	0	0	0	0	0	0	0	0	0	1	0	0	0	0	0	0	0	0	0	0	0	0	0	0	0	0	0	0	1	0	0	0	0	0	0	0	0	0	0	0	0	0	0	0	0
SULT1A1_6872	0	0	0	0	0	0	0	0	0	0	0	0	0	0	0	1	0	0	1	0	0	0	0	0	0	0	0	0	0	0	0	0	0	0	0	0	0	0	0	0	0	0	0	0	0	0	0	0	0
SULT1A1_6874	0	0	2	0	1	4	0	1	0	0	0	0	0	0	0	0	0	0	1	0	1	0	1	0	1	0	0	0	0	4	0	0	1	0	0	0	0	0	0	1	0	5	0	0	0	1	0	0	0
SULT1A2_6875	0	0	0	0	1	0	0	0	0	0	0	0	0	0	0	0	0	0	0	0	0	0	0	0	0	0	0	3	0	0	0	0	0	0	0	0	0	0	0	1	0	1	0	0	0	1	0	0	0
SULT1B1_6880	0	0	2	1	0	0	0	0	0	0	0	0	0	0	0	0	1	0	0	1	0	0	0	2	0	0	0	2	0	2	0	0	0	0	0	0	0	1	0	1	0	0	0	0	0	0	1	0	2
SUMO1_6890	187	196	212	300	189	230	151	166	209	208	167	215	157	189	183	181	193	198	176	189	187	176	191	186	140	136	238	185	238	256	159	166	196	146	102	111	106	89	103	86	253	167	186	161	171	177	105	126	245
SUPV3L1_6897	33	31	35	59	52	52	33	20	39	40	50	48	55	38	39	32	37	26	93	46	34	29	52	70	37	44	58	73	74	103	40	49	47	52	29	34	58	38	30	30	64	51	239	139	45	48	25	28	59
SUZ12_6905	416	393	466	512	449	388	280	250	390	425	331	313	393	294	318	310	375	372	418	461	1581	1382	1305	1505	941	1001	1455	1174	770	954	1207	1222	1020	1118	1200	1373	917	822	736	629	1144	996	587	520	1263	1275	1008	1000	531
SYK_6907	0	0	0	0	0	1	0	0	0	0	0	0	0	0	1	0	0	1	0	0	0	0	0	1	0	0	4	0	0	0	0	0	0	0	0	1	0	0	0	0	0	0	0	0	0	0	0	0	0
SYN1_6908	0	1	1	0	0	1	0	0	0	0	1	1	0	0	0	2	1	0	0	0	0	2	2	2	0	0	2	0	0	0	0	1	0	0	0	3	2	1	4	0	1	0	0	1	2	0	0	1	0
SYNE2_6916	262	271	908	1094	844	787	573	694	324	399	395	458	455	404	524	515	285	295	310	237	343	379	466	566	335	357	345	282	314	362	208	227	223	229	525	612	585	613	596	583	355	367	431	302	317	314	410	395	441
SYNGR3_6917	14	4	11	5	14	18	19	18	9	10	12	22	12	6	17	11	7	14	15	9	25	28	60	50	42	36	24	14	17	17	51	31	30	37	67	70	63	35	61	72	21	20	8	16	41	27	33	29	14
SYP_6919	0	1	0	3	0	1	1	1	3	2	0	1	1	0	1	1	1	1	1	1	0	0	1	0	0	0	0	0	0	0	0	1	0	2	0	0	0	0	0	0	0	0	0	0	0	1	1	2	1
SYPL1_6922	302	279	515	544	456	542	293	318	387	469	353	421	365	336	293	307	364	350	399	396	458	466	454	526	365	335	490	398	444	444	323	315	381	478	359	437	417	365	373	307	412	408	411	367	345	301	267	307	463
SYTL1_6923	1	1	1	0	2	0	0	0	1	0	1	1	1	0	0	1	0	1	0	3	0	0	0	1	0	1	2	0	2	3	0	0	0	0	0	0	1	0	1	0	0	2	8	13	0	0	0	0	0
TAF7_6938	260	233	388	439	402	347	240	235	301	365	308	328	284	327	263	235	278	268	333	295	324	328	414	413	325	290	421	359	369	441	249	281	283	324	247	293	280	229	266	241	350	314	294	260	294	282	237	245	322
TALDO1_6942	221	187	391	437	406	373	271	270	214	291	327	293	204	233	230	228	227	287	250	223	260	218	269	302	205	224	268	170	318	289	170	189	221	265	248	265	265	212	256	279	244	232	274	294	248	196	176	224	281
TAPBP_6944	117	106	358	393	402	412	332	316	186	227	350	309	147	172	197	221	144	129	129	129	586	581	706	767	532	574	161	128	407	414	280	231	361	433	626	725	666	700	726	662	309	322	362	370	401	328	401	404	163
TARBP1_6945	137	122	219	257	195	217	179	171	195	198	142	202	150	128	170	180	156	110	146	186	236	271	284	272	197	197	182	143	187	184	112	106	203	204	96	119	141	134	140	155	144	137	155	174	65	91	74	80	197
TRGC1_6949	0	0	0	0	0	0	0	0	0	0	1	0	0	0	0	0	0	0	0	1	1	0	0	0	1	0	0	0	0	0	1	0	3	0	0	0	0	0	0	0	5	1	1	0	0	0	0	0	1
TATDN2_6963	10	3	13	23	17	18	9	8	10	5	9	22	13	12	7	13	15	10	17	14	19	18	15	16	16	16	10	20	11	23	11	21	20	11	10	7	14	10	20	10	13	11	15	14	16	13	9	10	12
TBC1D10C_6964	0	0	1	0	0	0	1	0	0	0	2	0	0	0	2	1	0	0	0	1	0	0	0	1	0	2	3	0	0	0	0	0	0	0	1	0	1	0	0	0	0	2	1	0	2	0	0	0	2
TBC1D30_6965	2	0	0	0	0	0	0	0	0	0	0	1	0	0	0	0	2	1	0	0	0	0	0	0	0	3	0	0	0	0	0	0	0	0	0	0	0	0	2	1	0	0	0	0	1	1	0	0	0
TBC1D9B_6969	479	463	839	907	623	662	458	490	686	798	728	672	714	514	493	530	585	493	715	616	613	559	610	714	466	496	608	583	616	897	525	547	549	566	410	528	572	462	631	497	683	694	797	596	558	519	383	414	702
TBPL1_6978	80	49	85	57	98	82	49	41	41	66	56	82	36	53	35	41	36	44	58	51	38	31	47	44	46	42	51	41	70	71	33	56	34	40	25	46	29	17	38	37	28	28	67	76	24	31	23	27	65
TBX2_6983	10	4	7	17	5	7	2	6	18	18	7	6	7	13	5	6	7	8	5	4	1	5	2	20	11	8	3	5	8	9	8	1	5	6	14	17	11	9	10	4	12	27	6	12	16	24	9	4	9
TCEA2_6992	15	12	15	21	17	19	12	18	24	19	31	29	50	24	24	17	9	17	35	12	13	12	20	9	12	15	21	38	28	51	13	22	16	10	14	9	8	8	11	9	28	29	46	27	11	27	16	9	26
ELOC_6998	190	180	241	229	271	243	172	179	220	230	167	176	166	144	130	163	186	182	162	158	159	173	251	289	186	197	190	201	192	205	153	144	139	174	140	190	182	191	190	166	212	149	280	294	170	166	124	134	249
TCERG1_7000	71	84	91	114	104	100	61	72	99	111	74	78	76	56	66	76	84	67	74	110	87	94	104	115	74	64	85	100	106	119	87	80	69	105	63	64	77	68	75	74	81	82	94	87	92	71	56	60	116
TCF19_7001	26	23	23	25	56	21	17	10	12	8	22	19	12	15	7	26	21	30	24	19	44	31	56	56	32	26	12	10	24	35	11	19	23	22	26	25	41	31	26	39	22	30	8	15	18	16	21	25	21
TCFL5_7007	61	41	52	55	71	56	30	33	39	74	54	55	54	42	43	27	42	51	85	52	29	32	40	45	41	19	72	56	54	57	31	28	46	41	15	18	20	9	22	18	46	36	23	27	40	45	16	15	70
TCTA_7011	53	52	84	75	53	68	40	35	83	86	50	64	42	37	43	41	35	34	38	33	17	38	35	29	25	23	42	42	42	48	37	29	17	32	31	38	27	37	30	26	47	51	28	28	44	37	23	29	72
TERT_7028	0	0	1	0	1	0	0	1	0	0	0	0	0	0	0	0	0	1	0	0	0	2	0	0	0	1	0	0	0	0	0	0	0	0	1	0	0	0	0	2	0	0	0	1	0	0	0	1	0
TES_7031	39	40	48	54	61	55	22	23	51	63	41	40	39	43	31	22	82	47	39	49	63	46	79	85	51	52	85	53	98	96	34	48	71	64	33	47	103	82	73	83	66	62	306	292	58	52	31	57	74
TESK1_7032	2	6	14	3	9	9	1	4	1	6	8	1	6	7	0	3	1	1	2	6	5	7	4	9	3	6	7	3	6	9	3	6	6	6	7	4	6	1	2	3	4	2	7	3	9	8	3	5	5
TFAM_7036	22	15	22	16	25	16	11	10	12	13	22	24	9	31	12	14	20	18	41	32	20	32	34	26	27	18	15	15	41	46	20	18	23	32	19	17	26	19	26	19	26	15	42	49	22	17	16	16	32
TFAP2A_7039	3	2	11	14	9	9	3	6	3	8	5	5	7	6	13	9	6	3	4	7	7	21	10	12	6	6	4	1	2	2	3	11	9	13	17	10	4	4	11	4	0	3	5	1	5	4	5	13	8
TFDP1_7045	532	479	588	571	630	566	347	314	396	469	445	420	401	337	411	351	500	494	561	544	652	653	749	841	526	549	275	199	639	725	304	352	469	520	306	325	451	427	478	451	436	360	394	372	338	300	289	273	651
TFF1_7046	2	0	0	4	0	0	0	0	0	0	0	0	0	1	0	0	1	0	3	1	0	0	0	1	0	0	0	2	0	0	1	0	0	1	2	0	0	0	0	1	0	1	1	1	0	0	0	2	0
TGFB2_7058	8	6	10	25	18	11	7	6	3	8	13	9	5	11	6	9	10	8	15	7	10	2	8	8	6	7	6	18	10	17	8	9	3	2	0	5	4	1	3	4	11	2	9	9	3	5	5	2	8
TGFB3_7059	97	91	34	64	34	43	18	22	68	69	32	49	33	43	33	30	122	81	86	84	280	354	381	376	222	191	74	51	268	255	86	84	131	174	38	49	92	93	90	90	64	40	64	57	38	29	35	26	120
TGFBR2_7065	442	466	391	337	421	401	197	211	505	587	333	358	303	259	250	235	430	325	327	313	290	326	353	400	201	256	271	204	438	498	147	154	244	241	196	183	337	426	317	326	282	249	351	332	85	76	122	149	891
TH_7069	0	1	0	0	0	4	0	0	0	4	0	0	0	0	0	0	0	0	1	0	0	0	0	2	0	0	0	2	0	1	0	0	0	0	1	0	0	0	0	0	0	0	0	0	0	0	0	0	0
THAP11_7070	0	1	2	5	0	1	0	0	4	0	0	0	2	0	0	0	0	1	2	1	1	2	4	1	1	2	0	0	3	4	0	2	0	2	1	1	4	3	0	0	4	0	0	2	0	0	0	0	0
THBD_7074	0	1	0	0	0	0	0	1	0	0	0	0	0	0	0	0	0	0	0	0	0	0	1	0	0	0	0	0	0	0	0	0	0	0	0	0	0	1	0	0	0	0	0	0	0	0	0	0	0
TIAM1_7096	92	94	83	86	114	105	68	74	96	130	100	106	106	78	70	59	99	72	122	76	70	59	93	88	87	75	142	145	133	153	116	83	47	58	26	34	48	49	77	66	137	120	76	61	148	108	16	8	133
TIMELESS_7100	4	2	5	3	8	7	2	2	2	3	0	1	1	3	2	5	2	3	0	6	10	2	2	13	9	11	1	2	3	4	1	3	9	9	1	1	5	4	2	2	1	1	1	4	1	0	0	3	7
TIMM22_7102	7	8	14	17	2	17	6	2	6	6	9	6	7	8	9	4	3	7	8	18	3	9	10	13	5	4	10	7	10	18	6	6	6	5	5	9	5	8	10	12	12	6	10	10	10	6	4	2	12
TIMM9_7106	5	7	15	4	12	6	0	7	4	6	3	2	5	5	2	6	2	3	7	5	7	3	4	8	13	3	2	0	10	9	1	1	4	6	4	2	4	3	9	2	3	2	9	4	2	5	0	2	11
TIMP1_7107	204	187	367	345	308	315	275	217	245	313	443	430	261	264	247	180	217	250	282	316	403	339	346	340	340	284	350	284	400	396	266	248	302	405	282	324	310	240	379	314	274	314	303	318	352	304	253	272	270
TIMP2_7109	40	47	57	76	89	86	49	50	68	88	99	71	66	56	51	44	48	50	94	66	51	41	58	61	34	33	106	65	53	47	73	51	40	46	28	36	37	26	31	19	65	66	17	24	58	57	27	51	76
TIPARP_7116	232	197	367	449	295	311	255	233	347	373	277	318	275	261	297	242	222	185	222	239	326	331	308	291	211	241	291	269	253	254	257	243	314	350	264	357	321	315	336	325	319	220	331	336	278	252	225	264	300
TJP1_7119	879	819	1417	1508	1304	1282	877	890	1193	1425	944	1047	1177	959	910	977	840	822	952	848	1233	1409	1537	1673	970	947	1162	1073	1193	1425	958	950	1074	1338	1390	1659	1340	1356	1168	1072	1198	1128	1705	1430	1100	1037	1153	1182	1056
TK1_7120	40	51	55	41	72	75	24	31	25	29	36	28	32	30	36	36	41	39	67	38	107	66	134	155	80	80	14	21	87	111	21	22	41	42	41	49	82	76	63	53	26	27	34	20	29	23	21	29	67
TLE1_7124	20	12	33	29	38	31	16	18	21	27	13	28	23	22	29	24	14	15	10	24	20	24	32	34	29	34	18	16	35	25	28	13	29	34	12	22	23	26	38	28	17	18	18	25	24	12	24	19	21
TLR4_7131	5	5	7	17	11	12	2	9	5	6	7	4	12	6	9	13	5	2	8	5	11	15	7	17	7	9	2	6	11	16	10	9	8	17	23	11	36	24	30	36	7	3	32	13	16	12	13	23	10
TM2D2_7135	22	15	25	26	33	24	21	32	29	24	16	23	21	12	11	11	17	14	17	14	23	23	14	25	12	14	21	15	16	22	11	9	11	24	13	24	21	15	23	13	18	18	19	16	20	15	16	10	29
TM9SF2_7142	485	432	919	948	800	777	648	578	699	830	694	662	704	642	512	535	523	529	696	566	763	666	759	801	649	662	865	730	668	824	588	578	672	695	681	895	808	563	625	692	754	670	530	417	699	625	624	681	728
TM9SF3_7143	341	331	507	468	376	401	273	239	513	586	246	286	308	290	339	333	331	327	239	271	293	312	279	344	160	198	493	410	227	203	275	301	253	264	275	301	183	171	94	88	459	370	152	135	321	263	230	266	381
TMBIM6_7153	2344	2620	3376	3953	2888	3118	2274	2650	3307	3546	2552	2875	2559	2301	2442	2481	2684	2345	2627	2534	3013	2910	3103	3218	2216	2045	2621	2339	2382	2432	2132	2123	2163	2424	2747	2897	2730	3002	2275	2159	2901	3070	2529	2251	2442	2325	2079	2270	3191
TMC7_7154	4	1	2	6	3	5	1	2	4	8	5	6	9	2	5	1	6	1	2	6	0	1	5	2	0	4	1	0	6	7	1	1	0	1	0	4	0	0	0	1	9	0	8	3	4	1	1	0	6
TMC7_7155	15	6	11	16	8	19	17	14	18	30	24	28	23	8	12	8	9	12	27	17	3	6	7	10	8	8	14	7	20	18	4	12	4	9	10	0	2	3	11	3	12	15	19	11	6	11	0	1	19
TMC7_7156	1	0	0	1	0	2	1	2	0	2	6	2	3	2	0	0	2	2	3	2	2	0	0	0	2	0	0	1	2	5	0	1	1	0	0	0	1	0	1	0	1	2	3	2	0	0	0	0	1
TMED10_7162	59	35	98	137	136	99	86	67	84	105	108	140	105	100	76	85	72	84	118	81	85	85	81	83	54	56	98	90	76	115	92	74	78	88	59	83	77	63	66	59	106	98	65	74	94	100	76	64	59
STIMATE_7172	3	9	3	15	7	6	4	3	11	13	11	8	15	12	7	4	2	4	6	10	16	20	10	13	8	11	5	3	6	11	5	8	10	15	14	12	11	6	7	19	9	5	7	3	17	9	15	10	5
TMEM128_7178	134	116	229	178	196	215	124	124	160	193	188	171	141	173	143	116	141	109	133	176	139	110	160	152	152	142	216	163	202	218	134	103	146	161	104	130	117	129	145	152	170	132	151	172	147	130	123	130	185
TMEM14C_7183	254	219	282	253	298	283	155	137	200	234	256	268	261	213	181	174	223	230	277	244	285	193	338	382	309	251	380	267	346	414	196	218	210	266	127	168	192	172	158	152	249	241	328	334	215	185	148	151	334
RXYLT1_7211	158	163	224	196	196	202	156	131	204	220	183	202	184	143	154	162	135	148	182	248	227	200	211	190	140	140	193	170	211	250	127	152	197	193	175	208	179	201	133	168	213	186	199	173	177	135	146	196	203
TMEM50A_7213	36	27	57	39	62	43	30	22	28	42	44	40	34	41	23	27	25	25	38	45	88	66	89	116	49	56	60	51	48	64	34	45	89	76	83	90	94	62	88	81	39	37	33	42	70	41	59	65	31
TMEM97_7217	792	719	748	798	788	808	410	401	460	499	489	472	439	363	534	492	608	645	654	682	1282	1323	1176	1218	633	594	547	442	699	859	334	328	727	770	612	662	717	654	624	563	448	438	286	302	358	327	315	379	1104
TMX1_7229	22	6	34	29	46	30	28	16	21	10	28	19	18	21	33	21	16	13	18	10	36	30	56	37	27	21	15	20	16	16	24	22	35	27	50	74	56	33	41	35	14	16	19	23	26	25	36	50	19
TNFAIP3_7232	34	34	66	51	48	66	42	25	80	69	49	35	46	32	55	39	89	80	75	116	1559	1447	1584	1690	1321	1413	2660	1837	475	486	1339	1323	1261	1373	2508	2632	2058	2061	2065	1953	2243	2140	515	597	1821	1590	1812	1901	46
TNFAIP8_7234	25	22	53	39	57	43	30	32	28	40	53	28	40	35	36	39	35	31	42	40	175	219	157	198	124	117	213	201	74	77	166	150	197	190	470	503	277	240	241	201	212	237	60	53	237	270	345	364	31
TNFRSF10B_7241	77	56	84	49	68	80	36	46	71	64	59	89	54	66	49	62	64	65	68	67	136	168	116	162	100	93	115	72	109	136	165	152	141	153	152	151	117	103	112	106	184	161	170	169	231	164	144	126	79
TNFRSF21_7250	70	65	102	115	65	77	26	30	182	185	48	43	128	96	139	104	53	73	124	82	68	55	46	55	37	32	123	124	50	60	63	89	71	69	98	101	63	40	34	41	274	278	94	72	235	240	131	143	98
TNFSF10_7255	10	13	84	63	66	87	52	34	13	18	21	23	11	25	64	57	16	16	11	25	943	949	983	1050	615	640	15	9	58	56	146	130	656	725	1245	1439	1617	1624	1580	1414	12	18	56	52	181	116	718	796	16
TNFSF10_7256	0	0	5	0	5	1	1	3	0	2	5	3	4	3	1	0	2	2	1	2	41	28	54	38	30	30	0	0	1	6	12	11	33	33	39	62	72	45	76	78	0	2	0	7	8	4	31	36	0
TNFSF13_7259	0	0	0	0	0	0	0	0	0	0	0	0	0	0	0	0	0	0	0	0	0	0	0	0	1	0	0	0	0	0	0	0	0	0	0	0	1	0	0	0	0	0	0	0	0	0	0	0	0
TNFSF13_7260	2	0	0	5	1	0	0	4	1	1	4	2	0	0	2	1	1	2	3	1	1	1	1	4	3	5	1	1	2	4	2	2	2	3	4	5	3	2	1	5	2	2	1	0	0	1	0	0	1
TNIP1_7262	291	290	346	302	284	275	182	196	324	359	166	219	209	196	221	186	371	281	195	283	3081	3022	2974	3458	2021	2060	787	672	1208	1034	1283	1137	1735	2034	5998	5887	5535	6802	4033	3884	752	769	856	832	933	889	2265	2423	420
TOMM34_7272	206	182	197	206	170	202	80	119	165	174	119	118	91	104	110	131	155	158	151	193	214	231	233	286	144	154	173	130	194	188	125	138	184	190	133	130	157	178	105	127	166	171	181	169	127	112	118	120	256
TOMM70_7276	81	97	106	110	112	134	66	62	116	130	75	75	80	73	78	76	79	62	75	88	71	117	123	117	58	66	89	102	81	81	68	80	66	70	67	106	87	82	88	64	96	92	125	102	85	78	72	100	131
TOP2A_7277	109	90	128	160	186	234	93	84	83	89	93	110	88	81	75	65	143	105	102	109	83	80	173	189	200	143	113	89	203	191	64	62	71	81	24	48	66	57	82	88	90	87	89	81	63	73	39	38	159
TOPBP1_7280	52	37	67	62	60	63	30	31	48	49	38	63	44	53	52	45	53	70	55	64	103	116	75	110	102	62	68	38	102	87	32	38	71	107	57	59	61	65	57	64	49	39	49	45	47	40	53	61	56
TOR1A_7283	165	126	170	182	173	176	121	130	142	198	151	140	128	118	129	134	132	122	174	140	190	182	247	222	154	160	190	173	205	263	133	119	167	193	137	157	208	157	159	141	154	187	174	158	183	125	117	145	239
TP53_7287	15	5	17	24	17	19	15	10	8	14	15	2	13	9	10	9	9	14	36	17	12	28	21	28	17	16	5	16	16	54	10	9	9	21	9	7	17	12	11	15	24	12	60	24	19	17	10	8	18
TP53BP1_7288	21	15	29	34	20	23	14	12	14	26	31	23	30	41	14	27	16	13	22	24	11	10	14	11	20	10	21	20	16	31	13	17	10	16	12	16	24	12	17	13	14	13	42	30	22	16	15	17	27
TP53I3_7290	60	37	57	88	56	47	34	44	80	84	76	84	52	58	49	54	45	53	69	60	52	40	55	53	46	46	66	65	103	124	46	49	42	39	32	30	33	34	54	38	62	58	69	61	60	56	13	34	65
TPD52L2_7294	11	10	12	18	15	11	17	6	16	21	19	19	18	18	12	20	12	10	22	25	14	17	5	15	16	12	8	14	17	30	12	9	8	15	6	11	7	5	17	16	20	12	25	18	24	9	5	8	9
TPM1_7295	39	39	53	24	25	38	10	5	23	26	31	30	24	32	27	34	36	37	27	34	33	45	39	31	33	21	45	31	78	61	43	28	44	43	22	23	10	9	17	19	49	36	25	32	34	35	20	26	52
TPRKB_7298	10	5	8	5	6	11	2	7	4	10	11	13	3	2	7	5	1	6	11	4	1	5	0	7	3	4	8	3	10	9	3	7	6	10	3	6	2	5	0	5	2	10	10	5	7	4	3	2	6
TPX2_7308	866	815	823	932	1166	1157	579	685	498	591	507	576	514	423	531	555	894	795	731	636	781	746	1133	1355	1151	967	531	490	1035	1257	348	349	619	671	394	511	649	613	625	549	553	477	687	583	414	365	418	432	1188
TRAF6_7314	5	3	9	8	12	8	12	3	11	10	16	8	5	17	3	12	4	2	8	9	6	4	10	15	9	9	9	13	11	18	15	14	7	6	15	6	11	5	9	5	3	11	5	10	8	20	11	10	2
TRAK2_7315	148	117	155	142	121	142	81	100	144	143	136	157	158	125	110	118	130	136	130	146	126	101	76	97	75	51	163	133	163	166	112	95	112	123	61	53	42	41	44	61	135	129	185	167	128	148	57	64	149
TRAM1_7316	353	292	512	605	493	573	310	293	395	520	315	350	393	303	348	284	358	342	366	340	532	558	514	614	343	337	435	439	382	437	359	319	419	423	528	668	558	484	429	389	450	322	330	245	376	381	388	480	440
TRAM2_7319	566	525	411	410	603	501	205	212	405	409	436	477	308	304	309	321	458	551	530	561	423	394	587	597	453	507	492	351	583	637	279	279	380	428	223	319	434	316	349	361	376	339	312	245	233	187	189	169	828
TRAP1_7320	1	2	7	10	5	2	5	2	3	1	2	3	5	4	2	4	1	5	2	2	4	2	5	3	0	1	0	4	4	9	5	3	3	1	0	5	5	0	2	3	4	1	11	8	0	6	4	0	4
TRAPPC3_7327	392	329	422	443	428	432	267	275	420	427	396	377	412	325	266	245	262	317	478	361	286	307	316	345	217	263	375	406	396	622	269	339	283	322	263	325	276	213	217	229	396	421	436	376	359	344	244	308	451
TRIB1_7336	15	17	24	36	25	28	16	17	57	66	18	29	30	25	25	13	8	11	24	17	27	39	40	29	32	32	156	100	24	36	20	26	20	39	55	66	73	56	52	38	394	295	37	47	172	143	54	85	18
TRIB3_7337	131	111	130	203	210	195	102	103	127	142	130	163	96	103	96	108	131	135	94	119	99	95	141	130	76	95	150	140	154	176	104	114	84	85	67	81	116	117	112	83	133	113	2935	2655	92	96	69	53	227
TRIM13_7340	59	64	72	90	91	53	60	53	89	85	99	96	98	94	84	63	73	84	112	82	77	72	67	73	48	54	78	84	88	115	67	72	55	60	28	59	43	47	43	51	60	56	106	72	72	54	51	54	119
TRIM2_7343	131	87	201	139	154	128	108	71	115	158	221	181	110	175	104	103	112	143	190	181	51	40	54	57	65	50	199	117	152	125	77	65	34	48	14	8	14	17	24	31	165	124	81	101	66	59	17	20	143
TSC22D3_7366	30	36	32	49	27	43	43	18	38	44	30	50	40	33	19	28	37	48	61	44	17	23	19	27	28	20	40	35	49	32	22	15	6	18	7	7	18	13	21	26	36	22	109	93	17	15	5	8	45
TSEN2_7367	141	84	157	172	149	157	97	102	116	170	118	147	106	113	99	133	153	116	125	139	94	106	120	108	59	87	165	111	104	132	78	83	75	86	64	65	78	65	68	53	138	106	120	120	76	68	61	56	196
TSKU_7371	234	222	408	446	356	320	240	247	329	365	221	314	290	269	244	229	213	189	166	199	419	442	399	491	299	258	223	186	330	321	199	198	298	323	612	656	587	627	493	436	352	307	274	302	366	323	328	413	311
TSPAN3_7378	22	15	35	22	15	16	9	14	15	28	19	20	13	20	25	16	19	20	35	28	18	15	21	28	14	10	32	17	21	29	18	11	19	21	10	8	14	12	8	9	28	15	33	15	11	21	10	11	33
TSPAN4_7379	0	0	1	4	0	1	1	0	0	4	1	0	2	1	0	0	0	0	0	0	0	0	3	2	1	0	3	1	0	0	0	0	0	1	0	0	0	1	3	0	0	0	0	0	1	0	1	0	1
TSTA3_7382	54	46	77	46	62	57	49	39	54	62	58	66	37	57	58	45	48	44	42	74	72	52	54	60	40	35	72	54	84	53	62	43	60	58	44	50	46	37	41	32	62	63	48	62	57	52	37	47	85
TTK_7394	98	43	89	58	137	138	60	54	49	78	55	53	31	64	57	49	75	89	50	57	85	73	105	94	132	125	76	26	132	85	42	39	50	93	37	36	50	45	64	61	48	32	28	40	39	41	56	39	124
TTR_7397	1	1	2	2	0	0	0	0	1	0	0	2	1	0	1	0	0	0	1	0	2	2	1	2	1	0	2	0	0	1	3	0	1	0	0	0	0	1	0	0	2	2	1	0	2	0	0	0	0
TUBA1A_7398	8128	9466	12710	14662	11608	12769	8604	8963	12377	12205	8264	9516	7984	7086	7935	8042	8261	6571	6954	7462	4483	4332	4245	4675	2895	2409	9910	8646	6299	6900	5386	5157	3919	4493	2853	3055	2395	3037	1976	1635	9272	10005	2351	2014	6110	5475	2907	3392	9870
TUBA1B_7399	1339	1152	1648	1498	1983	2068	1072	950	995	1250	1450	1457	1004	1031	1041	1006	1285	1406	1063	1332	1491	1322	1916	2027	1377	1235	1493	1104	1855	1667	931	939	1174	1406	855	1099	1364	1161	1187	1162	1271	991	637	630	1124	929	849	971	1804
TUBA1C_7400	2	1	0	3	0	4	0	1	2	1	2	3	0	0	1	0	2	0	3	9	1	2	0	2	3	1	0	5	5	5	3	0	0	4	1	0	2	0	3	2	0	0	4	1	2	1	1	0	0
TUBB3_7409	63	59	99	131	142	116	95	94	88	143	101	117	129	97	64	94	51	66	85	72	52	38	79	48	38	45	75	69	53	70	59	55	45	63	36	46	68	52	38	54	94	83	28	17	73	71	40	35	87
TUBB6_7410	120	99	96	96	158	165	70	65	86	84	110	75	111	116	78	84	74	102	204	116	127	129	186	165	115	106	171	184	177	245	140	171	179	220	119	179	184	111	149	114	137	133	108	102	174	183	120	117	129
TWF2_7415	974	1136	1172	1371	1256	1418	871	931	1013	1061	956	1002	908	699	847	774	1120	883	948	1007	1061	1104	1326	1460	1157	1124	885	742	1714	1815	650	680	850	939	1245	1423	1567	1676	1363	1257	962	1005	1753	1619	786	717	697	775	1390
TWIST1_7416	49	32	33	44	46	61	26	37	48	45	40	48	31	23	30	23	35	33	33	28	33	43	40	59	32	29	101	78	33	49	33	36	30	41	36	49	35	47	43	33	66	53	35	41	39	22	20	25	68
TXLNA_7419	595	539	992	916	798	842	560	557	764	876	729	787	616	641	575	599	646	595	665	673	823	876	905	1044	738	748	687	496	861	891	493	420	587	679	786	886	880	787	869	711	750	704	786	802	680	582	582	603	805
TXLNGY_7420	0	0	0	0	0	0	0	0	0	0	0	0	0	0	0	0	0	0	0	0	0	0	0	0	0	0	0	0	0	0	0	0	0	0	0	0	0	0	0	0	0	0	0	0	0	0	0	0	0
TXNDC9_7433	313	295	336	452	362	360	245	222	358	342	308	310	279	264	261	235	296	288	316	249	328	329	365	408	249	268	398	290	367	443	257	264	272	330	276	291	326	309	292	251	344	341	335	344	316	266	257	261	450
TXNL4B_7437	590	545	1017	1155	929	1019	678	725	950	1033	608	728	709	705	767	664	673	534	573	661	824	862	940	1020	611	606	650	583	599	700	541	516	629	604	1320	1499	1092	1272	853	848	846	841	1169	1007	943	874	861	963	826
TXNRD1_7440	121	68	139	124	177	125	66	63	97	155	164	136	151	118	90	91	83	149	192	149	157	153	172	160	95	77	238	185	131	182	187	191	223	260	86	119	96	64	61	64	151	129	508	486	137	104	95	93	174
TYROBP_7448	1	0	1	0	0	0	0	1	0	0	0	1	0	0	0	0	0	0	0	0	0	0	0	0	1	0	0	0	0	2	0	0	0	0	0	0	0	2	0	1	3	0	1	0	2	0	0	0	0
UBA3_7456	100	97	177	199	163	177	119	114	162	184	164	165	145	150	114	121	138	107	129	185	138	148	180	168	146	113	138	128	174	181	135	95	127	135	114	129	112	130	130	109	157	154	171	142	177	144	110	117	168
UBE2G1_7477	427	425	449	580	502	453	256	306	366	492	432	436	406	372	316	309	329	353	413	378	330	354	366	348	284	243	640	467	570	686	415	442	257	304	178	201	161	177	179	170	404	442	484	355	422	403	180	216	582
UBE2L6_7483	633	637	4515	5864	4618	4708	3475	3714	1548	1491	2707	2759	1844	1553	2538	2378	817	745	678	664	4356	4057	6139	6874	4422	4362	671	631	1255	1541	1165	1146	2206	2553	3551	3803	4663	4889	3881	3645	1306	1373	2778	2264	1653	1635	1909	2265	889
UBE2Q2_7491	728	708	940	1104	846	943	552	625	887	1001	632	712	711	621	598	628	730	572	605	607	659	702	766	866	543	588	932	944	801	821	694	615	504	602	512	616	537	641	519	447	947	750	766	672	674	665	420	460	961
UBE2T_7492	205	174	169	139	233	275	94	78	96	96	73	87	39	48	131	118	184	144	41	117	225	197	400	428	199	216	117	68	133	102	49	50	83	95	67	67	134	175	119	134	97	88	57	68	52	40	47	43	230
UBE2V2_7495	353	271	405	463	507	553	239	236	396	430	216	248	221	237	258	297	306	323	180	300	374	406	489	501	244	205	413	325	357	281	220	229	283	310	365	386	379	370	205	193	370	315	208	249	215	261	235	300	376
UBE3C_7502	25	16	16	25	20	35	6	8	16	13	31	25	22	14	9	16	17	19	41	30	30	24	11	18	24	14	27	16	39	47	9	31	18	27	12	13	30	11	15	18	12	22	60	34	25	27	18	17	30
UBQLN2_7511	101	110	150	174	173	174	115	129	123	137	174	160	170	124	145	104	105	127	137	150	144	186	160	150	119	111	152	127	153	173	132	106	149	130	150	146	122	118	116	125	156	149	160	157	139	167	93	137	159
UBR7_7515	347	318	437	507	451	459	234	280	316	393	354	322	291	276	355	326	341	316	402	370	510	510	472	591	326	324	345	274	435	545	251	251	393	420	228	233	277	237	309	265	356	343	262	211	255	269	252	224	513
UCHL1_7516	2944	2952	3982	3611	3253	3611	2115	1950	3515	3281	2436	3108	2034	2355	2370	2423	3042	2811	1781	2862	2735	2588	2819	3086	2328	2164	3603	2506	2853	2012	2117	2178	2172	2607	2167	2353	2111	2232	1902	1809	3466	3421	3735	4199	2612	2260	1899	2006	3714
UFM1_7522	611	522	858	858	680	807	508	490	731	821	587	726	559	593	518	545	566	497	521	660	786	810	652	732	505	483	958	684	665	616	648	608	780	832	716	823	598	577	517	444	803	576	853	978	720	612	628	676	752
UGDH_7525	1049	965	1286	1377	1520	1471	949	1028	1146	1309	944	1072	969	966	1023	1038	1085	978	783	1015	1398	1583	1562	1649	1026	996	1600	1280	1433	1322	1295	1246	1482	1779	1299	1655	1343	1515	1164	1095	1502	1346	1317	1366	1335	1249	1512	1653	1490
UGT1A1_7531	0	0	0	0	0	0	0	0	0	0	1	0	0	0	1	2	3	0	0	0	0	1	0	0	0	0	1	2	0	0	0	0	0	0	0	0	0	0	0	0	0	0	0	0	0	0	0	0	0
UGT1A4_7535	0	0	0	0	0	1	0	0	0	0	0	0	0	0	0	0	0	0	0	0	0	0	1	0	0	2	0	0	0	0	0	0	0	1	1	0	0	0	0	0	0	0	0	0	0	0	0	0	0
UGT1A5_7536	0	0	1	0	0	0	0	0	0	0	0	0	0	0	0	0	0	0	0	0	0	0	0	0	0	0	0	0	0	0	0	0	0	0	0	2	1	0	0	0	0	0	0	0	0	1	0	0	0
UGT1A7_7542	0	0	0	0	0	0	0	0	0	0	0	0	0	0	0	0	0	0	0	1	1	0	0	0	0	0	0	0	0	0	0	0	0	0	0	0	0	0	0	0	0	0	0	0	0	0	0	0	0
UGT1A9_7544	0	0	0	1	0	0	0	0	0	0	2	0	0	1	0	0	0	0	0	0	1	1	1	0	0	0	0	0	0	0	0	0	0	0	0	1	1	1	0	0	0	0	0	0	0	0	0	0	0
UGT2B7_7548	0	0	0	0	0	0	0	0	0	0	0	0	0	0	0	0	0	1	0	0	0	0	0	0	0	0	0	0	0	0	0	0	0	0	0	2	0	0	0	0	0	0	2	0	0	0	0	0	0
UNC50_7554	1116	1008	1742	1780	1452	1545	1166	1046	1523	1745	1051	1256	1161	964	1181	1236	1288	1136	1120	1253	1133	1249	1362	1453	1179	1134	1507	1206	1211	1327	874	767	928	1069	1125	1259	974	1047	993	940	1322	1235	1190	1037	823	809	791	874	1529
UQCRFS1_7566	331	359	379	406	338	382	213	254	286	397	201	314	270	237	298	286	348	269	273	333	317	305	315	377	217	222	324	308	333	270	256	273	269	272	236	298	267	314	182	240	278	286	300	274	280	239	234	225	457
UQCRQ_7569	341	252	351	354	386	378	223	197	328	298	361	349	315	279	241	241	299	275	282	347	234	266	263	288	219	194	316	245	380	322	234	253	243	285	195	206	149	158	167	157	320	293	224	225	320	270	195	189	364
USO1_7576	241	158	352	348	345	366	209	208	204	290	156	201	165	206	258	235	249	249	144	236	365	374	347	378	244	292	375	219	253	170	305	266	409	451	435	638	362	380	333	311	373	342	192	297	326	341	425	516	219
USP1_7579	44	42	79	63	91	98	16	16	49	49	20	37	23	23	40	32	39	45	29	35	86	74	82	108	56	57	48	41	47	25	29	22	71	57	45	56	62	53	54	60	39	24	50	44	35	36	53	46	44
USP14_7582	1862	1764	2476	2681	2409	2593	1386	1528	2102	2107	1604	1757	1734	1616	1887	1860	1939	1607	1544	1764	2790	2732	2581	2755	1842	1771	2650	2081	2173	2130	2022	1934	2211	2586	4376	4630	3006	3492	2524	2400	2211	2151	2204	2060	2565	2404	3282	3852	2858
USP18_7584	200	176	630	607	807	796	426	447	319	308	381	399	396	366	459	404	251	221	225	260	3899	3802	4456	4820	2979	2850	128	105	208	225	1069	969	3250	3567	3921	4291	4345	4338	3691	3435	271	185	537	425	970	873	2725	2876	233
USP22_7587	270	258	307	369	282	324	240	255	321	332	339	344	360	246	187	193	275	259	455	292	229	226	243	282	176	169	179	193	451	662	192	228	209	267	98	110	192	151	125	147	305	314	319	238	278	237	120	139	424
USP6NL_7599	46	29	61	83	44	70	47	39	40	43	69	60	73	49	40	40	36	36	124	51	47	62	75	60	54	39	49	60	41	121	38	53	60	70	50	56	76	50	67	55	43	50	109	57	59	57	40	40	56
USP7_7602	303	264	306	372	380	389	238	212	276	354	235	280	217	259	212	250	264	219	246	268	319	342	397	433	267	256	233	227	348	414	267	252	265	322	304	327	380	394	331	348	327	324	344	304	303	336	261	278	400
USP9Y_7605	0	0	0	1	0	0	0	0	0	0	0	0	0	0	0	0	0	0	0	0	0	0	0	0	0	0	0	0	0	0	0	0	0	0	0	0	0	0	0	0	0	0	0	0	0	0	0	0	0
UTP14A_7606	51	44	56	60	33	32	35	26	53	34	40	48	42	32	30	26	30	36	53	64	72	47	76	64	37	33	57	48	55	74	43	45	61	65	38	33	50	45	38	37	47	43	86	60	35	44	28	43	46
VAMP2_7615	110	113	194	197	131	144	115	132	144	184	166	129	158	114	99	110	122	114	170	139	85	75	119	124	106	80	160	123	146	189	82	105	72	90	70	92	96	55	111	89	152	110	153	109	107	97	50	68	178
VAMP7_7620	711	680	861	1038	844	851	566	560	735	880	728	756	711	630	647	611	700	594	757	770	576	632	683	706	513	494	901	792	758	973	557	615	564	649	515	535	518	475	462	389	785	732	766	645	631	586	403	534	964
VAPB_7621	108	78	130	142	129	133	88	87	112	177	115	114	102	102	102	116	136	114	104	118	93	105	98	130	73	57	102	106	148	109	75	91	68	96	40	59	63	46	52	54	123	76	82	67	91	89	58	73	142
VAT1_7625	24	32	27	59	42	37	19	19	43	44	45	45	38	61	31	28	42	42	45	43	22	29	7	9	14	5	37	43	53	39	27	27	26	27	10	28	10	6	6	1	52	44	30	21	44	44	21	27	66
VAV3_7626	3	1	3	1	5	2	1	2	0	0	3	4	2	3	3	2	0	2	5	2	0	0	0	1	4	1	1	4	5	7	0	0	0	0	1	0	2	1	0	0	1	1	0	3	0	1	0	0	2
VBP1_7629	36	17	52	35	51	39	18	24	29	21	40	59	30	26	23	28	33	34	46	40	38	34	36	49	37	28	36	32	38	30	19	28	30	48	25	26	15	19	24	17	44	18	42	34	33	30	26	47	44
VEGFA_7645	0	0	0	0	0	3	0	1	0	0	0	0	0	0	0	0	0	0	0	0	0	0	0	0	0	0	0	2	0	0	0	0	0	0	1	0	0	0	0	0	0	0	2	0	0	2	0	0	0
VIM_7657	3366	2960	6314	5814	6158	5759	3697	3391	4684	4829	5168	4915	4608	4453	3547	3585	3251	3319	4314	4350	4282	3449	3893	3978	2443	2421	6110	4598	3606	4020	3796	3835	3765	4410	4174	4877	5129	3759	3476	3201	5168	4689	2333	2295	5068	4330	3369	3911	4562
SELENOS_7660	73	53	98	102	95	58	67	70	62	90	82	100	90	91	66	70	80	71	91	57	88	86	91	105	53	61	62	74	66	99	97	77	122	145	110	154	102	84	124	104	112	80	89	73	103	131	122	122	98
VPS28_7671	53	41	71	62	45	70	48	28	53	62	70	58	46	58	42	37	33	38	61	75	54	30	30	37	22	45	42	28	63	60	44	42	46	71	46	62	38	33	30	32	44	55	50	78	62	53	36	55	71
VPS72_7688	602	559	645	737	602	673	454	412	588	620	485	565	422	366	432	428	527	504	534	541	545	575	612	698	409	411	496	477	617	579	371	411	408	545	342	385	441	492	360	326	522	494	622	548	422	361	321	347	671
VTN_7690	1	0	2	6	0	0	0	1	0	0	0	0	3	0	0	0	1	0	0	0	0	0	0	0	0	1	0	0	0	2	0	0	0	0	1	1	0	1	0	0	2	0	1	0	0	1	0	0	0
VWF_7691	2	0	0	0	0	0	0	0	0	1	3	1	0	0	0	0	0	0	1	8	0	0	0	0	1	0	0	1	1	0	0	0	0	0	1	0	0	1	0	0	0	0	1	0	0	0	0	0	0
WASF3_7695	60	58	69	63	59	58	43	37	62	75	47	60	54	49	41	41	63	54	72	66	47	56	56	66	25	46	72	48	64	56	54	57	52	39	14	20	15	24	18	16	70	50	59	72	54	32	22	9	83
WDR43_7707	935	863	852	1068	965	1067	462	432	1043	1165	622	653	835	654	618	703	692	661	667	655	1236	1346	1294	1318	684	628	1527	1417	1180	1308	875	903	974	1218	875	939	967	1098	600	574	1427	1333	1889	1587	805	789	648	680	1262
TBC1D31_7713	9	9	11	2	14	6	14	5	4	9	4	4	12	4	7	9	17	12	8	12	9	5	7	19	1	9	9	10	13	10	1	2	12	2	2	2	5	3	2	0	11	6	12	13	8	4	3	4	12
WDR7_7716	76	53	86	52	98	78	51	30	90	82	60	69	44	67	72	83	64	49	20	72	59	60	64	80	51	52	103	58	61	41	52	44	47	59	47	57	28	38	57	43	86	56	20	75	58	44	42	41	94
WDTC1_7722	46	38	55	70	44	51	57	46	42	51	68	38	57	30	36	29	35	37	65	40	24	22	30	28	33	37	17	28	40	114	42	57	27	46	24	26	47	26	21	28	35	72	51	31	42	49	28	23	35
WFS1_7723	8	16	7	16	10	10	4	12	16	9	15	10	17	5	12	7	7	4	14	9	9	6	13	10	7	3	11	4	8	27	8	7	5	10	11	4	6	4	7	5	7	14	9	2	10	10	2	9	9
WIPF2_7724	30	27	46	45	39	52	30	21	29	42	70	47	46	29	25	35	23	31	31	40	16	10	30	26	19	30	34	4	43	47	27	23	18	13	9	20	34	14	29	24	29	29	34	43	21	32	16	17	43
WNT4_7736	0	1	0	0	0	1	1	1	0	0	0	0	0	0	0	0	0	1	0	2	0	0	2	0	0	0	0	0	0	0	0	0	0	0	0	0	0	0	0	0	0	0	0	0	1	0	0	0	0
GET1_7746	66	55	112	101	111	94	65	54	104	127	101	121	113	119	84	86	78	87	87	137	49	45	34	34	32	42	150	98	79	65	90	81	61	95	27	41	23	19	22	19	132	86	54	50	115	68	50	58	97
XBP1_7759	33	27	39	51	52	52	21	42	32	38	42	45	30	18	37	37	43	35	64	67	49	30	47	43	34	50	85	74	41	67	52	61	65	84	63	79	70	57	45	48	55	44	86	119	42	53	105	95	29
XPC_7774	231	201	355	389	336	334	216	256	314	441	278	321	252	261	252	240	243	242	365	317	251	259	328	422	270	276	196	153	348	471	137	172	176	210	153	182	207	186	248	234	251	202	460	373	166	163	137	134	340
XPNPEP1_7775	327	364	495	564	522	571	298	322	456	510	284	364	331	283	378	404	322	273	269	331	462	509	487	630	300	299	338	320	363	424	300	235	314	347	714	780	785	835	579	616	432	365	291	296	397	373	403	438	440
XPO7_7779	69	71	101	74	122	105	93	65	86	96	100	78	70	72	88	78	90	92	56	93	78	68	73	105	62	66	125	66	82	85	51	44	68	62	46	48	56	34	62	56	90	64	83	70	82	75	48	43	96
XRCC1_7782	195	212	299	344	311	308	207	190	231	325	189	215	213	152	158	180	249	195	196	203	352	366	419	437	329	296	200	191	284	304	207	157	226	269	256	252	310	331	287	256	261	225	174	171	154	144	146	135	287
XRCC5_7786	310	341	358	546	391	493	264	315	393	508	256	333	291	236	290	269	360	270	362	295	360	388	375	472	247	227	320	288	356	405	265	242	253	277	193	198	210	269	161	175	366	323	259	203	275	242	165	209	467
XRN2_7788	144	96	184	268	182	187	122	131	135	156	217	186	184	143	131	125	109	143	242	177	205	203	220	244	192	163	167	183	237	340	131	151	177	181	127	137	176	120	135	132	190	167	203	154	158	139	124	109	194
YIPF5_7795	10	22	16	16	21	22	17	17	20	28	22	29	15	20	13	13	13	22	9	27	13	9	10	13	19	13	22	22	35	22	29	13	17	22	14	16	16	23	13	13	13	27	26	26	9	17	16	14	16
YKT6_7796	79	57	112	117	125	101	84	52	104	109	105	95	90	85	80	73	69	80	119	104	75	78	69	92	79	59	86	104	127	120	78	78	91	111	68	82	63	51	40	70	112	83	118	107	94	94	53	78	151
YME1L1_7799	384	370	569	689	496	575	304	335	376	510	397	414	441	313	384	365	394	355	518	419	624	622	669	722	387	392	542	547	467	630	420	469	509	610	615	691	688	519	357	432	505	495	694	501	431	396	475	553	510
YTHDF1_7805	29	26	40	33	38	33	23	16	51	48	41	19	47	35	34	8	20	32	50	28	33	24	38	48	27	31	19	27	44	55	29	32	19	41	17	24	37	32	22	13	27	33	44	34	55	24	24	21	30
ZDHHC6_7833	100	97	126	132	109	146	80	65	90	126	91	97	88	79	74	88	107	69	107	94	135	133	128	133	95	84	120	93	100	116	91	68	95	108	99	162	116	117	114	131	117	94	111	88	67	83	103	96	114
ZMIZ1_7853	48	27	43	58	60	60	52	33	34	31	42	55	28	37	32	31	46	40	43	46	39	20	34	37	38	46	39	22	54	67	30	28	33	43	26	30	33	25	34	33	35	58	52	56	52	30	32	19	63
ZMYM2_7861	4	3	3	4	3	2	3	1	1	3	3	4	2	4	0	3	1	3	6	2	3	2	2	2	10	2	6	3	2	1	1	0	0	2	3	0	3	4	1	1	2	5	4	2	2	1	0	1	3
ZNF114_7862	0	9	2	4	2	4	1	4	9	12	4	5	6	6	2	5	1	9	4	5	2	2	5	3	2	2	2	6	9	6	9	2	0	1	0	2	3	5	3	1	3	3	1	5	6	2	1	4	2
ZNF131_7863	87	68	85	97	99	85	59	90	92	123	74	99	85	70	65	48	84	78	72	64	68	92	97	138	65	83	95	64	108	118	87	66	67	73	46	48	60	79	70	63	102	87	102	115	72	89	35	48	123
ZNF165_7867	11	16	19	15	26	12	8	24	13	17	15	18	17	7	14	5	11	15	15	4	3	3	8	12	13	19	13	13	15	7	5	4	3	3	4	4	4	3	9	2	13	10	10	10	5	4	2	7	8
ZNF274_7885	61	61	88	91	99	92	71	70	80	87	55	95	55	54	63	43	66	53	65	56	85	108	140	131	105	97	76	42	94	120	57	61	59	83	63	113	116	128	127	103	60	54	158	118	53	57	41	48	92
ZNF318_7889	1	0	4	4	3	4	2	3	1	3	5	3	3	1	2	3	3	1	9	0	2	5	2	4	2	4	5	1	6	3	0	0	2	2	3	0	1	1	1	2	0	3	4	0	1	0	2	1	1
ZNF395_7894	1	3	7	4	5	4	8	6	3	0	5	7	6	3	0	1	3	4	10	5	3	2	5	4	2	1	1	1	11	11	1	0	1	0	1	9	1	5	0	3	1	4	5	4	0	2	0	1	7
ZNF451_7904	0	3	0	2	4	1	1	0	1	0	3	3	1	6	0	0	0	1	0	2	3	1	4	4	3	4	7	0	2	2	3	1	0	6	0	0	1	5	0	2	9	2	3	2	2	1	2	2	4
ZNF555_7905	1	0	2	0	0	0	1	0	2	3	2	2	1	4	2	0	0	0	2	1	1	0	0	1	1	0	0	0	2	6	1	1	0	1	0	0	0	0	0	0	3	1	0	3	0	6	0	0	4
ZNF586_7908	31	32	18	32	36	34	28	36	50	48	36	26	39	21	27	43	52	29	38	38	25	31	38	45	22	23	31	45	36	33	22	30	13	22	36	25	24	27	24	39	38	34	29	22	17	19	17	17	37
EIF1_10459	1813	1604	2294	2548	2200	2403	1258	1492	2118	2316	1415	1521	1624	1505	1565	1583	1641	1484	1468	1676	1736	1796	1925	2017	1163	1044	2803	2407	1808	1928	1689	1767	1539	1875	2310	2277	1745	2089	1489	1277	2505	2431	3296	3279	2086	1894	1618	1790	2489
CNKSR3_10480	98	83	109	135	95	106	66	65	75	124	104	105	101	75	64	60	95	79	81	96	114	128	119	132	108	109	170	181	108	174	200	207	90	108	165	192	148	123	152	140	136	116	153	126	162	159	109	132	125
NHP2_10492	286	240	327	335	347	299	184	170	271	302	234	283	246	196	202	195	260	263	276	271	234	211	281	245	152	148	220	168	307	307	160	194	216	233	161	168	167	151	126	119	280	266	274	242	239	199	161	162	389
HSD3B2_10507	0	0	1	0	0	0	0	0	0	0	0	0	0	0	0	0	0	0	0	0	0	1	0	0	0	0	0	0	0	0	0	0	0	0	0	0	0	0	0	0	0	1	0	0	0	0	0	0	0
MAGEA2_10525	0	0	0	0	0	0	0	0	0	0	0	0	0	0	0	0	0	0	0	0	0	1	0	0	0	0	0	0	0	0	0	0	0	0	1	1	0	1	0	0	0	0	1	2	0	0	0	0	0
STMN2_10543	0	1	0	0	0	0	0	0	0	0	0	0	0	0	0	0	0	0	0	1	0	0	0	0	1	0	0	0	1	0	0	0	0	0	0	1	0	0	0	1	0	0	0	0	0	0	2	0	0
BRD3_10545	563	530	740	945	698	662	567	534	684	749	559	593	567	498	584	483	630	613	655	620	629	649	719	737	557	487	435	403	830	890	473	433	492	574	308	382	458	451	459	468	625	596	690	548	463	436	255	275	803
FBXO5_10555	767	652	893	888	1021	1029	493	504	543	608	382	505	396	391	602	559	731	603	427	650	1179	1208	1630	1715	933	953	400	319	774	685	342	283	609	692	444	484	698	781	754	708	461	387	356	347	301	265	352	327	1034
KRT7_10561	2	2	0	0	0	2	0	0	1	0	1	2	0	0	0	0	0	0	1	0	1	0	1	0	1	3	0	0	4	1	0	1	0	0	0	0	0	1	0	2	0	0	6	3	1	0	0	1	3
PHOX2B_10580	0	0	0	0	0	0	0	0	0	0	0	0	0	0	0	0	0	0	0	0	0	0	0	0	0	0	0	0	0	0	0	0	0	0	0	1	1	0	0	0	0	0	0	0	0	0	0	0	0
TNFAIP8_10589	68	88	149	131	96	100	78	69	87	86	67	67	102	107	91	102	73	76	81	103	461	455	356	399	317	287	501	398	155	193	419	387	416	468	952	1110	607	668	541	521	491	481	134	107	629	536	716	863	99
SCARA3_10615	471	433	591	736	574	580	370	410	628	828	819	728	726	591	453	417	588	528	898	658	464	410	464	505	388	320	569	576	466	707	561	603	471	502	282	253	292	192	256	230	653	700	285	223	628	617	289	320	695
SGK2_10628	8	11	21	15	8	15	13	6	14	25	18	15	8	11	9	12	11	16	11	8	9	14	6	8	1	4	14	12	9	11	7	9	10	7	2	3	4	5	7	1	6	10	8	9	11	5	8	10	19
SLFN12_10631	40	42	88	53	96	57	42	43	42	37	28	37	50	37	47	60	51	54	27	51	131	147	160	151	114	111	114	91	93	54	104	91	121	122	114	183	124	118	130	86	62	49	28	50	95	88	102	100	38
GSTM1_10645	19	13	32	27	26	35	19	21	29	45	46	29	15	25	26	22	20	26	41	20	17	18	22	14	14	16	29	35	22	33	28	34	15	25	14	16	10	18	5	18	34	30	17	21	30	22	14	27	44
GDF9_10651	0	0	0	2	0	0	0	0	0	0	0	1	2	1	0	1	0	0	0	1	0	0	0	0	0	0	0	0	0	0	0	0	0	0	0	0	0	0	0	1	0	0	0	0	0	0	0	0	0
RNASE6_10652	0	0	0	0	0	0	0	0	0	2	0	0	0	0	0	0	0	0	0	0	0	0	0	0	0	0	1	0	0	0	0	0	0	0	1	0	0	0	0	0	0	0	0	0	1	2	0	0	1
ANP32E_10658	1887	1764	1900	2708	2385	2704	1648	1642	1510	2097	1551	1393	1511	1329	1489	1488	1853	1788	1772	1801	2056	2485	2834	3599	2623	2505	1152	838	2577	2493	1502	1548	1682	1946	1282	1679	1610	2023	1457	1317	1829	2247	1583	1418	1232	1102	881	986	2350
TIMMDC1_10676	219	235	349	449	395	415	258	298	307	360	369	356	340	287	259	228	243	278	324	305	224	231	249	288	205	203	327	294	334	426	226	222	194	183	208	239	232	223	204	197	295	268	381	362	235	267	214	198	321
SOS1_10682	26	11	40	32	61	40	30	28	25	27	48	43	40	31	32	32	17	18	37	26	32	22	40	39	27	37	30	43	30	55	28	28	36	42	19	31	34	26	28	26	32	13	26	40	42	34	25	20	26
PSAT1_10692	81	68	81	73	92	93	49	29	71	79	77	84	45	75	63	37	60	69	40	78	44	38	52	57	36	37	85	62	90	55	49	37	37	52	15	17	16	16	20	46	92	67	382	512	49	30	34	27	96
IGSF6_10705	0	0	0	0	2	0	0	0	0	0	0	0	0	0	0	3	0	0	0	0	0	0	0	1	0	0	2	0	0	1	0	0	2	0	0	1	0	1	0	0	0	0	0	0	0	0	0	0	0
CEBPB_10745	143	134	680	711	539	580	457	508	479	446	253	241	387	374	487	423	203	198	170	206	511	441	649	663	709	735	140	100	405	461	220	217	276	317	976	1009	1006	1070	1242	1250	529	454	987	909	498	470	536	588	212
MS4A4A_10754	0	0	0	0	1	0	0	0	0	0	0	0	0	0	0	0	0	0	0	0	0	0	0	0	0	0	0	0	0	0	0	0	0	0	0	0	0	0	0	0	0	0	0	1	0	0	0	0	0
RANBP2_10755	6	3	1	8	6	4	2	2	1	1	6	1	6	0	0	5	0	2	3	3	8	0	5	3	2	5	3	12	4	9	4	3	0	1	0	1	2	0	0	1	2	4	9	2	0	0	0	1	5
GPR87_10766	3	1	3	3	1	0	0	0	0	1	0	1	0	0	0	0	1	1	2	2	1	0	1	2	1	3	0	2	3	2	0	0	0	1	1	0	0	1	0	0	0	1	2	1	2	0	3	0	2
MARCKS_10769	18	13	25	25	7	14	9	6	12	13	9	12	21	28	9	7	16	18	15	23	13	13	13	19	14	19	4	2	30	22	4	14	13	12	25	36	23	14	21	25	14	15	9	8	30	14	13	18	24
CYP1A1_10775	1	1	0	1	0	1	0	0	1	0	1	3	0	0	3	2	1	0	2	1	7	5	6	5	7	4	2	0	6	4	0	3	4	4	5	5	7	1	4	0	2	1	4	2	2	3	4	2	0
GPAT3_10783	17	18	13	23	15	30	9	18	14	19	18	26	22	12	7	23	27	20	38	33	3	11	18	13	5	10	12	14	25	26	4	2	3	11	2	2	6	3	7	8	7	10	49	46	0	10	2	0	21
CRIM1_10788	5385	5489	5147	6450	5512	5338	2199	2334	4414	4212	2216	2351	3434	2789	3832	3975	4250	3898	4442	4487	13571	13065	9412	9876	4891	4475	8860	7818	2607	3415	7134	7477	9869	10926	14742	14813	10605	11014	5182	4529	7332	8038	4579	3942	6072	6186	7836	8758	7546
KRT19_10816	0	0	4	0	0	0	0	1	0	0	0	0	0	0	0	0	0	1	0	0	0	0	0	1	0	0	0	0	0	0	0	0	0	0	0	2	0	0	0	0	0	0	0	1	0	0	0	1	0
MMADHC_10852	431	423	519	550	529	576	314	302	405	484	331	355	397	283	316	331	453	368	376	382	477	508	544	587	429	414	564	448	494	618	342	308	428	472	496	566	505	536	479	397	463	415	594	495	366	341	334	395	595
IGFBP1_10877	0	0	0	0	0	0	0	0	0	1	0	0	0	0	0	0	0	0	0	0	0	0	0	1	0	0	1	0	0	0	0	0	1	0	0	2	0	0	0	0	0	0	1	1	0	0	0	0	0
ASS1_10887	71	62	71	96	75	78	56	41	64	99	95	92	72	72	55	47	92	76	107	86	86	74	88	90	107	83	70	34	117	107	86	88	96	91	71	90	132	99	146	153	108	93	180	186	97	63	51	63	75
SEMA6A_10899	71	57	111	159	161	135	135	103	150	179	144	126	153	118	77	82	67	71	107	94	67	71	59	64	65	41	135	108	115	177	45	43	28	52	22	29	42	25	43	46	137	123	96	61	102	83	25	23	74
F2R_10901	7	5	6	4	5	9	5	4	8	10	9	14	6	13	1	4	11	10	10	12	15	10	7	7	3	4	10	6	14	9	11	4	11	14	2	7	3	5	0	4	7	9	2	3	4	5	4	4	7
CRABP2_10904	11	5	7	10	4	8	8	7	14	9	8	8	8	14	9	1	14	17	10	11	15	7	8	14	7	2	1	6	10	8	18	16	14	7	5	6	9	10	5	1	5	9	12	5	5	7	13	4	11
EMG1_10916	9	9	6	5	10	11	4	11	9	17	8	10	14	4	5	8	14	8	8	14	6	5	8	7	2	6	11	11	6	5	8	7	2	4	4	6	8	5	6	6	10	12	12	5	7	6	11	8	19
PSMA4_10918	631	487	1498	1752	1646	1628	843	778	582	667	832	857	817	660	845	922	510	604	769	704	1386	1186	1549	1623	1038	995	751	662	946	1123	714	714	1098	1213	1173	1604	1440	1131	1228	1171	742	636	1414	1160	936	821	944	1142	748
WDR3_10929	331	349	293	420	324	461	241	276	327	411	331	229	353	319	374	327	369	327	439	387	382	483	317	446	342	222	490	406	503	378	338	332	370	457	235	285	224	363	177	154	446	484	417	413	286	232	221	204	491
HLA-DMB_10963	10	10	172	168	186	151	157	167	25	33	143	174	18	24	57	57	12	13	10	12	10	11	10	1	5	6	27	27	10	10	21	22	9	10	25	27	62	41	37	54	19	16	46	29	22	21	17	25	20
ORMDL3_10971	147	134	232	224	205	211	144	140	180	219	177	187	183	141	182	184	172	153	157	193	217	175	204	175	160	190	265	206	206	200	155	173	135	210	451	533	448	434	492	386	230	201	115	106	271	188	264	294	202
HES5_10979	5	4	33	11	19	17	23	25	52	68	6	12	50	34	24	23	12	7	4	11	5	3	6	2	0	0	2	3	5	5	5	2	3	0	2	1	10	3	7	2	9	16	4	2	10	6	1	5	4
LCE1E_10980	0	0	0	1	0	3	0	0	0	0	1	1	0	0	1	1	0	0	0	1	2	0	0	1	0	0	6	0	0	1	0	0	1	0	2	1	2	0	0	4	1	3	0	0	1	2	0	0	1
TRPC6_10988	0	0	0	0	0	0	0	0	3	2	0	2	0	0	2	0	0	0	0	0	0	0	0	0	0	0	2	0	0	0	0	2	0	0	1	0	0	0	0	0	0	0	0	0	0	0	0	1	0
FCER1G_11058	6	5	5	9	12	6	0	2	6	16	2	4	5	4	4	1	6	4	1	3	7	4	6	6	7	2	12	5	3	8	6	13	5	4	6	7	2	4	4	3	5	4	4	6	6	8	6	5	13
F2RL2_11064	8	3	3	6	13	5	3	10	8	3	5	8	2	8	3	5	2	1	6	7	9	7	14	8	8	6	1	1	3	9	6	4	4	5	2	0	8	3	10	9	4	0	2	4	3	3	0	1	3
MPDZ_11090	165	168	223	220	161	206	150	146	201	271	210	206	204	190	151	141	143	155	191	197	120	105	111	109	92	93	285	184	197	203	151	130	105	113	69	97	64	67	68	59	180	185	121	110	163	162	116	80	253
FOXE3_11091	0	0	0	0	1	0	0	0	1	2	0	0	0	0	0	1	0	0	2	0	1	0	2	0	0	0	1	0	0	1	1	0	0	0	1	1	0	0	1	1	0	0	0	0	3	4	0	1	0
OLIG2_11096	0	0	0	1	0	0	1	0	0	0	0	0	2	1	0	1	1	0	0	1	0	0	1	2	0	0	3	2	0	2	0	0	0	0	1	1	0	0	1	1	2	0	1	0	0	0	1	0	1
PRUNE2_11113	24	24	34	42	29	19	10	19	43	58	24	38	32	43	19	16	15	23	25	23	9	23	10	6	5	4	42	32	33	26	29	29	22	18	7	17	17	10	15	16	46	29	6	5	20	26	15	12	39
SEL1L_11119	191	152	292	311	299	304	231	253	256	385	220	254	222	206	204	217	185	214	217	225	186	283	279	301	197	188	247	221	239	277	176	189	232	237	179	228	177	199	213	179	280	249	425	373	204	212	176	209	274
ISG20_11135	1	1	53	45	49	65	61	48	3	6	15	18	6	9	20	15	6	10	11	4	390	350	551	618	419	414	0	4	6	16	31	13	185	257	570	614	772	702	746	656	4	6	42	37	66	49	254	298	6
CCL14_11163	1	0	0	0	0	0	0	0	0	0	0	0	0	0	0	0	0	0	0	3	3	0	0	0	1	0	0	0	0	0	0	0	0	0	0	0	0	0	0	0	0	0	0	1	1	0	0	0	0
SYP_11176	2	0	0	1	0	3	4	3	1	0	2	1	0	3	2	2	4	0	3	4	0	2	0	0	0	0	2	0	1	0	2	3	1	0	0	0	0	1	0	0	1	2	0	0	1	2	1	0	0
TMEM185A_11192	138	128	202	195	186	215	127	130	194	227	135	166	151	156	153	157	155	115	154	158	174	171	204	239	163	153	142	142	189	219	129	102	145	142	175	191	166	172	153	142	191	156	114	92	136	129	116	102	256
FZD2_11193	29	28	57	34	39	48	22	42	28	20	26	31	31	17	33	32	40	27	15	20	21	16	28	43	41	39	4	0	37	28	6	6	14	22	20	23	24	18	44	45	24	16	21	25	6	11	12	19	37
FASN_11197	792	865	788	875	841	902	552	530	511	593	545	558	573	465	576	647	697	680	644	654	572	486	691	827	493	453	190	177	821	897	449	444	525	611	409	487	470	492	489	475	558	555	315	336	551	523	307	380	1140
GPX2_11201	0	0	0	0	0	0	0	0	0	2	0	0	1	0	0	0	0	0	0	0	0	0	0	0	0	0	0	0	0	0	0	0	0	0	0	0	0	1	0	1	1	0	0	0	1	0	0	0	0
FMO5_11213	0	0	7	1	1	2	1	1	0	0	4	1	0	0	1	0	3	0	0	1	2	0	0	1	1	0	2	3	0	2	0	0	2	0	0	0	0	1	4	1	0	2	0	0	3	2	0	0	0
JUNB_11226	2	1	3	3	1	0	0	2	6	1	1	0	2	0	1	1	0	1	2	1	3	2	9	7	5	5	0	2	5	1	8	5	4	6	4	7	2	1	11	10	11	8	2	1	5	13	3	9	1
P2RX3_11227	0	0	0	0	2	0	2	0	0	1	1	1	0	2	0	2	0	0	3	1	0	0	0	0	0	0	1	0	1	0	0	0	0	0	0	1	0	0	2	0	0	3	2	1	1	2	0	3	1
SCNN1B_11243	0	0	0	0	2	0	0	0	0	0	0	0	0	0	0	0	0	1	0	0	0	0	0	0	0	0	0	0	0	0	0	0	0	0	0	0	0	0	0	0	0	2	1	0	0	0	0	0	0
TCF19_11253	0	0	0	1	0	0	2	0	1	0	2	0	1	1	1	1	0	0	1	2	0	1	0	0	1	0	0	0	1	1	0	0	0	0	4	0	2	2	1	0	1	0	0	0	2	0	0	3	1
SLC44A4_11273	0	0	0	0	0	0	0	2	0	0	0	0	0	0	0	0	0	1	0	0	0	0	0	0	0	1	0	0	0	0	1	0	0	0	1	0	1	0	0	0	0	0	0	1	0	0	2	0	0
EDNRB_11280	10	5	11	35	4	8	12	13	20	36	21	19	34	18	3	7	20	10	36	20	3	4	2	7	4	4	20	14	30	49	23	28	2	0	4	12	5	2	2	5	18	18	15	3	21	16	4	11	15
PKIB_11293	19	10	9	12	14	19	4	3	13	13	5	5	4	8	5	11	18	9	6	12	11	12	24	22	9	7	12	13	10	14	6	5	4	10	2	10	11	15	11	5	18	8	10	7	14	4	4	6	13
ANKRD26_11298	17	25	47	54	33	26	33	22	36	35	36	24	24	34	23	26	26	29	26	28	29	20	47	31	20	26	35	37	15	27	18	30	24	28	17	14	21	13	13	20	34	22	28	23	12	17	10	14	37
COL16A1_11319	11	15	13	9	10	11	12	7	15	20	11	9	10	10	5	7	13	17	24	15	15	4	20	12	53	44	23	17	56	78	10	8	8	14	6	11	15	13	23	19	13	15	39	38	12	13	2	5	16
RASSF5_11333	0	0	6	3	2	5	2	1	1	2	0	0	1	4	1	4	1	0	4	5	32	19	19	18	30	34	5	5	5	11	13	4	17	14	447	448	247	226	192	167	33	27	13	11	120	87	260	274	2
ASCL1_11345	25	31	66	80	24	25	29	30	34	54	50	58	48	21	21	21	57	54	136	77	54	46	58	43	65	60	125	74	71	121	45	78	42	38	7	17	9	8	8	11	17	31	17	16	29	17	0	11	56
MRPL14_11352	172	141	232	174	247	236	128	148	118	171	148	155	149	178	162	179	142	150	112	161	293	208	286	282	255	236	77	65	257	267	171	138	191	211	228	227	281	224	226	224	168	158	165	180	202	154	162	173	208
CLEC4A_11353	10	15	9	29	25	13	17	13	24	12	16	15	20	9	9	12	16	10	20	17	14	9	8	11	17	15	7	6	20	12	22	12	15	15	10	9	9	3	13	16	5	16	9	26	9	8	7	11	15
CENPH_11358	392	345	445	499	716	730	324	384	320	386	214	281	262	255	309	297	426	328	302	342	571	538	945	986	579	476	393	309	429	407	168	192	306	326	284	281	371	483	344	279	394	360	194	149	225	183	194	204	449
MZB1_11368	0	0	0	0	0	0	0	0	0	0	0	0	1	0	0	0	0	0	0	2	0	0	0	0	0	0	0	0	0	0	0	0	0	0	1	0	0	0	0	0	0	0	0	0	1	0	0	0	0
HERC5_11373	63	42	151	190	153	166	103	79	71	48	121	129	54	54	59	83	76	72	65	89	5578	5048	4839	5274	3099	3159	39	36	139	114	967	758	3243	3227	2948	3259	2277	2491	1954	1721	38	44	255	318	438	425	1653	1810	67
GAD2_11406	0	0	1	1	0	0	0	0	0	0	0	1	0	0	0	0	0	0	0	0	0	0	0	0	0	1	0	0	0	0	0	0	0	2	0	0	0	0	0	0	0	0	0	0	0	0	0	0	0
TRAF3IP2_11425	11	11	26	49	23	37	18	26	15	38	28	31	23	24	25	19	22	15	51	19	41	27	54	54	51	40	16	27	23	33	29	23	35	40	64	70	125	69	91	88	28	32	49	27	31	20	26	23	30
TSPAN1_11441	1	1	0	1	0	0	0	2	4	0	0	0	0	0	0	0	0	1	0	2	0	0	0	0	2	0	0	0	2	2	2	0	0	0	0	0	0	0	0	1	1	1	0	2	1	0	1	2	1
PLEKHA7_11450	626	653	620	707	540	615	443	524	776	822	554	712	400	344	458	471	829	656	629	692	438	498	605	730	483	495	873	694	570	623	654	617	380	404	191	214	229	264	242	228	735	607	314	281	379	342	242	241	806
APOBEC3G_11453	0	0	0	6	7	0	4	1	1	0	0	0	0	2	2	3	0	1	0	0	2	0	2	1	4	2	0	0	0	1	0	1	7	1	5	8	4	5	0	4	0	0	0	1	3	2	1	0	0
SLC2A14_11487	2	1	25	7	10	4	9	16	2	3	5	9	4	6	6	2	7	0	2	7	0	3	7	1	8	8	3	3	2	10	1	6	3	2	0	3	5	0	11	3	4	1	3	10	4	0	2	0	3
LRCH4_11541	5	8	11	14	11	5	8	3	22	9	10	7	14	11	5	4	12	6	13	11	9	11	7	16	8	11	14	9	20	13	7	3	5	15	12	11	13	6	8	15	12	10	7	6	23	6	4	14	14
MAPT_11555	14	13	11	13	7	2	9	10	15	14	11	16	19	14	4	13	20	19	12	17	7	2	4	6	0	0	20	20	5	6	14	5	12	8	4	7	4	2	0	1	17	19	4	2	13	15	7	7	19
ITK_11559	0	0	27	26	25	16	16	18	17	18	8	6	27	26	15	20	1	0	2	1	2	1	0	0	3	0	2	0	2	0	0	0	0	1	20	23	17	11	13	8	19	27	0	0	33	35	26	38	0
GGT5_11580	0	1	1	5	1	2	1	1	0	0	0	2	0	0	0	1	0	1	1	0	2	0	4	2	6	3	0	0	0	1	0	0	1	0	1	3	6	5	14	9	3	1	12	8	0	0	0	0	0
FABP1_11582	0	0	0	0	0	1	0	1	0	0	0	0	1	0	0	0	0	1	0	0	0	0	0	0	2	0	0	0	0	0	1	0	0	0	0	1	1	0	0	0	0	0	0	0	0	0	0	1	0
NTN4_11596	1	1	8	0	9	4	4	1	2	4	6	2	0	7	8	2	4	0	3	4	0	6	2	3	2	1	0	0	4	6	1	2	0	2	0	1	1	0	4	3	0	2	4	2	1	1	1	1	3
S100B_11600	269	258	518	562	346	416	312	343	613	707	376	380	322	366	369	349	279	292	283	366	201	216	113	121	62	61	567	471	133	133	257	304	184	214	199	239	87	91	48	67	483	431	67	59	319	307	158	180	303
ZBTB41_11607	414	387	648	721	559	602	446	437	745	773	555	584	594	476	375	391	474	345	369	387	417	440	463	515	347	361	591	544	423	472	363	389	383	420	393	402	350	363	371	339	665	563	505	497	480	425	344	409	631
LHX2_11628	2	4	5	0	6	1	1	1	0	3	1	3	5	0	2	0	0	2	3	1	11	6	2	3	7	1	2	3	0	3	3	2	0	3	4	6	11	9	10	7	0	3	2	6	2	3	3	0	2
PRKAA1_11642	78	80	112	150	120	99	106	77	94	118	158	112	132	105	62	64	71	114	149	115	101	84	117	98	104	95	145	147	164	215	99	112	89	113	72	100	88	66	122	79	124	108	215	149	91	92	62	86	150
USH1C_11650	1	0	0	2	0	0	0	0	0	1	0	0	0	0	0	0	0	0	0	0	1	0	0	0	0	1	0	1	0	0	0	0	0	0	0	0	2	0	0	0	0	0	0	0	0	0	0	0	0
PUS1_11654	27	34	35	41	29	31	14	21	25	37	42	40	43	35	25	25	37	28	38	28	37	39	38	46	35	25	31	17	67	70	31	25	24	38	29	36	57	41	34	31	39	41	78	73	37	20	26	33	59
GMFG_11656	0	0	0	1	1	0	0	0	0	1	2	0	0	2	0	0	0	0	1	1	0	0	0	0	0	0	0	0	1	0	0	0	0	1	0	0	0	0	0	0	0	3	0	1	1	1	1	0	0
PCDH8_11671	26	57	115	109	38	36	57	67	137	122	68	69	58	58	50	42	86	78	92	71	38	39	77	81	110	85	66	45	344	385	15	9	14	24	14	22	22	34	45	32	69	74	89	128	26	19	8	9	38
SAMHD1_11680	151	114	1862	1837	1608	1640	918	858	411	446	479	531	497	521	800	736	241	228	166	148	2847	2617	3119	3284	1707	1723	200	125	356	308	470	422	1300	1366	3377	3719	3552	3269	2216	1851	414	381	408	404	716	677	1462	1579	188
AHSP_11700	1	0	0	0	0	0	1	1	1	0	0	0	1	0	0	0	0	1	0	2	0	0	0	1	0	0	10	4	2	1	3	0	2	0	1	2	0	0	1	0	0	2	0	0	3	0	1	0	0
KIF9_11747	0	0	0	0	0	0	0	0	0	2	0	1	0	1	0	0	0	0	0	2	2	0	0	0	0	0	1	0	0	0	1	2	0	4	0	0	1	0	0	0	1	0	0	3	0	0	0	1	0
ITGA5_11750	3	1	5	13	4	10	5	5	5	9	4	16	11	5	9	3	7	12	10	11	25	18	20	26	20	21	9	5	16	26	16	12	18	27	9	25	20	11	18	23	18	13	30	19	9	16	16	22	8
ISL1_11752	0	0	0	0	0	1	0	0	0	0	0	0	0	0	0	0	0	0	0	0	0	0	0	0	0	0	0	0	2	1	0	0	0	0	0	0	0	0	0	0	0	0	0	1	1	0	0	0	0
TNFRSF9_11760	3	4	0	2	1	1	0	2	4	4	1	1	2	0	0	2	6	7	4	8	98	109	153	129	128	148	75	65	91	91	73	77	70	99	76	76	91	61	85	61	89	81	140	93	105	78	54	99	2
GUCY1B1_11762	87	73	177	137	121	101	68	89	178	152	79	116	105	108	82	97	146	119	124	127	86	77	83	113	77	59	186	155	95	86	87	82	50	75	34	45	48	46	50	52	169	165	20	19	68	61	31	24	146
UEVLD_11769	95	122	172	188	136	174	122	83	125	189	104	114	88	135	104	128	103	101	36	115	210	202	160	210	121	86	175	96	104	79	153	125	148	145	191	234	134	195	125	108	146	147	54	102	140	122	125	148	125
IFI44_11793	357	304	2728	2597	2453	2396	1822	1722	1100	1307	1323	1431	1265	1339	1776	1649	744	700	533	647	7936	7280	7279	7928	5367	5687	400	300	787	724	2061	1849	4858	5125	6433	6928	6109	6200	5867	5777	770	642	1482	1542	2263	1990	3919	4035	489
KCNA1_11815	6	5	17	12	17	7	11	5	8	7	7	14	6	3	14	10	8	6	5	13	50	55	44	43	23	18	19	30	4	5	28	28	33	34	139	171	130	129	116	117	8	13	1	1	23	29	88	77	9
SULT1C2_11834	0	0	0	0	0	0	0	1	0	1	0	0	0	0	0	0	0	0	1	0	1	0	1	0	0	0	0	0	0	0	0	0	0	0	0	0	0	0	0	0	0	0	0	0	0	1	1	0	0
CNN3_11840	17483	17338	32953	36957	31435	33438	20291	19979	28146	29596	20447	19120	25081	23128	24316	24143	16935	16333	16442	17447	16956	15948	16021	17756	11944	10905	29016	23111	16044	16471	16832	17434	13708	15415	24299	26484	17902	18408	14394	13157	29930	32890	12852	10398	28350	26038	19808	22163	21680
CD69_11844	0	0	0	1	2	4	0	1	0	1	0	0	0	0	0	2	0	0	1	0	10	24	7	7	5	4	94	95	0	0	21	39	12	10	48	55	23	18	11	13	80	88	0	0	56	52	35	76	0
CDA_11848	1	0	0	0	0	0	0	0	0	0	0	0	0	0	1	0	1	0	0	0	0	1	1	0	0	3	0	0	0	0	0	0	0	4	0	0	1	1	2	2	0	0	0	0	0	0	0	0	0
CHMP4C_11853	0	0	1	0	0	2	1	1	0	0	0	0	0	0	1	0	0	0	0	3	1	0	0	1	1	1	5	2	0	0	0	0	2	0	0	1	2	1	0	1	1	0	0	0	0	0	0	0	1
NR4A3_11854	14	13	23	27	30	19	12	8	39	53	28	28	26	20	26	18	17	18	16	25	8	10	4	5	1	2	64	59	7	7	32	29	14	10	2	17	3	7	2	1	64	51	2	8	62	27	15	15	16
BIRC3_11879	14	14	2	6	6	15	3	4	9	6	9	4	3	3	2	8	17	9	18	15	891	930	738	844	589	566	368	318	174	208	423	460	703	873	943	1097	895	995	723	675	272	254	171	133	298	286	680	730	26
CYP11A1_11890	0	2	1	0	0	0	0	3	0	0	0	0	0	0	0	0	0	0	0	0	0	0	0	1	0	0	0	4	0	0	0	0	0	0	0	0	0	0	1	0	3	0	0	0	0	0	0	0	0
CYP24A1_11891	0	1	4	0	0	1	0	0	1	0	0	1	0	0	1	1	2	0	0	0	0	0	0	0	0	0	1	0	0	1	0	4	0	1	3	0	0	0	3	0	0	0	0	0	1	1	3	0	0
CYP26A1_11892	2	3	1	2	0	2	0	3	0	0	1	0	1	0	1	0	0	2	2	0	1	2	2	0	2	3	1	0	3	5	6	1	0	1	1	0	4	5	1	1	2	1	3	6	0	0	0	0	1
RSL24D1_11903	584	599	651	645	631	683	345	355	662	747	429	540	497	488	445	412	582	503	492	534	570	527	573	610	370	362	785	644	632	652	494	514	457	506	387	446	367	377	279	278	754	682	954	913	543	480	318	387	737
TCEAL9_11904	621	499	884	974	891	859	510	534	710	891	782	776	674	650	642	615	610	580	749	772	727	824	691	778	505	504	979	816	790	893	543	579	601	736	473	622	440	496	522	489	789	705	660	615	684	620	455	509	859
HAUS1_11922	159	109	182	162	172	167	82	84	114	114	110	139	82	106	138	104	107	113	96	124	203	171	196	205	125	120	116	54	224	170	74	78	97	120	47	96	97	75	117	115	111	91	59	92	82	74	66	60	202
CST1_11926	0	0	0	0	0	0	4	0	0	0	0	0	0	0	0	0	0	0	0	0	0	0	0	0	0	0	0	0	0	0	0	1	0	0	1	0	0	0	0	0	1	0	0	0	0	0	0	0	0
SERPINE2_11933	1	0	2	10	15	5	9	7	5	11	4	10	9	7	5	2	3	1	5	7	9	11	11	8	13	9	26	17	10	4	5	6	8	2	7	10	8	14	11	23	8	12	54	50	11	11	6	5	1
LILRA6_11957	0	0	0	2	2	0	2	1	0	0	2	3	0	0	2	0	1	0	0	0	0	0	3	0	0	0	0	1	0	0	2	1	0	0	2	1	2	3	0	0	0	2	3	0	0	0	0	0	1
H2BC6_11972	7	11	17	16	34	23	19	7	11	7	15	22	11	11	10	8	8	12	15	8	16	14	24	30	26	34	11	8	39	47	7	14	6	9	5	4	8	6	22	13	7	6	21	25	13	8	12	3	20
TOMM20_11983	28	38	35	38	41	58	29	28	46	45	48	43	44	38	32	30	31	44	73	56	42	49	45	53	34	33	66	30	47	63	40	48	47	63	41	29	46	28	22	26	44	34	59	54	48	34	23	31	50
GATA6_11986	5	12	1	6	9	6	3	1	9	14	5	7	3	7	11	2	5	7	4	3	40	31	11	23	7	24	62	63	8	30	32	26	21	18	37	69	15	22	4	7	23	28	10	5	23	11	17	22	12
ANLN_12002	468	354	440	471	773	725	299	317	248	275	345	321	265	260	284	301	395	418	375	417	672	684	1104	1111	771	692	513	474	537	649	286	300	449	536	293	366	496	429	461	406	427	344	245	258	285	275	241	281	688
ASNS_12040	382	416	579	831	634	590	383	387	448	498	452	422	518	335	318	398	409	404	644	416	401	385	428	436	349	334	494	447	435	696	294	362	365	374	280	381	388	318	301	309	447	435	5539	3517	340	384	332	349	544
HOXD8_12050	5	2	4	1	6	2	4	1	1	3	2	6	4	1	1	3	2	1	3	0	1	3	3	0	0	0	4	2	3	3	0	0	2	1	0	1	2	1	1	1	3	8	3	4	1	3	2	1	5
NR1I2_12051	1	0	4	2	2	1	0	0	4	0	1	5	1	0	3	3	0	0	0	2	2	2	1	0	2	0	2	0	0	0	1	0	2	0	0	0	2	0	1	2	0	1	0	0	1	4	1	0	0
MXRA5_12061	351	345	1198	1266	582	642	540	562	855	972	324	397	707	586	599	634	576	416	481	591	195	236	148	139	136	151	600	536	304	338	416	392	188	236	311	352	224	264	260	245	883	788	88	90	453	489	260	318	377
CYP2C9_12062	0	0	3	0	0	3	0	1	2	2	1	4	0	0	2	3	0	1	1	2	3	1	3	3	4	3	0	4	0	5	1	4	2	0	1	1	0	2	1	2	2	0	4	3	4	1	0	2	1
L1CAM_12063	8	3	5	3	2	4	3	1	3	0	7	6	2	1	2	2	7	3	5	1	14	8	30	10	14	22	1	4	30	47	4	6	15	23	11	11	22	12	17	19	2	1	12	19	8	15	12	12	2
ZNF185_12083	3	3	9	7	8	9	0	6	8	6	6	5	6	4	5	4	10	7	7	5	5	1	3	0	1	3	1	2	9	10	3	6	2	12	3	2	5	1	0	1	8	8	9	8	3	2	6	5	13
MS4A7_12103	0	0	2	0	0	0	0	0	0	0	0	0	0	0	0	0	0	0	0	0	0	0	0	2	1	0	0	2	0	0	0	0	1	0	0	0	0	0	0	0	0	0	0	0	0	0	0	0	0
NRXN1_12116	11	9	10	13	13	12	5	8	14	18	8	28	18	13	3	2	17	5	8	13	1	3	3	0	0	0	12	9	3	5	5	8	4	3	0	0	2	0	0	0	7	13	3	0	4	4	0	1	20
TM4SF1_12122	0	1	1	0	0	0	0	0	1	0	0	0	2	0	0	0	0	2	0	0	0	2	0	7	4	4	1	1	4	4	0	5	2	3	2	2	5	8	0	1	0	0	1	2	4	0	2	0	1
GINS1_12127	18	12	16	16	25	18	9	6	6	7	17	15	7	12	8	27	18	13	13	23	46	46	34	46	29	19	19	10	20	21	7	5	29	17	15	13	23	14	19	23	23	16	4	6	9	8	13	15	23
SPOPL_12140	140	96	155	144	161	161	108	115	127	184	166	140	165	116	81	62	112	123	176	136	127	113	156	145	145	142	183	134	252	308	120	125	108	116	73	73	95	83	110	105	142	124	232	155	116	119	65	66	210
TYR_12159	0	0	0	0	0	0	0	0	0	0	0	0	0	0	0	0	0	0	0	0	0	0	0	1	0	0	0	0	0	0	0	0	0	0	0	0	0	0	0	0	0	1	0	0	0	0	0	0	0
RGL4_12168	0	0	0	0	0	0	0	0	0	0	0	2	0	0	0	0	0	0	0	0	0	0	0	0	0	0	0	0	0	0	1	0	0	0	0	0	0	0	0	0	0	0	0	0	0	0	0	0	0
HSD11B2_12187	0	0	0	1	0	0	0	0	0	0	0	0	0	0	0	0	0	0	0	0	0	0	0	0	0	0	0	0	0	0	0	0	0	0	0	0	0	0	0	0	0	0	0	0	0	0	3	0	0
ATP1A1_12191	792	636	1290	1007	1166	1114	821	709	914	1002	928	1027	735	864	881	762	822	912	684	973	783	732	743	857	748	680	1114	617	1290	899	701	670	768	892	533	562	472	478	627	635	1097	896	860	1115	849	678	562	617	1101
ALAS2_12215	0	0	0	0	0	0	0	0	0	0	0	0	0	0	0	0	0	0	0	0	0	0	0	0	0	0	0	0	0	0	0	0	0	0	1	0	0	0	0	0	0	0	0	0	0	0	0	0	0
CIT_12219	94	83	79	75	117	92	50	70	56	76	57	57	40	46	62	54	92	89	89	63	91	86	148	169	132	116	52	51	86	113	39	41	44	55	28	31	56	61	68	71	42	52	51	47	41	27	23	23	131
PPARGC1A_12225	165	165	160	180	199	198	91	79	148	173	142	146	134	148	157	151	165	152	171	154	34	30	25	20	21	37	96	76	49	56	11	48	34	39	11	9	13	12	24	16	118	92	242	253	35	21	27	31	238
ESR1_12234	0	1	2	1	4	0	0	0	1	3	2	2	0	3	0	0	0	0	3	1	0	0	1	0	2	1	0	1	0	1	0	1	0	1	1	0	1	0	0	0	0	1	0	0	1	2	1	0	0
GEN1_12237	134	148	143	218	169	191	114	122	198	167	91	127	135	104	127	110	153	121	123	124	251	266	232	309	190	191	85	94	171	161	88	83	139	178	153	151	170	193	166	154	161	128	89	97	132	125	137	112	213
PCOLCE_12241	0	0	0	2	0	0	1	2	0	0	0	0	1	0	0	0	0	0	0	0	0	0	0	0	2	0	0	0	2	0	0	0	0	0	0	0	1	0	0	0	0	0	0	0	0	0	0	0	0
KLRC2_12242	1	1	2	2	1	0	2	0	1	3	1	1	2	1	0	4	0	0	1	0	3	1	3	0	3	1	1	3	1	0	3	1	1	2	1	2	3	2	2	1	0	1	0	0	0	0	2	3	0
SCOC_12252	1559	1533	2279	2424	1760	1983	1277	1287	2304	2499	1290	1519	1604	1318	1466	1427	1580	1312	1361	1543	1327	1522	1362	1466	843	910	2058	1825	1152	1124	1268	1276	1032	1152	987	1140	920	1160	749	783	2081	1961	1095	1068	1293	1261	862	984	2047
CD2_12308	0	0	0	0	0	0	0	0	0	0	0	0	0	0	0	0	0	0	0	0	0	0	0	0	0	0	0	0	0	2	0	0	0	0	0	0	0	0	0	0	0	0	0	0	0	0	0	0	0
CD9_12310	88	95	64	63	90	86	57	46	71	97	81	98	52	61	47	53	76	85	49	81	79	64	105	134	100	72	90	56	77	62	60	94	93	90	84	69	92	71	111	106	77	86	37	65	79	84	57	55	115
ACTA1_12333	0	3	0	0	3	1	0	1	0	0	4	0	1	0	0	1	0	0	1	1	4	0	0	1	1	0	2	1	5	1	0	1	0	0	0	0	4	2	0	0	0	1	1	1	0	3	0	2	0
ADAM8_12335	5	3	2	2	8	15	2	9	4	10	5	3	6	2	4	7	6	4	4	4	4	7	11	3	2	1	0	1	8	2	2	3	2	4	3	4	5	4	4	3	8	1	7	4	4	3	1	0	6
TPPP3_12338	242	244	292	315	266	304	354	377	482	506	701	727	354	335	228	219	275	301	377	354	102	76	38	66	53	60	301	325	168	222	268	249	101	175	75	39	15	9	10	16	446	406	67	32	294	308	102	86	355
LYAR_12352	149	160	158	189	151	191	87	91	160	147	94	113	136	102	123	126	133	113	136	121	163	175	215	210	135	125	177	196	193	175	152	145	157	170	136	187	150	203	139	97	184	166	264	232	143	144	116	130	196
CXCL12_12361	4	5	15	11	9	14	5	8	3	12	15	24	9	4	3	1	6	10	6	11	1	3	2	5	6	15	4	11	26	24	5	2	2	0	0	3	1	0	2	2	7	7	4	4	1	1	0	0	9
MRPL37_12369	226	166	277	223	273	269	138	144	204	208	189	210	169	195	211	148	212	221	206	251	227	159	205	225	203	182	285	163	255	250	179	150	182	200	161	186	205	137	172	163	237	198	159	209	196	152	157	161	259
A2M_12371	710	587	2409	2372	2038	1797	1443	1350	1798	2088	1569	1619	1819	1781	1510	1562	664	771	1251	1250	814	738	409	461	316	350	1614	1303	450	452	1124	1061	764	918	1547	1920	857	671	766	710	2015	1834	410	384	2350	2158	1587	1711	775
RGPD1_12424	2	1	67	62	87	84	51	63	4	0	29	6	9	4	27	24	1	1	6	4	6	9	14	6	9	8	1	4	11	3	1	0	1	1	8	5	12	7	19	16	4	5	5	2	1	4	3	1	2
TUBA1A_12436	84	61	239	221	156	130	168	183	160	188	223	231	156	121	114	96	164	116	176	139	32	30	42	48	57	46	56	55	122	172	35	27	36	26	20	17	15	20	34	24	88	63	75	46	31	33	9	12	124
CDCA7_12449	2	5	3	2	4	3	2	1	4	3	0	1	1	2	2	2	0	2	4	6	4	9	2	8	6	4	4	0	9	10	2	1	7	3	2	3	7	3	1	2	3	1	6	3	4	0	3	6	6
SLC18A2_12450	3	1	2	0	0	0	0	0	0	2	0	2	0	0	5	1	2	0	3	1	0	1	1	1	2	0	3	1	1	0	7	5	3	3	19	24	3	6	0	1	16	11	0	0	23	16	25	24	0
REL_12463	37	31	44	48	48	35	32	34	52	53	34	36	35	30	23	23	63	38	51	46	88	84	67	86	79	54	261	250	78	71	99	112	69	73	52	64	42	46	56	57	256	179	31	44	142	101	39	60	50
MAP1B_12472	1585	1584	1924	2202	1787	1693	1202	1291	1714	1967	1599	1631	1688	1444	1382	1427	1665	1477	1863	1573	966	880	1026	1108	734	755	1966	1713	1650	1927	1378	1334	989	1210	748	809	845	836	820	724	1722	1630	2127	1783	1419	1334	849	1008	2262
AMER1_12473	43	32	36	45	45	38	29	34	46	46	27	29	48	41	33	35	28	26	16	15	59	80	52	95	40	33	24	43	41	29	65	44	60	47	88	96	80	82	66	46	54	33	31	28	53	45	59	57	42
SCN3A_12485	3	4	1	2	5	4	2	2	3	17	4	9	9	6	1	4	2	1	8	6	0	2	0	3	3	2	7	4	2	4	0	3	5	3	0	0	0	1	1	0	6	7	1	1	3	0	2	1	1
RTN4IP1_12502	141	130	190	181	231	189	110	132	156	166	120	115	124	100	127	158	158	129	135	146	142	138	179	156	121	119	125	118	145	142	65	66	90	118	103	134	159	124	101	112	125	110	102	131	81	71	73	74	171
ARRDC4_12510	1018	999	1908	2164	1372	1345	967	942	2997	3057	1616	1711	1812	1418	1042	974	1162	978	1261	1071	1054	978	1090	1194	863	765	2622	2305	530	664	1193	1374	646	665	485	520	307	268	273	272	2054	2005	779	663	1247	1244	461	481	1237
E2F7_12550	47	34	27	36	40	46	17	10	16	28	8	20	12	10	27	17	30	26	27	32	66	67	83	80	57	48	69	46	68	92	20	32	67	37	63	89	50	46	47	44	35	33	80	58	30	31	35	38	38
H3C2_12576	884	810	717	789	1024	1053	409	371	480	476	614	585	545	505	550	465	736	795	783	854	664	532	1444	1541	926	868	563	448	1465	1515	354	417	458	566	188	218	586	467	676	684	600	549	419	458	531	472	304	271	1237
VEGFA_12596	17	16	6	9	10	11	7	10	8	7	11	20	15	12	16	16	16	19	19	17	16	7	19	7	16	22	17	11	20	23	6	9	17	19	17	7	24	16	16	23	12	12	105	111	7	16	11	1	18
COL11A1_12599	154	127	216	197	165	165	101	91	169	181	143	178	183	193	181	126	157	201	225	185	179	130	184	189	119	123	241	209	118	103	154	124	169	166	126	209	134	114	122	105	227	167	87	77	179	154	116	159	204
APTX_12622	216	161	272	267	241	259	181	127	187	229	205	193	191	178	172	199	193	180	226	225	150	180	247	234	134	146	193	157	252	240	143	144	136	180	104	135	128	121	132	132	247	153	213	194	135	120	113	115	235
KITLG_12641	211	167	376	389	311	402	253	237	374	407	368	374	244	217	223	200	297	321	316	392	295	296	393	424	345	294	634	403	616	629	228	208	194	201	107	152	122	105	163	175	415	344	848	949	212	186	78	66	306
MCM2_12650	1	1	7	5	17	6	0	10	4	1	6	6	4	8	12	6	3	5	7	12	17	17	21	12	9	12	1	3	10	8	2	4	8	4	4	11	7	4	10	5	6	1	4	3	6	9	2	5	5
FOXJ1_12696	60	69	143	104	98	117	84	110	57	66	44	73	54	49	97	93	76	66	82	76	13	6	23	36	20	15	3	0	17	21	11	4	11	8	12	2	18	10	10	10	33	15	7	2	11	10	3	2	74
C1QB_12721	1	1	1	2	0	0	0	0	2	0	0	0	0	1	0	0	0	1	0	0	0	1	1	0	0	0	0	2	1	0	0	2	0	1	2	2	4	0	0	0	2	1	1	2	1	1	1	2	0
CYP11B1_12735	0	0	0	0	0	0	0	0	0	0	0	0	0	0	0	0	0	0	0	0	0	0	1	0	0	0	0	0	1	0	0	1	2	0	0	1	0	1	0	0	0	0	0	2	0	0	1	1	0
TTC17_12763	4	4	8	9	5	9	5	9	11	3	10	10	10	5	5	7	9	6	5	13	9	8	13	11	11	3	8	4	5	19	6	8	9	10	5	4	5	2	6	6	7	7	13	15	10	8	6	5	10
PSMB6_12772	851	783	1152	1276	1277	1187	777	688	847	970	959	1100	771	730	714	736	817	767	955	916	826	759	979	1034	740	729	834	672	1056	1227	788	725	769	836	740	823	743	700	718	687	919	915	1054	1003	870	728	609	674	1111
CCR1_12794	0	0	0	0	0	0	0	1	0	0	0	0	0	0	0	0	0	0	0	0	0	0	0	0	0	0	0	0	1	0	0	0	0	2	0	0	0	0	0	0	0	1	0	0	1	0	0	0	0
CNN1_12800	241	245	148	159	160	169	65	57	121	135	131	106	107	94	128	119	177	196	176	207	130	155	95	73	50	36	211	133	189	188	149	135	171	191	63	63	35	31	20	21	194	198	124	136	106	110	96	112	366
HHIP_12808	1	1	2	8	4	6	1	4	2	1	0	0	3	4	3	3	2	3	3	6	1	4	4	1	1	1	1	1	2	9	1	2	0	1	1	1	2	0	1	0	3	1	14	13	1	4	0	2	4
ADM_12873	21	18	22	27	26	23	20	16	17	26	29	24	17	11	17	25	11	12	19	20	49	43	59	86	50	59	20	13	72	52	18	13	18	30	29	32	72	48	89	64	27	25	63	81	15	8	11	18	30
PHLDA1_12880	1220	1146	2585	3095	2144	2246	1484	1527	2508	2928	1197	1486	1399	1279	1794	1674	1364	1171	1335	1536	1825	2056	1625	1684	1002	946	1095	1004	1600	1713	987	909	1496	1734	2034	2391	1749	2030	1293	1249	2212	2000	1813	1809	1567	1663	1546	1696	1642
SMC2_12897	51	56	69	66	89	91	47	64	54	45	51	48	57	46	46	33	46	53	95	62	89	102	120	95	71	86	58	48	95	139	55	36	49	61	18	42	58	41	44	50	56	46	36	34	36	32	26	27	96
NANOG_12901	2	0	5	6	7	3	6	7	4	4	3	7	2	1	4	1	2	2	2	0	2	3	1	1	1	2	1	7	1	10	0	0	2	1	2	3	1	4	6	0	3	1	6	3	0	0	2	0	1
TPR_12910	1548	1555	2415	2525	2200	2419	1455	1550	2010	2116	1391	1455	1428	1299	1555	1495	1794	1440	1507	1651	2213	2571	2400	2666	1737	1620	2144	1945	1938	2087	1277	1337	1567	1857	1699	1967	1655	1879	1665	1420	2048	1855	1970	1654	1390	1261	1209	1344	2434
MTERF3_12919	216	154	214	268	218	252	149	160	203	210	209	175	197	152	194	169	181	177	169	198	241	288	340	304	213	190	208	212	204	275	180	163	227	256	161	171	191	194	198	167	166	172	199	214	114	139	116	143	252
GPR183_12920	8	0	2	0	3	0	0	0	9	7	0	0	0	0	0	0	3	1	3	4	1	4	0	0	2	0	14	10	1	0	5	2	3	1	0	1	1	0	1	0	5	7	1	0	4	0	0	0	4
SCGB1D2_12936	0	0	0	0	1	0	0	0	0	0	0	0	0	0	0	0	1	0	1	0	0	0	0	2	0	0	2	1	0	0	0	0	0	0	0	0	0	0	0	0	0	0	0	0	1	0	0	0	0
C1RL_12969	0	0	0	0	0	0	0	0	0	0	0	0	0	0	0	0	0	0	0	0	0	0	0	0	1	0	0	0	0	0	0	0	0	0	0	0	0	0	0	0	0	0	0	0	0	0	0	0	0
NCF2_12973	5	2	2	1	0	1	0	1	1	1	0	3	0	0	0	1	4	1	0	4	6	3	4	7	0	0	0	2	0	3	1	2	0	4	1	3	0	0	0	1	1	0	1	0	1	0	1	0	0
PIP_12975	0	0	0	1	0	0	0	1	2	0	0	0	2	1	0	0	0	1	0	0	0	0	0	0	0	1	0	0	1	2	0	1	0	0	0	0	1	0	0	0	0	0	0	0	0	0	0	0	0
SLPI_13018	0	1	0	0	0	1	2	0	0	0	0	2	0	0	0	0	0	0	0	0	0	0	1	3	0	0	0	0	0	0	0	0	0	0	1	0	0	0	0	1	0	0	0	2	0	0	1	0	0
TRIP13_13050	44	35	39	36	64	56	26	26	19	19	25	34	37	29	27	22	40	44	40	36	88	69	66	95	65	57	24	14	74	52	19	28	46	72	23	39	44	49	39	31	43	30	20	29	28	27	21	35	79
DHX15_13052	777	679	929	1039	1152	978	616	565	838	906	784	781	834	717	702	663	673	677	837	865	1398	1279	1173	1216	730	800	1130	948	1117	1271	920	883	1255	1408	1289	1522	1276	987	820	760	1025	922	882	827	1149	953	1029	1132	1072
FAM72B_13072	2	5	4	12	16	10	2	5	0	4	7	3	0	5	3	5	6	7	0	2	9	13	11	8	8	5	3	4	14	7	4	3	9	5	1	10	6	1	3	2	5	3	8	11	1	7	1	2	2
DDR2_13092	8	0	11	17	15	8	10	11	9	1	3	7	7	3	11	5	6	6	13	3	2	7	6	12	2	9	1	5	7	6	4	3	1	1	5	6	4	2	2	4	5	3	33	18	10	1	5	5	9
UQCRC1_13094	758	684	839	829	856	875	500	509	711	858	589	617	580	595	690	584	788	703	577	778	577	585	654	742	515	559	640	411	838	839	589	549	593	702	450	513	448	478	481	444	778	617	499	525	600	544	436	531	1028
SEMA5A_13118	143	164	173	208	157	139	199	138	332	406	280	299	225	231	165	118	187	146	191	207	174	146	133	159	146	125	248	199	248	211	216	203	173	168	157	159	89	88	103	85	272	239	80	111	251	221	113	133	201
PDHB_13121	1138	1040	1249	1411	1257	1241	789	818	1276	1358	983	1000	1113	945	942	953	1235	1023	1106	1069	779	773	1000	1050	768	768	1218	999	1100	1253	756	732	680	761	613	685	619	714	630	639	1045	938	875	713	786	757	481	613	1587
ELANE_13129	0	0	0	0	0	0	0	0	0	0	0	0	0	0	0	0	0	0	0	0	0	0	0	0	0	0	0	0	0	0	0	0	0	0	0	0	0	1	0	0	0	0	0	0	0	0	0	0	0
MTNR1A_13132	1	1	1	1	0	0	1	1	2	0	1	1	0	1	1	1	0	0	0	0	2	3	2	0	2	0	6	2	1	0	0	1	2	4	1	1	0	2	1	0	3	1	2	0	1	0	1	0	2
ENO2_13140	164	159	145	184	177	178	125	145	152	171	166	171	132	125	124	117	181	116	143	144	106	156	161	228	150	151	184	149	172	204	81	70	92	79	97	142	209	195	201	219	170	142	126	123	66	78	29	59	221
CACNA2D4_13177	0	0	0	0	0	1	0	0	2	0	0	0	0	0	0	0	0	1	1	0	1	0	0	0	1	0	0	0	0	0	0	0	0	0	1	0	4	0	0	0	0	0	0	0	0	0	0	0	0
SULT1B1_13188	0	2	0	0	0	0	1	0	2	2	0	0	1	0	4	0	0	0	0	1	0	0	1	2	0	0	0	0	0	1	0	1	0	0	0	0	0	1	1	1	0	0	1	0	0	0	0	0	0
BTG2_13191	41	55	65	85	55	55	60	57	57	48	81	68	80	50	25	30	65	54	68	75	19	17	30	28	37	27	29	26	117	146	34	17	14	17	14	21	18	21	24	29	62	79	75	53	43	39	11	8	66
FPR1_13192	0	0	3	0	0	0	0	0	0	0	0	0	2	0	0	0	1	1	0	0	0	0	0	0	0	0	0	0	0	0	0	1	0	0	2	0	0	0	0	0	0	1	1	0	1	1	0	0	0
FGF7_13194	1	1	5	7	4	3	5	3	5	2	2	2	1	5	5	2	1	2	0	3	1	3	1	1	2	0	0	0	0	0	5	3	2	2	3	6	3	6	2	8	0	0	2	0	4	1	6	1	2
ATP5PF_13202	1	4	2	6	3	3	0	3	2	3	1	3	0	1	1	2	0	5	2	2	2	3	1	5	2	3	1	2	5	3	1	2	4	0	3	4	0	0	1	1	4	1	0	0	1	0	3	7	4
GNAI3_13219	23	21	48	60	44	41	44	24	57	71	27	50	50	47	32	31	35	26	41	40	33	21	27	40	14	22	83	64	35	48	37	41	30	32	17	37	31	25	16	8	76	44	24	16	54	59	26	39	41
AKR1B1_13228	3	4	8	6	11	6	6	3	2	2	2	6	4	2	3	2	3	6	5	6	2	10	6	9	1	5	2	2	4	9	1	4	2	9	8	8	19	5	16	22	2	4	10	13	11	5	7	2	8
GCNT3_13241	0	0	0	0	0	0	1	1	0	0	0	0	0	0	0	0	1	0	0	0	0	0	1	1	0	1	0	0	0	0	0	0	0	0	0	2	0	0	1	1	0	0	3	1	0	0	0	0	1
HOXD4_13252	2	5	5	3	2	1	4	6	5	9	2	4	3	1	3	3	4	3	2	4	3	4	0	4	4	0	2	6	2	0	3	3	6	2	0	4	5	2	1	3	2	0	4	2	1	0	4	1	5
CDK13_13258	10	7	17	16	15	13	15	8	7	18	16	15	31	14	11	8	8	10	14	16	13	8	8	7	14	14	19	18	18	25	14	20	13	9	9	7	14	11	12	9	26	12	41	32	16	13	13	13	10
STC2_13264	0	2	1	3	2	2	2	0	1	0	3	1	0	0	2	3	0	2	1	1	0	1	2	6	2	0	0	1	1	1	0	0	0	0	0	4	3	2	9	7	0	5	20	15	3	0	0	0	2
DAAM1_13274	866	850	1283	1400	1139	1308	927	743	1339	1412	901	1019	949	861	710	766	830	688	549	636	374	420	439	561	386	384	1259	1099	676	562	542	534	309	323	251	251	235	282	283	256	894	894	643	580	438	375	216	259	1156
PLA2G2A_13291	2	1	41	46	43	27	58	60	14	32	63	42	16	13	11	19	8	8	10	3	5	4	1	1	3	2	13	14	3	0	5	13	9	8	0	12	1	1	0	0	11	9	8	6	11	8	0	4	4
COL6A3_13292	11	15	11	19	7	14	7	3	7	10	6	8	10	6	9	11	13	14	13	10	31	33	52	64	51	33	6	17	157	198	7	6	9	21	15	8	27	28	30	27	5	5	47	57	5	4	5	6	16
RRM2B_13340	358	267	589	500	549	532	336	318	398	502	441	444	325	359	331	362	351	381	375	385	434	487	621	668	506	464	522	386	588	542	338	333	393	454	301	433	448	426	426	421	411	375	648	646	342	364	316	406	533
G0S2_13343	1	4	1	2	2	3	4	1	0	5	0	6	3	2	0	0	1	6	3	5	0	0	0	0	0	0	0	1	2	1	0	1	0	0	0	0	1	0	0	0	1	0	1	1	4	0	0	2	5
KCNJ15_13362	0	1	2	0	1	0	0	1	0	0	3	2	0	0	0	0	0	1	0	0	7	5	4	7	2	1	0	0	0	0	0	0	2	1	33	40	23	17	10	8	0	3	0	2	4	1	12	12	0
MAOB_13383	74	89	154	182	53	81	66	70	263	294	146	139	202	145	96	119	105	95	163	143	39	50	25	23	23	12	236	216	54	41	129	126	76	65	58	47	9	12	8	10	187	185	16	18	124	138	48	58	89
SRSF2_13425	487	384	686	621	593	605	370	331	421	521	580	583	545	495	537	476	409	441	705	569	817	725	647	665	558	483	726	504	755	933	557	573	792	888	486	544	517	370	512	442	609	513	482	440	678	572	523	595	634
SFRP2_13438	5	7	7	7	7	1	1	4	17	22	20	9	16	10	7	1	4	6	6	10	7	3	6	3	6	4	9	10	8	8	5	6	5	7	3	1	1	3	2	1	9	10	2	3	4	9	2	2	4
ENG_13441	2	1	3	3	10	5	2	5	7	4	2	0	2	5	2	0	4	1	3	1	4	5	3	9	4	4	4	3	1	6	2	0	0	2	3	0	1	2	9	6	3	6	1	3	4	4	1	4	6
CACNA1A_13444	4	7	14	11	5	7	4	8	9	10	18	9	2	4	4	3	11	9	25	11	5	4	5	5	2	10	6	0	10	13	6	8	4	5	3	4	10	5	6	6	15	9	10	0	12	2	2	4	13
XRCC1_13455	0	0	0	1	2	6	0	0	1	3	3	0	4	5	0	1	0	0	3	0	0	0	1	1	1	0	2	0	1	0	0	1	0	0	1	1	0	3	1	0	4	1	1	3	0	0	1	0	0
MND1_13458	70	46	81	95	89	101	32	37	73	43	44	59	60	52	39	40	63	44	79	66	123	122	119	151	100	78	50	55	103	125	22	33	70	81	72	83	86	64	63	73	58	53	50	36	57	62	60	65	91
NCF4_13488	0	1	0	0	0	0	0	1	0	0	0	0	0	0	0	0	1	0	0	0	0	0	0	0	0	0	0	0	0	0	0	1	0	0	0	0	0	0	0	0	0	1	0	0	0	0	0	0	0
MT1B_13496	0	0	0	1	0	0	2	0	1	0	0	0	0	0	0	0	0	0	1	0	0	0	0	0	0	0	0	3	0	0	0	0	0	0	0	1	0	0	1	0	0	0	0	0	0	0	0	0	2
SASH3_13505	0	0	0	0	0	1	2	0	1	0	1	0	0	0	0	0	0	0	1	0	1	0	0	0	0	0	0	1	0	0	0	0	0	1	0	3	1	1	1	0	0	0	0	0	0	0	1	1	0
HSPA2_13514	5	2	14	8	6	9	2	1	8	4	0	3	4	1	3	3	6	2	3	5	1	1	1	9	10	2	1	3	2	7	2	9	4	2	4	0	5	3	3	3	1	6	1	3	6	1	2	0	2
CTTNBP2_13527	0	0	5	8	3	7	2	3	11	7	5	6	0	4	6	1	8	5	5	1	5	3	4	2	1	4	5	0	2	8	2	2	0	0	1	3	2	1	5	2	3	2	3	1	0	2	0	0	6
MOB1A_13529	198	136	242	172	294	288	177	121	171	223	235	231	171	212	162	151	145	171	181	193	293	255	340	385	260	231	281	137	287	245	200	185	337	346	248	343	271	232	258	200	243	175	171	231	283	263	254	281	221
MAGEA6_13535	0	1	0	0	1	0	0	1	0	4	0	1	0	1	0	0	0	1	0	0	1	0	0	2	1	2	1	4	0	1	0	0	0	2	1	0	0	1	2	0	0	1	0	2	0	0	2	3	1
MAGEA3_13536	0	0	0	1	0	0	0	0	0	0	0	0	0	0	0	2	1	0	0	0	1	0	0	0	0	0	1	3	0	1	0	0	1	0	0	2	0	0	0	1	0	0	0	3	0	0	0	1	0
HOXC11_13542	0	0	0	0	0	1	0	0	1	0	0	0	0	0	0	0	0	0	0	1	0	0	0	0	0	0	0	0	0	0	0	0	0	0	0	1	0	0	0	1	0	0	1	0	0	0	0	0	0
BPIFA2_13545	0	0	0	1	0	0	0	0	0	0	0	0	0	0	0	0	0	0	0	0	1	2	0	0	0	0	0	0	0	0	0	0	0	0	0	0	0	0	0	0	0	0	0	1	0	0	0	0	0
ESRP1_13554	0	0	0	0	0	2	1	0	0	3	1	0	0	0	1	2	0	1	0	0	1	0	0	1	1	0	1	0	2	1	0	0	1	2	0	2	0	1	1	0	3	0	16	14	2	0	1	2	0
HAND2_13573	0	0	0	0	0	0	0	0	0	1	1	0	0	1	0	0	0	0	0	0	0	0	0	0	0	1	0	0	0	0	0	0	0	0	1	0	1	0	0	0	0	0	2	1	0	1	0	1	0
TUBB2B_13577	5389	4964	5705	5872	5840	5766	3626	3457	4751	5356	6560	6655	5155	4672	3952	3921	4703	4977	7182	6071	4564	3807	3693	3844	2636	2455	5887	4605	5107	6052	4734	5256	4830	5422	1909	2148	2169	1824	1846	1686	5308	5256	2517	2339	5216	4702	2580	2850	6960
MYB_13607	5	7	3	6	9	11	3	8	10	2	13	7	3	0	8	7	12	7	7	11	30	25	27	17	7	11	29	9	11	2	16	17	26	14	11	16	8	10	3	3	22	20	7	9	22	18	4	10	10
OLR1_13618	0	0	0	0	0	0	0	0	0	0	0	3	0	0	0	0	0	0	0	0	0	0	0	0	0	0	0	0	0	0	0	0	0	0	0	1	0	0	0	0	0	0	0	0	0	0	0	0	0
PFKFB4_13625	46	35	50	54	55	52	29	45	52	43	33	40	45	35	35	22	48	27	42	23	53	49	98	130	68	50	23	21	34	44	22	40	36	43	114	105	202	191	134	124	22	30	33	30	30	27	28	20	41
GADD45G_13658	0	0	7	1	1	3	1	1	1	0	3	0	1	5	0	0	1	0	0	0	0	0	0	1	0	0	0	0	0	1	0	0	0	0	2	5	1	0	3	3	0	0	0	0	0	0	0	0	1
FMO1_13664	0	0	4	0	0	0	0	1	0	2	0	0	1	0	2	0	0	0	0	1	0	0	0	3	0	0	3	0	0	1	0	0	4	0	0	0	0	1	1	0	2	0	1	0	0	1	0	0	1
ZWILCH_13665	732	676	756	856	906	993	484	472	495	610	444	470	418	352	507	559	645	629	563	585	981	1066	1199	1295	857	823	575	515	772	844	405	382	665	748	515	620	630	686	553	543	523	524	563	503	452	443	364	472	955
FN1_13666	160	119	298	253	266	209	158	172	191	198	149	134	204	176	178	167	138	192	261	196	372	373	400	386	307	273	283	217	463	623	203	213	324	339	1318	1621	1104	942	997	1031	406	426	234	225	646	649	791	821	212
DNAJB4_13682	225	203	479	599	458	538	416	494	475	562	283	453	335	373	400	388	338	336	227	309	283	340	403	533	414	401	288	223	228	305	263	236	292	322	172	165	201	226	249	228	521	586	290	309	173	189	131	132	623
NRCAM_13710	3318	2961	4648	5534	3732	4117	3316	3450	4659	5812	3374	3396	4000	3570	3515	3482	3671	3404	4031	4154	6268	6623	5461	5903	3927	3706	5380	4345	3736	4100	4104	4058	4755	5317	2829	3594	2603	3461	2877	2683	4790	5129	4219	3827	3564	3345	2382	2885	3856
SLC7A5_13711	1743	1609	1534	1592	1526	1464	558	583	1027	1095	879	775	909	873	1168	1116	1407	1393	1601	1565	1582	1440	1262	1499	1079	1075	1590	1157	1229	1297	1512	1533	1773	2037	1718	1826	1325	1144	721	695	1643	1474	3020	2953	1473	1349	1423	1611	2380
DPPA5_13721	0	0	0	0	2	0	0	2	0	0	1	0	0	0	1	0	0	1	0	0	1	0	0	0	0	0	0	0	0	0	0	0	1	0	0	0	0	0	2	0	0	0	0	1	0	0	0	0	0
KLK2_13727	1	1	3	3	0	0	0	0	0	1	0	0	1	0	0	2	0	0	0	0	0	0	2	0	1	1	0	0	0	1	0	0	0	0	1	1	1	0	0	1	0	0	0	1	0	0	0	0	0
KRT6A_13729	0	2	0	0	1	1	0	0	0	0	1	2	0	0	1	0	0	0	0	3	2	0	0	0	1	0	0	1	0	0	0	0	5	2	0	0	0	3	0	0	1	0	0	0	0	0	0	0	0
PTPRM_13744	50	73	58	87	53	50	32	26	76	83	42	64	67	73	58	33	47	42	63	50	35	49	44	47	31	29	37	25	44	72	49	52	38	36	27	26	25	20	31	21	90	95	41	49	66	70	29	42	55
FCGR3A_13772	0	0	0	0	0	2	1	0	3	0	0	1	0	0	0	0	0	0	0	0	0	0	0	0	0	0	0	0	0	0	0	0	0	0	0	0	1	0	0	1	0	0	0	0	0	0	0	0	0
STRBP_13783	212	196	289	297	316	315	180	201	252	281	251	290	241	192	235	200	271	227	229	266	146	153	187	204	159	133	282	258	274	286	180	190	148	161	66	99	95	91	80	77	224	240	225	202	174	146	91	76	328
POLR2H_13796	107	78	192	198	131	142	101	93	182	196	63	110	142	106	85	100	114	108	80	103	106	138	116	129	93	89	81	65	110	133	85	85	77	109	150	129	95	113	143	124	145	99	119	96	113	102	68	74	157
PPM1B_13805	85	92	129	153	138	116	92	77	96	149	122	95	105	98	70	75	85	54	133	95	110	99	103	133	99	97	111	112	102	151	84	104	103	112	86	99	100	77	101	101	123	83	187	124	117	122	78	89	125
SCN2A_13807	50	59	149	129	108	87	59	85	75	71	72	92	87	84	110	88	47	53	73	63	47	40	55	55	45	63	53	45	71	67	48	42	31	50	27	20	40	29	40	46	52	62	48	44	49	39	27	31	68
CREM_13826	85	62	124	112	115	112	84	67	104	107	55	70	98	79	91	91	58	71	88	79	102	76	101	106	74	86	98	59	78	92	81	66	83	95	126	159	120	81	126	104	80	87	99	94	122	90	119	101	100
CLEC7A_13828	2	0	0	2	0	0	0	0	0	0	1	0	0	0	0	0	0	0	0	0	3	2	2	0	0	0	0	1	0	0	0	0	0	2	1	2	2	3	0	1	0	2	0	0	0	0	0	0	0
TRAT1_13833	0	0	0	1	0	2	2	2	2	0	0	0	1	0	0	0	0	0	2	0	0	0	0	0	0	0	0	0	0	0	0	0	0	0	0	0	1	1	2	1	0	0	0	0	0	1	0	1	0
AMY2A_13847	13	18	41	67	34	33	20	35	26	37	47	53	51	26	27	23	23	16	29	31	24	14	17	17	13	26	30	37	34	44	22	27	13	14	14	12	17	3	17	14	31	25	43	45	28	18	16	14	24
BSCL2_13859	0	0	0	1	0	1	0	0	0	2	0	1	0	0	0	0	2	0	0	0	1	1	0	0	0	0	1	0	0	2	0	0	0	0	1	1	0	1	0	0	0	0	0	0	1	0	0	0	0
TREM1_13872	0	5	1	3	2	6	4	3	7	14	5	3	3	6	2	4	13	8	11	4	4	3	3	8	24	10	8	14	8	14	6	3	2	4	2	0	2	2	1	3	11	8	33	29	4	10	1	1	12
TIMP1_13877	481	385	797	752	698	711	544	550	507	560	854	764	587	588	499	510	442	421	678	655	861	730	767	767	635	703	789	605	871	899	574	629	697	797	572	678	658	551	773	779	652	634	739	760	758	649	606	599	550
WDR72_13887	0	0	0	0	0	0	4	3	1	0	0	0	0	0	0	0	0	0	2	0	1	0	1	0	0	1	2	1	0	0	0	1	0	0	0	0	1	0	1	1	1	0	0	0	0	0	2	0	0
PRR5_13913	0	0	0	0	0	2	0	0	1	0	1	0	0	0	0	0	0	1	0	0	0	0	0	2	0	0	0	0	1	1	1	0	0	0	0	0	0	0	0	0	0	0	0	0	0	0	0	0	0
CD52_13919	0	0	1	0	0	0	0	0	0	0	0	1	0	1	0	0	1	0	0	0	1	0	0	0	0	0	0	0	0	0	0	0	0	0	0	0	0	0	0	0	0	0	0	0	0	0	0	1	0
SLC1A3_13929	296	279	399	577	299	326	264	324	514	580	574	504	538	420	337	281	332	302	604	411	539	499	503	560	348	321	525	525	311	560	312	387	352	410	324	393	390	280	317	279	403	460	266	202	358	342	237	246	447
PF4_13958	0	0	0	0	0	0	0	0	0	0	0	0	0	0	0	0	0	0	0	0	2	0	0	0	2	0	0	1	0	0	0	0	0	0	2	0	1	0	0	0	0	0	0	0	0	0	0	0	4
MUC3A_13976	1	0	0	0	0	1	1	0	0	0	0	0	1	0	2	0	0	1	0	0	0	0	1	2	0	0	0	0	0	0	1	0	0	2	0	0	0	0	0	0	0	0	0	0	0	0	0	0	0
ACHE_13991	93	108	144	129	156	117	111	132	168	200	97	126	138	129	113	99	122	95	103	117	195	181	159	161	120	136	152	145	74	88	194	149	173	224	519	619	363	385	333	322	238	190	86	60	197	176	235	229	143
CD163_14001	0	0	0	2	0	0	0	0	0	0	0	0	0	0	0	0	0	0	0	0	0	1	2	0	0	0	0	3	0	0	0	1	0	0	0	0	0	0	0	0	4	0	0	3	1	2	1	0	0
AIFM2_14009	79	63	114	127	107	100	68	78	74	74	73	79	52	74	88	54	94	66	70	75	76	77	151	133	135	155	58	58	71	83	81	63	50	69	105	151	186	196	241	204	59	39	254	272	60	59	65	73	117
TMC5_14015	0	0	0	0	0	0	2	0	0	0	0	0	0	0	0	0	0	0	0	0	0	0	0	0	0	0	0	0	0	0	0	0	0	0	0	0	0	0	0	0	0	1	0	0	0	0	0	0	1
HSPA5_14023	1236	1174	1871	2039	1946	1885	1550	1542	1635	1910	1514	1614	1296	1393	1367	1296	1698	1640	1390	1534	1879	1772	2222	2406	1676	1770	1497	1217	1768	1593	1239	1263	1597	1911	1460	1535	1864	1884	1859	1714	1685	1521	3128	3146	1285	1354	1463	1523	1661
FSTL3_14058	5	5	2	1	1	1	2	0	2	3	4	3	2	1	3	2	2	9	8	5	8	1	2	2	2	5	3	2	0	2	12	15	5	9	6	7	10	3	5	9	5	9	1	0	7	6	6	3	5
TUBB2A_14065	1612	1629	2106	1898	1783	1799	995	954	1465	1488	1539	1622	1428	1450	1449	1478	1459	1414	1771	1876	2093	1726	1280	1304	877	828	2048	1483	1196	1168	1966	2089	2287	2584	1117	1223	983	857	847	700	2028	1872	717	669	2029	1814	1332	1598	2171
TNFRSF1B_14069	0	0	2	10	2	5	1	2	0	0	5	8	1	0	6	4	3	0	0	1	36	32	45	46	59	48	0	1	16	16	1	4	6	9	20	27	69	58	79	89	0	1	45	37	0	1	10	4	3
PECAM1_14079	1	0	31	37	11	31	20	23	19	15	10	4	19	12	24	17	1	3	0	2	1	2	5	4	0	3	15	2	2	8	3	4	2	3	10	5	5	5	4	7	7	9	1	0	7	9	10	3	3
RIPK3_14085	1	0	0	0	3	0	0	0	0	0	0	0	0	0	0	0	0	0	0	3	10	2	0	2	2	1	0	1	3	0	0	1	0	2	2	8	6	7	8	8	0	0	0	0	2	0	3	2	0
RAD54L_14089	64	92	97	96	101	112	33	43	34	47	29	37	36	31	50	53	87	60	69	72	237	237	264	342	139	144	29	24	101	99	33	25	129	139	69	77	131	118	105	118	39	45	36	42	33	39	48	44	110
PPP1R15A_14098	421	433	655	689	540	577	320	388	763	861	450	476	532	475	461	501	465	360	470	458	638	707	671	845	411	392	1095	936	463	464	981	890	726	806	1130	1238	660	754	411	453	1877	1723	2110	1733	1446	1392	1127	1214	644
SLC7A11_14100	36	21	33	39	26	40	17	10	27	50	41	38	38	35	21	26	42	40	49	35	29	23	19	33	7	12	57	47	33	34	27	29	38	49	5	8	4	5	8	7	31	30	178	190	30	26	6	5	47
CIAO2A_14110	1011	951	1598	1627	1525	1701	777	872	1381	1630	729	924	697	703	932	846	1007	971	481	847	980	1197	1482	1545	857	798	1200	919	868	681	612	619	587	619	999	1195	1061	1327	825	812	1288	1023	730	718	687	655	620	684	1123
NSG1_14124	0	0	1	0	0	0	3	0	1	0	0	1	2	4	0	3	3	0	0	2	1	1	1	0	0	0	0	3	0	4	0	0	0	0	0	0	1	0	0	0	0	2	0	0	1	2	0	0	2
NDUFA4_14125	66	43	81	67	82	74	68	49	88	82	101	87	68	82	66	52	49	52	118	100	40	33	57	59	45	38	101	83	108	105	64	56	54	78	32	65	53	14	34	19	87	71	56	55	57	75	49	60	89
ZNF367_14143	104	98	128	149	161	124	45	42	56	66	54	67	53	27	73	59	100	80	118	112	328	337	175	203	87	90	26	32	97	139	63	42	245	287	124	116	124	132	93	119	58	37	49	50	48	38	75	77	160
ATRX_14146	412	304	642	595	530	487	347	315	525	576	467	483	434	467	376	379	442	402	429	433	344	357	354	354	239	292	704	500	530	565	380	349	358	361	225	298	212	181	221	226	573	494	344	338	428	394	245	255	538
SLC2A1_14159	66	52	31	44	84	52	24	27	41	58	45	43	27	23	29	28	40	48	50	48	57	48	95	104	61	49	43	26	79	84	26	31	46	31	78	79	106	112	72	90	66	47	62	73	33	20	5	9	102
ZWINT_14161	49	34	51	46	77	62	20	13	26	26	32	28	26	19	24	28	36	48	24	51	84	90	91	83	63	54	30	16	74	47	19	18	46	44	25	27	54	30	44	46	39	27	20	13	37	18	23	30	60
CD34_14176	746	700	381	389	428	434	213	189	520	591	406	437	404	386	339	335	673	639	585	616	838	853	1460	1592	1348	1209	743	541	954	1013	400	380	587	610	320	397	537	530	648	577	495	483	651	611	378	350	290	306	891
MBP_14178	0	0	1	2	0	0	0	2	0	2	0	0	1	0	1	0	1	0	0	1	0	0	0	0	0	0	0	1	0	0	2	0	1	0	1	0	0	0	0	0	0	0	0	0	0	1	0	0	0
MSI2_14200	90	88	156	214	148	167	113	147	139	180	223	167	161	127	101	89	106	113	262	142	67	76	90	82	77	95	193	170	188	370	117	136	85	64	31	42	58	29	70	62	137	166	208	149	104	112	34	21	160
GREB1_14205	5	4	9	6	6	7	7	8	17	9	10	14	23	10	6	7	13	6	10	7	7	4	5	7	1	8	12	7	7	10	4	7	5	0	9	3	7	7	3	16	5	14	5	8	9	5	3	3	8
ANXA5_14212	2363	1958	3541	3398	3375	3168	1952	1891	2663	3092	3031	3122	2500	2378	2094	2203	2205	2343	2843	2688	3305	2957	3220	3152	2243	1997	4026	3240	3601	3829	2491	2671	2633	3075	2660	3191	2989	2335	2487	2273	3443	3034	2377	2245	2944	2539	2180	2355	3004
C2CD5_14220	70	88	127	142	95	99	100	82	86	112	89	121	69	75	78	56	83	69	89	95	92	85	121	129	118	100	112	71	110	103	66	46	73	84	39	81	70	77	108	76	64	85	80	77	50	58	36	53	96
EIF3D_14221	65	62	114	94	96	105	54	61	84	79	99	88	63	74	73	73	62	75	86	87	90	83	103	98	71	68	124	74	137	110	66	76	98	96	64	86	73	70	62	43	82	77	69	62	110	73	61	75	80
EIF3A_14222	382	342	502	513	504	474	302	242	457	454	485	449	420	437	334	349	346	401	661	516	484	425	374	495	315	330	387	248	545	719	422	497	475	575	310	336	345	279	347	254	511	485	617	529	566	559	323	356	677
ATP1A2_14227	1	0	0	0	0	0	0	0	0	2	0	1	0	0	0	0	0	0	1	1	0	0	0	0	0	1	0	0	0	0	0	1	0	0	0	1	0	0	0	0	0	2	3	4	0	0	0	0	0
RCSD1_14231	0	0	0	1	0	0	1	1	0	3	1	0	0	0	0	0	0	1	0	0	1	0	2	2	1	0	2	0	0	0	2	0	1	2	0	3	0	2	1	1	0	0	2	0	0	1	0	1	1
CENPK_14270	824	702	920	1041	1181	1118	498	551	521	546	474	508	399	338	678	651	815	689	734	765	1637	1758	1974	1923	1168	1061	555	478	894	954	389	376	873	886	561	581	744	914	780	702	600	599	431	407	334	343	434	379	1154
POLE3_14273	227	209	258	301	274	277	167	148	185	223	224	217	166	173	168	157	202	211	299	268	364	343	357	379	270	224	214	190	301	418	169	206	272	321	214	203	293	207	183	163	188	184	264	232	203	171	165	189	310
LMO1_14295	0	0	0	0	0	0	0	0	0	0	0	1	0	3	1	0	0	0	0	0	0	0	0	0	0	0	0	0	0	0	0	0	0	0	0	0	0	0	0	0	0	0	0	0	0	0	2	1	3
CHKA_14315	662	625	721	820	924	814	511	537	595	682	614	698	494	454	626	574	684	545	671	657	344	372	490	542	356	367	445	383	557	633	321	321	337	381	206	213	294	344	297	275	417	394	506	464	234	216	156	154	832
CCDC80_14320	260	244	273	304	292	197	156	116	278	340	235	242	283	265	216	216	257	300	358	330	340	279	338	329	263	215	341	269	199	249	181	224	261	321	147	195	176	141	157	136	324	255	215	191	254	209	161	156	319
CXCL8_14324	76	105	40	44	44	42	31	35	79	82	37	28	39	35	58	38	216	219	429	411	12021	10236	11193	11676	7228	6946	30279	24135	607	663	27525	26899	15421	17593	19885	19444	24476	23766	14493	13395	18260	19230	3454	3309	22235	18867	16897	18566	146
BAK1_14344	1	0	0	2	1	0	0	3	1	3	0	1	0	1	2	1	0	0	0	0	0	0	0	1	0	0	1	1	0	1	1	0	1	0	2	0	0	0	2	0	2	1	3	1	2	0	1	2	0
ABCB10_14348	12	15	28	24	22	18	9	15	18	25	27	27	19	21	15	16	18	17	28	28	16	14	14	21	25	21	24	14	38	42	26	16	11	22	14	26	28	18	17	15	34	16	31	26	23	21	21	21	34
ATP6AP1_14351	150	154	227	294	200	205	130	151	192	247	234	176	266	216	144	139	143	149	365	206	161	154	176	173	149	157	119	129	215	308	155	172	154	191	149	193	194	119	150	152	210	198	201	156	224	202	107	132	249
OTX2_14359	0	0	0	0	0	0	0	0	0	0	0	1	0	0	0	1	0	0	0	0	0	0	0	0	0	0	0	0	0	0	0	2	0	0	1	0	0	0	0	0	0	0	0	0	0	0	0	0	0
GIN1_14366	9	9	20	5	20	26	9	11	14	8	25	14	11	15	8	10	13	9	19	19	12	9	5	6	8	11	12	9	13	18	11	4	5	7	2	4	6	5	3	6	6	9	6	13	12	5	10	6	7
EPS15_14377	241	211	334	424	357	301	225	199	275	309	336	262	329	248	249	209	208	198	328	231	209	252	297	242	185	164	313	326	275	415	201	248	214	253	268	323	251	228	264	232	343	286	459	328	307	292	241	260	303
ATG4C_14397	153	130	205	212	222	182	158	172	186	189	188	190	151	163	159	140	179	162	169	205	127	134	166	172	112	113	182	127	161	192	101	113	121	141	41	57	70	66	77	118	128	126	131	121	112	89	65	61	226
CYP2B6_14401	0	0	2	0	3	0	0	0	0	3	0	1	0	2	1	0	0	0	0	2	1	1	0	0	0	1	0	0	0	0	5	0	0	0	2	1	1	0	0	0	2	1	0	1	0	1	0	1	0
PLAGL1_14406	14	3	14	29	27	16	18	14	10	6	14	7	23	12	10	4	4	5	23	11	8	10	19	12	8	9	11	19	8	17	12	8	7	15	19	27	37	17	17	14	9	16	20	16	14	11	12	18	12
JAML_14411	0	0	0	1	1	1	0	0	0	0	0	0	1	0	0	2	0	0	0	0	0	0	0	0	1	0	0	0	0	0	1	0	0	0	0	0	0	0	0	0	2	0	0	0	2	0	0	0	0
VTN_14427	0	0	2	0	2	0	0	1	1	2	0	0	1	0	0	1	1	0	0	0	0	0	0	0	0	0	1	0	0	0	0	0	0	0	1	0	2	1	0	0	0	0	0	0	0	1	0	0	0
CCL11_14453	0	0	0	0	0	0	0	0	0	0	1	0	0	0	0	0	0	0	0	0	0	0	0	0	0	0	4	3	1	2	0	0	0	1	0	1	2	0	0	0	0	1	0	1	0	0	0	0	0
LMO3_14482	1	6	0	6	6	2	4	6	5	3	1	1	2	2	3	4	7	5	10	2	1	1	1	0	0	0	5	2	4	7	2	1	0	1	2	1	1	1	1	0	1	5	1	4	0	0	0	1	10
PINK1_14500	305	366	490	516	335	372	304	317	591	675	405	414	424	357	317	306	411	333	327	374	211	188	155	183	143	181	149	147	293	294	338	282	233	275	146	155	100	131	117	93	500	463	148	141	387	355	173	161	429
HDAC9_14516	7	1	6	5	4	3	10	6	5	9	7	13	1	5	7	3	2	6	6	8	23	13	18	27	14	24	2	6	15	17	16	6	17	19	10	6	13	10	18	16	1	8	27	23	11	10	14	12	5
PRKG1_14530	315	254	335	397	266	268	214	260	569	698	274	358	405	330	262	239	328	254	273	327	123	162	178	172	116	91	532	432	143	131	378	315	221	199	88	133	96	142	95	105	478	461	76	75	372	331	145	175	381
PLPPR4_14532	0	1	1	0	0	1	1	0	1	0	5	3	2	0	0	0	1	0	2	1	0	0	0	1	2	0	0	3	2	0	0	0	0	0	0	0	0	0	0	0	0	0	2	1	2	0	1	0	0
H1-4_14544	3325	3141	3066	3374	4165	4254	2005	1898	2388	2538	2624	2690	1908	1757	2017	2116	2706	2610	2530	2763	2709	2553	7345	7548	4392	4132	2114	1778	4836	5199	1400	1448	1738	1889	1573	1683	3456	3705	3404	3180	2455	2273	2956	2796	1701	1410	1161	1293	4344
PRKAB1_14557	52	49	77	70	58	78	45	35	56	63	66	75	68	59	61	62	54	43	66	71	46	37	63	83	55	53	46	62	79	83	48	42	68	60	35	56	41	48	56	39	50	46	82	100	53	46	48	36	83
MS4A1_14568	0	0	1	0	0	0	0	0	0	0	1	0	0	1	0	3	0	0	0	0	0	0	0	0	1	0	0	0	0	0	0	3	1	0	1	1	0	0	0	1	0	1	0	0	1	0	0	0	0
SRD5A1_14585	337	291	629	729	480	554	359	354	630	704	520	555	590	579	487	436	345	324	454	454	452	396	305	333	240	236	556	430	319	287	343	369	382	444	368	396	252	194	224	208	750	624	331	287	676	638	480	474	460
SST_14586	6	2	1	1	1	1	5	4	4	2	6	5	7	6	6	5	4	6	5	6	2	1	1	3	3	5	1	2	2	4	2	9	3	8	2	0	3	3	9	4	1	1	8	9	5	11	9	4	3
PRC1_14588	167	166	209	191	405	341	190	210	139	179	191	199	145	120	131	129	229	198	187	184	162	207	379	403	314	302	115	101	269	327	117	122	158	173	100	111	165	146	192	172	207	165	167	143	154	166	109	92	305
EFNA1_14597	166	188	273	320	98	136	149	166	327	340	187	223	145	131	140	121	318	179	187	223	824	914	1028	1186	780	732	3598	2965	272	229	1285	1152	580	650	1588	1595	638	751	527	429	3378	3121	98	89	1588	1444	1090	1249	260
FMO3_14602	0	0	0	0	1	0	0	0	0	0	0	0	0	0	0	0	0	0	2	0	0	0	0	0	0	0	0	0	0	0	0	0	0	0	0	0	0	0	0	0	0	0	0	0	0	0	0	0	1
INSC_14616	0	0	0	0	0	0	0	0	0	0	0	0	0	0	0	0	0	0	0	0	0	0	0	0	0	0	0	1	0	0	0	0	0	0	0	0	0	0	0	0	0	0	0	0	0	0	0	0	0
ASTN2_14623	41	28	62	31	36	33	37	31	63	40	42	45	29	39	32	31	54	46	39	58	38	25	46	39	27	32	39	27	55	49	16	17	22	19	7	9	7	10	18	13	57	34	37	55	32	21	11	5	34
VGLL1_14626	0	0	0	0	0	0	0	0	0	0	0	0	0	0	0	0	0	0	0	0	0	1	0	0	0	0	0	0	0	2	0	0	2	0	0	0	2	0	0	0	0	0	0	0	0	2	0	1	0
LEF1_14627	90	90	88	122	66	108	37	43	76	90	50	70	99	75	77	93	104	84	104	92	436	407	397	377	217	203	190	153	286	298	320	327	292	316	390	363	229	216	136	143	131	133	155	122	288	294	323	339	154
ELMOD1_14644	81	46	184	193	147	144	137	155	149	193	174	150	142	98	110	116	69	73	99	75	13	12	24	39	26	17	151	126	65	59	66	90	20	24	19	21	21	17	25	17	160	126	56	34	72	74	17	23	125
ARNT_14705	313	295	388	443	377	369	282	272	395	454	392	369	314	350	278	261	332	290	337	273	251	201	258	255	289	256	335	244	417	421	312	248	199	211	176	236	200	171	298	225	368	333	264	305	307	254	211	206	421
KIF23_14714	374	314	308	384	564	490	237	229	186	212	207	232	231	186	220	234	314	323	284	300	313	304	575	660	508	484	242	174	506	488	155	165	315	305	136	177	235	217	309	250	239	213	290	326	206	149	160	216	555
LRRFIP2_14725	34	44	56	69	71	78	25	24	45	37	36	32	46	32	32	38	43	41	45	30	84	80	95	79	43	48	91	61	43	48	77	65	70	70	72	63	51	70	47	49	50	47	46	36	66	55	66	53	46
PIK3AP1_14739	0	0	8	6	17	14	6	3	1	1	4	8	4	9	8	5	0	0	0	0	21	12	19	13	10	11	2	0	1	1	0	3	11	15	14	26	22	27	24	17	1	2	4	1	7	4	13	13	1
PEG3_14757	0	0	0	0	0	0	0	0	1	0	0	0	0	0	1	0	0	0	0	0	0	1	2	0	0	0	0	0	0	0	0	0	0	0	2	2	0	0	0	0	0	0	0	0	0	0	0	2	0
SLCO1B1_14765	0	0	2	0	1	4	2	0	2	0	0	2	2	1	0	4	0	0	0	0	0	0	3	0	0	0	0	1	2	0	0	0	0	0	0	3	0	0	0	0	3	0	0	0	0	1	0	0	1
SLC38A1_14804	56	59	66	76	71	57	51	45	75	62	49	62	53	54	35	38	48	52	100	70	63	54	59	69	45	42	68	79	113	114	50	47	48	73	31	28	29	23	29	29	53	60	1105	881	47	49	43	35	82
CA9_14814	0	0	0	0	0	0	0	0	0	0	0	1	0	0	1	0	0	0	0	0	0	0	0	0	0	0	2	0	0	0	0	0	0	0	0	0	0	0	3	0	0	0	0	0	1	0	1	0	0
NOD2_14820	1	1	3	3	0	1	0	1	4	5	2	2	2	0	0	2	0	0	0	1	3	3	12	11	14	12	2	1	0	1	16	7	4	5	25	24	22	16	26	29	2	3	2	0	17	17	13	15	2
TINAGL1_14822	0	0	2	0	2	0	1	0	0	1	0	1	1	1	1	0	4	0	2	0	0	1	0	0	1	1	0	0	4	5	0	0	0	0	1	0	0	0	0	0	0	2	0	2	2	0	0	0	5
PPA1_14828	158	170	405	384	357	423	152	175	231	216	226	182	215	249	266	219	154	161	178	209	465	440	449	498	326	289	279	196	236	297	261	234	352	390	696	945	658	587	531	485	303	291	212	237	369	328	464	464	240
FAM83D_14832	46	35	41	44	68	57	31	30	14	19	49	31	33	26	20	13	32	48	39	32	42	40	87	81	81	72	19	16	56	81	12	20	37	24	12	22	37	28	51	42	19	20	44	32	25	11	19	20	65
ACTA2_14836	3772	3406	3616	3670	4104	4071	1382	1184	2720	3188	1530	1631	2307	2240	2370	2534	2643	3015	3242	3450	3116	2888	2030	2335	945	911	3619	2812	2848	2844	2508	2682	3151	3730	2845	3266	1780	1688	809	793	3645	3401	923	922	3086	2657	2386	2574	4651
GALNT3_14859	91	76	188	208	131	122	149	135	169	182	135	118	136	107	116	104	125	94	99	99	113	132	108	143	105	118	139	132	59	76	123	111	110	112	145	129	100	146	97	140	129	110	106	95	118	128	95	73	119
GOLGA2_14861	171	163	197	187	193	177	147	133	216	219	200	198	202	189	167	118	168	166	234	151	115	124	123	135	108	79	149	124	170	284	152	167	181	183	143	156	172	113	105	127	197	185	197	186	182	176	157	140	222
SBSPON_14886	0	0	3	2	3	3	2	2	0	0	5	1	2	1	1	3	2	2	2	1	0	0	0	0	0	1	3	0	0	3	1	0	0	2	0	1	0	2	0	1	2	1	1	1	1	1	0	0	1
LSS_14888	111	111	142	125	131	120	84	96	96	73	100	84	85	65	84	104	88	119	73	104	136	99	135	151	154	137	37	15	153	164	115	114	138	160	249	309	227	191	231	222	108	94	65	45	141	128	131	147	160
CARS1_14910	217	209	364	375	340	367	219	191	336	357	282	323	321	290	250	249	248	245	279	231	311	239	253	325	250	253	367	287	297	381	336	358	306	316	407	485	387	368	317	352	530	502	832	690	501	452	436	457	320
TNC_14940	5092	5236	12900	13772	10975	10810	9963	9787	10814	10972	10213	11076	8587	8196	7770	7747	5618	5336	6944	7079	12013	10800	8546	9381	6086	5844	12755	9914	7965	8775	10945	10435	8866	9956	13654	13695	12386	11686	10266	9318	14065	14720	6979	6790	13545	12408	10286	11002	7729
ID1_14943	1695	1772	1949	2003	1044	1172	850	933	2855	2878	782	875	1649	1605	1488	1399	1966	1710	1456	1701	457	440	551	694	453	513	482	389	917	803	222	204	275	285	150	196	318	349	343	345	505	476	491	546	119	100	86	86	2059
SLA_14953	0	0	0	1	0	0	0	0	0	0	0	0	0	0	0	1	1	0	0	0	0	0	0	0	0	0	0	0	0	0	0	0	0	0	0	0	0	0	0	0	0	0	0	0	0	1	0	0	0
IL23A_14962	1	1	0	0	0	0	0	0	0	0	1	0	1	0	1	0	0	0	2	1	2	1	3	2	3	1	2	2	1	3	0	0	0	0	1	3	2	1	2	3	0	1	0	2	0	0	1	2	0
LGALS1_14971	22	28	16	35	27	27	22	18	27	19	32	38	17	35	20	18	23	26	30	28	26	45	78	81	70	46	21	15	72	94	28	16	28	21	31	38	67	40	66	82	26	35	33	59	31	40	35	25	39
VSX1_15004	0	0	0	0	2	2	1	0	0	2	0	0	2	0	0	0	1	0	3	0	1	1	0	0	1	1	0	1	0	0	0	0	1	1	2	0	1	2	0	0	2	2	0	1	0	2	0	1	0
ITGB3_15012	57	55	67	72	72	73	54	47	55	66	68	54	31	43	71	41	77	80	95	84	134	134	123	136	51	59	72	48	106	107	66	51	131	122	28	38	43	43	54	35	61	51	177	144	58	54	35	27	79
CFL2_15015	78	84	110	127	98	114	93	80	138	119	72	74	96	90	84	77	104	58	88	99	59	72	93	67	50	45	150	107	93	108	60	43	42	51	42	66	36	64	47	45	223	192	83	62	134	131	65	54	143
HSF2_15018	38	39	43	25	49	38	40	25	45	50	48	52	35	37	17	34	33	27	46	46	38	30	46	60	41	23	30	25	50	58	19	14	30	35	14	33	12	14	30	26	33	25	55	54	30	20	15	23	72
MSL2_15027	24	17	30	22	34	36	24	25	24	43	32	26	29	26	11	25	28	26	25	25	27	31	40	40	28	44	29	29	38	50	17	27	35	34	20	23	27	25	27	21	35	21	47	42	35	17	16	25	39
HSPB8_15039	64	35	107	107	90	51	65	58	121	130	82	59	81	92	65	53	46	59	62	76	19	29	45	60	52	31	99	97	67	43	65	40	23	29	48	55	32	32	51	39	130	98	40	43	96	82	43	53	77
CBWD5_15051	44	35	67	44	60	54	25	36	38	81	19	39	26	50	35	17	56	32	18	46	38	52	55	82	31	40	39	41	49	31	40	21	17	20	21	51	48	46	34	40	55	39	56	50	27	12	32	31	59
LHCGR_15074	0	0	2	0	0	0	0	0	0	0	0	0	0	0	1	0	1	0	0	1	1	0	0	2	0	0	1	0	0	0	1	2	0	0	0	1	1	3	0	2	0	1	0	0	0	0	0	1	0
GDF7_15077	1	0	0	1	0	1	0	0	1	0	1	0	0	1	0	1	1	0	0	1	1	0	1	1	1	2	0	1	1	0	1	0	0	0	1	1	0	0	0	0	3	1	0	0	2	4	1	0	0
SLC30A3_15096	1	0	0	0	0	0	0	0	0	0	0	0	0	0	0	1	0	0	0	0	0	0	1	0	0	0	0	0	0	2	0	0	0	0	0	0	0	0	1	0	0	0	1	0	0	0	0	0	1
HGF_15098	0	0	30	40	32	13	24	4	7	13	3	0	11	8	11	19	0	0	3	1	11	6	2	11	2	4	3	4	0	0	1	5	8	3	89	124	154	98	103	140	9	3	2	0	7	6	69	65	0
LRRC34_15131	8	8	8	4	7	9	4	4	9	10	7	12	14	10	7	17	9	8	12	7	3	0	7	6	6	9	17	9	8	5	5	8	1	6	4	2	9	11	0	2	10	9	3	6	6	12	2	5	6
CYP4B1_15139	0	0	1	1	0	0	1	0	1	0	0	0	0	0	0	0	0	0	0	0	0	0	0	0	1	0	0	7	0	0	0	1	0	0	0	2	0	1	0	0	0	0	0	0	0	0	0	0	0
CYP2C8_15146	9	2	6	4	11	15	4	5	2	7	1	4	8	3	4	6	3	2	2	3	7	9	8	20	9	7	4	5	0	2	7	18	14	4	13	8	10	8	4	5	0	3	1	1	18	25	19	11	3
STIL_15150	11	8	12	18	17	21	3	5	7	8	14	11	3	8	9	3	14	14	10	19	19	24	31	19	10	24	10	1	11	10	5	9	19	20	8	7	22	14	18	12	11	6	3	2	7	8	14	9	18
EI24_15156	1125	953	1377	1468	1345	1368	812	817	1068	1265	897	985	875	890	968	898	1113	1064	901	1084	1103	1090	1203	1332	871	884	1265	946	1388	1311	900	857	935	1035	667	766	770	716	629	643	1123	1092	920	815	959	782	695	793	1311
TF_15172	3	2	14	4	8	6	8	2	11	12	1	12	8	2	8	6	1	2	7	2	1	3	0	2	2	1	7	4	4	3	0	5	3	7	1	2	3	2	3	0	6	6	1	1	5	10	1	5	4
UGT2A3_15183	0	1	0	0	0	0	0	0	1	0	0	0	1	0	0	0	0	1	0	0	0	0	0	0	0	0	0	2	0	0	0	0	0	0	1	0	0	0	0	0	0	0	0	0	0	0	0	0	0
PARP14_15187	441	396	6928	6934	5308	5498	3763	3596	1802	2001	1581	1811	2857	2762	4942	4886	693	577	347	470	10473	9296	8420	9084	5101	4977	1285	1037	920	817	2954	2578	6051	6638	15289	15088	10744	10721	8248	7650	3010	2866	2074	2027	5808	5597	8929	9748	575
DENND3_15196	2	2	3	2	1	1	7	1	2	2	2	3	2	4	2	2	0	0	1	1	10	5	7	6	6	7	1	0	0	0	9	3	7	5	22	15	17	18	7	9	3	8	2	0	7	5	6	8	1
ZNF555_15210	211	137	236	286	187	213	158	165	276	288	195	227	214	184	147	150	185	154	176	172	107	101	117	112	127	145	287	252	186	187	159	153	98	85	66	82	71	77	85	75	272	245	166	133	150	138	76	74	271
CMPK2_15212	5	4	70	61	69	62	40	39	18	37	10	20	48	52	52	46	2	3	6	4	318	215	300	362	262	270	2	3	4	7	62	58	210	230	302	326	419	281	413	391	22	20	28	26	110	113	182	184	5
IDH3A_15224	639	622	670	784	725	799	467	503	612	697	624	544	676	524	534	588	522	530	694	632	654	619	710	709	507	465	755	741	545	743	568	622	658	712	576	635	712	648	508	484	655	739	1184	867	676	617	506	618	927
ABCA8_15229	11	3	20	23	14	8	13	16	25	26	30	31	19	18	10	15	7	13	25	21	3	9	5	6	5	9	28	23	6	11	11	14	11	12	6	8	1	3	8	3	14	23	6	9	16	21	5	10	6
AP3M1_15244	1540	1565	1967	2174	1911	1943	1336	1386	1701	1917	1281	1506	1343	1228	1466	1264	1552	1333	1296	1398	1521	1513	1683	1882	1287	1211	1681	1464	1364	1541	1141	1034	1189	1273	1319	1397	1218	1381	1252	1132	1679	1686	1149	1129	1273	1158	1040	1052	2006
SLC51A_15250	0	0	1	2	0	1	0	1	0	0	0	0	0	0	1	1	0	0	1	0	2	1	2	1	0	1	0	1	0	0	0	0	2	0	3	7	3	3	8	2	0	0	0	2	2	0	12	6	0
C16orf72_15264	312	254	500	534	470	396	263	268	361	473	414	399	507	409	318	262	340	329	499	394	323	293	251	260	191	210	674	587	451	627	430	499	305	349	192	278	242	171	226	195	457	485	553	409	471	465	225	277	415
DHRS2_15289	0	4	7	1	1	8	4	0	1	5	2	0	3	1	0	0	4	1	1	1	2	0	0	5	4	6	4	0	9	2	0	0	0	0	0	0	0	0	7	3	0	0	4	7	0	1	1	1	2
DPP10_15296	181	145	221	295	183	181	135	152	277	444	196	225	308	259	189	154	300	222	315	273	155	180	132	202	123	166	314	295	325	299	204	194	141	195	107	140	90	76	78	98	288	284	184	133	175	156	90	124	318
CAV2_15304	654	658	800	835	654	814	375	317	667	785	328	442	411	440	573	582	551	547	395	622	793	808	672	713	337	349	974	864	421	318	753	610	635	749	722	808	525	666	369	342	757	742	469	518	638	571	578	655	722
CLDN1_15316	38	18	15	18	35	40	19	11	36	32	20	20	49	34	38	33	25	35	49	48	327	300	222	239	179	191	138	88	92	105	280	237	395	408	202	247	196	157	112	143	201	159	372	461	330	289	319	321	43
OLFML2A_15337	739	748	693	994	619	559	377	490	742	792	805	667	1036	665	445	558	774	811	1702	896	508	472	576	578	349	365	545	679	1182	2329	553	776	591	677	240	297	243	171	130	107	784	815	540	330	645	783	312	353	1187
KCTD9_15339	52	51	76	82	100	77	49	37	76	69	90	67	81	74	41	51	51	66	100	54	41	39	60	65	49	37	83	62	98	122	37	62	44	38	20	25	38	29	48	28	67	60	118	102	50	65	35	39	84
BNC2_15341	6	14	9	7	9	7	6	12	12	10	10	11	13	6	10	6	8	12	12	9	7	8	12	8	10	12	10	11	14	12	9	8	9	4	2	3	4	3	8	6	5	17	6	13	7	10	3	2	22
ERO1B_15346	33	27	57	51	45	37	55	42	63	69	52	41	42	52	41	35	43	30	62	39	61	69	34	57	44	48	65	45	47	52	43	38	63	74	42	66	50	47	47	39	55	45	24	28	45	65	58	69	48
MAP1LC3B_15391	1825	1555	2761	2796	2149	2151	1556	1585	2440	2652	2286	2363	2209	2037	1675	1689	1774	1751	2030	2065	1538	1611	1703	1701	1310	1266	2889	2445	1920	2144	1796	1943	1608	1796	1354	1603	1212	1125	1154	1083	2574	2346	5316	4909	2090	1880	1376	1485	2276
AR_15392	16	12	12	45	18	15	10	18	12	13	15	11	13	12	11	17	22	16	15	28	16	26	15	24	10	12	11	3	29	28	19	24	10	26	13	5	6	6	13	12	16	14	18	24	19	16	9	6	9
HOXD10_15423	2	1	4	0	7	2	4	0	2	4	2	1	3	3	5	1	1	3	0	2	3	0	3	0	2	1	1	0	6	1	1	1	0	0	6	0	1	3	0	2	1	1	2	2	1	0	2	4	0
S100A16_15424	19	13	27	54	23	36	34	18	18	14	20	45	30	25	20	19	19	21	26	26	17	15	13	30	10	16	26	16	30	63	15	26	19	26	16	34	31	19	31	19	28	20	41	41	27	25	23	20	25
SEMA3A_15425	863	802	915	794	1022	1050	625	499	880	1019	928	996	733	681	611	559	893	832	775	864	700	609	652	759	493	496	1143	788	898	913	666	628	640	627	407	452	476	433	505	461	956	865	860	1039	546	557	286	291	1197
HOXB1_15430	0	0	1	0	0	2	0	0	0	0	1	0	0	0	0	0	1	0	0	0	1	1	0	0	0	0	0	0	0	0	0	0	0	0	2	1	1	2	1	0	0	2	0	1	1	0	0	0	0
HOXB3_15432	30	50	55	47	39	61	33	46	48	28	30	25	29	22	31	31	43	49	49	38	17	25	24	35	22	33	1	1	40	52	31	14	17	39	14	17	23	26	21	34	17	11	20	22	19	10	7	6	96
C5orf49_15445	1	0	0	0	0	0	0	0	0	1	0	0	0	1	0	0	0	0	0	0	0	0	0	0	0	0	0	0	0	0	0	0	0	0	0	0	0	0	0	0	1	1	0	0	0	0	0	0	0
ONECUT1_15460	2	0	0	0	1	1	1	0	0	0	1	0	2	0	0	1	0	0	0	0	1	0	0	0	0	0	0	0	0	0	0	0	0	1	0	0	0	0	0	0	0	0	0	0	0	0	0	0	0
PTX3_15463	283	278	336	506	344	330	181	233	864	980	285	259	535	362	263	305	401	336	611	413	5289	4680	4118	4873	2904	3107	5120	5058	518	667	8016	8766	4761	5341	14609	14810	11618	10173	5258	4962	12277	14348	4349	2881	11719	12132	9756	11017	330
AP1M2_15493	0	0	0	0	0	1	0	0	0	0	0	0	0	0	0	0	0	0	0	0	0	1	0	0	0	1	0	0	0	0	0	0	0	0	0	0	0	0	0	0	0	0	0	0	0	2	1	0	0
FBXO22_15494	18	10	20	23	13	16	17	7	13	19	22	30	22	5	14	16	11	9	16	19	28	13	17	22	19	19	23	3	34	37	9	14	13	16	10	5	14	7	22	10	22	11	26	35	10	17	6	8	31
PEX3_15508	220	226	322	331	262	264	154	212	248	368	222	237	272	237	226	211	241	216	188	234	190	220	216	291	187	194	294	256	216	232	240	249	259	244	280	334	234	255	241	181	255	221	194	172	255	200	252	271	297
RARA_15510	7	21	22	14	14	23	10	13	9	12	14	18	11	8	12	10	14	15	45	12	5	1	14	6	6	8	0	1	20	23	8	7	4	11	3	0	6	4	7	6	7	8	32	10	3	6	2	1	25
TRAF1_15516	1	1	3	2	3	1	1	0	2	4	7	0	3	0	2	1	0	2	3	4	158	142	122	136	85	76	37	34	26	46	60	58	136	166	534	643	381	354	240	214	67	44	12	24	66	99	314	359	0
BRD2_15535	235	187	436	392	362	340	253	221	267	361	260	307	219	231	234	246	190	224	237	256	327	293	352	408	320	313	365	297	280	264	230	252	290	307	259	357	350	338	404	360	323	278	334	330	310	282	254	287	304
PSCA_15536	4	1	3	5	7	1	2	0	3	2	1	2	2	0	4	1	4	9	1	0	3	2	2	0	7	3	5	0	3	6	3	0	4	2	1	0	0	1	2	1	1	1	3	2	2	2	0	1	1
CLU_15548	85	76	216	227	148	143	155	128	195	281	326	309	212	176	133	125	92	128	207	165	111	101	69	102	86	81	182	141	81	89	201	161	109	140	85	115	71	51	83	52	166	173	88	88	188	196	93	98	92
CAVIN3_15553	0	0	0	0	1	0	0	0	0	2	0	0	0	0	0	1	0	0	0	0	0	0	0	0	1	0	0	0	0	0	0	0	0	0	1	0	2	1	0	0	0	0	2	0	0	0	0	0	1
CDH10_15582	28	30	36	46	20	27	27	18	35	67	28	24	36	26	22	21	32	31	37	44	5	7	3	8	12	6	24	36	18	38	6	4	10	2	3	5	4	3	1	3	39	20	25	14	8	16	7	7	27
GSC_15588	2	1	1	1	4	0	3	2	0	0	3	2	0	2	1	0	1	0	0	0	0	2	4	0	0	0	0	2	2	0	0	0	1	2	0	0	1	0	0	0	0	2	1	1	0	0	0	0	0
JKAMP_15608	159	133	222	174	223	238	183	129	215	202	178	166	188	167	156	180	167	151	83	211	147	120	142	147	136	99	227	148	139	108	123	119	163	182	130	113	113	101	129	132	184	174	97	142	171	121	145	156	209
CRY1_15619	536	478	875	1032	877	925	578	584	826	987	599	664	694	612	650	729	553	499	390	481	577	599	555	668	476	436	743	590	530	487	391	399	581	528	487	592	446	525	509	531	773	713	506	500	580	489	413	478	628
IL2RG_15624	0	0	0	0	0	0	0	0	0	0	0	0	0	0	0	0	0	1	0	0	0	1	1	1	0	0	1	0	0	0	0	0	0	0	1	0	0	0	1	1	0	0	1	0	1	0	0	0	0
TIMM23B_15627	37	39	80	49	65	71	22	33	49	51	56	66	54	53	27	22	46	48	27	52	64	58	60	45	44	35	94	48	71	50	46	39	50	66	44	42	40	39	33	37	52	51	62	77	53	52	30	45	64
WNT4_15630	9	10	11	8	5	3	7	8	6	9	4	6	6	2	2	5	11	14	5	9	12	4	3	13	9	16	3	5	6	5	4	5	3	7	22	17	29	29	20	14	2	6	5	3	7	7	3	17	16
SOCS3_15641	40	46	170	111	111	112	85	80	137	187	138	148	121	114	94	111	69	51	52	72	51	44	96	77	70	73	43	20	44	43	31	15	43	21	98	153	100	87	103	108	160	138	35	45	198	204	102	135	47
RMI1_15666	106	84	164	155	205	229	86	99	71	112	77	110	97	89	118	118	97	107	123	119	269	359	292	307	152	181	99	73	133	181	79	65	207	217	131	151	163	166	185	171	60	61	133	111	76	78	81	133	149
PIK3R1_15690	43	44	58	92	65	67	52	34	52	90	78	73	68	47	84	44	57	55	123	82	72	111	78	70	47	61	50	44	72	89	54	52	112	124	58	65	72	40	58	54	48	38	72	63	33	34	50	71	67
TCF4_15698	78	82	83	156	106	131	99	103	97	146	100	93	103	95	75	79	87	92	116	84	121	119	122	141	95	109	101	76	95	120	99	99	100	102	61	66	82	55	67	67	92	82	58	66	78	85	77	58	111
YWHAB_15704	1800	1857	2365	2796	2385	2547	1617	1777	2065	2295	1590	1790	1597	1367	1666	1733	1903	1738	1586	1674	2401	2460	2710	2741	1743	1646	1576	1475	2124	2207	1498	1454	1694	2045	3641	3666	3157	3795	2500	2368	2096	2034	2339	1982	1824	1788	2117	2312	2363
MTNR1B_15721	0	0	0	1	0	0	0	0	0	0	0	0	0	0	0	1	0	0	0	3	1	0	0	0	0	0	3	1	0	0	0	0	0	0	0	0	0	0	0	0	0	0	1	0	0	0	0	0	0
CXCL6_15723	1	0	0	2	0	0	1	1	0	1	2	0	0	0	0	1	4	3	2	2	13	13	17	14	14	22	3	1	9	3	8	6	9	14	6	11	12	14	27	9	6	2	12	8	1	4	3	4	3
APBA1_15724	82	57	96	123	91	112	66	62	185	196	88	85	195	187	79	74	65	58	59	79	45	30	69	51	45	52	110	93	139	164	39	43	30	28	85	84	58	66	66	62	133	129	75	61	116	98	63	90	87
TACC3_15729	604	573	727	739	889	854	385	390	399	400	438	415	312	268	390	414	594	561	404	545	705	639	981	1017	827	776	383	276	762	779	242	262	426	477	316	348	467	473	440	487	407	467	330	373	298	278	303	292	820
CXCL5_15735	0	2	2	2	0	3	2	1	3	8	1	8	2	2	2	0	5	3	3	0	21	20	28	23	16	17	9	0	17	15	3	3	8	12	24	18	17	12	15	14	4	4	19	10	7	3	8	8	0
TOPORS_15752	83	64	104	103	81	120	46	72	106	183	54	67	62	64	74	69	91	71	46	68	96	100	104	125	81	59	118	84	113	68	59	66	79	85	61	61	52	72	70	52	139	93	67	54	82	49	55	52	86
CPS1_15784	21	15	25	17	18	15	16	15	17	31	19	13	23	14	19	5	15	8	16	22	9	8	17	10	15	18	38	9	19	43	11	15	22	18	8	10	12	7	5	0	23	16	18	16	24	25	12	11	18
TSLP_15791	0	0	0	1	0	0	0	0	0	0	0	0	0	0	0	0	0	0	0	0	0	0	0	0	0	0	0	0	0	0	0	0	0	0	0	0	0	0	0	0	0	0	0	0	0	0	0	0	0
CASP1_15797	35	39	423	540	491	468	299	352	106	93	267	271	169	114	253	218	68	45	89	60	544	622	741	770	468	486	53	64	161	221	148	119	355	360	530	661	744	670	605	542	69	69	388	320	166	139	313	317	63
SEPHS2_15835	91	89	115	250	138	113	99	136	159	208	136	103	151	111	104	88	83	67	188	95	87	89	120	116	101	101	52	52	125	229	47	78	60	82	96	86	145	110	118	115	108	110	398	219	76	96	51	60	125
FCGR1A_15846	0	0	0	0	1	0	0	0	0	0	1	0	0	0	1	0	0	0	0	0	0	0	1	2	0	0	0	4	0	0	0	0	1	1	0	0	1	1	0	1	0	0	1	0	0	0	0	0	0
MMP9_15866	0	0	2	0	0	4	1	0	2	3	0	0	3	0	0	1	1	2	2	0	25	11	23	20	28	22	0	2	76	137	1	3	9	12	5	1	12	16	9	11	0	2	34	24	2	0	2	2	3
ABCC1_15868	209	211	241	281	230	240	141	160	263	261	195	257	232	226	175	162	224	253	286	294	375	335	385	425	314	370	215	247	413	482	239	262	257	246	286	257	288	277	285	274	282	263	395	362	234	218	138	183	272
SYT4_15874	6	10	23	23	23	8	10	10	27	39	23	30	14	19	15	8	15	13	11	17	0	2	1	0	0	0	32	15	1	0	7	9	1	2	0	0	1	1	2	1	30	22	2	0	7	7	0	0	6
HLA-DRB5_15922	21	14	62	82	75	57	72	83	33	27	212	229	23	20	31	8	12	11	38	25	18	14	13	18	7	13	18	12	22	16	17	21	10	15	25	37	31	30	52	42	28	24	95	85	33	17	8	15	36
EEF2K_15933	19	28	102	70	50	67	43	42	68	63	34	55	77	66	59	33	26	30	31	52	25	10	16	30	21	29	31	18	44	29	15	9	13	20	39	43	22	26	34	37	49	39	14	22	58	36	31	40	36
ARHGAP15_15992	0	0	0	0	0	0	0	0	0	0	0	0	0	0	0	0	0	0	0	0	0	0	0	0	0	0	0	0	0	0	0	0	0	0	0	0	0	0	0	0	0	0	0	0	0	0	0	0	0
CLDN2_15999	6	2	0	4	3	4	9	0	5	1	3	2	1	1	0	0	6	0	3	2	4	2	8	7	4	5	1	1	12	14	3	3	7	4	1	2	0	0	0	2	4	3	2	1	1	4	1	2	7
DLL1_16019	34	29	41	25	28	34	16	25	66	46	36	48	22	27	37	18	57	30	46	32	72	40	60	60	54	46	7	9	51	42	50	32	55	64	59	72	33	42	38	32	13	34	26	29	37	25	44	51	37
ADIRF_16033	0	0	2	1	0	0	0	0	0	0	0	0	1	1	4	0	0	1	2	0	0	1	0	0	1	0	0	0	0	0	1	0	0	0	2	0	0	0	0	0	0	0	5	0	2	2	0	0	0
LHX8_16034	0	0	0	0	0	2	0	3	1	0	2	0	0	0	0	1	0	0	0	0	0	0	0	0	0	0	0	3	0	0	0	0	1	0	0	0	0	0	0	0	3	1	0	0	1	0	0	0	1
CHST13_16045	0	1	0	1	0	0	0	0	0	1	0	0	0	0	0	0	0	0	0	0	0	2	0	0	0	0	0	0	0	0	0	0	0	0	0	0	0	1	0	0	0	0	0	0	0	2	0	0	0
RBFOX3_16067	0	0	0	1	0	0	0	0	0	0	0	0	0	0	0	0	0	0	0	0	0	0	0	0	0	0	0	0	0	0	0	0	0	0	0	0	0	0	0	0	0	0	0	0	0	0	0	0	0
EPHA4_16068	19	16	20	19	15	14	3	6	8	13	22	32	8	5	6	6	16	4	8	12	6	12	6	5	6	4	15	7	16	14	6	8	4	2	6	14	7	4	3	6	8	5	16	10	7	5	3	3	19
PODXL_16080	23	26	42	40	35	15	16	24	28	33	60	36	32	29	15	11	25	24	57	18	36	32	51	76	72	53	63	58	106	188	58	51	41	63	14	16	17	12	22	19	59	37	60	47	35	49	17	27	30
ST3GAL1_16088	11	9	12	10	8	15	13	4	22	32	16	10	13	16	7	8	5	10	19	16	15	5	8	12	8	8	11	7	13	9	4	8	7	5	8	8	3	6	8	6	20	21	17	9	16	13	4	0	19
EGR3_16091	0	0	0	0	0	0	0	0	0	1	0	0	0	0	0	0	1	0	0	0	0	0	0	0	1	0	17	13	1	0	1	0	0	0	0	1	1	0	0	0	10	6	2	0	1	1	0	0	0
ATP5MD_16099	2657	2585	4233	4071	4187	5214	1920	2000	3545	3660	1600	1716	1542	1790	2316	2229	2707	2506	1342	2107	4256	3746	5069	5290	2269	2251	3604	3102	2287	1859	1999	1923	2231	2370	5179	4776	4271	5078	2591	2457	3331	3024	2187	1977	2014	1954	2211	2378	2824
MDK_16100	806	675	1418	1375	1423	1271	1029	955	976	1262	1826	1820	1058	1090	852	819	796	794	1151	1062	1000	885	1187	1261	1156	1096	1179	882	1560	1870	845	869	814	891	694	831	965	902	1082	1113	1069	963	2755	2631	1033	924	618	744	980
C3AR1_16101	8	8	11	10	14	6	1	4	18	16	5	6	9	15	2	19	11	7	3	11	161	190	160	183	85	121	4	6	20	10	44	18	123	136	377	429	477	463	362	365	30	15	10	16	33	21	96	112	8
IRAK2_16105	9	5	7	17	9	8	2	8	9	11	9	10	15	4	6	11	17	11	21	5	84	60	81	90	67	55	75	100	44	93	116	161	90	109	48	52	104	55	75	40	113	119	101	54	89	123	42	55	10
CD3E_16113	0	0	0	0	0	0	0	0	0	0	0	0	0	0	0	0	0	0	0	0	0	0	0	0	0	0	0	0	0	0	0	0	0	0	0	0	0	0	0	0	0	1	0	0	0	0	0	0	0
ELOVL2_16117	0	1	1	0	1	5	1	2	1	1	0	1	0	2	0	1	2	2	0	1	1	5	0	2	2	1	7	2	3	0	3	4	2	1	3	5	4	2	2	0	3	0	1	1	3	2	2	0	0
AXL_16141	179	187	238	226	271	250	126	133	152	185	192	179	157	173	141	150	219	204	248	196	323	254	413	457	272	222	100	127	228	299	165	140	275	267	219	226	298	239	188	231	214	197	422	387	182	183	206	194	334
NDC80_16173	0	2	1	0	0	0	0	0	0	0	0	2	0	1	1	0	0	0	1	0	1	0	1	0	1	0	0	0	0	2	0	0	0	1	0	0	0	0	0	0	0	1	2	1	0	1	0	0	1
NR2F2_16181	8	4	9	11	13	4	8	4	7	9	8	7	6	0	5	2	4	5	18	15	9	3	10	15	8	10	14	6	14	12	8	10	8	8	5	6	1	4	9	11	7	6	8	9	6	0	1	7	12
SEC23A_16204	58	61	79	86	85	93	72	48	67	97	97	102	76	80	58	55	70	74	113	86	93	61	92	88	60	75	78	82	108	134	85	95	89	119	85	80	65	31	73	54	94	83	79	84	123	78	84	81	94
HOXB13_16208	0	0	0	0	0	1	0	0	0	0	0	0	0	1	0	0	0	0	0	0	0	0	0	0	0	0	1	0	0	0	0	0	0	1	0	0	0	0	0	1	0	0	0	0	0	0	0	0	0
NTRK3_16217	315	259	542	441	416	351	258	227	351	437	337	384	335	379	332	335	382	287	248	327	292	323	274	342	242	243	422	261	393	351	275	209	298	312	176	175	126	131	132	119	342	260	119	200	326	246	210	200	395
AIF1_16224	1	2	0	0	0	0	0	0	1	0	3	1	0	7	0	1	1	1	2	0	0	1	1	0	0	0	0	5	1	1	0	2	0	0	1	1	2	1	5	1	0	2	0	0	1	1	0	0	1
GIMAP4_16236	0	0	0	0	0	0	0	0	2	2	0	2	0	2	0	1	0	0	0	2	0	0	1	0	0	0	1	0	0	0	0	0	0	1	0	0	0	1	4	1	0	0	2	0	1	0	0	0	3
RNF121_16240	479	410	544	563	488	482	310	313	466	518	388	469	395	392	403	379	500	440	504	601	783	767	741	827	544	552	534	439	612	696	469	426	549	663	1229	1361	844	887	648	528	579	541	383	413	643	568	758	790	604
CFAP221_16242	1	1	5	7	7	6	1	0	5	8	6	3	2	4	2	3	3	2	2	6	0	0	1	1	0	0	10	10	0	1	0	4	2	0	2	0	0	1	0	3	8	5	0	3	3	6	0	0	2
GAS2_16298	16	7	16	9	18	24	8	14	11	24	13	18	9	20	16	13	23	13	26	13	12	5	9	4	7	4	23	36	9	18	9	18	6	9	5	3	7	2	3	6	27	14	12	10	17	9	2	2	28
CTPS1_16302	275	230	236	196	244	277	111	118	170	236	155	203	192	195	169	171	216	238	271	216	394	357	434	491	323	274	298	245	343	399	203	252	282	314	154	227	285	245	265	213	206	249	343	348	215	169	156	144	422
CBWD3_16310	0	1	0	0	1	0	0	3	2	1	2	3	4	2	0	1	1	1	2	6	3	1	0	0	2	2	3	2	2	2	2	3	4	2	0	2	2	2	1	0	0	5	2	1	0	3	1	0	4
SYN1_16318	1	0	1	3	0	0	2	0	0	1	4	2	0	0	1	0	1	0	4	2	1	0	0	1	0	0	4	1	2	3	0	0	1	3	2	6	9	6	6	3	1	1	2	0	1	0	1	0	1
SLC2A5_16347	0	1	9	10	5	10	13	12	2	0	6	1	3	0	1	4	0	0	2	0	1	0	1	2	4	1	1	1	0	0	0	0	0	0	0	2	11	10	27	34	0	0	3	3	0	0	0	0	2
TRIM16L_16350	349	353	398	539	335	342	246	222	405	457	481	417	445	291	278	296	417	366	672	418	554	595	672	777	508	509	301	354	663	832	573	550	529	551	190	211	239	217	246	241	489	472	1250	1020	381	377	196	229	515
SLC15A3_16357	1	0	3	9	5	6	4	4	0	1	7	3	0	1	1	1	0	0	0	0	20	10	16	19	22	14	0	0	7	2	0	1	8	9	10	14	14	14	13	20	0	0	3	10	3	0	8	8	0
WIPI1_16368	6	1	1	5	1	0	0	5	3	0	0	1	7	1	0	0	1	2	3	3	2	1	2	1	1	1	1	1	3	2	4	2	0	3	1	1	2	3	3	2	1	1	2	8	1	8	4	2	0
DDIAS_16376	7	8	6	10	11	5	2	1	3	3	3	2	5	4	11	3	8	8	9	5	15	20	21	25	19	10	12	5	13	15	4	10	15	11	3	10	10	5	15	6	10	3	12	10	3	3	3	5	17
RPL7L1_16386	48	53	78	78	67	67	41	29	60	79	84	69	49	76	47	35	35	63	90	84	59	41	59	61	39	50	82	54	81	108	47	66	67	63	35	38	30	38	39	31	61	54	81	72	57	49	23	46	75
IL20_16401	0	0	0	0	0	0	0	0	1	0	0	0	0	0	0	1	0	0	0	0	0	1	0	0	0	1	0	2	0	0	0	0	0	0	0	0	0	0	0	0	2	0	0	0	0	1	0	0	0
PSMD8_16404	356	313	430	454	494	484	251	212	377	405	374	390	316	311	299	244	296	370	348	387	386	350	369	412	248	252	473	363	391	446	279	321	327	343	290	372	354	259	252	261	425	359	445	395	376	308	253	308	410
MTF1_16424	7	4	15	12	14	14	7	3	9	10	13	20	12	13	9	8	10	6	9	7	10	5	7	14	5	12	2	7	9	11	4	5	17	10	11	24	12	8	10	15	6	8	10	9	18	15	16	9	9
AMPD3_16428	2	8	2	5	4	4	5	1	4	9	4	4	2	3	3	4	2	5	3	9	5	11	6	7	11	8	7	9	6	4	8	8	9	6	7	11	7	8	11	18	9	3	19	11	5	2	3	4	7
ZRANB2_16430	73	77	128	124	139	109	73	71	122	122	133	134	101	83	71	77	91	89	114	143	119	96	102	110	94	91	149	117	124	151	90	73	86	107	62	70	76	61	84	95	94	133	133	120	100	83	55	53	102
CER1_16431	1	0	5	5	0	2	0	1	2	9	1	4	1	4	5	4	1	3	2	11	2	2	0	3	2	0	3	3	0	0	3	2	1	1	0	0	0	0	1	0	8	1	0	2	0	2	0	0	4
[truncated: 2,042 more rows]
[truncated: 55 more columns]

## Sheet: Suppl. Table S3
upregulated genes:								downregulated genes:
	baseMean	log2FoldChange	lfcSE	stat	pvalue	padj			baseMean	log2FoldChange	lfcSE	stat	pvalue	padj
ANXA1	8264.27	9.2091	0.225693	36.3728	1.14743e-289	3.13364e-286		HMGA2	2546.05	-6.75314	0.268107	-21.4584	3.81071e-102	3.46902e-99
CD44	2814.18	9.51911	0.293638	29.0123	4.60307e-185	6.28549e-182		SLC38A1	1010.14	-4.85529	0.234295	-16.4549	7.74041e-61	1.92173e-58
TNC	3769.19	8.35052	0.3433	21.4114	1.0471e-101	7.1491e-99		CCND2	234.849	-4.27582	0.214814	-15.2495	1.65785e-52	2.6633e-50
ARID5B	635.583	5.06921	0.206294	19.7253	1.30761e-86	7.14215e-84		GREB1	167.077	-6.07025	0.413026	-12.2758	1.22104e-34	9.01258e-33
CCN2	1986.86	6.14786	0.262554	19.6069	1.35099e-85	6.14926e-83		CRABP2	221.265	-6.29874	0.447422	-11.8428	2.34457e-32	1.45523e-30
CSRP1	1306.44	5.47399	0.231583	19.3192	3.70551e-83	1.44568e-80		ATP1A2	310.71	-11.0451	0.878536	-11.4339	2.83118e-30	1.57795e-28
CAV1	1178.34	9.63497	0.487123	17.7264	2.6207e-70	8.94641e-68		KIT	302.842	-6.11875	0.458566	-11.1625	6.22031e-29	3.26686e-27
HTRA1	1293.87	6.21849	0.303123	17.2158	2.02289e-66	6.13836e-64		DSP	73.0769	-5.22614	0.385447	-10.9643	5.67678e-28	2.76844e-26
NQO1	728.851	4.58032	0.20898	17.1324	8.50693e-66	2.32324e-63		FZD10	123.117	-9.69277	0.838652	-10.3652	3.57106e-25	1.4342e-23
CCL2	1109.35	6.9804	0.363566	16.4493	8.48638e-61	1.93136e-58		DDC	62.0155	-10.1463	0.911059	-10.0392	1.02503e-23	3.83473e-22
TRIM22	271.585	7.08716	0.374777	16.2421	2.54091e-59	5.33786e-57		EPHB6	70.4453	-8.04897	0.724986	-9.7229	2.40825e-22	8.43197e-21
ADAM12	1721.23	6.62653	0.348553	16.1425	1.28158e-58	2.50001e-56		FGF8	49.4355	-9.88214	0.942198	-9.42705	4.21786e-21	1.40475e-19
TAGLN	2886.28	7.57381	0.412839	15.9234	4.35933e-57	7.93689e-55		INA	119.559	-3.82615	0.309461	-9.13251	6.69303e-20	2.10099e-18
IGFBP3	827.7	8.15126	0.463892	15.4158	1.28184e-53	2.18794e-51		SST	42.7221	-4.6711	0.409463	-8.96564	3.08482e-19	9.05876e-18
FSTL1	2193.38	3.05872	0.139199	14.7898	1.70545e-49	2.58755e-47		PHOX2A	25.988	-8.95009	0.913111	-8.7066	3.13118e-18	8.81573e-17
SPP1	820.938	6.79865	0.39391	14.7208	4.74356e-49	6.81824e-47		IKZF1	35.0545	-9.31647	0.95929	-8.66941	4.34383e-18	1.19828e-16
GFAP	860.488	10.1582	0.636631	14.3854	6.3926e-47	8.72909e-45		CDH7	57.1478	-9.19623	0.98669	-8.30679	9.83248e-17	2.50958e-15
MYL9	1363.61	6.51044	0.385405	14.2978	2.25834e-46	2.93692e-44		H2BC6	83.1996	-4.2967	0.399659	-8.24879	1.60008e-16	4.04612e-15
PSMB8	148.557	5.36968	0.306086	14.276	3.08829e-46	3.8337e-44		COL2A1	78.6634	-8.18868	0.888463	-8.09114	5.91077e-16	1.46748e-14
EMP1	573.811	6.61151	0.39393	14.2449	4.81946e-46	5.72258e-44		DUSP6	62.9852	-4.3286	0.416203	-7.99754	1.26932e-15	3.0677e-14
ITGAV	2500.55	3.57231	0.182129	14.1236	2.71784e-45	3.09267e-43		H2BC14	385.643	-4.04222	0.381278	-7.97901	1.47517e-15	3.53395e-14
SCARA3	296.842	3.65677	0.1975	13.452	2.99703e-41	3.27395e-39		DMRTA1	137.953	-3.52825	0.318807	-7.93034	2.18541e-15	5.18987e-14
A2M	516.71	7.34952	0.473686	13.4045	5.69127e-41	5.97802e-39		FGF18	42.3575	-8.63435	0.987225	-7.73314	1.04925e-14	2.34876e-13
PSMB9	173.822	6.0403	0.379891	13.2678	3.56022e-40	3.6011e-38		H2BC3	1003.31	-3.32905	0.311684	-7.47246	7.87092e-14	1.66632e-12
MBNL2	1006.22	3.54735	0.194634	13.0879	3.86376e-39	3.76854e-37		FLRT3	819.755	-3.45034	0.32831	-7.46349	8.42634e-14	1.77018e-12
RAB31	400.728	3.11986	0.163466	12.9682	1.85413e-38	1.74608e-36		ARSG	104.704	-3.25844	0.307005	-7.35637	1.8898e-13	3.93973e-12
NRCAM	1880.69	3.53577	0.195896	12.9445	2.52343e-38	2.29716e-36		TBC1D10C	28.9621	-7.60467	0.907324	-7.27928	3.35599e-13	6.78905e-12
GSN	362.765	3.77085	0.214652	12.9085	4.02859e-38	3.54906e-36		DBH	19.093	-7.54254	0.914308	-7.15573	8.32286e-13	1.61204e-11
AMIGO2	356.442	4.6268	0.284345	12.7549	2.9272e-37	2.49818e-35		GLI1	19.5204	-4.7387	0.526394	-7.10248	1.22536e-12	2.35666e-11
GAP43	1782.93	4.37536	0.265153	12.7298	4.03615e-37	3.34022e-35		PPM1E	74.0107	-2.54475	0.219071	-7.05137	1.77162e-12	3.35993e-11
HMOX1	155.558	5.27787	0.341949	12.5103	6.5607e-36	5.26979e-34		LMO3	47.3144	-2.73557	0.246253	-7.04791	1.81621e-12	3.42074e-11
ACTA2	1626.4	4.43	0.278026	12.337	5.72698e-35	4.46868e-33		DCC	28.3823	-7.72658	0.956017	-7.03605	1.97772e-12	3.68538e-11
CAV2	333.69	8.94687	0.644906	12.3225	6.85192e-35	5.19794e-33		CD55	19.4254	-4.02737	0.436453	-6.93629	4.02532e-12	7.13842e-11
CYBRD1	302.077	4.0317	0.248977	12.1766	4.14167e-34	2.97655e-32		MAL2	85.8858	-4.5307	0.511361	-6.90452	5.03748e-12	8.87571e-11
SOX9	449.467	3.93267	0.241702	12.1334	7.02871e-34	4.9219e-32		LEF1	266.489	-2.67771	0.243077	-6.90196	5.1289e-12	8.92167e-11
CD34	282.858	8.00385	0.580574	12.0637	1.64326e-33	1.12193e-31		DCX	182.26	-4.4593	0.513771	-6.73316	1.66022e-11	2.68287e-10
PHLDA1	1073.6	3.91482	0.243252	11.9827	4.37581e-33	2.91472e-31		FGF17	9.70921	-7.54272	0.974362	-6.71488	1.88226e-11	3.00612e-10
TGFB2	232.854	5.9524	0.41496	11.9346	7.8105e-33	5.07868e-31		HES5	118.083	-5.12721	0.617012	-6.68903	2.24653e-11	3.56702e-10
PALMD	285.665	7.43434	0.543098	11.8475	2.2176e-32	1.40844e-30		PLA2G7	20.5818	-5.30928	0.647174	-6.6586	2.76449e-11	4.33897e-10
SERPINE1	638.907	10.7856	0.851131	11.4972	1.36276e-30	8.27044e-29		DUSP4	327.365	-2.69847	0.256934	-6.61053	3.82949e-11	5.94224e-10
FBXO32	260.134	7.28958	0.547796	11.4816	1.63236e-30	9.69122e-29		GAD1	41.9674	-3.90058	0.439743	-6.59608	4.22185e-11	6.47745e-10
PLAAT4	226.472	6.37972	0.46932	11.4628	2.02808e-30	1.17844e-28		CTTNBP2	23.032	-4.51507	0.541115	-6.49598	8.24965e-11	1.22445e-09
TNFRSF12A	154.383	6.56242	0.485777	11.4506	2.3363e-30	1.32926e-28		MDK	2278.64	-2.19078	0.18656	-6.38286	1.73816e-10	2.53845e-09
PDLIM1	260.527	4.29543	0.289148	11.3971	4.325e-30	2.36232e-28		CDC7	95.5935	-2.60541	0.25311	-6.34275	2.25704e-10	3.27871e-09
SHB	258.083	3.68686	0.237708	11.3032	1.26526e-29	6.77535e-28		PGF	37.1548	-5.19792	0.664222	-6.32005	2.61473e-10	3.75833e-09
COL1A1	494.74	6.98106	0.539853	11.0791	1.58529e-28	8.16874e-27		UGT2B7	14.5466	-4.32245	0.531781	-6.24778	4.16324e-10	5.80092e-09
NT5E	382.002	9.61254	0.778407	11.0643	1.86867e-28	9.45061e-27		SDK2	339.465	-3.61256	0.422639	-6.18154	6.34778e-10	8.71145e-09
PLAU	143.896	6.72537	0.517982	11.0532	2.11494e-28	1.05017e-26		TFAP2A	53.2419	-4.1988	0.525555	-6.08652	1.15394e-09	1.55242e-08
BCL3	99.7358	5.04692	0.371347	10.8979	1.1789e-27	5.6484e-26		SLC27A2	7.89013	-7.15123	1.01917	-6.0355	1.58469e-09	2.10087e-08
COL5A1	253.136	4.1591	0.291056	10.8539	1.91043e-27	8.99547e-26		SULT1C2	9.35977	-6.89147	0.979155	-6.01689	1.77799e-09	2.34575e-08
OLFML2A	416.017	7.02401	0.559098	10.7745	4.5417e-27	2.10227e-25		ELAVL4	13.9511	-6.11806	0.877594	-5.83192	5.47917e-09	7.0583e-08
TAPBP	401.471	2.72506	0.160542	10.7452	6.24192e-27	2.84111e-25		FAM72A	818.985	-2.74197	0.298761	-5.83063	5.52186e-09	7.0799e-08
PPP1CB	4736.27	2.70188	0.159395	10.6771	1.30283e-26	5.83282e-25		ONECUT1	9.06924	-6.47063	0.945811	-5.78407	7.29158e-09	9.30529e-08
ACTN1	8761.89	3.15523	0.204202	10.5544	4.84835e-26	2.13562e-24		PHGDH	120.754	-3.3004	0.405349	-5.67511	1.38602e-08	1.72841e-07
ETS1	210.133	4.93198	0.374102	10.5105	7.73151e-26	3.35155e-24		SALL3	9.56877	-6.48572	0.974865	-5.62716	1.83204e-08	2.26394e-07
IQGAP1	738.055	2.72135	0.165121	10.4248	1.91073e-25	8.02801e-24		MND1	190.153	-2.81683	0.324346	-5.60152	2.12478e-08	2.60214e-07
OLFML2B	325.455	3.71062	0.260012	10.425	1.90702e-25	8.02801e-24		ASNS	2355.7	-3.75609	0.495181	-5.56581	2.60933e-08	3.15313e-07
CDH6	1424.07	2.52189	0.146096	10.4171	2.0727e-25	8.57658e-24		ISL1	8.52477	-6.7648	1.03706	-5.55878	2.71662e-08	3.26832e-07
ANXA2	1616.44	4.25113	0.313436	10.3726	3.30562e-25	1.34741e-23		H1-0	17.4934	-5.21052	0.758713	-5.54956	2.86387e-08	3.41862e-07
COL3A1	215.004	6.0793	0.495334	10.2543	1.13207e-24	4.48069e-23		PAX8	14.3392	-6.99649	1.13662	-5.27572	1.32238e-07	1.5174e-06
CRIM1	2776.3	4.72369	0.363346	10.2483	1.20398e-24	4.69723e-23		P2RX3	12.5328	-5.97679	0.952001	-5.22771	1.7162e-07	1.95289e-06
SEMA3A	566.754	2.65742	0.163352	10.1463	3.4406e-24	1.32342e-22		STMN2	8.45315	-6.0199	0.971361	-5.1679	2.36733e-07	2.68264e-06
LRP10	541.244	2.86777	0.184238	10.1378	3.75475e-24	1.4242e-22		ABCB1	31.2891	-5.32306	0.836655	-5.16708	2.37781e-07	2.68339e-06
IFITM3	1157.09	3.91083	0.291619	9.98163	1.83426e-23	6.76939e-22		SOX1	16.6835	-3.29679	0.448391	-5.12229	3.01843e-07	3.35095e-06
LOXL1	959.206	4.16669	0.317509	9.97355	1.98977e-23	7.24542e-22		WDR72	5.66545	-6.15572	1.0308	-5.00169	5.68298e-07	6.039e-06
EDN1	161.747	7.78678	0.686142	9.89122	4.54468e-23	1.6331e-21		MAP7	271.152	-3.18642	0.449204	-4.86733	1.13117e-06	1.16574e-05
KLF5	67.7513	5.74973	0.482379	9.84648	7.09871e-23	2.51774e-21		STC2	8.76786	-4.57158	0.739348	-4.83072	1.36042e-06	1.37603e-05
AXL	130.29	3.53318	0.267642	9.46481	2.94093e-21	1.01667e-19		H2BC8	96.8661	-2.41341	0.294369	-4.80147	1.57504e-06	1.57562e-05
IFITM1	245.417	4.02028	0.319473	9.45395	3.26292e-21	1.11388e-19		NCAN	58.2882	-3.43932	0.51243	-4.7603	1.93304e-06	1.90583e-05
SAMD9L	73.2568	6.57802	0.590895	9.43996	3.72923e-21	1.25735e-19		KCNQ2	16.4868	-3.60278	0.553236	-4.70466	2.54293e-06	2.48915e-05
VCAM1	185.164	5.00322	0.429035	9.33075	1.05127e-20	3.45905e-19		INHBE	7.62451	-6.65899	1.20645	-4.69063	2.72368e-06	2.64711e-05
FTL	289.449	2.87084	0.200601	9.32621	1.09723e-20	3.56731e-19		FKBP5	152.843	-2.10373	0.235623	-4.68429	2.80939e-06	2.71111e-05
CCDC80	169.928	3.66783	0.288029	9.26237	1.99948e-20	6.4242e-19		GABRB3	27.028	-3.28896	0.49068	-4.66488	3.08796e-06	2.95902e-05
ITGA11	104.873	6.55612	0.604048	9.19815	3.64159e-20	1.15641e-18		PHLDB2	200.233	-1.83913	0.180888	-4.63895	3.50178e-06	3.34383e-05
IER3	205.72	3.89368	0.317196	9.1227	7.32729e-20	2.27396e-18		RPRM	19.2352	-3.22243	0.480402	-4.62618	3.72463e-06	3.54424e-05
GBP1	338.535	5.04368	0.444823	9.09054	9.85507e-20	3.02407e-18		EOMES	15.5402	-6.74879	1.24318	-4.62427	3.75928e-06	3.55246e-05
LMNA	2222.52	3.03086	0.223518	9.08588	1.02859e-19	3.12119e-18		DEPDC1B	849.88	-2.21527	0.265503	-4.57724	4.71146e-06	4.40651e-05
IL13RA2	135.754	5.86412	0.538312	9.03588	1.62686e-19	4.88236e-18		PLAGL1	56.6712	-3.83966	0.623169	-4.5568	5.19385e-06	4.80827e-05
TIMP3	163.765	3.21504	0.245705	9.015	1.96865e-19	5.8439e-18		TRIB1	50.6245	-2.24266	0.273837	-4.53795	5.6804e-06	5.22329e-05
IRF1	184.536	2.91276	0.214701	8.90896	5.15154e-19	1.49669e-17		MTNR1A	8.82122	-4.64001	0.807242	-4.5092	6.50734e-06	5.92385e-05
H2AC6	222.641	3.33403	0.264214	8.83384	1.01145e-18	2.90766e-17		OLIG2	10.1394	-5.5819	1.0252	-4.46926	7.84895e-06	7.05114e-05
PRSS23	180.66	4.51386	0.397846	8.8322	1.02636e-18	2.91979e-17		MTHFD2	4080.07	-2.72747	0.391214	-4.41567	1.00696e-05	8.9286e-05
ANXA2P2	5160.67	3.81303	0.323305	8.70086	3.29377e-18	9.17886e-17		CCNG1	2145.43	-1.81645	0.185017	-4.41285	1.02017e-05	9.01647e-05
TPM1	114.733	3.88578	0.335196	8.60923	7.3552e-18	2.00871e-16		OLIG1	43.3141	-6.76964	1.30801	-4.411	1.02892e-05	9.03531e-05
LINC01279	152.269	4.03761	0.353612	8.59025	8.67775e-18	2.34643e-16		ZFAND1	130.963	-1.87066	0.197944	-4.39853	1.08987e-05	9.53985e-05
HLA-DRA	148.254	8.37664	0.866268	8.51542	1.65981e-17	4.44405e-16		CD24	120.495	-2.50997	0.347696	-4.34278	1.40689e-05	0.000121206
RUNX1	189.885	9.90256	1.0535	8.45044	2.90201e-17	7.69455e-16		MTF2	301.615	-1.72435	0.167648	-4.32064	1.55576e-05	0.000133191
KLF6	119.388	2.92017	0.228413	8.4066	4.22076e-17	1.10836e-15		TRGC2	6.5528	-6.43399	1.26921	-4.28141	1.85713e-05	0.00015751
PSAP	307.4	2.77305	0.211457	8.38496	5.07443e-17	1.31984e-15		PLS1	141.51	-2.21902	0.285327	-4.27236	1.93414e-05	0.000163029
ABHD4	187.972	3.00727	0.24075	8.33758	7.58255e-17	1.95358e-15		CHAC1	41.0433	-3.11475	0.509212	-4.15297	3.28183e-05	0.00026996
FAS	189.206	3.17739	0.267752	8.13212	4.21856e-16	1.05696e-14		SLC25A13	220.446	-1.69837	0.169276	-4.12564	3.69709e-05	0.000299607
COL12A1	110.743	4.86422	0.478266	8.07965	6.49549e-16	1.59812e-14		COL15A1	5.7858	-5.56906	1.11422	-4.10067	4.11951e-05	0.000330893
CDH11	597.265	4.07718	0.382644	8.04189	8.84632e-16	2.15708e-14		HOXD4	27.0692	-3.47884	0.605135	-4.09634	4.19737e-05	0.000336159
PPARG	53.5827	4.13488	0.396356	7.90927	2.58899e-15	6.09528e-14		CDT1	328.353	-2.47674	0.363834	-4.05881	4.93225e-05	0.000392711
CNN1	265.556	3.51081	0.318709	7.87808	3.32456e-15	7.76014e-14		BMF	35.1145	-2.54774	0.383951	-4.03107	5.55229e-05	0.000439516
MVP	47.9469	3.45223	0.313987	7.80997	5.71996e-15	1.32383e-13		H3C2	2307.96	-2.37641	0.346532	-3.97196	7.12824e-05	0.000554622
PARP14	235.502	3.39931	0.308016	7.78954	6.7253e-15	1.54343e-13		CENPH	965.649	-2.48064	0.37573	-3.94071	8.12401e-05	0.000628518
IFI6	610.072	3.35456	0.30262	7.78058	7.21941e-15	1.64302e-13		DMTN	14.9662	-3.02978	0.516194	-3.9322	8.41726e-05	0.000649366
ME1	2179.55	2.76915	0.227801	7.7662	8.0878e-15	1.82544e-13		SLC2A1	209.757	-2.83933	0.472452	-3.89316	9.89481e-05	0.000754824
ACTG2	118.417	9.2394	1.07796	7.64354	2.11322e-14	4.69205e-13		EGR1	174.972	-2.09675	0.28383	-3.86411	0.000111497	0.00084583
THBS1	59.0525	8.97189	1.04483	7.62984	2.35036e-14	5.17649e-13		TXNIP	250.752	-2.74741	0.455713	-3.83444	0.000125849	0.000949427
ARL4C	1203.95	2.36998	0.179994	7.61122	2.71519e-14	5.93214e-13		CYP39A1	13.7721	-2.79772	0.477449	-3.76526	0.000166374	0.00123849
GLRX	389.493	2.67617	0.223472	7.5006	6.35248e-14	1.37687e-12		SDC1	75.5088	-2.24055	0.32948	-3.76517	0.000166432	0.00123849
S100B	303.023	4.69092	0.492752	7.49042	6.86546e-14	1.47634e-12		MCM2	10.5405	-3.02592	0.543432	-3.72801	0.000193	0.00142841
PDPN	3439.55	2.47542	0.197188	7.48232	7.30218e-14	1.55799e-12		VAV3	15.3441	-3.42171	0.653916	-3.70339	0.000212735	0.00156598
ITGA4	257.806	4.28467	0.446839	7.3509	1.96871e-13	4.07314e-12		HSPA1A	18.9465	-3.1281	0.577782	-3.68323	0.000230299	0.00168168
GADD45B	49.0678	3.2583	0.307297	7.34892	1.99815e-13	4.10298e-12		FANCI	127.62	-2.30749	0.355334	-3.67962	0.000233586	0.00170113
AHR	45.3483	5.40915	0.60474	7.29099	3.07693e-13	6.27098e-12		NR2F6	13.338	-3.0439	0.558585	-3.65906	0.000253141	0.00183376
AFP	47.6647	8.66127	1.05415	7.26773	3.65578e-13	7.34113e-12		TRPC6	15.8911	-8.25089	1.98242	-3.6576	0.00025459	0.00183938
RBP1	3917.1	2.25997	0.174939	7.20235	5.91824e-13	1.17976e-11		FOS	27.0912	-2.854	0.517732	-3.58101	0.000342269	0.00243421
AIFM2	69.4281	3.30482	0.320292	7.19601	6.2001e-13	1.22699e-11		H2BC5	4816.09	-2.16297	0.326957	-3.55697	0.000375161	0.00266121
HLA-B	31.0048	4.80514	0.530168	7.17724	7.11322e-13	1.39757e-11		TMEM97	1728.38	-1.80438	0.226731	-3.54775	0.000388541	0.00274188
NEAT1	758.913	3.78799	0.38902	7.16672	7.68156e-13	1.49845e-11		CTH	63.2656	-2.21794	0.344018	-3.54035	0.000399594	0.00280538
TIMP2	32.2354	4.484	0.493555	7.059	1.6771e-12	3.20291e-11		ETV1	17.9287	-2.87608	0.531198	-3.53178	0.000412768	0.00289044
HSPB8	68.9361	5.74338	0.674194	7.03562	1.98371e-12	3.68538e-11		RFC4	99.2233	-2.13869	0.323493	-3.51998	0.000431572	0.00301438
FOSL1	92.7019	4.31374	0.471201	7.03254	2.02801e-12	3.74224e-11		AMER1	95.8841	-2.13775	0.323306	-3.51913	0.000432971	0.00301644
TIMP1	235.057	2.91619	0.27302	7.0185	2.24266e-12	4.11054e-11		BZW2	80.7816	-1.82248	0.235315	-3.49524	0.000473637	0.00329135
PAX6	34.0361	4.29217	0.470115	7.00291	2.50691e-12	4.56425e-11		LIX1	167.742	-3.53463	0.731658	-3.46423	0.000531751	0.00367649
IFIT1	749.593	3.30737	0.331048	6.9699	3.17157e-12	5.73613e-11		MYO10	313.037	-1.70812	0.205191	-3.45104	0.000558438	0.00384155
EFNA1	73.5317	4.23469	0.465065	6.95535	3.51678e-12	6.31864e-11		ZNF589	125.924	-1.69233	0.201081	-3.44305	0.000575194	0.00393698
FOXA1	41.9257	3.30096	0.331524	6.94058	3.90498e-12	6.97026e-11		HHIP	32.7726	-2.93773	0.566251	-3.42204	0.000621529	0.0041911
ABCC3	30.4139	8.4217	1.07523	6.90245	5.11115e-12	8.92167e-11		GHR	5.37296	-4.15158	0.92942	-3.39091	0.000696608	0.00466284
CASP1	42.7147	7.47067	0.940647	6.87896	6.02904e-12	1.04211e-10		IGFBP4	20.9619	-3.08435	0.616076	-3.38326	0.000716302	0.00478294
BBOX1	56.7048	9.13783	1.18432	6.8713	6.36195e-12	1.09274e-10		FAM72C	94.5977	-2.34998	0.400201	-3.37327	0.000742818	0.00493585
EPHA3	56.8305	8.24959	1.05523	6.87015	6.41347e-12	1.0947e-10		SFRP2	248.235	-3.82942	0.839523	-3.37027	0.000750951	0.00497779
CNN3	13506.6	2.42696	0.208046	6.85884	6.94216e-12	1.17758e-10		KIF15	514.746	-1.97537	0.291143	-3.35015	0.000807682	0.00532797
THY1	120.323	3.96383	0.432963	6.84547	7.62278e-12	1.28505e-10		SP8	5.33603	-4.09162	0.925691	-3.33979	0.000838404	0.00551731
PPIC	199.91	2.92707	0.281727	6.84021	7.90772e-12	1.32491e-10		NRG2	9.53289	-3.01601	0.611058	-3.29921	0.000969571	0.00631956
B2M	542.698	2.64242	0.24031	6.83461	8.22297e-12	1.36932e-10		SYTL1	5.28604	-3.7676	0.846952	-3.26772	0.00108419	0.0070164
PDGFB	53.7514	6.73009	0.839114	6.82874	8.56629e-12	1.41785e-10		DTL	278.98	-1.7073	0.21676	-3.26305	0.00110221	0.00711615
ACOX1	116.888	2.30023	0.190483	6.82595	8.73451e-12	1.43698e-10		GUCY1A1	8.23704	-3.0979	0.648024	-3.23737	0.00120635	0.00775188
CSRNP1	97.6869	3.06099	0.303675	6.78681	1.14638e-11	1.8747e-10		SLITRK1	6.00141	-4.40964	1.05434	-3.2339	0.00122112	0.00781278
GCLM	558.643	1.89542	0.132351	6.7655	1.32849e-11	2.15958e-10		ERBB3	3.72101	-4.38094	1.06165	-3.1846	0.00144952	0.00924915
SCN2A	30.8187	5.99439	0.742648	6.72511	1.75459e-11	2.81871e-10		VRK1	972.39	-1.59828	0.188851	-3.16799	0.00153499	0.00974899
SRPX	265.714	2.65179	0.247441	6.6755	2.46388e-11	3.88951e-10		APBB2	53.2348	-1.85203	0.272264	-3.12943	0.00175146	0.0109708
TGFB3	46.7704	3.82507	0.426297	6.627	3.42578e-11	5.34618e-10		FOSB	4.88182	-4.45944	1.11385	-3.10584	0.0018974	0.0118576
PPARGC1A	110.109	2.48635	0.225269	6.59812	4.16407e-11	6.4249e-10		H3C4	4614.36	-2.07687	0.348062	-3.0939	0.00197544	0.0122891
EGLN3	38.3279	3.25597	0.342392	6.58886	4.43216e-11	6.76215e-10		EGFL6	2.81075	-4.84341	1.24594	-3.08474	0.00203732	0.0126453
ID1	1020.58	4.13555	0.477996	6.55978	5.38886e-11	8.1761e-10		ATAD5	66.6866	-2.04455	0.341301	-3.06049	0.00220972	0.0136224
NR2F1	785.572	3.35201	0.360042	6.53259	6.46441e-11	9.75376e-10		EXOSC8	372.372	-1.86681	0.287037	-3.01984	0.00252904	0.0154861
ANXA5	1053.75	2.03878	0.159099	6.52912	6.61552e-11	9.92691e-10		HES3	2.06103	-4.75066	1.25122	-2.9976	0.00272115	0.0165881
DTX3L	27.2189	4.93021	0.603057	6.51715	7.16545e-11	1.06934e-09		PAIP1	15.6281	-2.92049	0.646234	-2.97182	0.00296043	0.017887
MFAP5	51.5038	8.4355	1.14486	6.49468	8.32116e-11	1.22838e-09		CHRNA4	2.46998	-5.00643	1.3579	-2.95045	0.00317307	0.0190454
EPHX1	415.551	2.2168	0.188553	6.45333	1.09421e-10	1.6066e-09		H2BC15	38.8252	-2.0232	0.347632	-2.94333	0.00324702	0.0193616
FNDC4	27.7887	6.32245	0.839366	6.34104	2.28215e-10	3.29764e-09		BMP5	9.11362	-3.0519	0.704003	-2.91462	0.00356127	0.0210515
HLA-DRB4	40.5497	6.50412	0.872132	6.31111	2.77034e-10	3.96116e-09		SKA1	142.689	-1.72639	0.250129	-2.90404	0.00368378	0.0216819
ATP6V0E1	3845.3	2.24957	0.198262	6.30264	2.92616e-10	4.16216e-09		PIK3C2B	15.0801	-2.79764	0.622488	-2.88783	0.00387914	0.0227827
CD58	488.865	2.24922	0.198635	6.28903	3.19461e-10	4.52046e-09		H2BC4	2072.11	-1.9495	0.329076	-2.88536	0.00390965	0.0229126
CLU	46.793	5.11273	0.655838	6.27095	3.58841e-10	5.05152e-09		RAD51AP1	130.338	-1.82638	0.286915	-2.88023	0.00397381	0.0232387
ITGB3	33.1583	7.55681	1.04782	6.25755	3.91068e-10	5.47696e-09		H2AC8	390.473	-2.36094	0.473752	-2.87269	0.00406995	0.0237501
SLIT2	681.642	3.16717	0.34828	6.22251	4.89263e-10	6.78263e-09		RFC3	366.244	-1.70609	0.248764	-2.83838	0.00453426	0.0264031
CHN1	651.427	2.18197	0.191031	6.18732	6.11953e-10	8.44062e-09		CDH3	3.85796	-4.98982	1.4133	-2.82305	0.00475689	0.0276356
ITGB1	875.686	2.45542	0.235742	6.1738	6.66666e-10	9.05803e-09		CDCA5	96.2048	-1.72329	0.257089	-2.81339	0.00490221	0.0283043
SRXN1	40.8938	3.07348	0.335823	6.17432	6.64483e-10	9.05803e-09		TOP2A	222.411	-1.96734	0.34484	-2.80518	0.00502885	0.0289132
NCEH1	92.3299	2.53824	0.250307	6.14542	7.9752e-10	1.07823e-08		CER1	7.99219	-3.67784	0.964036	-2.77773	0.00547393	0.0313402
LY96	30.5591	7.36109	1.04949	6.06112	1.35175e-09	1.80962e-08		CD8A	3.30885	-3.89148	1.0517	-2.74934	0.00597145	0.034046
CARMIL1	97.1174	3.90061	0.480139	6.04118	1.52993e-09	2.03817e-08		SMARCC1	172.371	-1.79948	0.290869	-2.74858	0.00598546	0.0340547
PLP2	25.7954	6.22955	0.869347	6.01549	1.79344e-09	2.35476e-08		H1-2	3406.08	-1.80277	0.292701	-2.74263	0.00609489	0.0345335
ASPN	24.5852	7.39029	1.07759	5.93015	3.02665e-09	3.95491e-08		CIT	183.461	-1.80162	0.293508	-2.73117	0.00631099	0.0355367
MYC	600.985	2.01425	0.172591	5.8766	4.18773e-09	5.44604e-08		STAR	11.0125	-2.79427	0.658598	-2.72438	0.00644231	0.0360682
TPPP3	202.103	3.22318	0.379817	5.8533	4.81923e-09	6.23759e-08		VEGFA	162.338	-1.72796	0.267216	-2.72424	0.00644499	0.0360682
TRAK2	87.7847	2.38414	0.240535	5.75441	8.69464e-09	1.10442e-07		PRKX	20.0886	-2.03881	0.382063	-2.71894	0.00654913	0.0365014
HLA-DRB1	30.6856	7.70582	1.17003	5.73133	9.96476e-09	1.2599e-07		IRF8	1.66619	-5.03439	1.49491	-2.69876	0.00695992	0.0383754
NLRC5	19.2772	5.40197	0.768877	5.7252	1.03315e-08	1.30024e-07		LIG1	55.364	-1.8383	0.310679	-2.69829	0.00696967	0.0383754
PLXDC2	1334.64	2.92478	0.336964	5.71212	1.11576e-08	1.39777e-07		SLC13A5	5.30463	-3.81226	1.05201	-2.67323	0.00751252	0.0411156
SOCS3	34.5389	4.49449	0.616531	5.66799	1.44484e-08	1.79358e-07		RPS3	467.385	-1.59373	0.224616	-2.64329	0.00821056	0.044402
AHRR	20.6109	4.77284	0.673456	5.6022	2.11643e-08	2.60214e-07		HSP90AB1	2779.72	-1.5051	0.191456	-2.63822	0.00833421	0.044893
NR3C1	119.713	3.1671	0.388213	5.58224	2.37435e-08	2.8948e-07		TRGC1	3.65901	-4.23821	1.22845	-2.63601	0.00838879	0.045098
CTSB	1153.83	2.30865	0.234876	5.57165	2.52344e-08	3.0629e-07		CEBPA	7.60064	-2.78145	0.677332	-2.6301	0.00853593	0.0457989
TGFB1	15.8498	7.20708	1.11851	5.5494	2.86658e-08	3.41862e-07		PPP1CC	2144.5	-1.65128	0.248134	-2.62473	0.00867175	0.0464364
PRUNE2	27.1643	4.29742	0.603558	5.4633	4.6736e-08	5.54939e-07		MYB	6.81627	-2.43743	0.552028	-2.6039	0.00921691	0.049067
CXCL14	22.6375	6.39579	0.992261	5.43787	5.39209e-08	6.3748e-07
TNFSF12	18.4373	5.55806	0.839558	5.42912	5.66322e-08	6.66649e-07
TRAM2	341.097	2.6667	0.307178	5.42583	5.76861e-08	6.7614e-07
MSRA	11.5982	6.94341	1.09779	5.41397	6.16409e-08	7.19407e-07
NRG1	40.2924	2.76641	0.32641	5.41165	6.24481e-08	7.25727e-07
SLFN12	40.399	5.50796	0.839794	5.36793	7.96435e-08	9.21637e-07
FLNA	1742.38	2.23703	0.233794	5.29113	1.21564e-07	1.40081e-06
SULF1	135.364	4.23368	0.613108	5.27425	1.33304e-07	1.52323e-06
CCN1	30.9098	3.25882	0.437871	5.15864	2.48754e-07	2.79566e-06
HLA-DRB5	11.0809	6.96857	1.16188	5.13699	2.79181e-07	3.12477e-06
VIM	10057	1.85919	0.167549	5.12801	2.92824e-07	3.26409e-06
SYTL2	17.8185	5.01223	0.784357	5.11532	3.13217e-07	3.46314e-06
PINK1	278.228	2.28803	0.252995	5.09114	3.55926e-07	3.9195e-06
AP2M1	46.3872	2.58181	0.311412	5.07948	3.78478e-07	4.15109e-06
FEZ2	1344.22	1.70587	0.139281	5.06799	4.02044e-07	4.39193e-06
HLA-C	16.1443	4.58653	0.707909	5.06637	4.05475e-07	4.41177e-06
HSPB1	1013.95	2.70307	0.33657	5.06008	4.19079e-07	4.54168e-06
JADE2	30.3751	3.76468	0.546568	5.05826	4.23099e-07	4.56713e-06
EEA1	296.262	1.84591	0.167507	5.04998	4.41866e-07	4.75093e-06
MAP1LC3A	155.425	2.14541	0.227241	5.04052	4.6427e-07	4.97224e-06
ZNF469	15.54	5.88802	0.977202	5.00206	5.67209e-07	6.039e-06
AQP1	16.6911	6.11608	1.0246	4.99324	5.93744e-07	6.28494e-06
TWIST1	30.3149	4.18092	0.637148	4.99243	5.96234e-07	6.28693e-06
ACHE	45.3512	2.77384	0.359066	4.94015	7.80623e-07	8.19954e-06
STK10	159.839	2.04626	0.212174	4.93114	8.17509e-07	8.55409e-06
BCL2L1	1330.37	2.03818	0.211491	4.90886	9.16051e-07	9.54861e-06
IFI44	152.109	3.7685	0.566143	4.8901	1.00784e-06	1.04654e-05
SEMA5A	132.274	2.43736	0.294508	4.88055	1.05792e-06	1.09439e-05
MICALL1	61.8451	2.57122	0.323768	4.85291	1.21663e-06	1.2491e-05
TGFBR2	366.265	2.44424	0.298085	4.84507	1.26568e-06	1.29459e-05
GJA1	366.335	1.9889	0.20433	4.83972	1.30022e-06	1.32497e-05
GRIK4	16.8619	4.965	0.819512	4.83824	1.30991e-06	1.32988e-05
TUBB2A	1281.05	1.90258	0.187012	4.82635	1.39061e-06	1.40138e-05
SQSTM1	65.5909	3.25069	0.468687	4.80211	1.57001e-06	1.57562e-05
IL7R	48.7506	5.79691	1.00143	4.79008	1.66718e-06	1.66171e-05
SLC10A4	14.0592	5.22569	0.886446	4.767	1.86985e-06	1.85693e-05
CBR3	19.9658	4.17749	0.667318	4.76158	1.92088e-06	1.90069e-05
PLAT	32.3982	3.18414	0.464247	4.7047	2.54242e-06	2.48915e-05
MAP1LC3B	775.72	1.75494	0.16074	4.69668	2.64423e-06	2.57907e-05
LUM	139.692	3.0728	0.442066	4.68889	2.74686e-06	2.66017e-05
C1R	18.2031	4.36715	0.721049	4.66979	3.01515e-06	2.89943e-05
NOL3	28.4469	2.97635	0.427383	4.6243	3.75862e-06	3.55246e-05
COL5A2	323.025	2.6587	0.359854	4.60937	4.03883e-06	3.80346e-05
TFAP2C	70.3333	2.83758	0.399166	4.60354	4.15367e-06	3.89817e-05
PRNP	59.4488	2.23178	0.269207	4.57557	4.74931e-06	4.42675e-05
RRAD	11.4349	5.07365	0.8917	4.56841	4.91435e-06	4.565e-05
NFE2L2	1867.63	1.94008	0.206533	4.5517	5.3213e-06	4.90962e-05
S100A2	6.27406	5.99343	1.10513	4.51841	6.23071e-06	5.71009e-05
S100A16	8.07979	6.34398	1.18508	4.50938	6.50175e-06	5.92385e-05
BHLHE40	27.0466	2.89266	0.421352	4.49187	7.05993e-06	6.40554e-05
TCTA	38.4434	2.42381	0.317253	4.48791	7.19236e-06	6.50409e-05
COL4A1	1209.44	1.88892	0.198212	4.48468	7.30246e-06	6.58186e-05
CD9	42.6717	2.47309	0.33068	4.45471	8.40047e-06	7.52187e-05
CASP8	12.1241	5.28826	0.964148	4.44772	8.6788e-06	7.74568e-05
CBR1	204.247	1.78396	0.177426	4.4185	9.93883e-06	8.84135e-05
FHL2	29.9311	2.93174	0.437848	4.4119	1.02469e-05	9.02722e-05
GRIA3	29.2627	3.78182	0.634645	4.38327	1.1691e-05	0.000102007
CA2	11.1684	4.94524	0.907584	4.34697	1.38029e-05	0.00012005
HK1	726.364	1.7758	0.178598	4.34386	1.40003e-05	0.000120996
TUBB6	78.7424	2.552	0.357283	4.3439	1.39975e-05	0.000120996
SGCB	311.304	1.9765	0.225288	4.33445	1.46126e-05	0.000125493
HLA-A	10.0006	4.82677	0.891109	4.29439	1.75172e-05	0.000149498
COL11A1	87.2322	2.12267	0.262059	4.28402	1.83542e-05	0.000156154
JUN	16.0893	3.72822	0.638384	4.27363	1.92313e-05	0.000162603
GPC1	172.18	1.91076	0.21346	4.26666	1.98417e-05	0.000166731
TICAM1	12.9479	4.3815	0.796281	4.24661	2.17029e-05	0.000181811
ELMOD1	51.2161	3.43252	0.576651	4.21835	2.46097e-05	0.000205533
EGF	134.929	2.6992	0.403128	4.21504	2.49733e-05	0.000207933
SNCA	222.469	1.92297	0.220087	4.19366	2.74492e-05	0.000227853
MT2A	20.4789	3.00899	0.480422	4.18172	2.89318e-05	0.000239433
EDNRA	50.105	2.74555	0.420036	4.1557	3.24287e-05	0.000267561
MAP2	649.458	1.87987	0.212355	4.1434	3.42187e-05	0.000280635
SNX7	703.432	1.8228	0.198898	4.1368	3.52186e-05	0.00028797
NR2F2	134.588	3.11182	0.511498	4.12869	3.64838e-05	0.000297425
MITF	14.2212	3.28876	0.554513	4.12751	3.66715e-05	0.000298065
G6PD	394.793	1.59531	0.144999	4.10562	4.0324e-05	0.000324852
POSTN	7.13608	5.73377	1.15285	4.10613	4.02338e-05	0.000324852
ABCB11	8.84694	5.13405	1.00994	4.09338	4.25124e-05	0.000339478
THRB	25.6781	3.27585	0.564145	4.03415	5.47995e-05	0.000435051
GALNT3	82.988	2.80164	0.447122	4.02942	5.59139e-05	0.000441332
HLA-E	135.863	2.28494	0.319651	4.01982	5.82423e-05	0.000458385
LGALS1	10.1988	5.38924	1.09248	4.01767	5.87771e-05	0.000461265
DIPK1A	218.029	2.16529	0.290098	4.01687	5.89751e-05	0.000461493
CEBPD	11.8962	4.17622	0.791288	4.01398	5.97033e-05	0.000465856
GLIS3	10.9001	4.59138	0.90667	3.96107	7.46141e-05	0.000578895
CAPS	37.7774	2.64918	0.420485	3.92209	8.7785e-05	0.000675326
SMAD1	90.1594	2.2802	0.327382	3.91041	9.21382e-05	0.000706825
MAOB	123.876	4.17114	0.812513	3.90287	9.50574e-05	0.000727176
MX1	18.3722	4.133	0.809844	3.86865	0.000109441	0.000832542
LAMP1	3097.04	1.78929	0.205631	3.8384	0.000123839	0.000936851
DDX60	113.525	2.23204	0.325357	3.78673	0.000152643	0.00114839
GDA	18.0566	4.69908	0.978588	3.78002	0.000156816	0.00117655
F3	199.829	2.10468	0.292982	3.77046	0.000162949	0.00121922
CFB	9.08701	4.59043	0.960644	3.73752	0.000185843	0.00137917
FLRT2	90.8356	2.7652	0.474937	3.71671	0.000201836	0.00148977
IL1B	4.13631	5.41116	1.19512	3.69098	0.000223394	0.00164002
PHLDA2	7.63595	5.218	1.14457	3.68521	0.000228516	0.00167313
DPP10	160.419	2.15109	0.313443	3.6724	0.000240283	0.00174524
GRIN2B	9.68883	5.05428	1.11328	3.64173	0.000270809	0.0019514
ISG15	25.7157	3.46152	0.67909	3.62473	0.000289263	0.00207343
MALT1	943.692	1.72252	0.199308	3.62515	0.000288799	0.00207343
CXCL12	8.25857	3.825	0.783304	3.60651	0.000310338	0.00221867
CRYAB	5.56557	5.20183	1.17305	3.58198	0.000341004	0.00243155
C3AR1	5.40199	5.1007	1.15582	3.54787	0.000388363	0.00274188
RAB27A	61.7825	1.96552	0.272374	3.54484	0.000392859	0.0027652
DYNLT3	217.8	1.84593	0.242073	3.49453	0.000474898	0.00329174
CX3CL1	627.348	1.68812	0.198919	3.45931	0.000541557	0.00373483
PRKG1	233.08	2.28854	0.373518	3.44973	0.00056115	0.00385051
CALCOCO1	46.4743	2.22079	0.354795	3.44083	0.000579938	0.00395953
ABCA8	5.76428	5.08329	1.18903	3.43414	0.000594448	0.00404847
GATA6	4.90517	4.91778	1.14215	3.43019	0.000603163	0.00409761
AKR1C3	8.03616	3.83281	0.826307	3.42828	0.000607418	0.00411627
MXRA5	577.775	1.99856	0.291472	3.42591	0.00061274	0.00414206
IFIT3	9.25187	3.58138	0.755255	3.41789	0.000631083	0.00424505
HERC6	38.5944	2.50424	0.441092	3.41026	0.000649009	0.0043549
GPAT3	4.59911	4.95216	1.16923	3.38014	0.000724492	0.00482583
MT1E	3.02176	5.06401	1.20699	3.36707	0.00075971	0.00502365
TRIM16L	241.786	1.96319	0.289183	3.33074	0.000866148	0.00568618
NFKBIZ	77.294	2.16122	0.350341	3.31455	0.000917905	0.00601151
P4HA2	85.2318	1.92676	0.280393	3.30522	0.000949005	0.00620032
CYP2E1	36.7753	2.46232	0.444789	3.28767	0.0010102	0.0065687
SLC1A2	9.72848	3.44439	0.74783	3.26864	0.00108064	0.00701006
TUBA1A	4919.36	1.81662	0.251367	3.24874	0.00115917	0.00746626
STAP2	25.0476	2.27823	0.395271	3.2338	0.00122155	0.00781278
HLA-DQA1	4.44617	5.65142	1.46639	3.17203	0.00151375	0.00963649
TAP1	5.4828	4.45413	1.0915	3.16459	0.00155304	0.00984071
SEMA3C	55.3081	2.14004	0.360764	3.16007	0.00157729	0.00997127
CLDN1	16.9403	2.77906	0.564256	3.15293	0.00161639	0.0101948
HMGCS1	3703.3	1.53377	0.169446	3.15006	0.00163236	0.0102718
PODXL	25.1165	2.56023	0.495618	3.14804	0.00164367	0.0103192
PROCR	3.04389	4.99752	1.28946	3.10015	0.00193422	0.0120602
GNS	232.493	1.62935	0.204599	3.07602	0.00209787	0.0129916
NMRAL2P	5.58504	3.64693	0.862108	3.07031	0.0021384	0.0132126
CALR	1401.83	1.89938	0.294606	3.05283	0.00226691	0.0139435
PHLDA3	10.2742	2.80818	0.596246	3.03261	0.00242447	0.0148792
RGCC	16.1022	4.51836	1.1666	3.01591	0.00256213	0.0156537
DUSP3	777.568	1.52324	0.174678	2.99545	0.00274036	0.016668
LEFTY2	2.44636	4.74467	1.25401	2.98616	0.00282509	0.0171452
SEMA6D	375.827	1.87083	0.291957	2.98275	0.00285671	0.0172986
PTGS2	4.59966	4.23269	1.08812	2.9709	0.00296932	0.0179012
TREM1	3.71692	5.39188	1.48394	2.95961	0.00308034	0.0185295
BIRC3	7.0195	3.39855	0.814151	2.94607	0.00321835	0.0192748
TMPPE	22.2236	2.27756	0.433999	2.94369	0.00324325	0.0193616
CTSS	12.8109	2.40271	0.477166	2.93966	0.00328573	0.0195497
NNMT	2.63299	4.69463	1.25745	2.9382	0.00330126	0.0195995
KLHL24	33.8994	2.12094	0.382882	2.92763	0.0034156	0.0202343
ADGRL4	26.9564	4.21354	1.10602	2.90551	0.00366655	0.0216271
SAT1	978.722	1.56882	0.201536	2.82243	0.00476615	0.0276356
UCHL1	1669.54	1.76662	0.272276	2.81561	0.00486852	0.0281693
IL1A	2.68858	4.62364	1.29124	2.80632	0.00501108	0.0288718
ARHGAP1	35.2223	1.79628	0.28483	2.79562	0.00518007	0.0297201
PROC	5.34232	3.4992	0.902393	2.76952	0.00561383	0.032074
WNT5A	970.575	1.73112	0.266474	2.74369	0.00607528	0.0344939
ECSCR	6.12054	4.0994	1.13105	2.74029	0.00613843	0.0347082
AMPD3	3.79772	4.17963	1.1638	2.73211	0.00629294	0.0355083
MMP1	18.7975	3.00402	0.734771	2.72741	0.00638346	0.0358709
SP110	27.0696	2.40432	0.516294	2.72	0.00652813	0.0364587
LIPA	747.76	1.79707	0.293706	2.71385	0.00665055	0.0369911
HLA-DQB1	5.05456	3.79106	1.02887	2.71275	0.00667264	0.0370386
GPR183	3.13927	4.70115	1.36525	2.71096	0.0067088	0.0371638
C1S	42.867	2.48139	0.546826	2.70906	0.00674738	0.0373018
PFKP	165.179	1.95488	0.354999	2.68983	0.00714894	0.0392832
DAG1	271.417	1.6078	0.226475	2.68375	0.00728023	0.0399243
LMOD1	13.9906	2.34187	0.502333	2.67129	0.00755613	0.0412716
COL16A1	9.18425	3.12913	0.79743	2.66999	0.00758532	0.0413483
ENC1	8.11787	2.88634	0.707291	2.66699	0.00765346	0.0416367
ST6GALNAC2	11.2401	3.03376	0.767658	2.6493	0.00806578	0.0437925
KRT81	4.17516	3.58224	0.976191	2.64522	0.00816383	0.044237
OAS1	7.85889	3.58299	0.977455	2.64257	0.008228	0.0444084
PLA2G2A	7.15447	6.33504	2.03612	2.62021	0.00878766	0.046965
DOCK2	6.3299	3.64731	1.01371	2.6115	0.00901449	0.0480832

## Sheet: Suppl. Table S4
upregulated genes:								downregulated genes:
	baseMean	log2FoldChange	lfcSE	stat	pvalue	padj			baseMean	log2FoldChange	lfcSE	stat	pvalue	padj
ANXA1	8264.27	9.2091	0.225693	38.5882	0	0		HMGA2	2546.05	-6.75314	0.268107	-23.3233	2.57004e-120	2.28734e-117
CD44	2814.18	9.51911	0.293638	30.7151	3.58035e-207	4.77977e-204		SLC38A1	1010.14	-4.85529	0.234295	-18.5889	3.95077e-77	9.58958e-75
TNC	3769.19	8.35052	0.3433	22.8678	9.71834e-116	6.48699e-113		CCND2	234.849	-4.27582	0.214814	-17.5771	3.68724e-69	6.25308e-67
ARID5B	635.583	5.06921	0.206294	22.149	1.06574e-108	5.69106e-106		GREB1	167.077	-6.07025	0.413026	-13.4864	1.87997e-41	1.19512e-39
CCN2	1986.86	6.14786	0.262554	21.5112	1.22195e-102	5.43768e-100		CRABP2	221.265	-6.29874	0.447422	-12.9603	2.05374e-38	1.0967e-36
CSRP1	1306.44	5.47399	0.231583	21.4782	2.48829e-102	9.49104e-100		DSP	73.0769	-5.22614	0.385447	-12.2614	1.45872e-34	6.60132e-33
NQO1	728.851	4.58032	0.20898	19.525	6.73454e-85	2.24765e-82		KIT	302.842	-6.11875	0.458566	-12.2529	1.62142e-34	7.21532e-33
HTRA1	1293.87	6.21849	0.303123	18.8653	2.20222e-79	6.53326e-77		ATP1A2	310.71	-11.0451	0.878536	-12.003	3.42549e-33	1.40709e-31
CAV1	1178.34	9.63497	0.487123	18.7529	1.83373e-78	4.89606e-76		FZD10	123.117	-9.69277	0.838652	-10.9614	5.86058e-28	1.93182e-26
FSTL1	2193.38	3.05872	0.139199	18.3818	1.83932e-75	4.09248e-73		INA	119.559	-3.82615	0.309461	-10.7482	6.04153e-27	1.92034e-25
CCL2	1109.35	6.9804	0.363566	17.8246	4.55739e-71	9.36019e-69		DDC	62.0155	-10.1463	0.911059	-10.588	3.38712e-26	1.01614e-24
ADAM12	1721.23	6.62653	0.348553	17.577	3.69349e-69	6.25308e-67		EPHB6	70.4453	-8.04897	0.724986	-10.4126	2.17282e-25	6.23809e-24
TRIM22	271.585	7.08716	0.374777	17.5762	3.74716e-69	6.25308e-67		SST	42.7221	-4.6711	0.409463	-10.1868	2.27227e-24	6.19077e-23
TAGLN	2886.28	7.57381	0.412839	17.1345	8.20015e-66	1.28791e-63		FGF8	49.4355	-9.88214	0.942198	-9.95772	2.33344e-23	5.76878e-22
ITGAV	2500.55	3.57231	0.182129	16.8689	7.62025e-64	1.13034e-61		H2BC6	83.1996	-4.2967	0.399659	-9.49986	2.1018e-21	5.05569e-20
IGFBP3	827.7	8.15126	0.463892	16.4936	4.07686e-61	5.72906e-59		DMRTA1	137.953	-3.52825	0.318807	-9.49869	2.12551e-21	5.06706e-20
RAB31	400.728	3.11986	0.163466	16.0269	8.29111e-58	1.10686e-55		PPM1E	74.0107	-2.54475	0.219071	-9.33374	1.02201e-20	2.29307e-19
SPP1	820.938	6.79865	0.39391	15.9901	1.49842e-57	1.90514e-55		H2BC14	385.643	-4.04222	0.381278	-9.29038	1.53733e-20	3.42055e-19
SCARA3	296.842	3.65677	0.1975	15.9836	1.66174e-57	2.01675e-55		PHOX2A	25.988	-8.95009	0.913111	-9.25418	2.15878e-20	4.72455e-19
PSMB8	148.557	5.36968	0.306086	15.9095	5.44216e-57	6.31764e-55		DUSP6	62.9852	-4.3286	0.416203	-9.19887	3.61717e-20	7.85191e-19
MBNL2	1006.22	3.54735	0.194634	15.6568	2.98673e-55	3.32274e-53		IKZF1	35.0545	-9.31647	0.95929	-9.19062	3.90568e-20	8.40981e-19
MYL9	1363.61	6.51044	0.385405	15.5951	7.85539e-55	8.38956e-53		LMO3	47.3144	-2.73557	0.246253	-9.07835	1.10237e-19	2.28166e-18
EMP1	573.811	6.61151	0.39393	15.5142	2.78066e-54	2.85552e-52		H2BC3	1003.31	-3.32905	0.311684	-9.07665	1.11969e-19	2.29968e-18
NRCAM	1880.69	3.53577	0.195896	15.4969	3.64046e-54	3.60001e-52		MDK	2278.64	-2.19078	0.18656	-9.06296	1.26957e-19	2.58759e-18
GSN	362.765	3.77085	0.214652	15.2379	1.98165e-52	1.88965e-50		FLRT3	819.755	-3.45034	0.32831	-8.98644	2.55375e-19	5.16554e-18
GFAP	860.488	10.1582	0.636631	15.1708	5.52303e-52	5.08499e-50		ARSG	104.704	-3.25844	0.307005	-8.98501	2.58714e-19	5.19373e-18
GAP43	1782.93	4.37536	0.265153	14.6156	2.23536e-48	1.98947e-46		LEF1	266.489	-2.67771	0.243077	-8.95893	3.27858e-19	6.48431e-18
PSMB9	173.822	6.0403	0.379891	14.5839	3.55415e-48	3.06116e-46		CDH7	57.1478	-9.19623	0.98669	-8.81354	1.21259e-18	2.29619e-17
AMIGO2	356.442	4.6268	0.284345	14.5133	9.97511e-48	8.32298e-46		COL2A1	78.6634	-8.18868	0.888463	-8.65391	4.97635e-18	8.97761e-17
A2M	516.71	7.34952	0.473686	14.46	2.16664e-47	1.75301e-45		DUSP4	327.365	-2.69847	0.256934	-8.55656	1.1629e-17	2.06997e-16
SOX9	449.467	3.93267	0.241702	14.202	8.89826e-46	6.98775e-44		CDC7	95.5935	-2.60541	0.25311	-8.31817	8.93302e-17	1.51918e-15
CYBRD1	302.077	4.0317	0.248977	14.1848	1.13758e-45	8.67814e-44		FGF18	42.3575	-8.63435	0.987225	-8.23961	1.7277e-16	2.90124e-15
ACTA2	1626.4	4.43	0.278026	14.1354	2.29938e-45	1.70537e-43		CD55	19.4254	-4.02737	0.436453	-8.08189	6.37719e-16	1.01959e-14
PHLDA1	1073.6	3.91482	0.243252	14.0382	9.09543e-45	6.56346e-43		GLI1	19.5204	-4.7387	0.526394	-8.05234	8.12252e-16	1.27571e-14
HMOX1	155.558	5.27787	0.341949	13.9725	2.29533e-44	1.61277e-42		MAL2	85.8858	-4.5307	0.511361	-7.8823	3.21413e-15	4.87599e-14
TAPBP	401.471	2.72506	0.160542	13.8597	1.11211e-43	7.61366e-42		TBC1D10C	28.9621	-7.60467	0.907324	-7.83035	4.86498e-15	7.29747e-14
CDH6	1424.07	2.52189	0.146096	13.8395	1.4729e-43	9.83162e-42		GAD1	41.9674	-3.90058	0.439743	-7.7331	1.04956e-14	1.53133e-13
PPP1CB	4736.27	2.70188	0.159395	13.814	2.0998e-43	1.36743e-41		DCX	182.26	-4.4593	0.513771	-7.70635	1.29465e-14	1.87865e-13
IQGAP1	738.055	2.72135	0.165121	13.4529	2.9613e-41	1.83876e-39		DBH	19.093	-7.54254	0.914308	-7.70259	1.33334e-14	1.92433e-13
SHB	258.083	3.68686	0.237708	13.4066	5.5304e-41	3.35595e-39		DCC	28.3823	-7.72658	0.956017	-7.55905	4.06027e-14	5.70575e-13
SEMA3A	566.754	2.65742	0.163352	13.2072	7.97303e-40	4.73066e-38		FAM72A	818.985	-2.74197	0.298761	-7.50421	6.18023e-14	8.59438e-13
TGFB2	232.854	5.9524	0.41496	13.1396	1.95346e-39	1.13386e-37		HES5	118.083	-5.12721	0.617012	-7.49939	6.41164e-14	8.82426e-13
PDLIM1	260.527	4.29543	0.289148	13.1263	2.32827e-39	1.32265e-37		PLA2G7	20.5818	-5.30928	0.647174	-7.43119	1.07626e-13	1.47365e-12
CAV2	333.69	8.94687	0.644906	13.0978	3.38822e-39	1.8847e-37		CTTNBP2	23.032	-4.51507	0.541115	-7.42	1.17124e-13	1.5794e-12
ACTN1	8761.89	3.15523	0.204202	13.0029	1.17737e-38	6.41546e-37		PHLDB2	200.233	-1.83913	0.180888	-7.40309	1.33053e-13	1.77626e-12
CD34	282.858	8.00385	0.580574	12.9249	3.25844e-38	1.70589e-36		SDK2	339.465	-3.61256	0.422639	-7.36459	1.77698e-13	2.33722e-12
LRP10	541.244	2.86777	0.184238	12.8517	8.41699e-38	4.3218e-36		MTF2	301.615	-1.72435	0.167648	-7.30309	2.81237e-13	3.64516e-12
PALMD	285.665	7.43434	0.543098	12.7681	2.47035e-37	1.2445e-35		FGF17	9.70921	-7.54272	0.974362	-7.22803	4.90042e-13	6.14278e-12
COL5A1	253.136	4.1591	0.291056	12.5718	3.01751e-36	1.49199e-34		UGT2B7	14.5466	-4.32245	0.531781	-7.18802	6.57384e-13	8.16379e-12
PLAAT4	226.472	6.37972	0.46932	12.5282	5.23438e-36	2.54105e-34		MND1	190.153	-2.81683	0.324346	-7.14309	9.12586e-13	1.11771e-11
TNFRSF12A	154.383	6.56242	0.485777	12.4798	9.6181e-36	4.58577e-34		CCNG1	2145.43	-1.81645	0.185017	-7.11531	1.11664e-12	1.36138e-11
FBXO32	260.134	7.28958	0.547796	12.3943	2.80425e-35	1.31357e-33		SLC25A13	220.446	-1.69837	0.169276	-7.0794	1.44783e-12	1.74919e-11
OLFML2B	325.455	3.71062	0.260012	12.348	4.99574e-35	2.29976e-33		PGF	37.1548	-5.19792	0.664222	-7.07281	1.51823e-12	1.82598e-11
BCL3	99.7358	5.04692	0.371347	12.2444	1.80018e-34	7.87949e-33		TFAP2A	53.2419	-4.1988	0.525555	-7.03789	1.9517e-12	2.30577e-11
SERPINE1	638.907	10.7856	0.851131	12.0846	1.27317e-33	5.48284e-32		ZFAND1	130.963	-1.87066	0.197944	-6.9245	4.37515e-12	5.01359e-11
PLAU	143.896	6.72537	0.517982	12.0185	2.84072e-33	1.20392e-31		PHGDH	120.754	-3.3004	0.405349	-6.90861	4.89415e-12	5.58435e-11
COL1A1	494.74	6.98106	0.539853	12.0052	3.33506e-33	1.39134e-31		FKBP5	152.843	-2.10373	0.235623	-6.80632	1.0013e-11	1.12804e-10
ANXA2	1616.44	4.25113	0.313436	11.9678	5.24124e-33	2.12032e-31		ASNS	2355.7	-3.75609	0.495181	-6.57554	4.84756e-11	5.3045e-10
ETS1	210.133	4.93198	0.374102	11.847	2.23043e-32	8.88845e-31		SULT1C2	9.35977	-6.89147	0.979155	-6.52753	6.6861e-11	7.19834e-10
FTL	289.449	2.87084	0.200601	11.8187	3.12386e-32	1.22657e-30		SLC27A2	7.89013	-7.15123	1.01917	-6.52609	6.75065e-11	7.23865e-10
NT5E	382.002	9.61254	0.778407	11.7067	1.17828e-31	4.55943e-30		H2BC8	96.8661	-2.41341	0.294369	-6.50002	8.0311e-11	8.54305e-10
IFITM3	1157.09	3.91083	0.291619	11.6962	1.33295e-31	5.08426e-30		DEPDC1B	849.88	-2.21527	0.265503	-6.46046	1.04386e-10	1.09298e-09
OLFML2A	416.017	7.02401	0.559098	11.6688	1.83974e-31	6.91846e-30		ELAVL4	13.9511	-6.11806	0.877594	-6.40166	1.53693e-10	1.59673e-09
CRIM1	2776.3	4.72369	0.363346	11.6244	3.09633e-31	1.14822e-29		TRIB1	50.6245	-2.24266	0.273837	-6.36385	1.96754e-10	2.01277e-09
LOXL1	959.206	4.16669	0.317509	11.5483	7.52813e-31	2.75344e-29		ONECUT1	9.06924	-6.47063	0.945811	-6.31271	2.74184e-10	2.773e-09
AXL	130.29	3.53318	0.267642	11.333	9.00916e-30	3.2506e-28		SOX1	16.6835	-3.29679	0.448391	-6.23739	4.44932e-10	4.43272e-09
LMNA	2222.52	3.03086	0.223518	11.3228	1.01137e-29	3.60046e-28		H1-0	17.4934	-5.21052	0.758713	-6.20857	5.34681e-10	5.30706e-09
COL3A1	215.004	6.0793	0.495334	11.2637	1.98237e-29	6.96437e-28		SALL3	9.56877	-6.48572	0.974865	-6.14005	8.24962e-10	8.09798e-09
IRF1	184.536	2.91276	0.214701	11.2378	2.65986e-29	9.22314e-28		ISL1	8.52477	-6.7648	1.03706	-6.04091	1.53243e-09	1.47711e-08
TIMP3	163.765	3.21504	0.245705	11.05	2.19312e-28	7.50722e-27		PLS1	141.51	-2.21902	0.285327	-6.02473	1.69388e-09	1.62164e-08
IFITM1	245.417	4.02028	0.319473	11.019	3.094e-28	1.04569e-26		MAP7	271.152	-3.18642	0.449204	-5.98041	2.22578e-09	2.10738e-08
CCDC80	169.928	3.66783	0.288029	10.9983	3.89381e-28	1.29956e-26		ZNF589	125.924	-1.69233	0.201081	-5.92961	3.03658e-09	2.81516e-08
KLF5	67.7513	5.74973	0.482379	10.883	1.389e-27	4.52272e-26		MYO10	313.037	-1.70812	0.205191	-5.88779	3.91392e-09	3.61597e-08
PSAP	307.4	2.77305	0.211457	10.7495	5.95781e-27	1.91655e-25		VRK1	972.39	-1.59828	0.188851	-5.81558	6.0424e-09	5.46888e-08
H2AC6	222.641	3.33403	0.264214	10.7262	7.66518e-27	2.40777e-25		CD24	120.495	-2.50997	0.347696	-5.78082	7.43367e-09	6.66037e-08
IER3	205.72	3.89368	0.317196	10.699	1.02864e-26	3.19356e-25		ABCB1	31.2891	-5.32306	0.836655	-5.7647	8.18047e-09	7.2324e-08
EDN1	161.747	7.78678	0.686142	10.6199	2.40745e-26	7.38837e-25		P2RX3	12.5328	-5.97679	0.952001	-5.75292	8.77139e-09	7.68501e-08
KLF6	119.388	2.92017	0.228413	10.5956	3.12271e-26	9.47459e-25		TMEM97	1728.38	-1.80438	0.226731	-5.753	8.76719e-09	7.68501e-08
GCLM	558.643	1.89542	0.132351	10.5433	5.45239e-26	1.61754e-24		NCAN	58.2882	-3.43932	0.51243	-5.73604	9.69133e-09	8.40125e-08
VCAM1	185.164	5.00322	0.429035	10.4962	8.99715e-26	2.63982e-24		PAX8	14.3392	-6.99649	1.13662	-5.71562	1.09306e-08	9.4449e-08
ABHD4	187.972	3.00727	0.24075	10.4144	2.13085e-25	6.18409e-24		MTHFD2	4080.07	-2.72747	0.391214	-5.69375	1.24281e-08	1.07042e-07
ARL4C	1203.95	2.36998	0.179994	10.3891	2.7801e-25	7.89666e-24		GABRB3	27.028	-3.28896	0.49068	-5.68388	1.31676e-08	1.13047e-07
SAMD9L	73.2568	6.57802	0.590895	10.2861	8.13782e-25	2.28715e-23		STMN2	8.45315	-6.0199	0.971361	-5.68265	1.32626e-08	1.13497e-07
ANXA2P2	5160.67	3.81303	0.323305	10.2474	1.21586e-24	3.38161e-23		RPRM	19.2352	-3.22243	0.480402	-5.66698	1.45336e-08	1.23582e-07
GBP1	338.535	5.04368	0.444823	10.2146	1.70615e-24	4.69631e-23		EGR1	174.972	-2.09675	0.28383	-5.62572	1.84732e-08	1.56583e-07
TPM1	114.733	3.88578	0.335196	10.1009	5.47396e-24	1.47631e-22		BZW2	80.7816	-1.82248	0.235315	-5.62005	1.90902e-08	1.613e-07
PRSS23	180.66	4.51386	0.397846	10.089	6.18164e-24	1.6505e-22		KCNQ2	16.4868	-3.60278	0.553236	-5.60843	2.04169e-08	1.71966e-07
RBP1	3917.1	2.25997	0.174939	10.0605	8.25873e-24	2.18325e-22		IPO5	516.959	-1.25517	0.135	-5.59387	2.22063e-08	1.86449e-07
ITGA11	104.873	6.55612	0.604048	10.0259	1.17284e-23	3.07009e-22		DTL	278.98	-1.7073	0.21676	-5.56975	2.55112e-08	2.12859e-07
PDPN	3439.55	2.47542	0.197188	10.018	1.27082e-23	3.29426e-22		STC2	8.76786	-4.57158	0.739348	-5.50699	3.65022e-08	2.98045e-07
LINC01279	152.269	4.03761	0.353612	10.0042	1.46016e-23	3.74869e-22		WDR72	5.66545	-6.15572	1.0308	-5.48675	4.0939e-08	3.33253e-07
FAS	189.206	3.17739	0.267752	9.99952	1.53137e-23	3.89405e-22		CDT1	328.353	-2.47674	0.363834	-5.43307	5.53938e-08	4.42819e-07
IL13RA2	135.754	5.86412	0.538312	9.96471	2.17504e-23	5.47864e-22		H3C2	2307.96	-2.37641	0.346532	-5.41483	6.13462e-08	4.88939e-07
ME1	2179.55	2.76915	0.227801	9.96109	2.25576e-23	5.62886e-22		PLAGL1	56.6712	-3.83966	0.623169	-5.35915	8.36133e-08	6.60495e-07
GLRX	389.493	2.67617	0.223472	9.73802	2.07555e-22	5.08415e-21		BMF	35.1145	-2.54774	0.383951	-5.33332	9.64327e-08	7.5728e-07
ANXA5	1053.75	2.03878	0.159099	9.67183	3.97218e-22	9.64157e-21		SDC1	75.5088	-2.24055	0.32948	-5.28272	1.2728e-07	9.85038e-07
ACOX1	116.888	2.30023	0.190483	9.45085	3.36082e-21	7.94104e-20		CENPH	965.649	-2.48064	0.37573	-5.27145	1.35347e-07	1.04444e-06
CNN1	265.556	3.51081	0.318709	9.44691	3.48986e-21	8.17361e-20		BOD1	152.916	-1.40939	0.173221	-5.2499	1.52178e-07	1.16501e-06
IFI6	610.072	3.35456	0.30262	9.43282	3.99221e-21	9.26887e-20		HSP90AB1	2779.72	-1.5051	0.191456	-5.24978	1.5228e-07	1.16501e-06
PARP14	235.502	3.39931	0.308016	9.41283	4.82948e-21	1.11161e-19		PFAS	391.601	-1.26855	0.148853	-5.16316	2.42818e-07	1.83661e-06
MVP	47.9469	3.45223	0.313987	9.4024	5.33346e-21	1.21712e-19		CHAC1	41.0433	-3.11475	0.509212	-5.13488	2.82321e-07	2.11741e-06
CDH11	597.265	4.07718	0.382644	9.34859	8.88261e-21	2.00988e-19		MTNR1A	8.82122	-4.64001	0.807242	-5.12859	2.9192e-07	2.17717e-06
CNN3	13506.6	2.42696	0.208046	9.26215	2.00357e-20	4.42109e-19		INHBE	7.62451	-6.65899	1.20645	-5.10507	3.30676e-07	2.44572e-06
PPARG	53.5827	4.13488	0.396356	9.17077	4.69674e-20	1.00322e-18		FANCI	127.62	-2.30749	0.355334	-5.08674	3.64268e-07	2.67929e-06
COL12A1	110.743	4.86422	0.478266	9.12509	7.16767e-20	1.51886e-18		H2BC5	4816.09	-2.16297	0.326957	-5.08622	3.65267e-07	2.67929e-06
EPHX1	415.551	2.2168	0.188553	9.1051	8.6188e-20	1.81198e-18		KIF15	514.746	-1.97537	0.291143	-5.06752	4.03033e-07	2.94016e-06
HLA-DRA	148.254	8.37664	0.866268	9.09261	9.66866e-20	2.01682e-18		AMER1	95.8841	-2.13775	0.323306	-5.06565	4.07013e-07	2.9536e-06
GADD45B	49.0678	3.2583	0.307297	8.97601	2.80758e-19	5.59421e-18		RFC4	99.2233	-2.13869	0.323493	-5.06561	4.07088e-07	2.9536e-06
RUNX1	189.885	9.90256	1.0535	8.92505	4.45499e-19	8.74619e-18		EOMES	15.5402	-6.74879	1.24318	-5.02646	4.99617e-07	3.58596e-06
B2M	542.698	2.64242	0.24031	8.91525	4.867e-19	9.48533e-18		HES1	201.953	-1.40634	0.18134	-4.99804	5.79157e-07	4.14571e-06
TIMP1	235.057	2.91619	0.27302	8.84987	8.76238e-19	1.69533e-17		CTH	63.2656	-2.21794	0.344018	-4.99377	5.92131e-07	4.22725e-06
ATP6V0E1	3845.3	2.24957	0.198262	8.82456	1.09895e-18	2.11093e-17		APBB2	53.2348	-1.85203	0.272264	-4.96588	6.83901e-07	4.84354e-06
PPARGC1A	110.109	2.48635	0.225269	8.81768	1.16851e-18	2.22852e-17		OLIG2	10.1394	-5.5819	1.0252	-4.95697	7.16004e-07	5.05749e-06
CD58	488.865	2.24922	0.198635	8.8062	1.29458e-18	2.43418e-17		SLC2A1	209.757	-2.83933	0.472452	-4.95147	7.36564e-07	5.18899e-06
CHN1	651.427	2.18197	0.191031	8.8047	1.312e-18	2.44968e-17		TXNIP	250.752	-2.74741	0.455713	-4.93163	8.15478e-07	5.72457e-06
MYC	600.985	2.01425	0.172591	8.77363	1.72995e-18	3.20762e-17		HOXD4	27.0692	-3.47884	0.605135	-4.9226	8.54018e-07	5.96918e-06
AIFM2	69.4281	3.30482	0.320292	8.75708	2.00367e-18	3.68952e-17		HOMER1	141.974	-1.44443	0.192238	-4.91281	8.97822e-07	6.24267e-06
SRPX	265.714	2.65179	0.247441	8.69619	3.43226e-18	6.27681e-17		SKA1	142.689	-1.72639	0.250129	-4.90301	9.43788e-07	6.54523e-06
FEZ2	1344.22	1.70587	0.139281	8.65785	4.8074e-18	8.7318e-17		DMTN	14.9662	-3.02978	0.516194	-4.90083	9.5434e-07	6.60126e-06
PPIC	199.91	2.92707	0.281727	8.61498	6.99562e-18	1.25358e-16		RPS3	467.385	-1.59373	0.224616	-4.8693	1.11992e-06	7.66717e-06
S100B	303.023	4.69092	0.492752	8.50513	1.81397e-17	3.20747e-16		RFC3	366.244	-1.70609	0.248764	-4.84832	1.24512e-06	8.43776e-06
IFIT1	749.593	3.30737	0.331048	8.48026	2.24692e-17	3.94689e-16		OPN3	101.097	-1.27859	0.161257	-4.82826	1.37733e-06	9.29341e-06
ITGA4	257.806	4.28467	0.446839	8.46988	2.45655e-17	4.28692e-16		CYP39A1	13.7721	-2.79772	0.477449	-4.8125	1.49058e-06	9.99959e-06
NEAT1	758.913	3.78799	0.38902	8.452	2.86347e-17	4.96459e-16		OLIG1	43.3141	-6.76964	1.30801	-4.79326	1.64089e-06	1.09804e-05
FOXA1	41.9257	3.30096	0.331524	8.44877	2.94395e-17	5.0712e-16		EXOSC8	372.372	-1.86681	0.287037	-4.76178	1.91892e-06	1.27134e-05
CSRNP1	97.6869	3.06099	0.303675	8.43331	3.36026e-17	5.75121e-16		CDCA5	96.2048	-1.72329	0.257089	-4.75825	1.95283e-06	1.29061e-05
ITGB1	875.686	2.45542	0.235742	8.29477	1.08797e-16	1.83854e-15		TRGC2	6.5528	-6.43399	1.26921	-4.67536	2.93443e-06	1.91563e-05
NCEH1	92.3299	2.53824	0.250307	8.14297	3.85698e-16	6.43633e-15		MCM2	10.5405	-3.02592	0.543432	-4.64809	3.35029e-06	2.17353e-05
HLA-B	31.0048	4.80514	0.530168	8.12034	4.64884e-16	7.70956e-15		PPP1CC	2144.5	-1.65128	0.248134	-4.63977	3.48789e-06	2.24944e-05
AHR	45.3483	5.40915	0.60474	8.11779	4.74759e-16	7.82473e-15		FAM72C	94.5977	-2.34998	0.400201	-4.62264	3.78885e-06	2.43179e-05
VIM	10057	1.85919	0.167549	8.1122	4.97103e-16	8.14272e-15		RAD51AP1	130.338	-1.82638	0.286915	-4.62291	3.78396e-06	2.43179e-05
THBS1	59.0525	8.97189	1.04483	8.10839	5.12941e-16	8.35092e-15		RMI1	191.818	-1.27547	0.167912	-4.6183	3.86894e-06	2.47131e-05
ACTG2	118.417	9.2394	1.07796	8.10739	5.17208e-16	8.36936e-15		POLE2	258.655	-1.54893	0.227864	-4.60334	4.15777e-06	2.64946e-05
FOSL1	92.7019	4.31374	0.471201	8.09366	5.78973e-16	9.31239e-15		VEGFA	162.338	-1.72796	0.267216	-4.59538	4.31956e-06	2.73949e-05
TIMP2	32.2354	4.484	0.493555	8.07206	6.91247e-16	1.09859e-14		NR2F6	13.338	-3.0439	0.558585	-4.55418	5.25905e-06	3.31171e-05
PAX6	34.0361	4.29217	0.470115	8.06648	7.2351e-16	1.14306e-14		COL15A1	5.7858	-5.56906	1.11422	-4.54942	5.3795e-06	3.37166e-05
EGLN3	38.3279	3.25597	0.342392	8.04918	8.33531e-16	1.30148e-14		HSPA1A	18.9465	-3.1281	0.577782	-4.54861	5.40022e-06	3.37672e-05
EEA1	296.262	1.84591	0.167507	8.03492	9.3641e-16	1.45361e-14		FOS	27.0912	-2.854	0.517732	-4.54676	5.44782e-06	3.39852e-05
EFNA1	73.5317	4.23469	0.465065	8.03047	9.70978e-16	1.49856e-14		H3C4	4614.36	-2.07687	0.348062	-4.53043	5.88647e-06	3.63816e-05
THY1	120.323	3.96383	0.432963	8.0003	1.24118e-15	1.90457e-14		ATAD5	66.6866	-2.04455	0.341301	-4.52548	6.02595e-06	3.70721e-05
NR2F1	785.572	3.35201	0.360042	7.92131	2.35021e-15	3.58574e-14		ETV1	17.9287	-2.87608	0.531198	-4.47305	7.71115e-06	4.66866e-05
TRAK2	87.7847	2.38414	0.240535	7.8331	4.7597e-15	7.17988e-14		SMARCC1	172.371	-1.79948	0.290869	-4.46756	7.91152e-06	4.76834e-05
MAP1LC3B	775.72	1.75494	0.16074	7.8073	5.84253e-15	8.71484e-14		VAV3	15.3441	-3.42171	0.653916	-4.46802	7.89478e-06	4.76834e-05
TGFB3	46.7704	3.82507	0.426297	7.79989	6.19604e-15	9.19079e-14		H1-2	3406.08	-1.80277	0.292701	-4.45086	8.5526e-06	5.14312e-05
HSPB8	68.9361	5.74338	0.674194	7.77725	7.41179e-15	1.09334e-13		CIT	183.461	-1.80162	0.293508	-4.4347	9.22012e-06	5.51967e-05
AFP	47.6647	8.66127	1.05415	7.74205	9.78291e-15	1.43518e-13		H2BC4	2072.11	-1.9495	0.329076	-4.40477	1.05898e-05	6.29728e-05
CTSB	1153.83	2.30865	0.234876	7.70043	1.35612e-14	1.94669e-13		H2BC15	38.8252	-2.0232	0.347632	-4.38163	1.17793e-05	6.97358e-05
SRXN1	40.8938	3.07348	0.335823	7.6632	1.81355e-14	2.5894e-13		TTYH1	36.603	-1.57448	0.248766	-4.31925	1.56558e-05	9.187e-05
SLIT2	681.642	3.16717	0.34828	7.65814	1.88648e-14	2.67921e-13		LIG1	55.364	-1.8383	0.310679	-4.30767	1.64983e-05	9.66022e-05
ID1	1020.58	4.13555	0.477996	7.60581	2.83124e-14	3.99969e-13		HHIP	32.7726	-2.93773	0.566251	-4.30504	1.66953e-05	9.75418e-05
G6PD	394.793	1.59531	0.144999	7.55392	4.22338e-14	5.90388e-13		LBR	126.405	-1.76268	0.295028	-4.27986	1.87009e-05	0.000108311
TUBB2A	1281.05	1.90258	0.187012	7.49997	6.38313e-14	8.82426e-13		ORC6	131.317	-1.65891	0.272122	-4.25878	2.05542e-05	0.000118531
FLNA	1742.38	2.23703	0.233794	7.42977	1.0879e-13	1.48198e-12		TOP2A	222.411	-1.96734	0.34484	-4.25513	2.0893e-05	0.000119709
PDGFB	53.7514	6.73009	0.839114	7.42461	1.13114e-13	1.53307e-12		JPT2	313.118	-1.10594	0.144296	-4.19929	2.67752e-05	0.000152106
CASP1	42.7147	7.47067	0.940647	7.41051	1.25814e-13	1.68806e-12		IGFBP4	20.9619	-3.08435	0.616076	-4.19485	2.73053e-05	0.000154788
SCN2A	30.8187	5.99439	0.742648	7.39838	1.3786e-13	1.83127e-12		CTNNAL1	402.097	-1.21852	0.171884	-4.18026	2.91176e-05	0.000164712
ABCC3	30.4139	8.4217	1.07523	7.36747	1.73893e-13	2.29848e-12		TMEM45A	48.3713	-1.60981	0.266808	-4.15958	3.18835e-05	0.000179597
DTX3L	27.2189	4.93021	0.603057	7.34626	2.03827e-13	2.66773e-12		HELLS	338.205	-1.7674	0.304884	-4.15701	3.22446e-05	0.000180963
EPHA3	56.8305	8.24959	1.05523	7.34398	2.07335e-13	2.70041e-12		LIX1	167.742	-3.53463	0.731658	-4.14761	3.35965e-05	0.000188056
BBOX1	56.7048	9.13783	1.18432	7.29348	3.02045e-13	3.89594e-12		NRG2	9.53289	-3.01601	0.611058	-4.11746	3.83064e-05	0.000213079
STK10	159.839	2.04626	0.212174	7.2877	3.1529e-13	4.04723e-12		DEPDC1	216.205	-1.59375	0.26756	-4.08786	4.35364e-05	0.000239182
GJA1	366.335	1.9889	0.20433	7.28674	3.1754e-13	4.05661e-12		WASF3	124.269	-1.43146	0.229709	-4.05496	5.01426e-05	0.000273785
BCL2L1	1330.37	2.03818	0.211491	7.27303	3.515e-13	4.46907e-12		SEPTIN10	766.735	-1.04567	0.135244	-4.03472	5.46679e-05	0.000297277
MAP1LC3A	155.425	2.14541	0.227241	7.24083	4.45963e-13	5.64323e-12		PRKX	20.0886	-2.03881	0.382063	-4.02763	5.63431e-05	0.000305144
CBR1	204.247	1.78396	0.177426	7.23657	4.60176e-13	5.79561e-12		L1CAM	114.04	-1.76844	0.316337	-4.00976	6.07807e-05	0.00032748
PLXDC2	1334.64	2.92478	0.336964	7.19596	6.2022e-13	7.73825e-12		RAD54L	162.198	-1.76242	0.314852	-4.00955	6.08353e-05	0.00032748
TPPP3	202.103	3.22318	0.379817	7.16972	7.5152e-13	9.28962e-12		GUCY1A1	8.23704	-3.0979	0.648024	-4.00895	6.09894e-05	0.000327649
HK1	726.364	1.7758	0.178598	7.14345	9.10187e-13	1.11771e-11		CDC25A	27.8457	-1.69083	0.297723	-3.99981	6.3393e-05	0.000339197
CARMIL1	97.1174	3.90061	0.480139	7.08254	1.41533e-12	1.7177e-11		EZH2	315.499	-1.68031	0.296237	-3.98435	6.76652e-05	0.000358464
PINK1	278.228	2.28803	0.252995	7.06746	1.57801e-12	1.88936e-11		SFRP2	248.235	-3.82942	0.839523	-3.96584	7.31366e-05	0.000385157
TRAM2	341.097	2.6667	0.307178	7.05355	1.7441e-12	2.0789e-11		H2AC19	1812.26	-1.87404	0.347245	-3.95698	7.59028e-05	0.000398938
MSMO1	2122.96	1.266	0.108776	7.04195	1.89563e-12	2.24948e-11		RPL32	50.4646	-1.48923	0.250287	-3.95237	7.73815e-05	0.000405115
CLU	46.793	5.11273	0.655838	7.03334	2.01651e-12	2.37184e-11		LMNB1	706.921	-1.70941	0.306321	-3.94818	7.87467e-05	0.000411455
COL4A1	1209.44	1.88892	0.198212	7.00722	2.43091e-12	2.84673e-11		PSAT1	146.099	-1.76772	0.32164	-3.94144	8.09933e-05	0.000421544
NFE2L2	1867.63	1.94008	0.206533	6.97262	3.11083e-12	3.62703e-11		GHR	5.37296	-4.15158	0.92942	-3.92888	8.53422e-05	0.000442453
NRG1	40.2924	2.76641	0.32641	6.94346	3.82602e-12	4.44151e-11		H2AC8	390.473	-2.36094	0.473752	-3.92809	8.56222e-05	0.000443045
FNDC4	27.7887	6.32245	0.839366	6.93673	4.01277e-12	4.63813e-11		TRPC6	15.8911	-8.25089	1.98242	-3.90981	9.23669e-05	0.000477021
MFAP5	51.5038	8.4355	1.14486	6.93141	4.16661e-12	4.7952e-11		H2BC13	2885.28	-1.75912	0.322514	-3.90409	9.458e-05	0.000487507
HLA-DRB4	40.5497	6.50412	0.872132	6.88442	5.80228e-12	6.59237e-11		AURKB	217.948	-1.76462	0.325529	-3.88482	0.000102405	0.00052581
NR3C1	119.713	3.1671	0.388213	6.8702	6.41131e-12	7.25347e-11		SP8	5.33603	-4.09162	0.925691	-3.87993	0.000104486	0.000535465
ITGB3	33.1583	7.55681	1.04782	6.73473	1.64233e-11	1.84245e-10		PNP	72.7404	-1.81745	0.340024	-3.87459	0.000106804	0.000546297
AP2M1	46.3872	2.58181	0.311412	6.68507	2.30819e-11	2.5786e-10		MSH6	417.341	-1.30337	0.20779	-3.86625	0.000110521	0.000562077
SNX7	703.432	1.8228	0.198898	6.65064	2.91815e-11	3.24645e-10		SYTL1	5.28604	-3.7676	0.846952	-3.85807	0.000114287	0.000579023
GPC1	172.18	1.91076	0.21346	6.60903	3.86856e-11	4.28591e-10		DEK	2854.23	-1.18668	0.178374	-3.84968	0.000118273	0.000596954
PLP2	25.7954	6.22955	0.869347	6.59063	4.37954e-11	4.83197e-10		H1-4	6054.32	-1.46662	0.251634	-3.84139	0.000122339	0.000615151
SEMA5A	132.274	2.43736	0.294508	6.5783	4.75868e-11	5.22868e-10		IGF2BP2	57.2452	-1.64801	0.298826	-3.84172	0.000122174	0.000615151
SGCB	311.304	1.9765	0.225288	6.55383	5.60784e-11	6.1114e-10		TNFAIP8	79.3613	-1.27626	0.202418	-3.83494	0.000125594	0.000630332
HSPB1	1013.95	2.70307	0.33657	6.54565	5.92355e-11	6.42922e-10		RPL29	27.2822	-1.55252	0.275314	-3.82296	0.000131857	0.000659283
LY96	30.5591	7.36109	1.04949	6.53754	6.25371e-11	6.76008e-10		SNRPA	139.088	-1.6188	0.293128	-3.81677	0.000135208	0.000674775
TGFBR2	366.265	2.44424	0.298085	6.52245	6.91703e-11	7.38739e-10		H3C10	2501.5	-2.0451	0.408002	-3.78699	0.000152481	0.000758146
MAP2	649.458	1.87987	0.212355	6.49795	8.14224e-11	8.62689e-10		EXO1	169.607	-1.48964	0.262237	-3.77383	0.000160758	0.000793388
SOCS3	34.5389	4.49449	0.616531	6.47898	9.2347e-11	9.74571e-10		TOMM20	58.5699	-1.51227	0.269231	-3.75985	0.000170013	0.000835978
SNCA	222.469	1.92297	0.220087	6.46549	1.00971e-10	1.06139e-09		PAIP1	15.6281	-2.92049	0.646234	-3.74553	0.000180013	0.000881898
PRNP	59.4488	2.23178	0.269207	6.43287	1.25215e-10	1.30595e-09		NOP58	420.331	-1.01448	0.137401	-3.74439	0.00018083	0.000884279
MICALL1	61.8451	2.57122	0.323768	6.39723	1.58224e-10	1.63743e-09		SLITRK1	6.00141	-4.40964	1.05434	-3.70813	0.000208796	0.00101917
ASPN	24.5852	7.39029	1.07759	6.39414	1.6145e-10	1.66437e-09		FBL	204.86	-1.32095	0.221965	-3.69855	0.00021683	0.00105453
NLRC5	19.2772	5.40197	0.768877	6.37549	1.82373e-10	1.87283e-09		XBP1	50.7214	-1.58471	0.293262	-3.69878	0.000216636	0.00105453
AHRR	20.6109	4.77284	0.673456	6.34464	2.22941e-10	2.27195e-09		PIK3C2B	15.0801	-2.79764	0.622488	-3.69105	0.000223327	0.00108415
ACHE	45.3512	2.77384	0.359066	6.33265	2.40983e-10	2.44648e-09		H2BC7	3538.89	-1.7725	0.345379	-3.68436	0.000229275	0.00110899
CCN1	30.9098	3.25882	0.437871	6.30053	2.96637e-10	2.98876e-09		ERBB3	3.72101	-4.38094	1.06165	-3.65557	0.000256612	0.00123451
PRUNE2	27.1643	4.29742	0.603558	6.29172	3.13962e-10	3.15143e-09		BMP5	9.11362	-3.0519	0.704003	-3.62484	0.00028914	0.00138104
LAMP1	3097.04	1.78929	0.205631	6.26994	3.6119e-10	3.6119e-09		NET1	98.324	-1.35647	0.237329	-3.60879	0.000307624	0.00146149
COL11A1	87.2322	2.12267	0.262059	6.19199	5.94076e-10	5.87475e-09		GINS1	29.1091	-1.69897	0.335688	-3.57168	0.000354695	0.00167321
HLA-DRB1	30.6856	7.70582	1.17003	6.15867	7.33595e-10	7.22767e-09		CCNB2	167.935	-1.72771	0.344087	-3.56802	0.000359686	0.00169376
MALT1	943.692	1.72252	0.199308	6.13383	8.57885e-10	8.39031e-09		FOSB	4.88182	-4.45944	1.11385	-3.55473	0.000378364	0.00176614
HMGCS1	3703.3	1.53377	0.169446	6.10085	1.05504e-09	1.02809e-08		LOC102606465	61.2688	-1.5127	0.286035	-3.54048	0.000399401	0.00185784
SULF1	135.364	4.23368	0.613108	6.08976	1.13079e-09	1.09789e-08		GSDMB	35.8819	-1.7719	0.359354	-3.5394	0.000401036	0.0018622
TCTA	38.4434	2.42381	0.317253	6.06394	1.32824e-09	1.28493e-08		GINS2	701.493	-1.55652	0.300007	-3.52164	0.00042889	0.00198464
TNFSF12	18.4373	5.55806	0.839558	6.02467	1.69452e-09	1.62164e-08		MCM6	261.906	-1.28291	0.222584	-3.51738	0.00043583	0.00201327
COL5A2	323.025	2.6587	0.359854	5.99883	1.9875e-09	1.89522e-08		MYB	6.81627	-2.43743	0.552028	-3.50965	0.000448692	0.00206197
TGFB1	15.8498	7.20708	1.11851	5.99642	2.01718e-09	1.91668e-08		ORC1	41.9822	-1.69734	0.34186	-3.50242	0.000461047	0.00211511
CX3CL1	627.348	1.68812	0.198919	5.9729	2.33077e-09	2.19125e-08		RSL24D1	1087.67	-1.47202	0.277655	-3.50082	0.000463826	0.00212421
JADE2	30.3751	3.76468	0.546568	5.97306	2.32845e-09	2.19125e-08		CHERP	203.629	-1.08072	0.166079	-3.49663	0.000471168	0.00215414
CD9	42.6717	2.47309	0.33068	5.96675	2.42027e-09	2.26741e-08		EGFL6	2.81075	-4.84341	1.24594	-3.48604	0.000490229	0.00223364
SLFN12	40.399	5.50796	0.839794	5.96332	2.47166e-09	2.30745e-08		STAR	11.0125	-2.79427	0.658598	-3.48356	0.000494783	0.00225055
CXCL14	22.6375	6.39579	0.992261	5.94177	2.81959e-09	2.62311e-08		CHEK1	1964.72	-1.36385	0.253184	-3.41194	0.000645018	0.00289445
MSRA	11.5982	6.94341	1.09779	5.86943	4.37283e-09	4.02466e-08		RPA3	35.7277	-1.69325	0.350155	-3.40777	0.00065497	0.00292498
SQSTM1	65.5909	3.25069	0.468687	5.86892	4.38642e-09	4.02466e-08		HES3	2.06103	-4.75066	1.25122	-3.39721	0.000680772	0.00303449
DUSP3	777.568	1.52324	0.174678	5.85787	4.68842e-09	4.28701e-08		STRBP	250.244	-1.0066	0.149621	-3.38586	0.000709546	0.00315421
TFAP2C	70.3333	2.83758	0.399166	5.85615	4.73715e-09	4.31679e-08		NUDT21	358.309	-1.16298	0.195894	-3.38436	0.000713435	0.00315899
LUM	139.692	3.0728	0.442066	5.81995	5.88663e-09	5.34602e-08		LINC00623	9.22874	-2.5126	0.595243	-3.38114	0.000721849	0.00318568
NOL3	28.4469	2.97635	0.427383	5.79421	6.86428e-09	6.19176e-08		CEBPA	7.60064	-2.78145	0.677332	-3.36829	0.000756355	0.00332696
PLAT	32.3982	3.18414	0.464247	5.78171	7.39448e-09	6.64756e-08		NOP56	388.413	-1.55403	0.31317	-3.36568	0.000763546	0.00335307
TWIST1	30.3149	4.18092	0.637148	5.77718	7.59631e-09	6.78333e-08		MCM7	1121.7	-1.3205	0.244657	-3.35367	0.000797486	0.00348492
IFI44	152.109	3.7685	0.566143	5.77327	7.77471e-09	6.9195e-08		CHRNA4	2.46998	-5.00643	1.3579	-3.31867	0.000904475	0.00390768
HLA-C	16.1443	4.58653	0.707909	5.77267	7.80232e-09	6.92099e-08		CER1	7.99219	-3.67784	0.964036	-3.29639	0.000979367	0.00419056
SYTL2	17.8185	5.01223	0.784357	5.75278	8.77875e-09	7.68501e-08		FAM72B	10.4987	-2.59329	0.636202	-3.2903	0.00100082	0.00427549
TUBB6	78.7424	2.552	0.357283	5.74335	9.28203e-09	8.09902e-08		EPHX2	16.1901	-2.34286	0.560759	-3.28636	0.00101491	0.00432878
DIPK1A	218.029	2.16529	0.290098	5.74043	9.44355e-09	8.21312e-08		H2BC9	296.138	-1.62139	0.341477	-3.28394	0.00102368	0.00435919
BHLHE40	27.0466	2.89266	0.421352	5.67853	1.35856e-08	1.1589e-07		TARBP1	292.226	-1.38315	0.270085	-3.26991	0.00107583	0.00455222
HLA-E	135.863	2.28494	0.319651	5.58403	2.35012e-08	1.96703e-07		AKR1B1	106.865	-1.52422	0.314371	-3.25801	0.00112197	0.00472501
[truncated: 257 more rows]

## Sheet: Suppl. Table S5
8 h								24 h
[truncated: 14 more rows]

## Sheet: Suppl. Table S6
2 h								4 h								8 h								12 h								18 h								24 h								72 h
[truncated: 386 more rows]
[truncated: 5 more columns]

[truncated: 2 more sheets: Suppl. Table S7, Suppl. Table S8]
